# Supplementary material for: Domain-Based Identification and Analysis of Glutamate Receptor Ion Channels and Their Relatives in Prokaryotes
Source: PubMed Central journal article supplement (PMC2950845; doi:10.1371/journal.pone.0012827), 2010-10-06
Supplement: pone.0012827.s001.pdf [file pone.0012827.s001.pdf]

| #  | NRDB #  | gene annotation                                  | species                                        | protein acc # | nucleotide acc # | aa  |
|----|---------|--------------------------------------------------|------------------------------------------------|---------------|------------------|-----|
| 1  | 1460795 | ABC transport system glutamine-binding protein   | Nostoc sp. PCC 7120                            | NP_486951.1   | NC_003272        | 385 |
| 2  | 3455650 | COG0834: ABC-type amino acid transport/signal    | Anabaena variabilis ATCC 29413                 | ZP_00157839.2 | NZ_AAEA01000050  | 356 |
| 3  | 4367368 | Q3MEH3) Ionotropic glutamate receptor precursor  | Anabaena variabilis ATCC 29413                 |               |                  | 385 |
| 4  | 2674627 | COG0834: ABC-type amino acid transport/signal    | Nostoc punctiforme PCC 73102                   | ZP_00108493.1 | NZ_AAAY02000049  | 405 |
| 5  | 3574492 | glutamine ABC transporter, periplasmic           | Silicibacter pomeroyi DSS-3                    | YP_168531.1   | NC_003911        | 361 |
| 6  | 2998022 | COG0834: ABC-type amino acid transport/signal    | Magnetospirillum magnetotacticum MS-1          | ZP_00053934.2 | NZ_AAAP01003795  | 355 |
| 7  | 1461065 | glutamine-binding periplasmic protein of         | Nostoc sp. PCC 7120                            | NP_487227.1   | NC_003272        | 501 |
| 8  | 3466224 | COG0834: ABC-type amino acid transport/signal    | Anabaena variabilis ATCC 29413                 | ZP_00161034.2 | NZ_AAEA01000006  | 501 |
| 9  | 4110730 | extracellular solute-binding protein, family 3   | Silicibacter sp. TM1040                        | ZP_00622239.1 | NZ_AAFG02000007  | 354 |
| 10 | 2693307 | COG0834: ABC-type amino acid transport/signal    | Nostoc punctiforme PCC 73102                   | ZP_00107004.1 | NZ_AAAY02000074  | 501 |
| 11 | 25947   | glutamine-binding periplasmic protein/glutamine  | Synechocystis sp. PCC 6803                     | NP_440904.1   | NC_000911        | 530 |
| 12 | 3459274 | COG0834: ABC-type amino acid transport/signal    | Nostoc punctiforme PCC 73102                   | ZP_00109899.2 | NZ_AAAY02000016  | 496 |
| 13 | 3657767 | Amino acid ABC transporter binding protein and   | Gluconobacter oxydans 621H                     | YP_191970.1   | NC_006677        | 508 |
| 14 | 797334  | Glutamine-binding periplasmic protein fused to   | Clostridium acetobutylicum ATCC 824            | NP_346756.1   | NC_003030        | 477 |
| 15 | 1972140 | putative glutamine ABC transporter, permease     | Streptococcus mutans UA159                     | NP_721218.1   | NC_004350        | 728 |
| 16 | 730124  | hypothetical protein                             | Streptococcus pyogenes M1 GAS                  | NP_269437.1   | NC_002737        | 724 |
| 17 | 4149401 | COG0834: ABC-type amino acid transport/signal    | Streptococcus pneumoniae TIGR4                 | ZP_00404160.1 | NZ_AAGY01000014  | 539 |
| 18 | 3236238 | Glutamine transport system permease protein      | Streptococcus pyogenes MGAS10394               | YP_060363.1   | NC_006086        | 724 |
| 19 | 4239816 | transporter                                      | Streptococcus pyogenes MGAS5005                | YP_282439.1   | NC_007297        | 724 |
| 20 | 1889490 | hypothetical protein                             | Streptococcus pyogenes SSI-1                   | NP_802123.1   | NC_004606        | 724 |
| 21 | 4239581 | transporter                                      | Streptococcus pyogenes MGAS6180                | YP_280525.1   | NC_007296        | 724 |
| 22 | 1755498 | hypothetical protein                             | Streptococcus pyogenes MGAS8232                | NP_607432.1   | NC_003485        | 724 |
| 23 | 2321967 | possible ligand gated channel (GIC family)       | Synechococcus sp. WH 8102                      | NP_896860.1   | NC_005070        | 356 |
| 24 | 3459393 | COG0834: ABC-type amino acid transport/signal    | Leuconostoc mesenteroides subsp. mesenteroides | ZP_00063230.2 | NZ_AABH02000012  | 463 |
| 25 | 2658706 | extracellular solute-binding protein, family     | Trichodesmium erythraeum IMS101                | ZP_00674117.1 | NZ_AABK04000007  | 360 |
| 26 | 1103184 | ABC transporter membrane spanning permease       | Streptococcus pneumoniae R6                    | NP_358713.1   | NC_003098        | 721 |
| 27 | 794435  | amino acid ABC transporter, amino acid-binding   | Streptococcus pneumoniae TIGR4                 | NP_345706.1   | NC_003028        | 721 |
| 28 | 2140426 | amino acid ABC transporter, amino                | Enterococcus faecalis V583                     | NP_814508.1   | NC_004668        | 722 |
| 29 | 3860261 | COG0834: ABC-type amino acid transport/signal    | Lactococcus lactis subsp. cremoris SK11        | ZP_00383312.1 | NZ_AAGO01000019  | 704 |
| 30 | 3972343 | GlnP                                             | Lactococcus lactis subsp. cremoris             | AAX82492.1    | AY881998         | 714 |
| 31 | 656323  | glutamine ABC transporter permease and substrate | Lactococcus lactis subsp. lactis I11403        | NP_267915.1   | NC_002662        | 714 |

|    |         |                                                  |                                               |               |                 |     |
|----|---------|--------------------------------------------------|-----------------------------------------------|---------------|-----------------|-----|
| 32 | 4521252 | Lactobacillus sakei strain 23K complete genome   | Lactobacillus sakei strain 23K                | CAI55799.1    | CR936503        | 478 |
| 33 | 4508428 | extracellular solute-binding protein, family 3   | Chlorobium chlorochromatii CaD3               | YP_378562.1   | NC_007514       | 352 |
| 34 | 2076917 | sensory transduction protein kinase              | Clostridium tetani E88                        | NP_782862.1   | NC_004557       | 673 |
| 35 | 1518316 | probable amino acid ABC transporter              | Clostridium perfringens str. 13               | NP_563009.1   | NC_003366       | 502 |
| 36 | 3498920 | glutamine ABC uptake transporter                 | Streptococcus thermophilus LMG 18311          | YP_139919.1   | NC_006448       | 736 |
| 37 | 4507879 | Ionotropic glutamate receptor                    | Synechococcus sp. CC9902                      | YP_376778.1   | NC_007513       | 357 |
| 38 | 3861175 | COG0834: ABC-type amino acid transport/signal    | Streptococcus thermophilus LMD-9              | ZP_00388109.1 | NZ_AAGS01000073 | 736 |
| 39 | 2080013 | glutamine ABC transporter, substrate binding and | Lactobacillus plantarum WCFS1                 | NP_784545.1   | NC_004567       | 478 |
| 40 | 4508147 | extracellular solute-binding protein, family 3   | Pelodictyon luteolum DSM 273                  | ABB23418.1    | CP000096        | 378 |
| 41 | 2999572 | extracellular solute-binding protein, family     | Crocospaera watsonii WH 8501                  | ZP_00517290.1 | NZ_AADV02000060 | 368 |
| 42 | 3681965 | glutamate-gated potassium channel                | Vibrio fischeri ES114                         | YP_204476.1   | NC_006840       | 366 |
| 43 | 4462221 | conserved protein of unknown function_ putative  | Pseudoalteromonas haloplanktis TAC125         | YP_339120.1   | NC_007481       | 349 |
| 44 | 4511146 | Pelodictyon luteolum DSM 273, complete genome    | Pelodictyon luteolum DSM 273                  | ABB23724.1    | CP000096        | 990 |
| 45 | 4511158 | Amino acid ABC transporter, permease protein     | Pelodictyon luteolum DSM 273                  | YP_374941.1   | NC_007512       | 990 |
| 46 | 4391792 | extracellular solute-binding protein, family 3   | Prosthecochloris vibrioformis DSM 265         | ZP_00660701.1 | NZ_AAJD01000001 | 383 |
| 47 | 3178539 | COG0834: ABC-type amino acid transport/signal    | Pediococcus pentosaceus ATCC 25745            | ZP_00323477.1 | NZ_AAEV01000004 | 483 |
| 48 | 3176719 | COG0834: ABC-type amino acid transport/signal    | Oenococcus oeni PSU-1                         | ZP_00320163.1 | NZ_AABJ03000001 | 468 |
| 49 | 3644201 | COG0834: ABC-type amino acid transport/signal    | Streptococcus pyogenes M49 591                | ZP_00365576.1 | NZ_AAFV01000170 | 401 |
| 50 | 2959346 | hypothetical protein                             | Photobacterium profundum SS9                  | YP_132561.1   | NC_006371       | 372 |
| 51 | 760694  | GlnP                                             | Streptococcus agalactiae                      | AAK57382.1    | AF372619        | 727 |
| 52 | 4422797 | polar amino acid uptake (PAAT) family ABC        | Streptococcus agalactiae A909                 | YP_330104.1   | NC_007432       | 727 |
| 53 | 1919262 | glutamine ABC transporter, glutamine-binding     | Streptococcus agalactiae 2603V/R              | NP_688460.1   | NC_004116       | 727 |
| 54 | 3856627 | COG0834: ABC-type amino acid transport/signal    | Lactobacillus delbrueckii subsp. bulgaricus A | ZP_00386722.1 | NZ_AAGQ01000090 | 334 |
| 55 | 4127605 | Amino acid ABC transporter, permease protein     | Enterococcus faecium DO                       | ZP_00604829.1 | NZ_AAAK03000089 | 500 |
| 56 | 26211   | hypothetical protein                             | Synechocystis sp. PCC 6803                    | NP_441171.1   | NC_000911       | 397 |
| 57 | 1432651 | hypothetical protein                             | Listeria innocua Clip11262                    | NP_470182.1   | NC_003212       | 480 |
| 58 | 3176893 | glutamine ABC transporter                        | Listeria monocytogenes str. 1/2a F6854        | ZP_00232467.1 | NZ_AADQ01000002 | 480 |
| 59 | 2959597 | glutamine ABC transporter                        | Listeria monocytogenes str. 4b F2365          | YP_013467.1   | NC_002973       | 480 |
| 60 | 1429910 | hypothetical protein                             | Listeria monocytogenes EGD-e                  | NP_464373.1   | NC_003210       | 480 |
| 61 | 3177117 | glutamine ABC transporter                        | Listeria monocytogenes str. 4b H7858          | ZP_00229847.1 | NZ_AADR01000005 | 480 |
| 62 | 2322249 | possible ligand gated channel (GIC family)       | Prochlorococcus marinus str. MIT 9313         | NP_894348.1   | NC_005071       | 359 |
| 63 | 4124856 | extracellular solute-binding protein, family 3   | Paracoccus denitrificans PD1222               | ZP_00629025.1 | NZ_AAIT01000002 | 360 |

|    |         |                                                |                                                   |               |                 |     |
|----|---------|------------------------------------------------|---------------------------------------------------|---------------|-----------------|-----|
| 64 | 3859018 | COG0834: ABC-type amino acid transport/signal  | Lactobacillus casei ATCC 334                      | ZP_00384469.1 | NZ_AAGR01000100 | 469 |
| 65 | 4138225 | extracellular solute-binding protein, family   | Chlorobium phaeobacteroides BS1                   | ZP_00530895.1 | NZ_AAIC01000004 | 416 |
| 66 | 2508200 | periplasmic substrate-binding protein/sensor   | Geobacter sulfurreducens PCA                      | NP_953800.1   | NC_002939       | 590 |
| 67 | 1434059 | hypothetical protein                           | Listeria innocua Clip11262                        | NP_471683.1   | NC_003212       | 486 |
| 68 | 3942849 | Q4JLI8) Lr1198                                 | Lactobacillus reuteri                             |               |                 | 487 |
| 69 | 3169121 | amino acid ABC transporter, permease protein   | Listeria monocytogenes str. 4b H7858              | ZP_00232127.1 | NZ_AADR01000117 | 395 |
| 70 | 4405283 | extracellular solute-binding protein, family   | Pelobacter propionicus DSM 2379                   | ZP_00676317.1 | NZ_AAJH01000002 | 780 |
| 71 | 2959738 | amino acid ABC transporter, permease protein   | Listeria monocytogenes str. 4b F2365              | YP_014872.1   | NC_002973       | 486 |
| 72 | 1431258 | hypothetical protein                           | Listeria monocytogenes EGD-e                      | NP_465774.1   | NC_003210       | 486 |
| 73 | 3050602 | putative extracellular glutamine-binding       | Staphylococcus aureus subsp. aureus MRSA          | YP_041324.1   | NC_002952       | 485 |
| 74 | 2679109 | GlnQ                                           | Mycobacterium avium subsp. paratuberculosis       | NP_958986.1   | NC_002944       | 579 |
| 75 | 1807804 | hypothetical protein                           | Staphylococcus aureus subsp. aureus MW2           | NP_646616.1   | NC_003923       | 485 |
| 76 | 740171  | hypothetical protein                           | Staphylococcus aureus subsp. aureus N315          | NP_374965.1   | NC_002745       | 441 |
| 77 | 2139439 | amino acid ABC transporter, amino              | Enterococcus faecalis V583                        | NP_814632.1   | NC_004668       | 487 |
| 78 | 4510424 | Amino acid ABC transporter, permease protein   | Pelodictyon luteolum DSM 273                      | ABB23899.1    | CP000096        | 508 |
| 79 | 3967309 | hypothetical protein                           | Staphylococcus haemolyticus JCSC1435              | YP_253019.1   | NC_007168       | 484 |
| 80 | 2051188 | glutamine-binding periplasmic protein          | Staphylococcus epidermidis ATCC 12228             | NP_765096.1   | NC_004461       | 485 |
| 81 | 3625978 | amino acid ABC transporter, permease/amino     | Staphylococcus epidermidis RP62A                  | YP_188964.1   | NC_002976       | 485 |
| 82 | 3178530 | COG0834: ABC-type amino acid transport/signal  | Pediococcus pentosaceus ATCC 25745                | ZP_00323409.1 | NZ_AAEV01000004 | 480 |
| 83 | 2675945 | COG0834: ABC-type amino acid transport/signal  | Leuconostoc mesenteroides subsp. mesenteroides    | ZP_00064352.1 | NZ_AABH02000075 | 485 |
| 84 | 4148754 | IMP dehydrogenase/GMP reductase:Bacterial      | Desulfuromonas acetoxidans DSM 684                | ZP_00550581.1 | NZ_AAEW01000009 | 616 |
| 85 | 4521215 | Putative amino acid ABC transporter, substrate | Lactobacillus sakei subsp. sakei 23K              | CAI55358.1    | CR936503        | 487 |
| 86 | 4405380 | PAS                                            | Pelobacter propionicus DSM 2379                   | ZP_00678091.1 | NZ_AAJH01000010 | ### |
| 87 | 2028708 | sensory box protein                            | Pseudomonas putida KT2440                         | NP_742553.1   | NC_002947       | ### |
| 88 | 4284112 | truncated ABC-type amino acid transport system | Staphylococcus saprophyticus subsp. saprophyticus | YP_301027.1   | NC_007350       | 398 |
| 89 | 4397468 | extracellular solute-binding protein, family 3 | Syntrophobacter fumaroxidans MPOB                 | ZP_00665141.1 | NZ_AAJF01000004 | 445 |
| 90 | 2495900 | ABC-type amino acid transport system, permease | Onion yellows phytoplasma OY-M                    | NP_950330.1   | NC_005303       | 601 |
| 91 | 2742825 | ABC transporter permease component             | Lactobacillus johnsonii NCC 533                   | NP_964641.1   | NC_005362       | 497 |
| 92 | 4400497 | PAS                                            | Thiomicrospira denitrificans ATCC 33889           | ZP_00650326.1 | NZ_AAJA01000001 | 633 |
| 93 | 4162782 | PAS                                            | Magnetococcus sp. MC-1                            | ZP_00606263.1 | NZ_AAAN03000005 | ### |
| 94 | 4119172 | K channel, pore region                         | Chlorobium phaeobacteroides BS1                   | ZP_00533070.1 | NZ_AAIC01000173 | 358 |
| 95 | 1972106 | putative amino acid ABC transporter, permease  | Streptococcus mutans UA159                        | NP_720706.1   | NC_004350       | 517 |

|     |         |                                                                                                        |                                 |               |                 |     |
|-----|---------|--------------------------------------------------------------------------------------------------------|---------------------------------|---------------|-----------------|-----|
| 96  | 2688998 | COG0834: ABC-type amino acid transport/signal                                                          | Lactobacillus gasseri           | ZP_00045971.1 | NZ_AAAO02000001 | 501 |
| 97  | 793755  | amino acid ABC transporter, amino acid-binding                                                         | Streptococcus pneumoniae TIGR4  | NP_344974.1   | NC_003028       | 521 |
| 98  | 4149446 | COG0834: ABC-type amino acid transport/signal                                                          | Streptococcus pneumoniae TIGR4  | ZP_00402876.1 | NZ_AAGY01000123 | 507 |
| 99  | 4422730 | (Q3K3N6) Amino acid ABC transporter, amino acid-binding/permease protein, His/Glu/Gln/Arg/opine family | Streptococcus agalactiae A909   |               |                 | 516 |
| 100 | 1919160 | hypothetical protein                                                                                   | Streptococcus agalactiae NEM316 | NP_734602.1   | NC_004368       | 516 |
