# Supplementary material for: Domain-Based Identification and Analysis of Glutamate Receptor Ion Channels and Their Relatives in Prokaryotes
Source: PubMed Central journal article supplement (PMC2950845; doi:10.1371/journal.pone.0012827), 2010-10-06

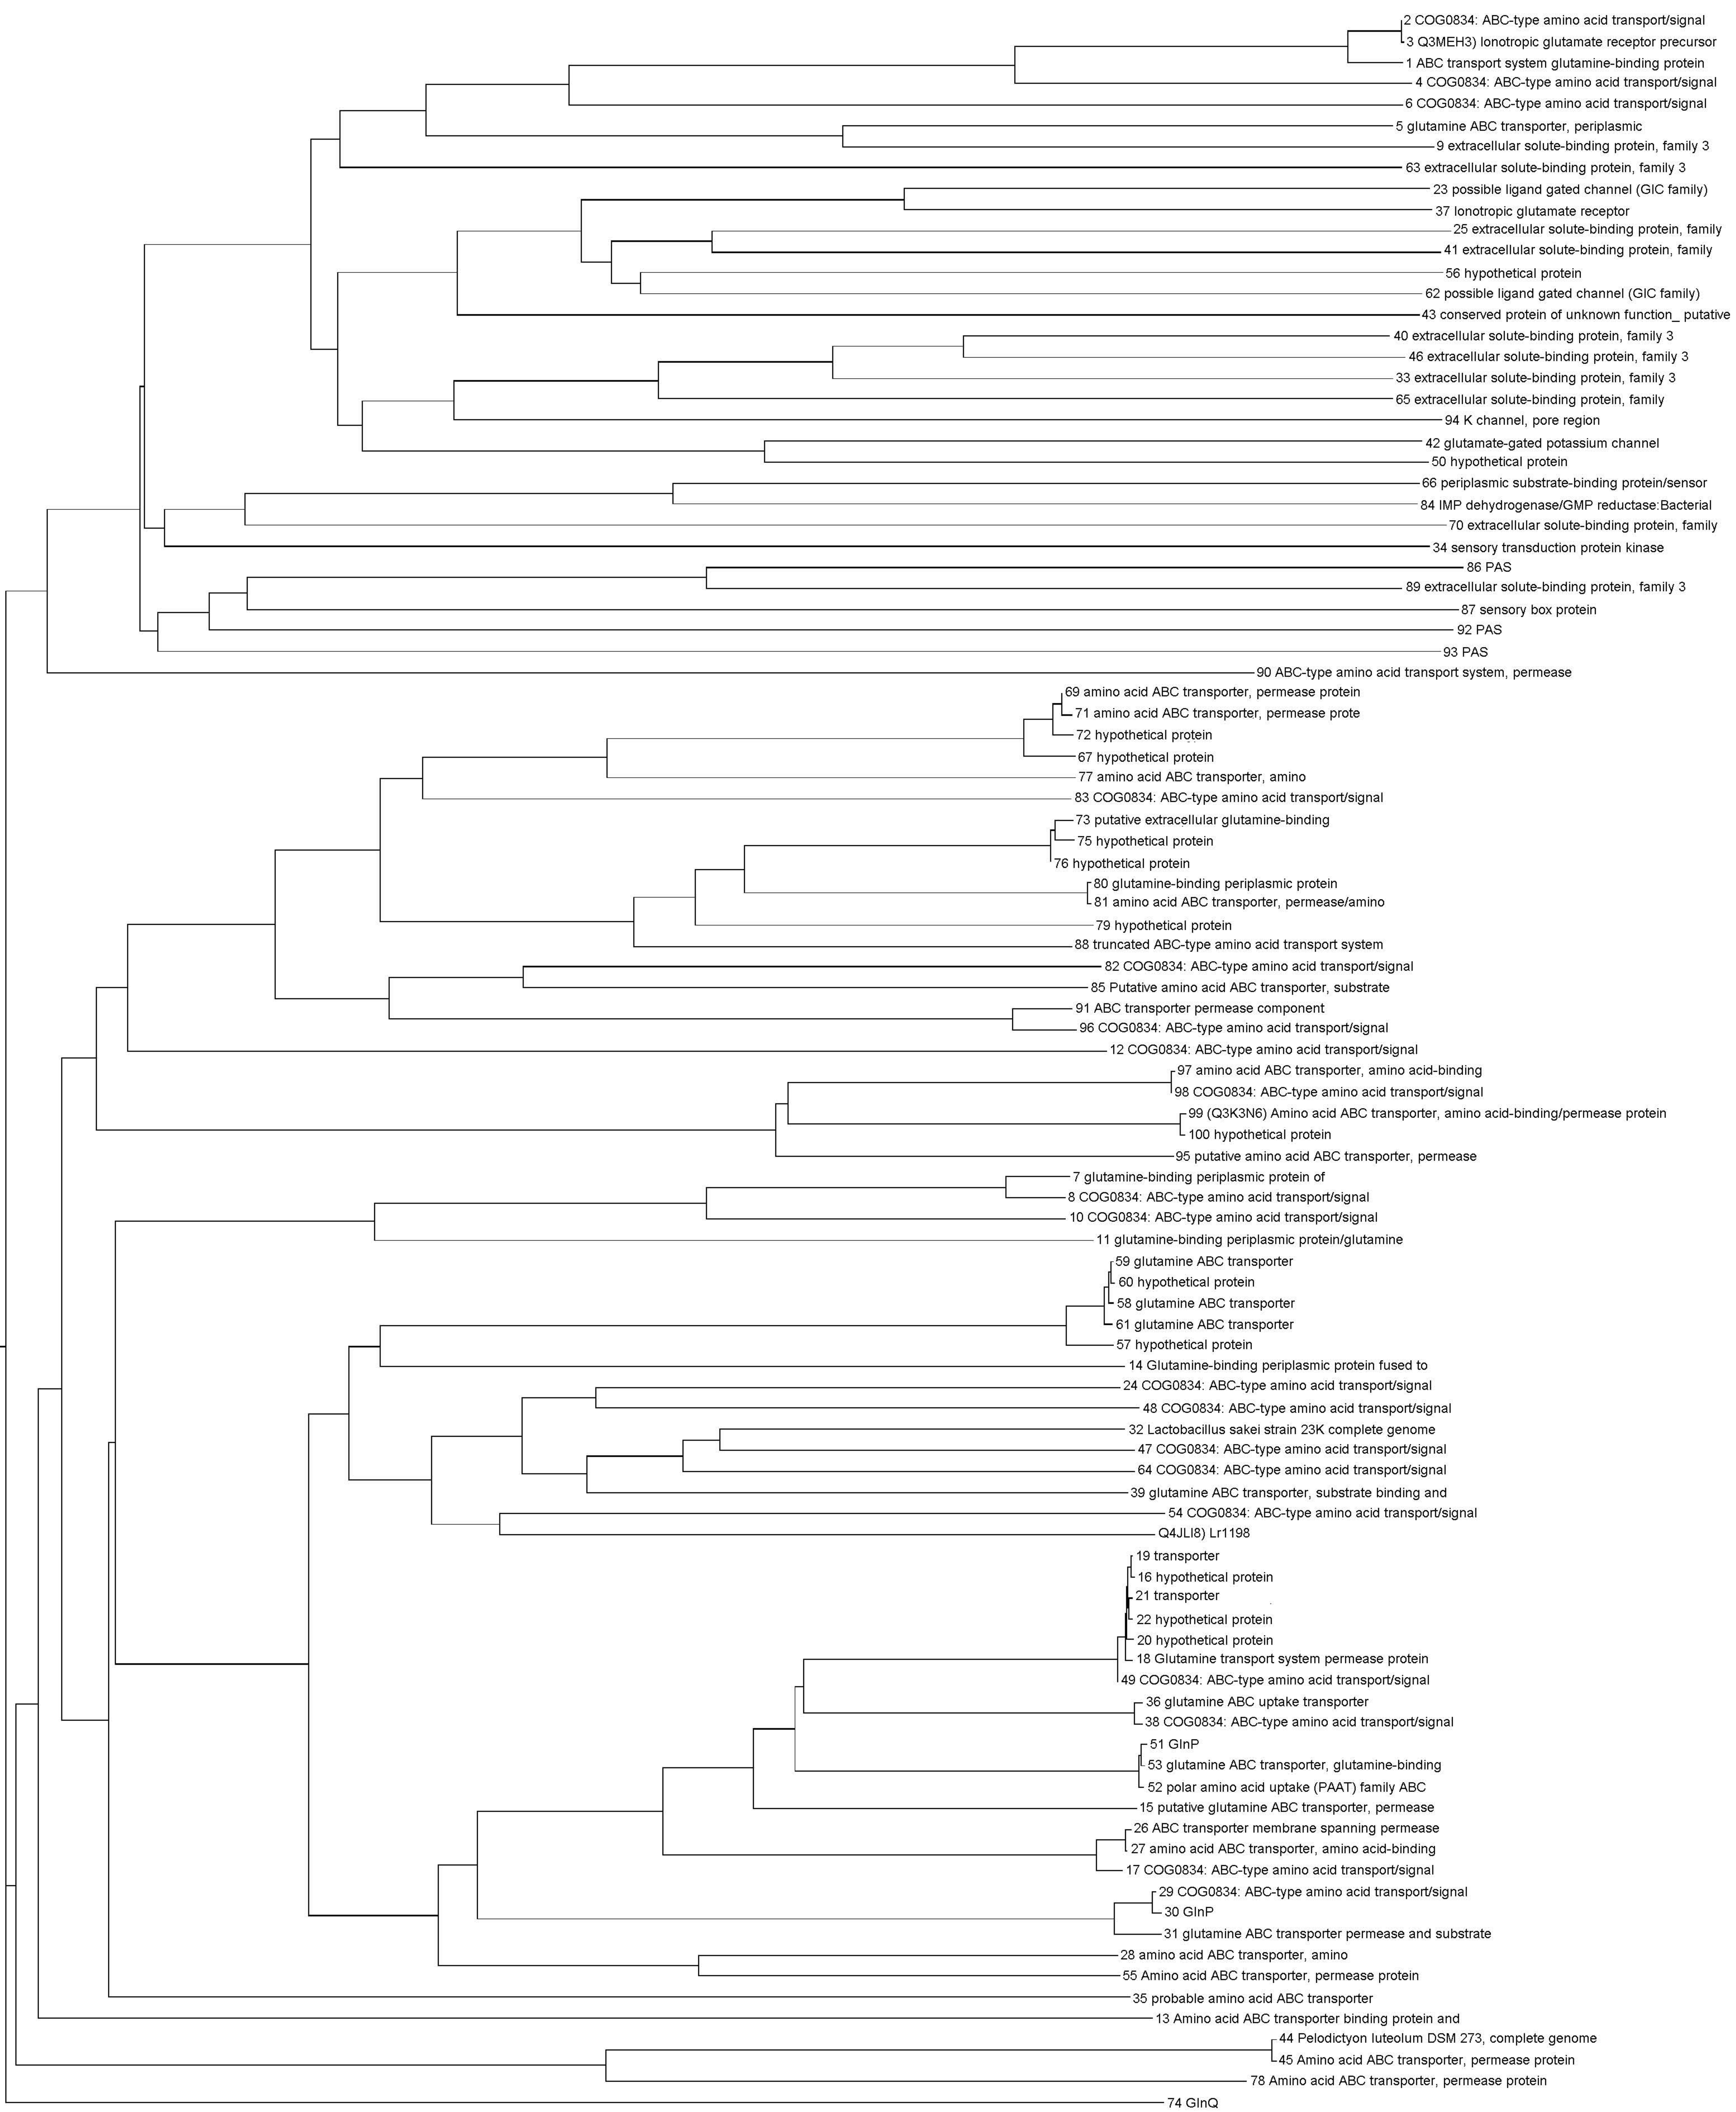

Supplement: pone.0012827.s002.pdf [file pone.0012827.s002.pdf]
