# Supplementary material for: Domain-Based Identification and Analysis of Glutamate Receptor Ion Channels and Their Relatives in Prokaryotes
Source: PubMed Central journal article supplement (PMC2950845; doi:10.1371/journal.pone.0012827), 2010-10-06
Supplement: pone.0012827.s003.pdf [file pone.0012827.s003.pdf]

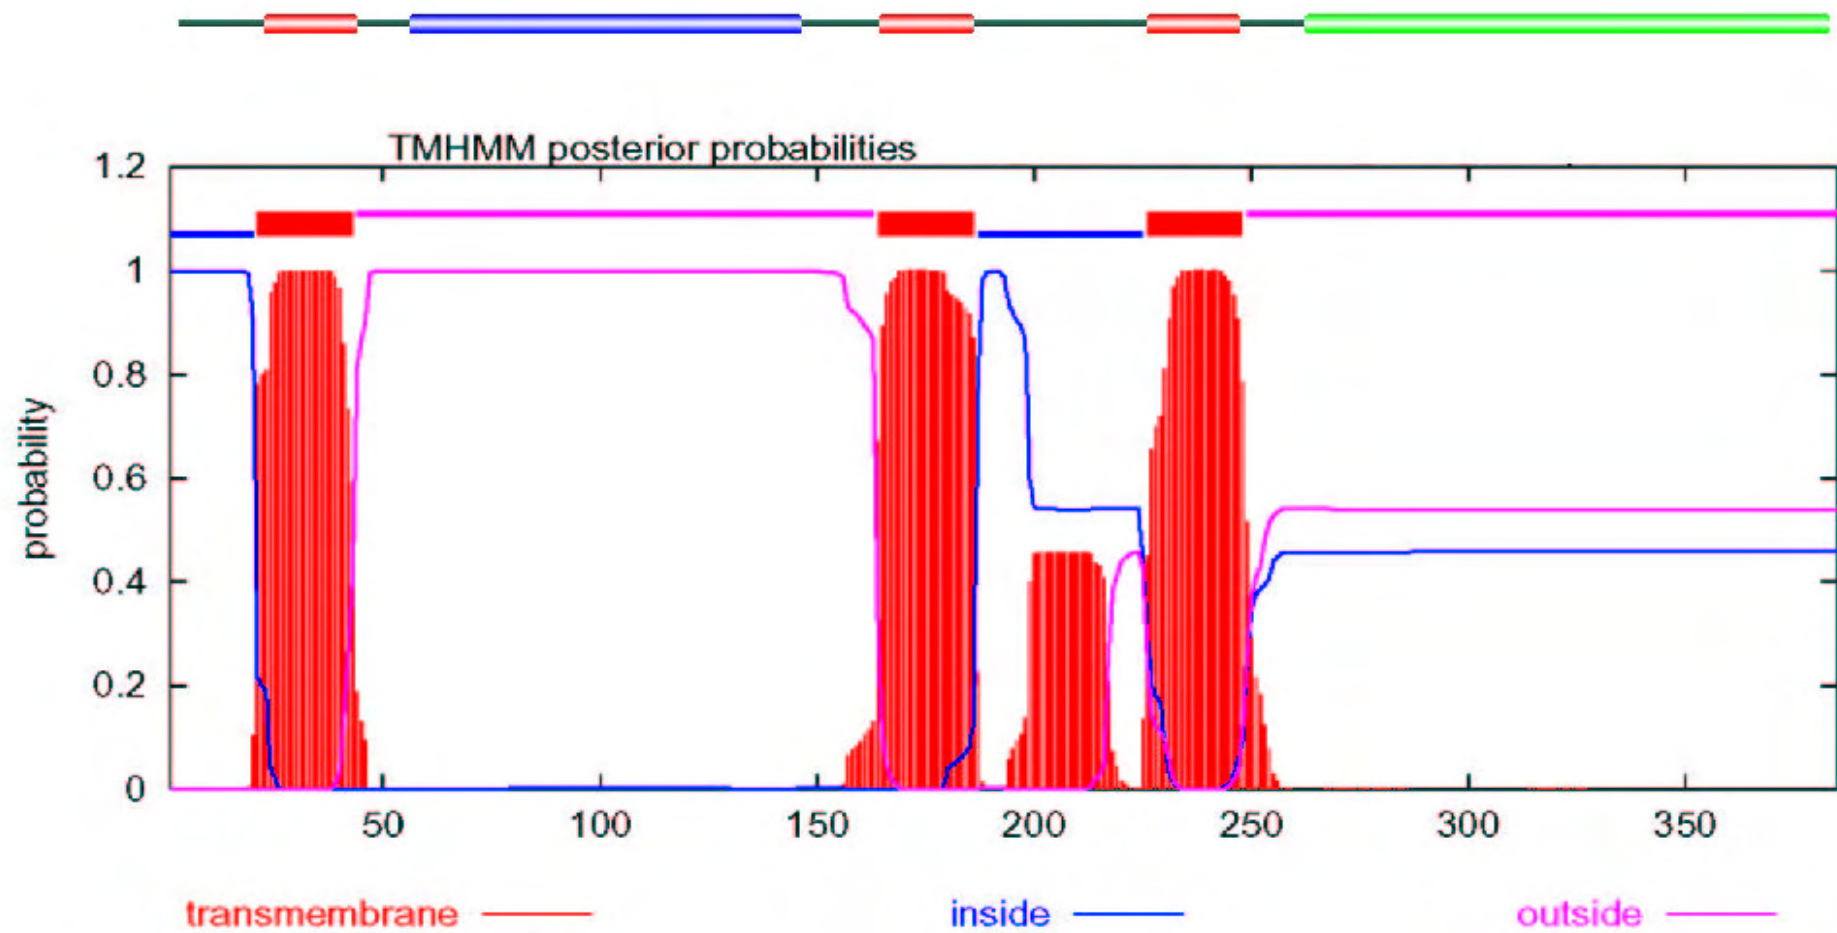

01

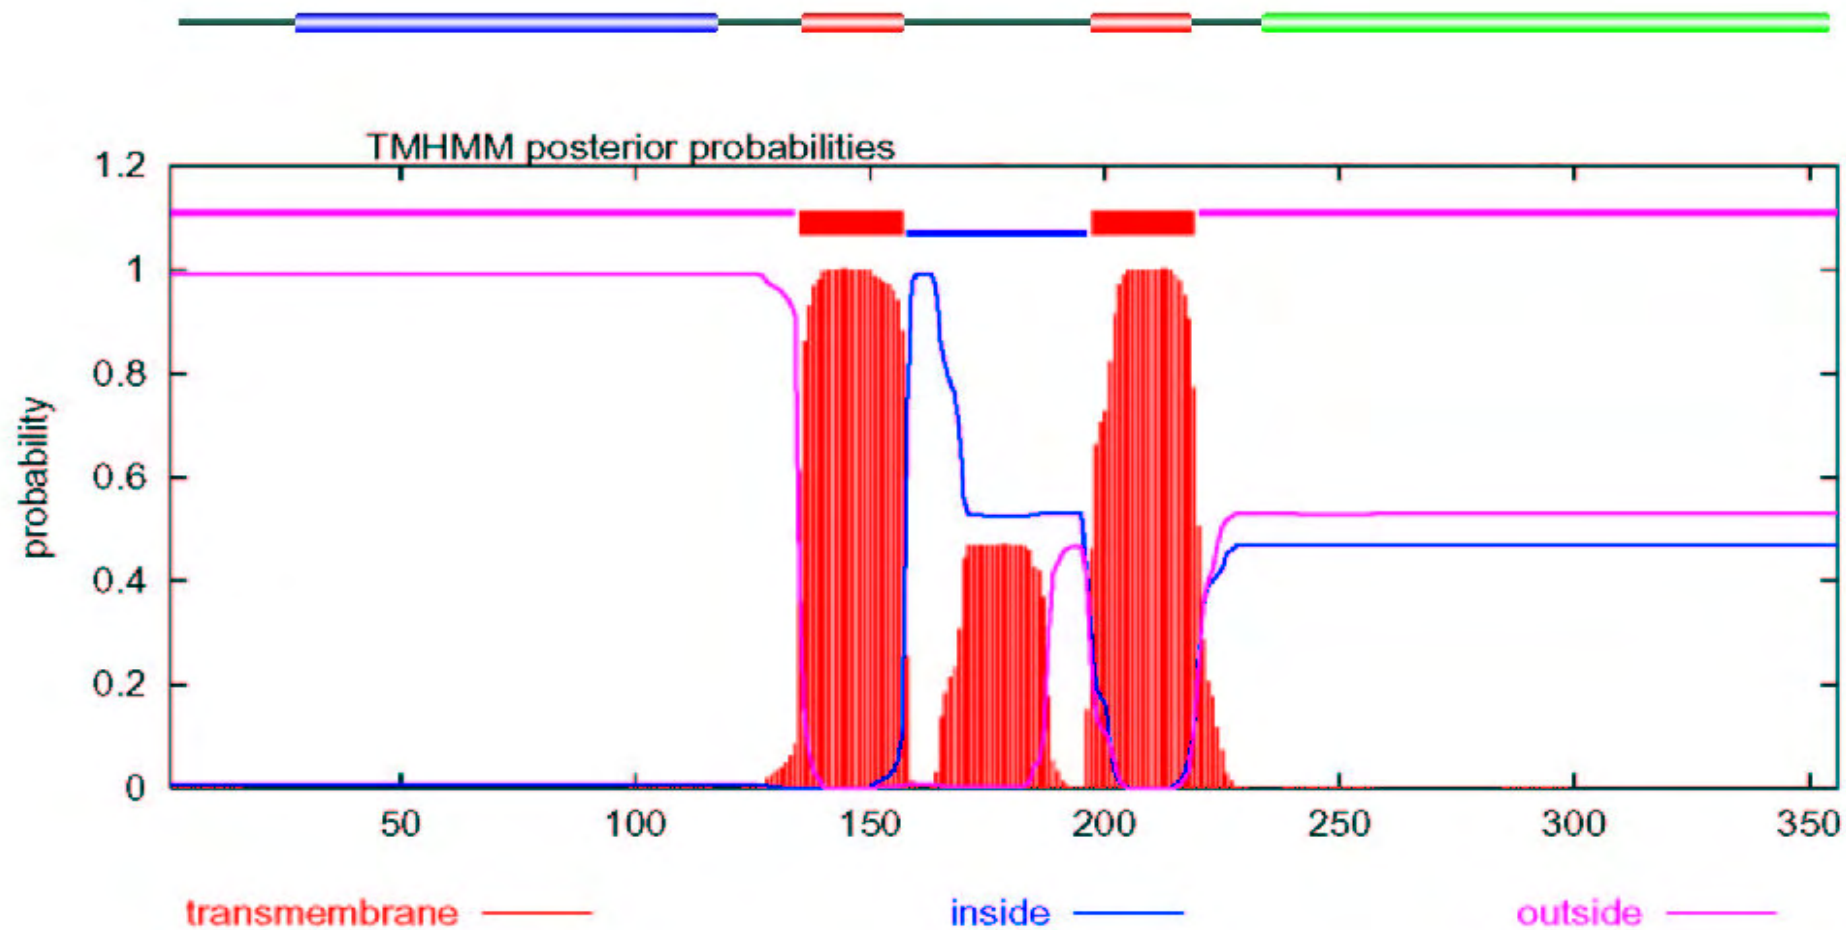

02

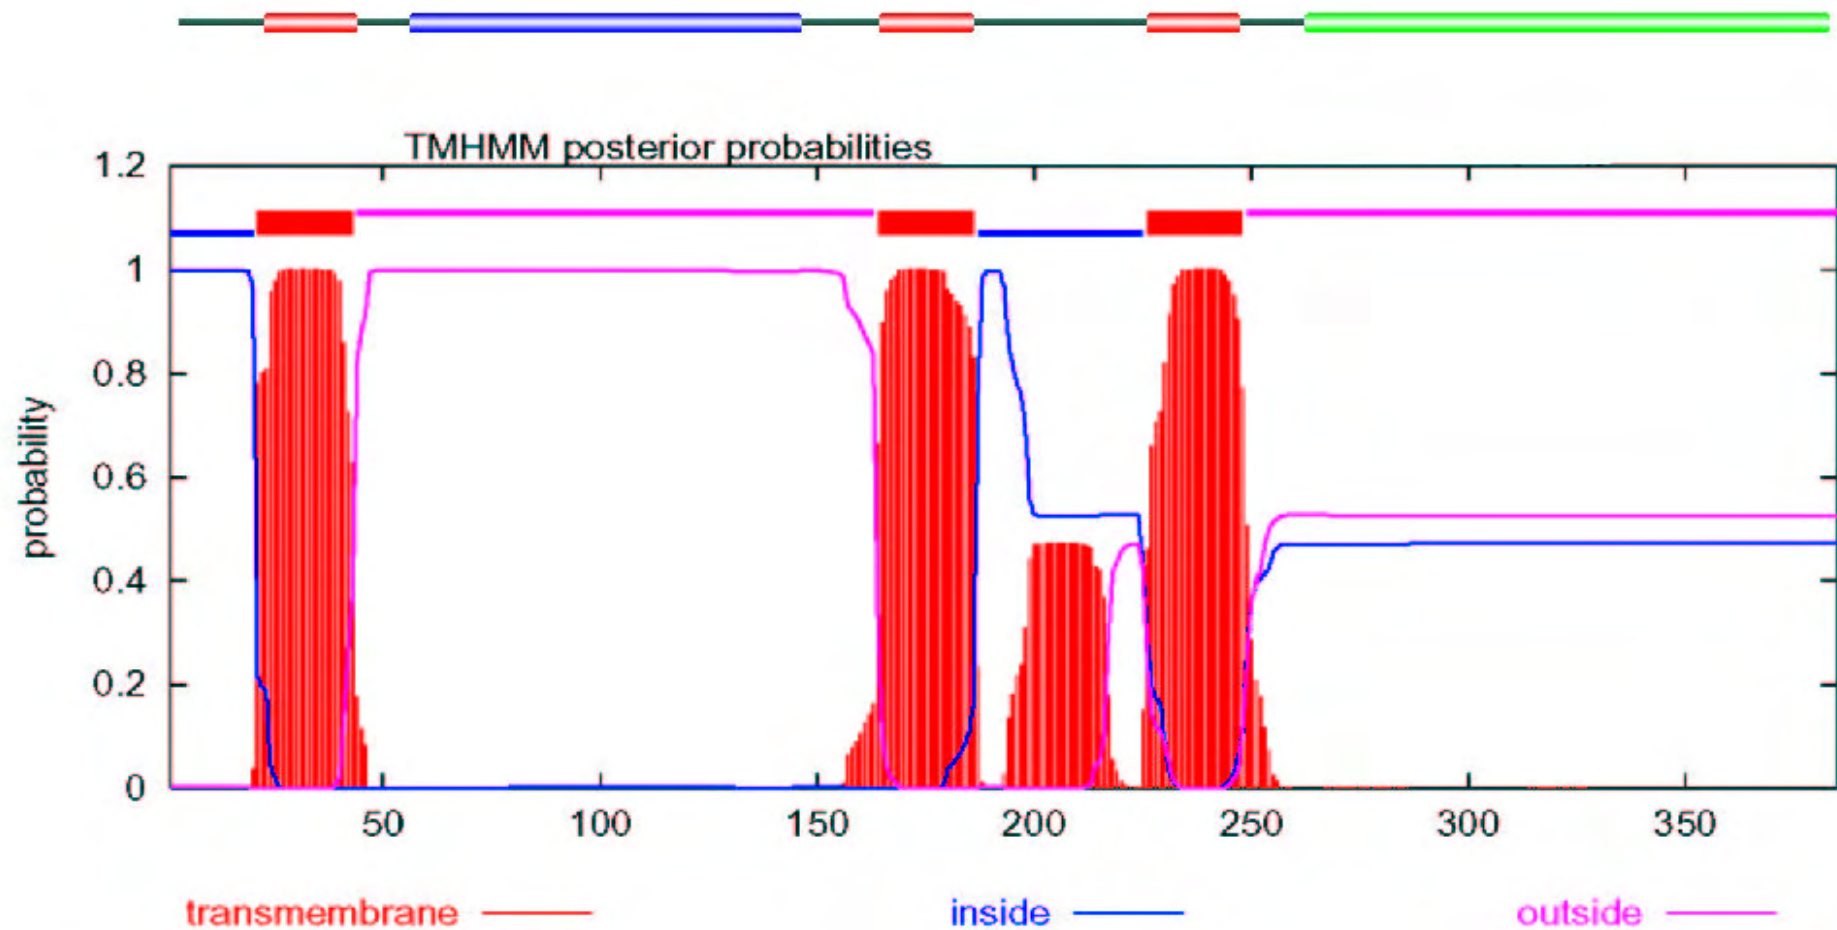

03

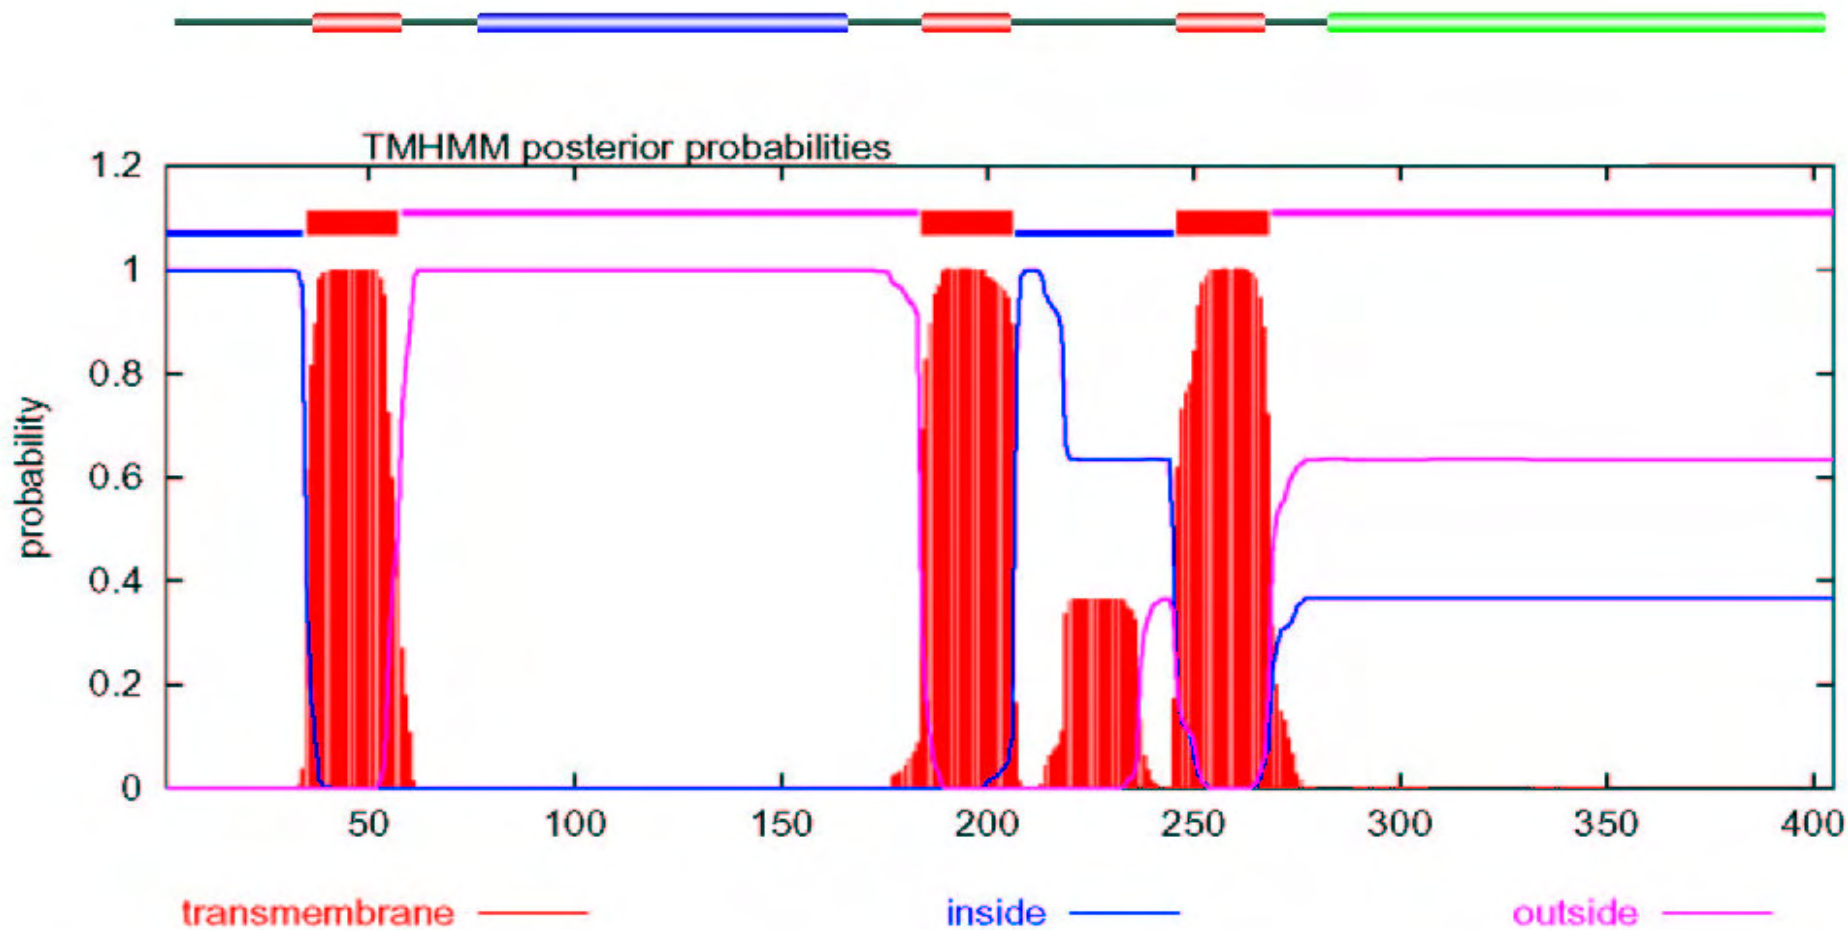

04



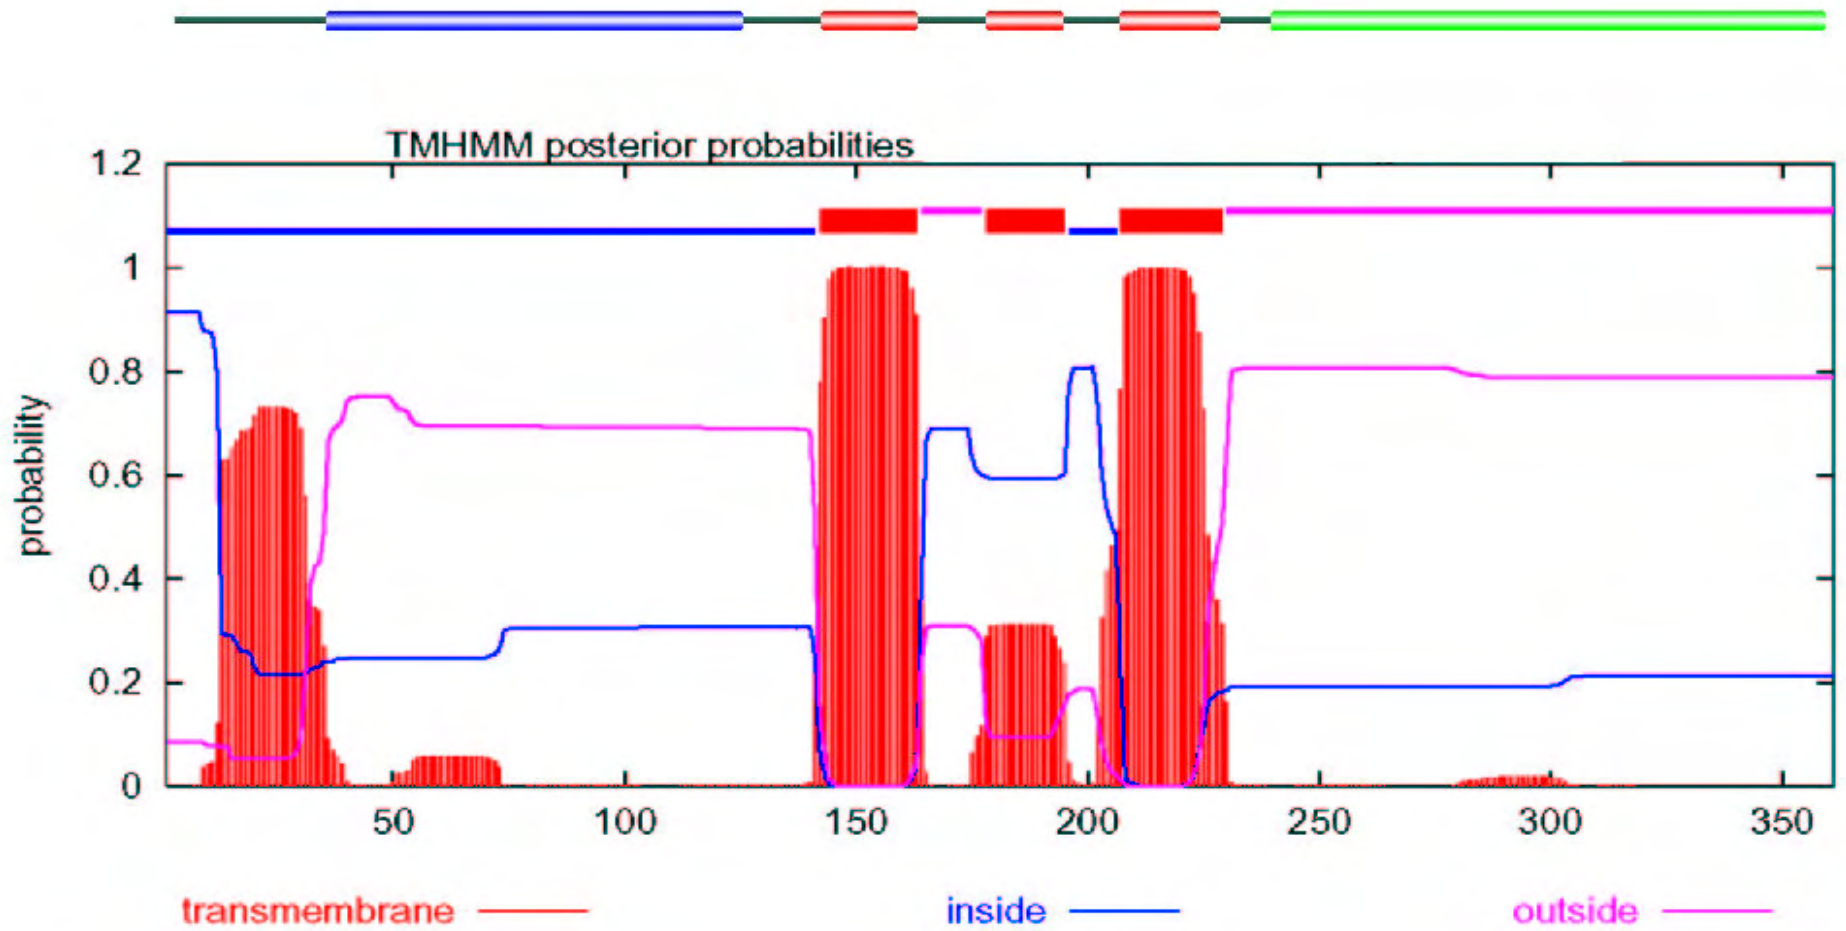

05

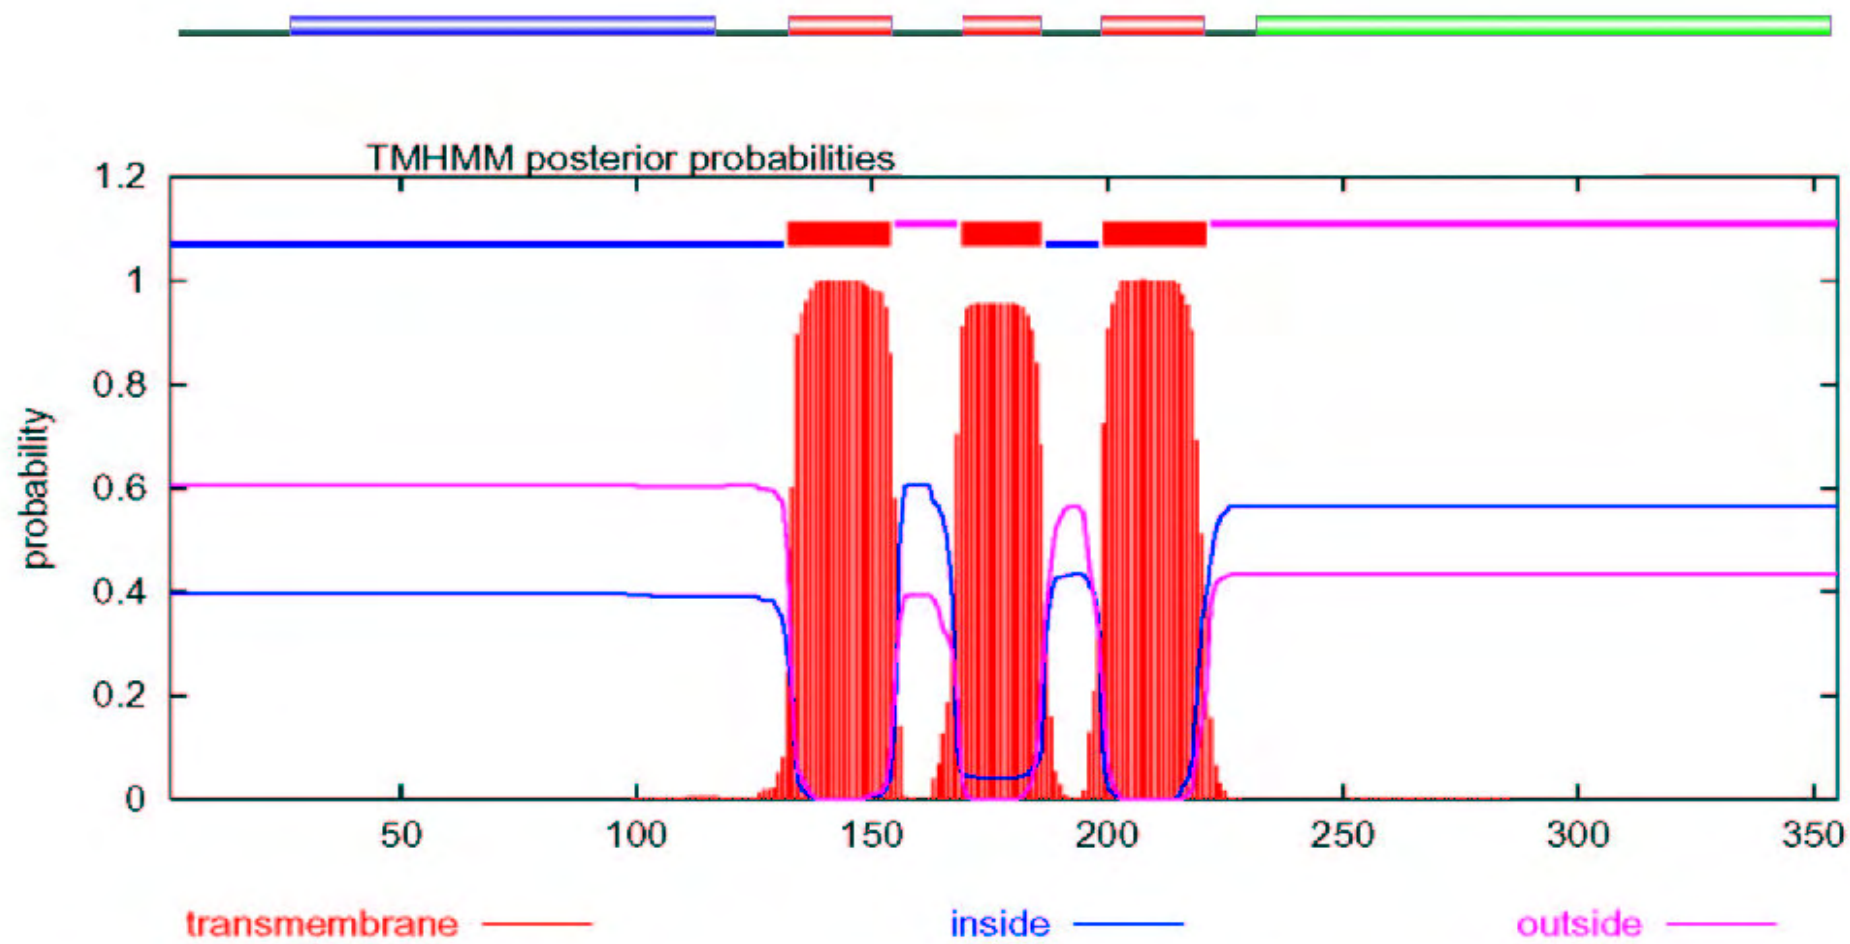

06

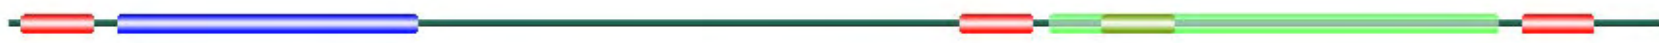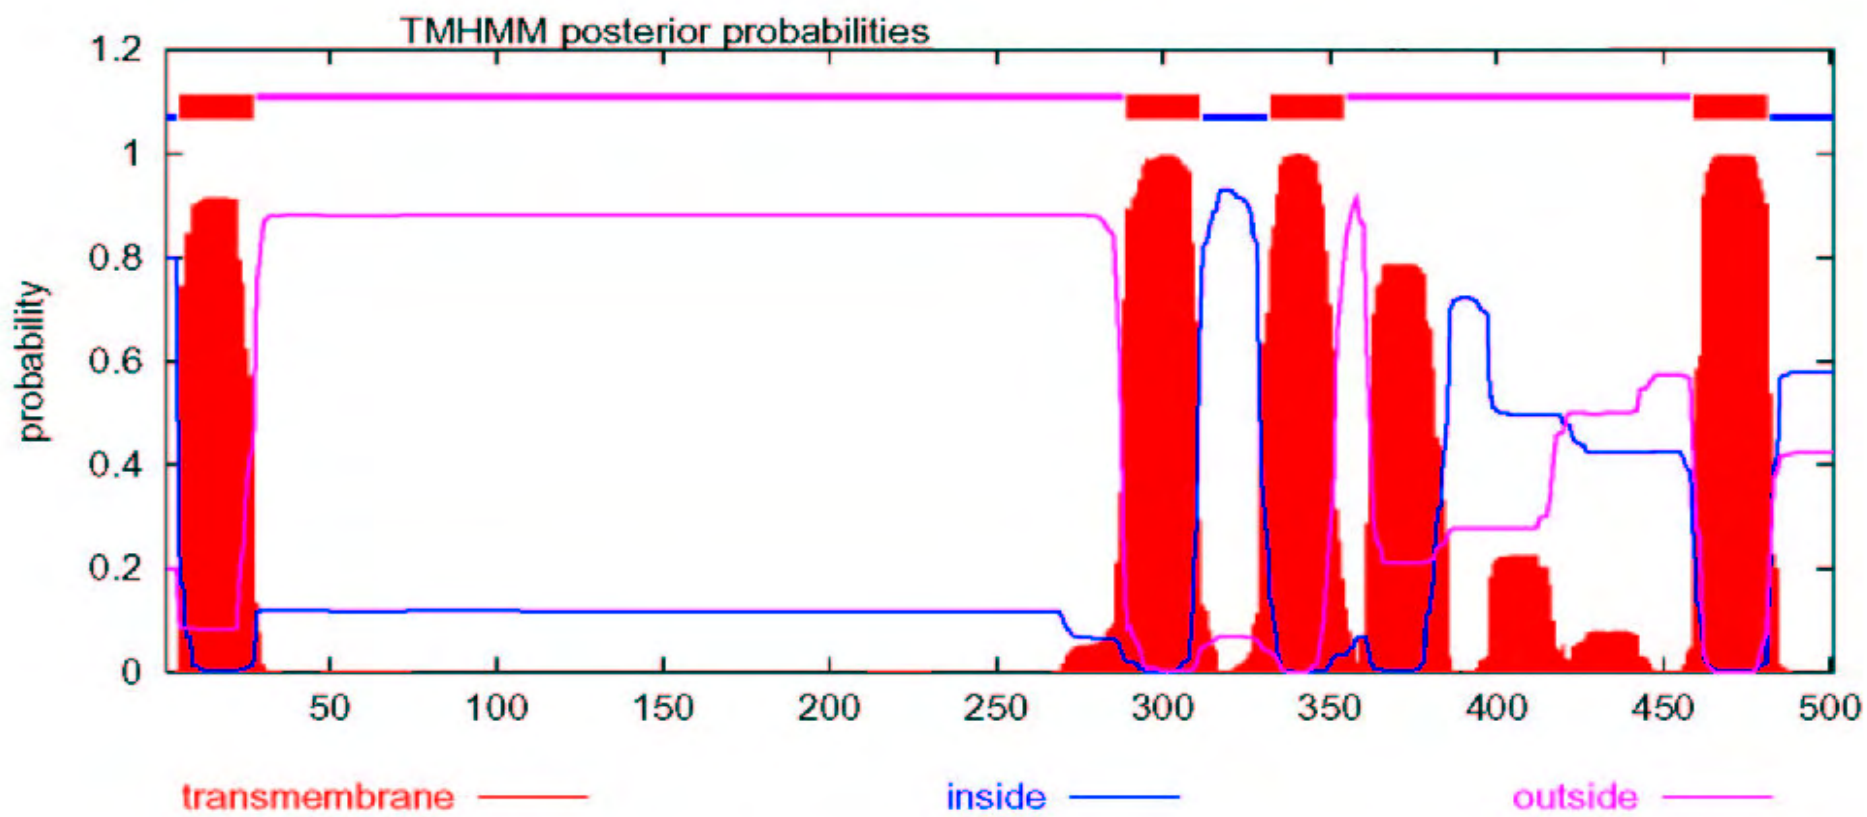

07

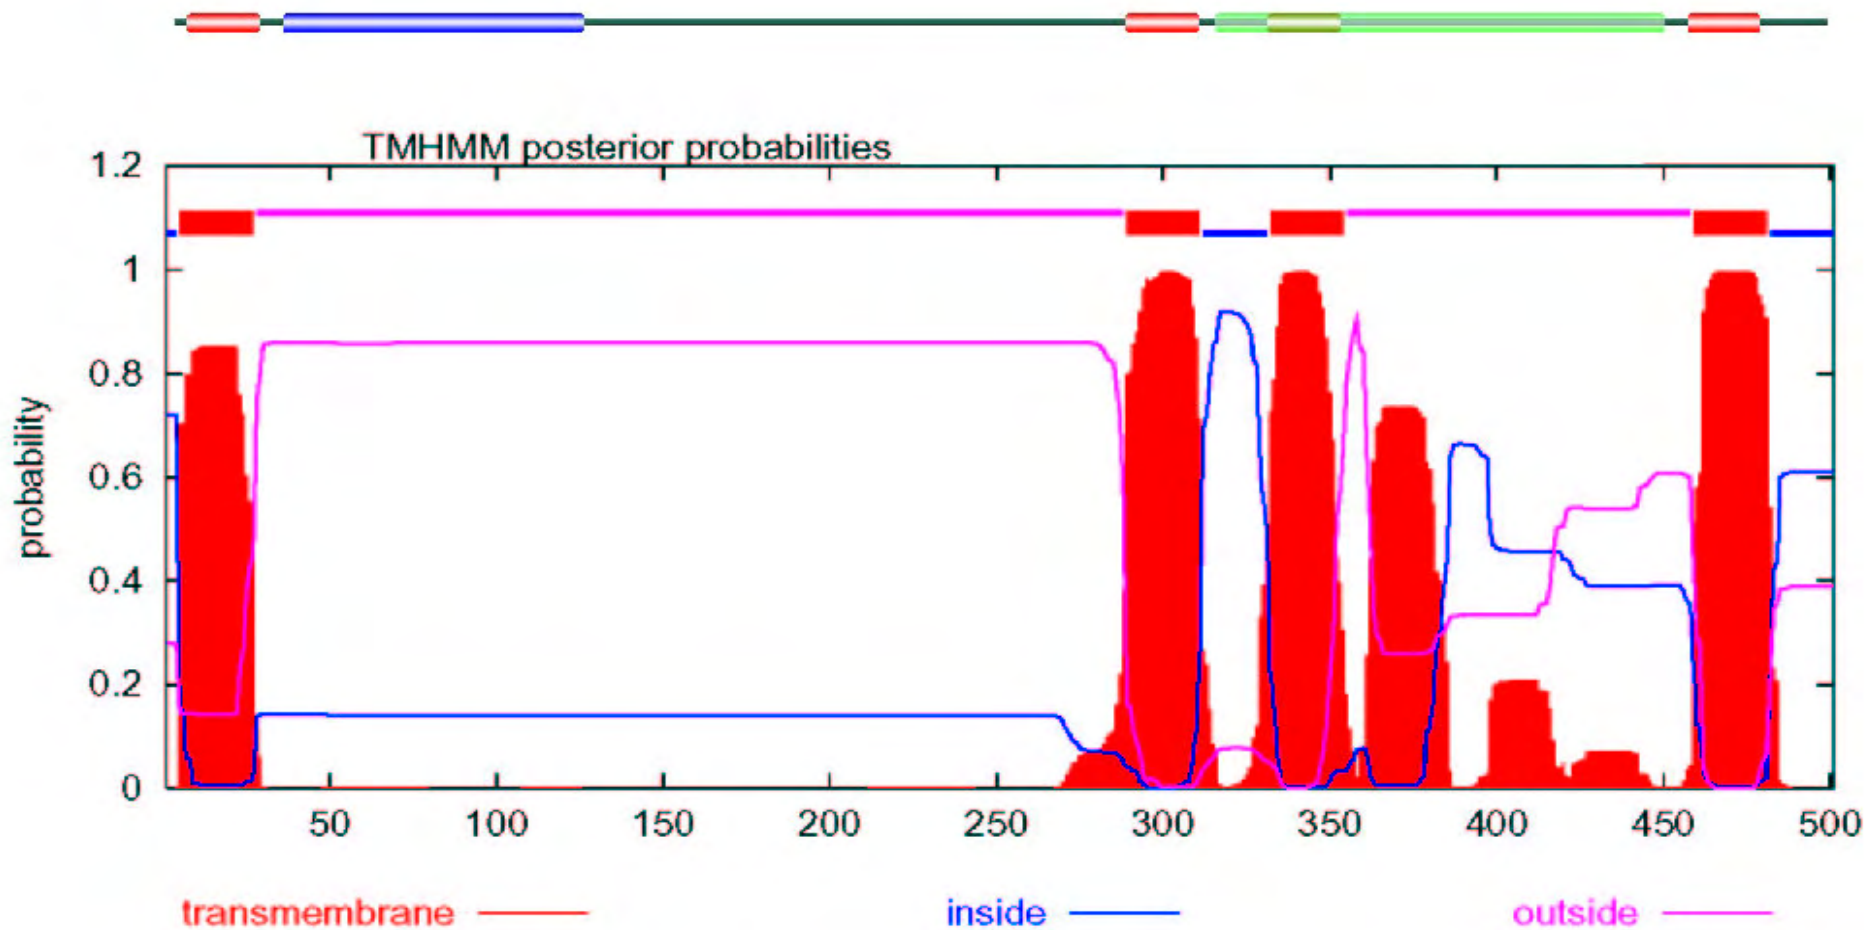

08

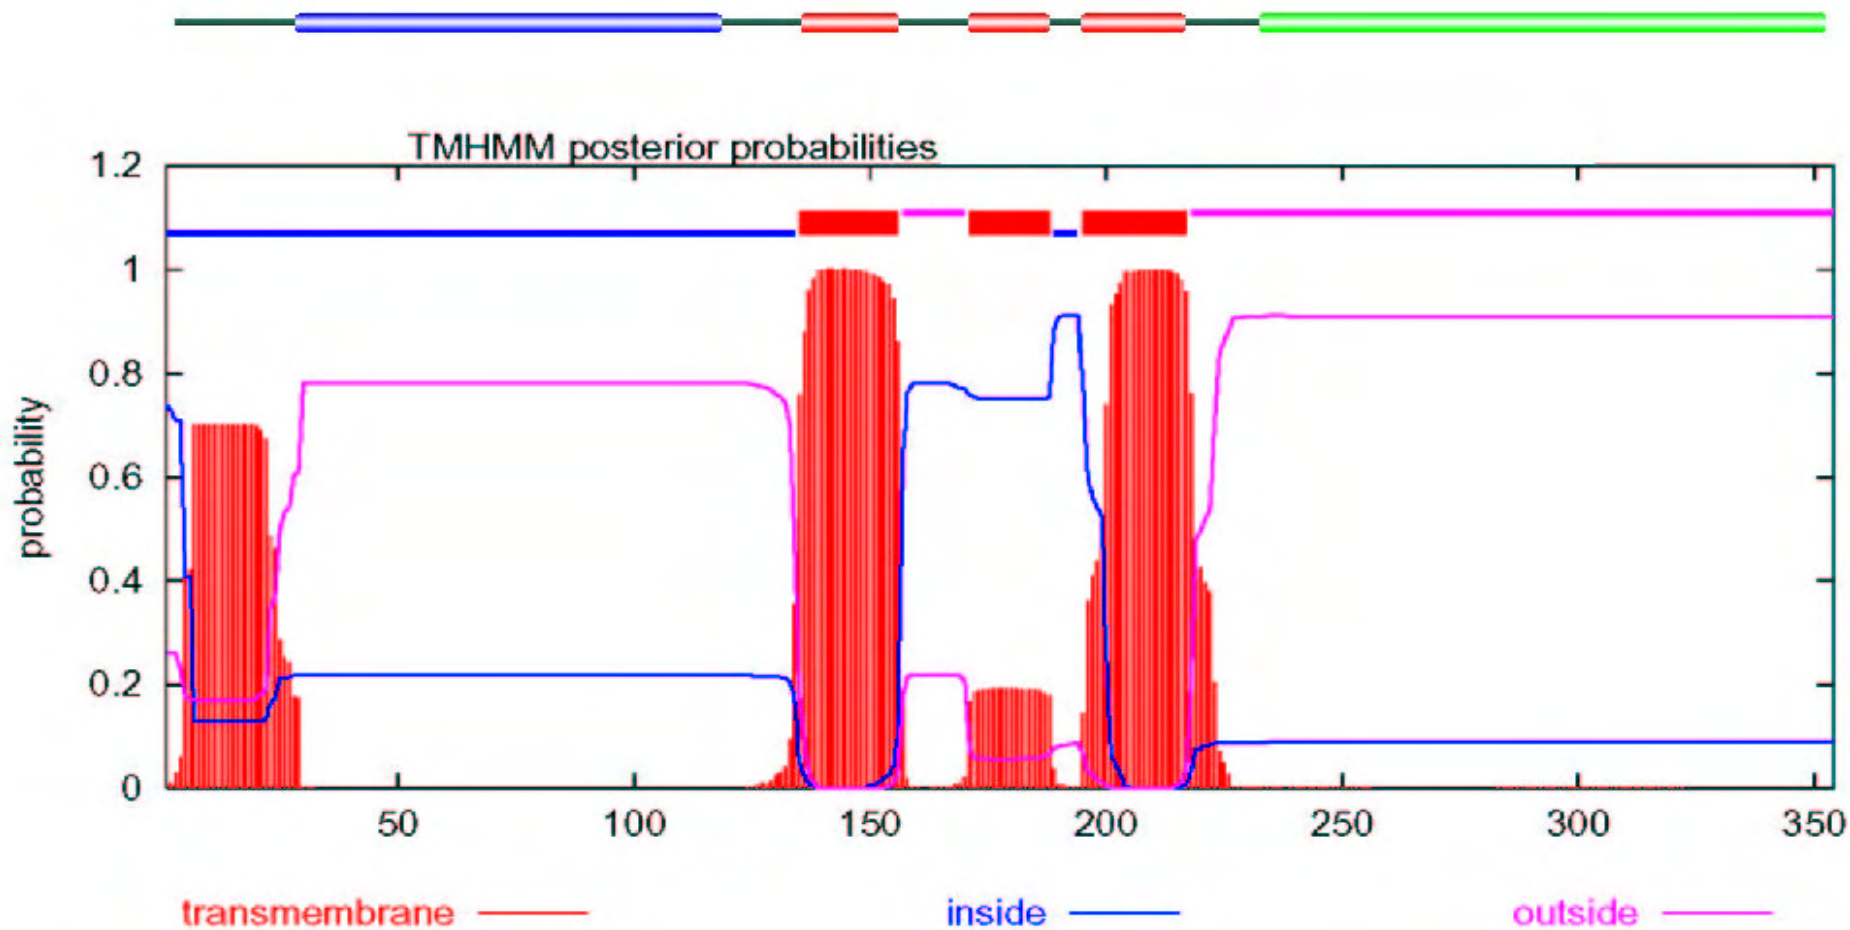

09

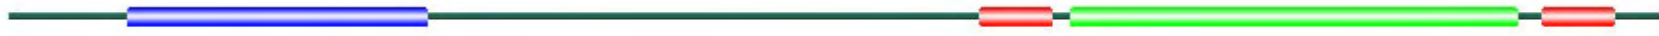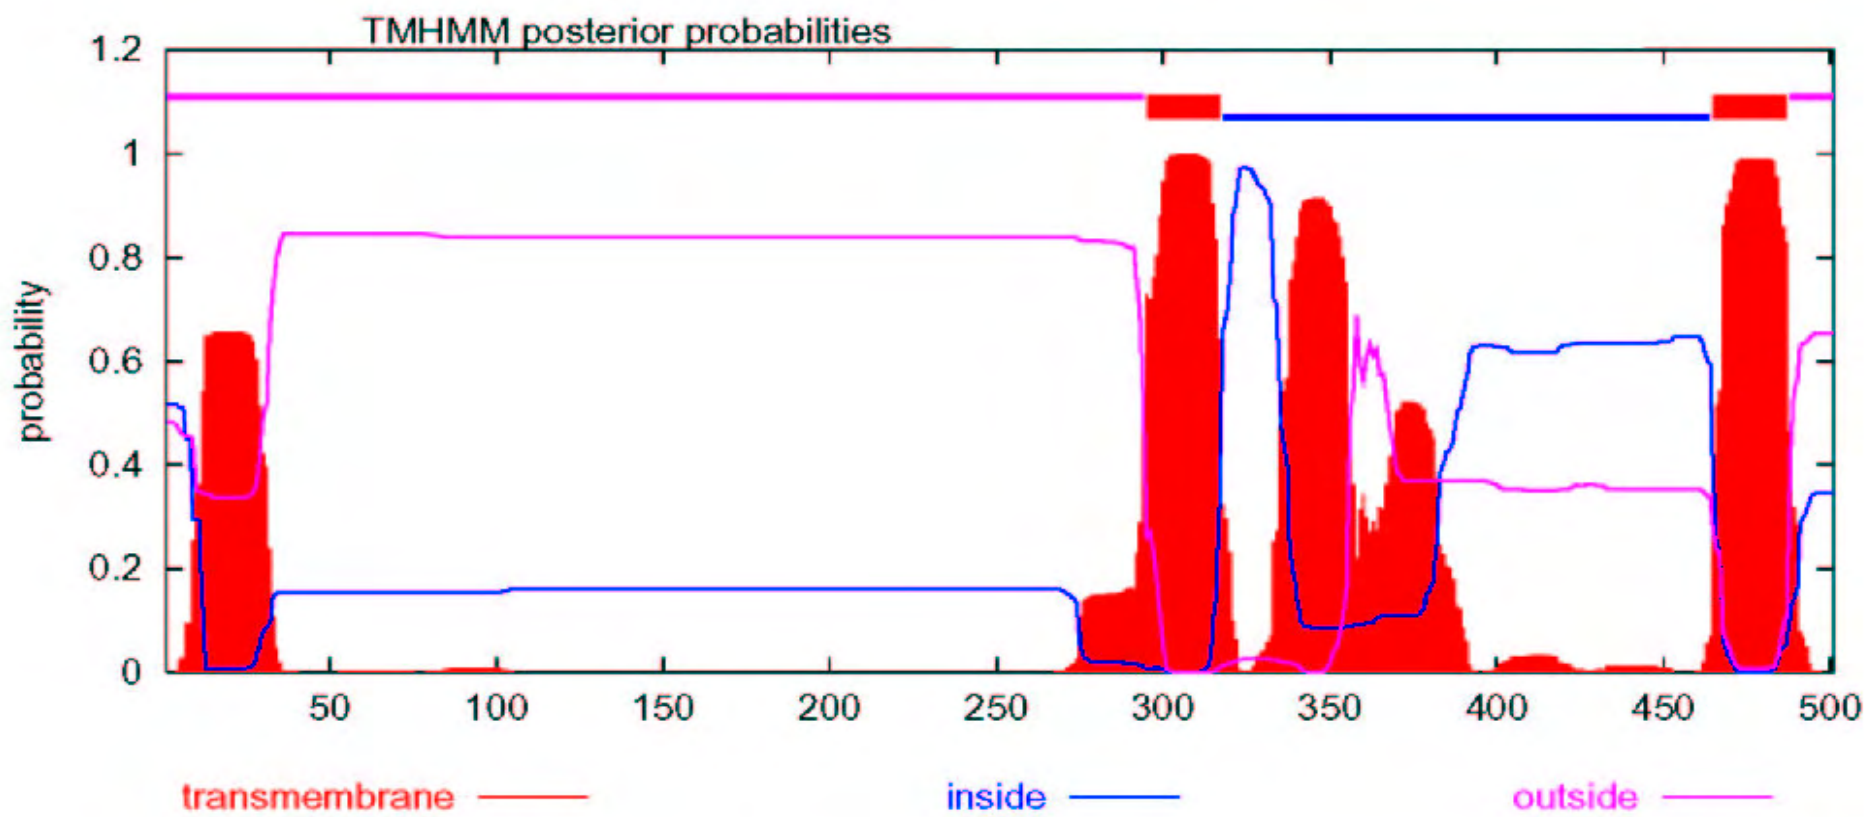

10



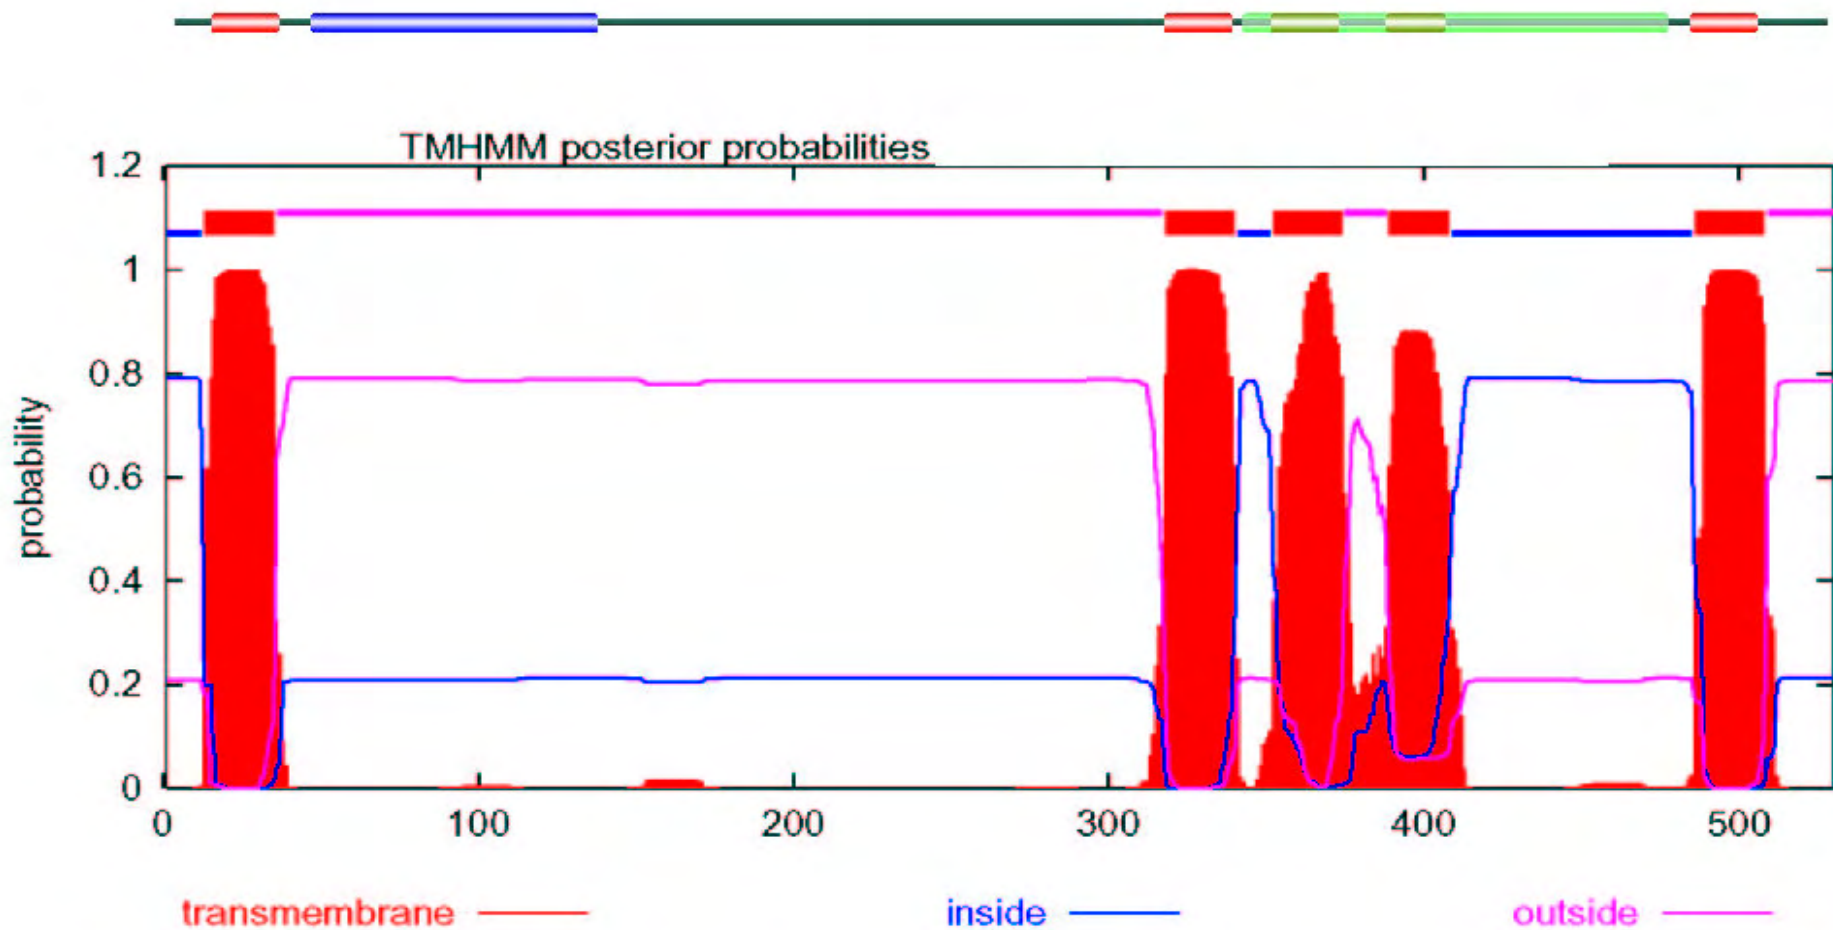



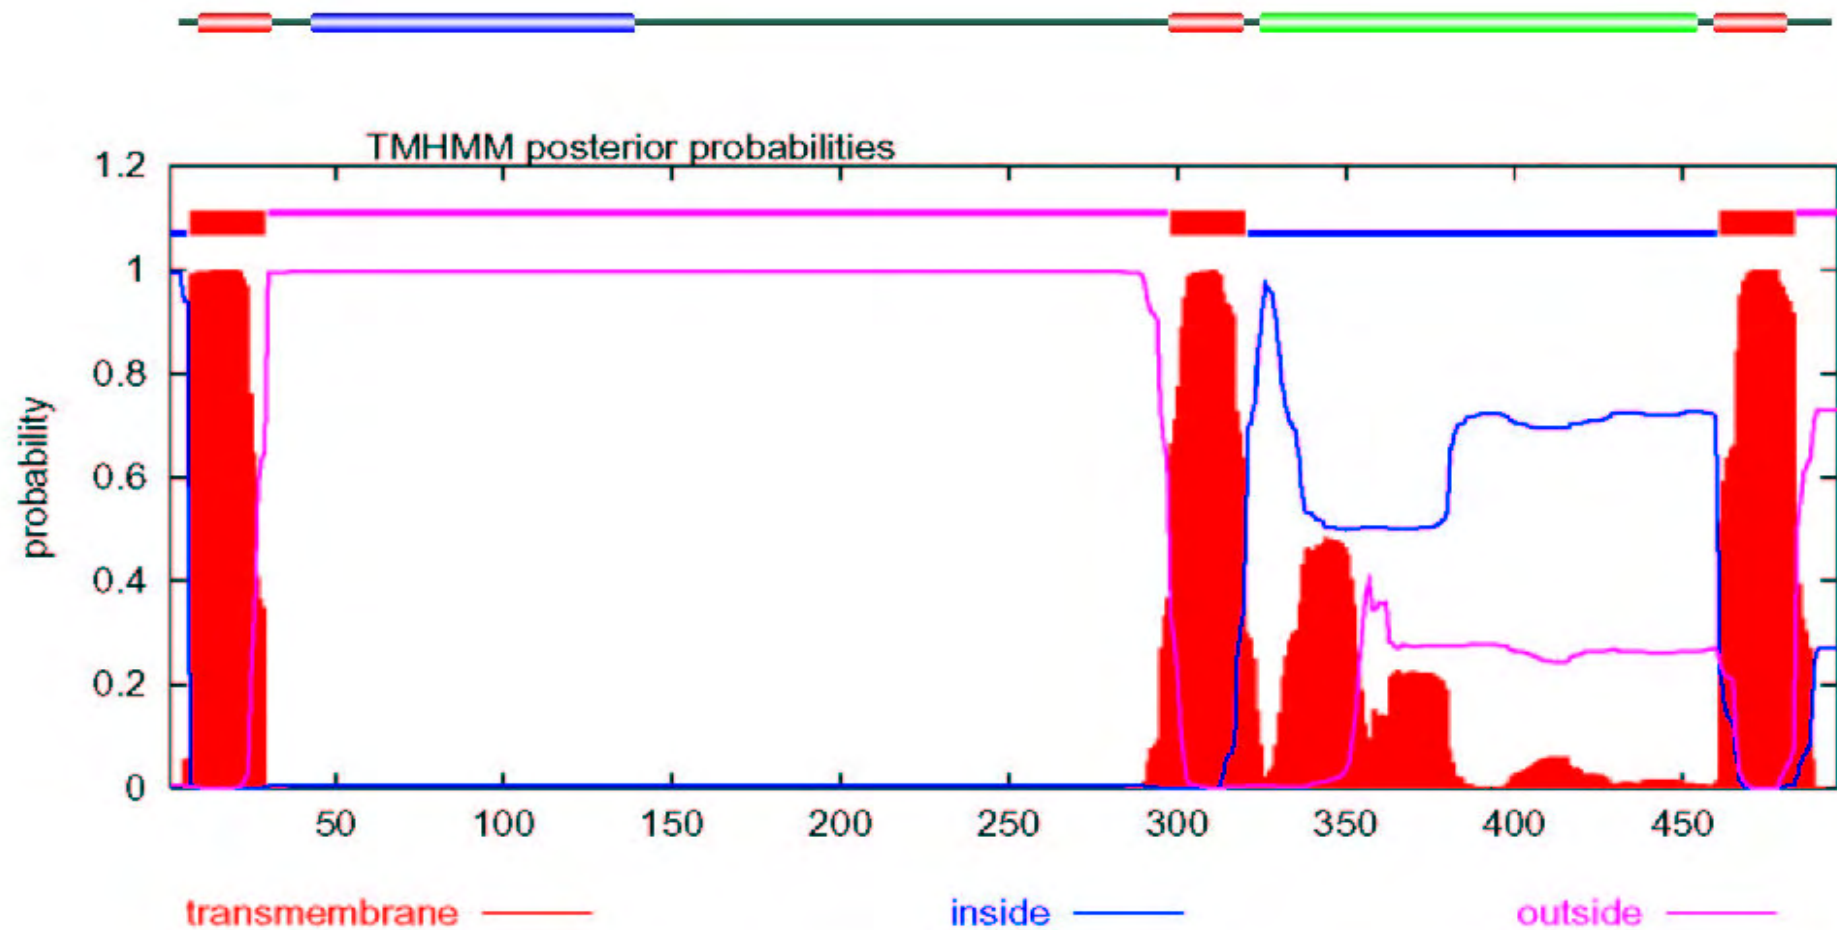

12

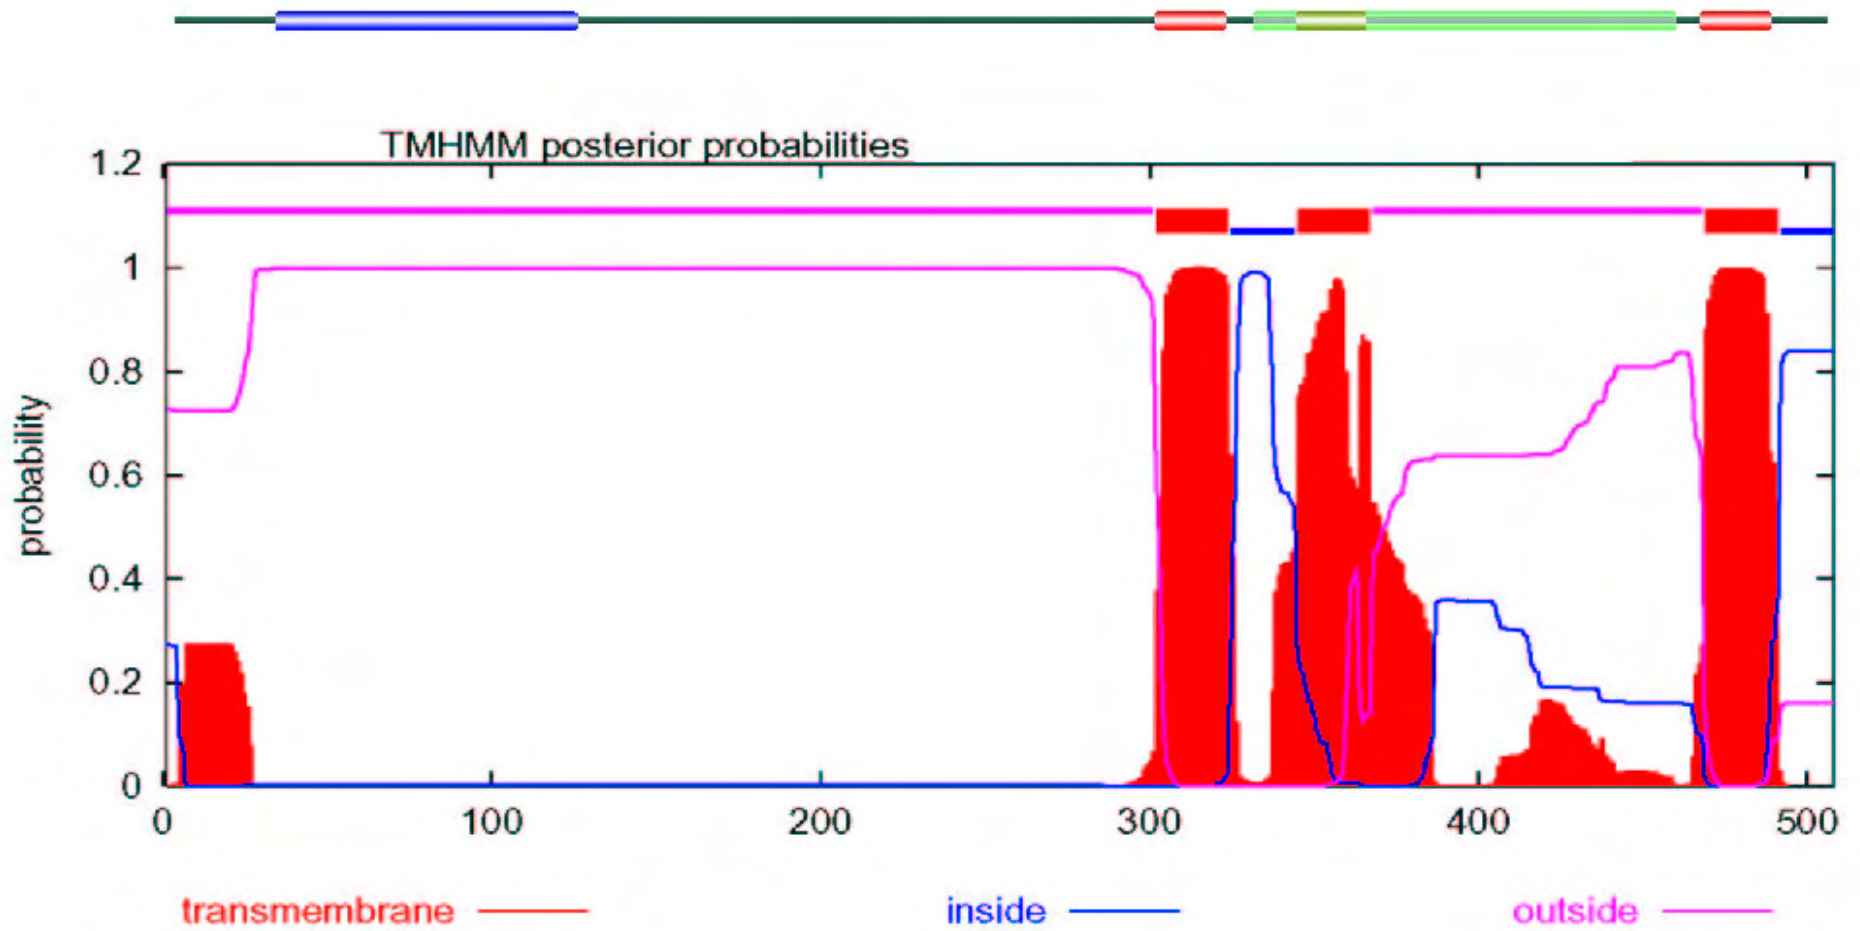

13

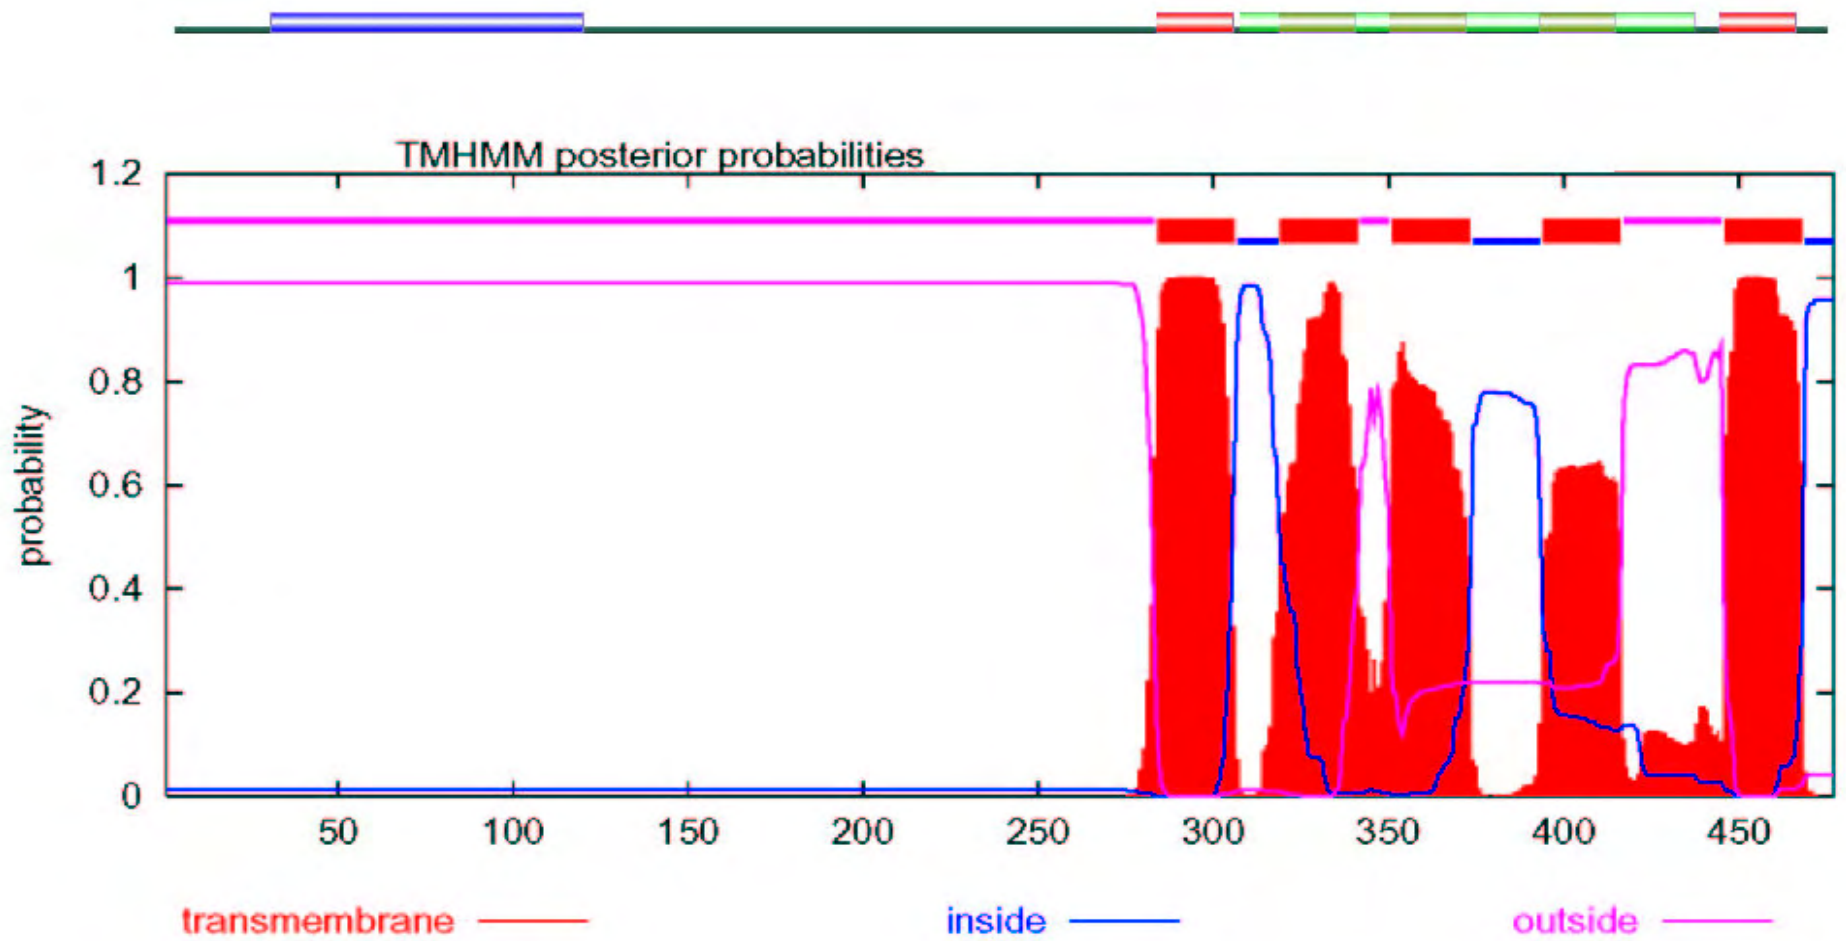

14

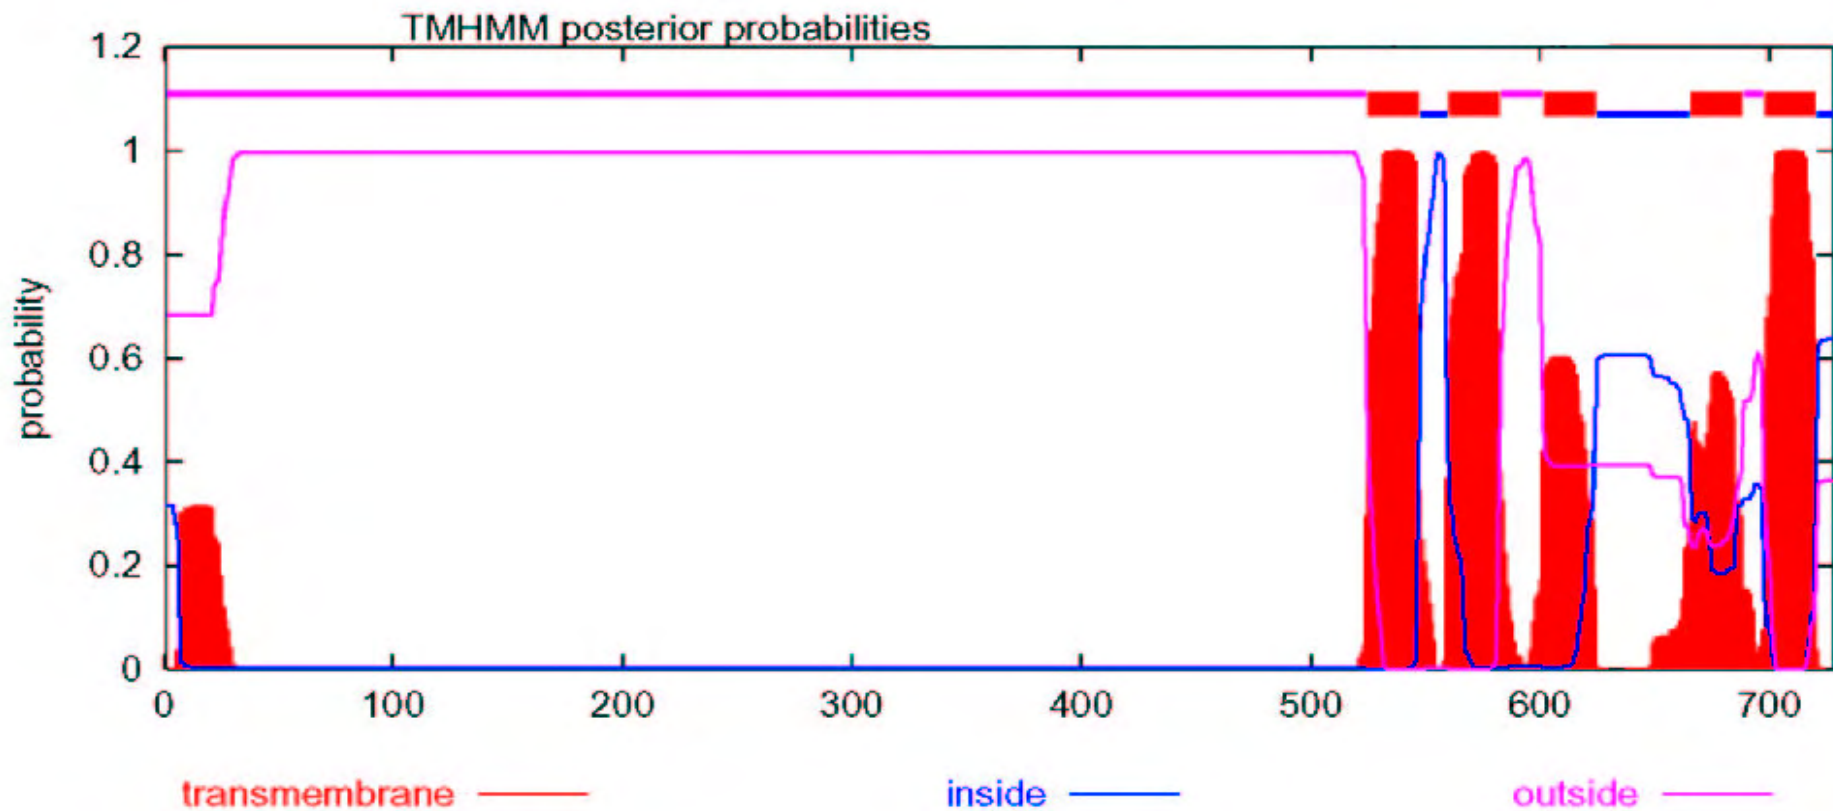

15

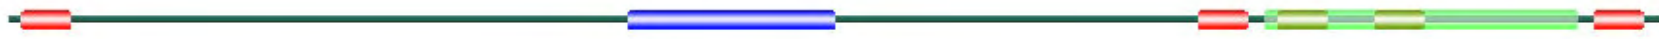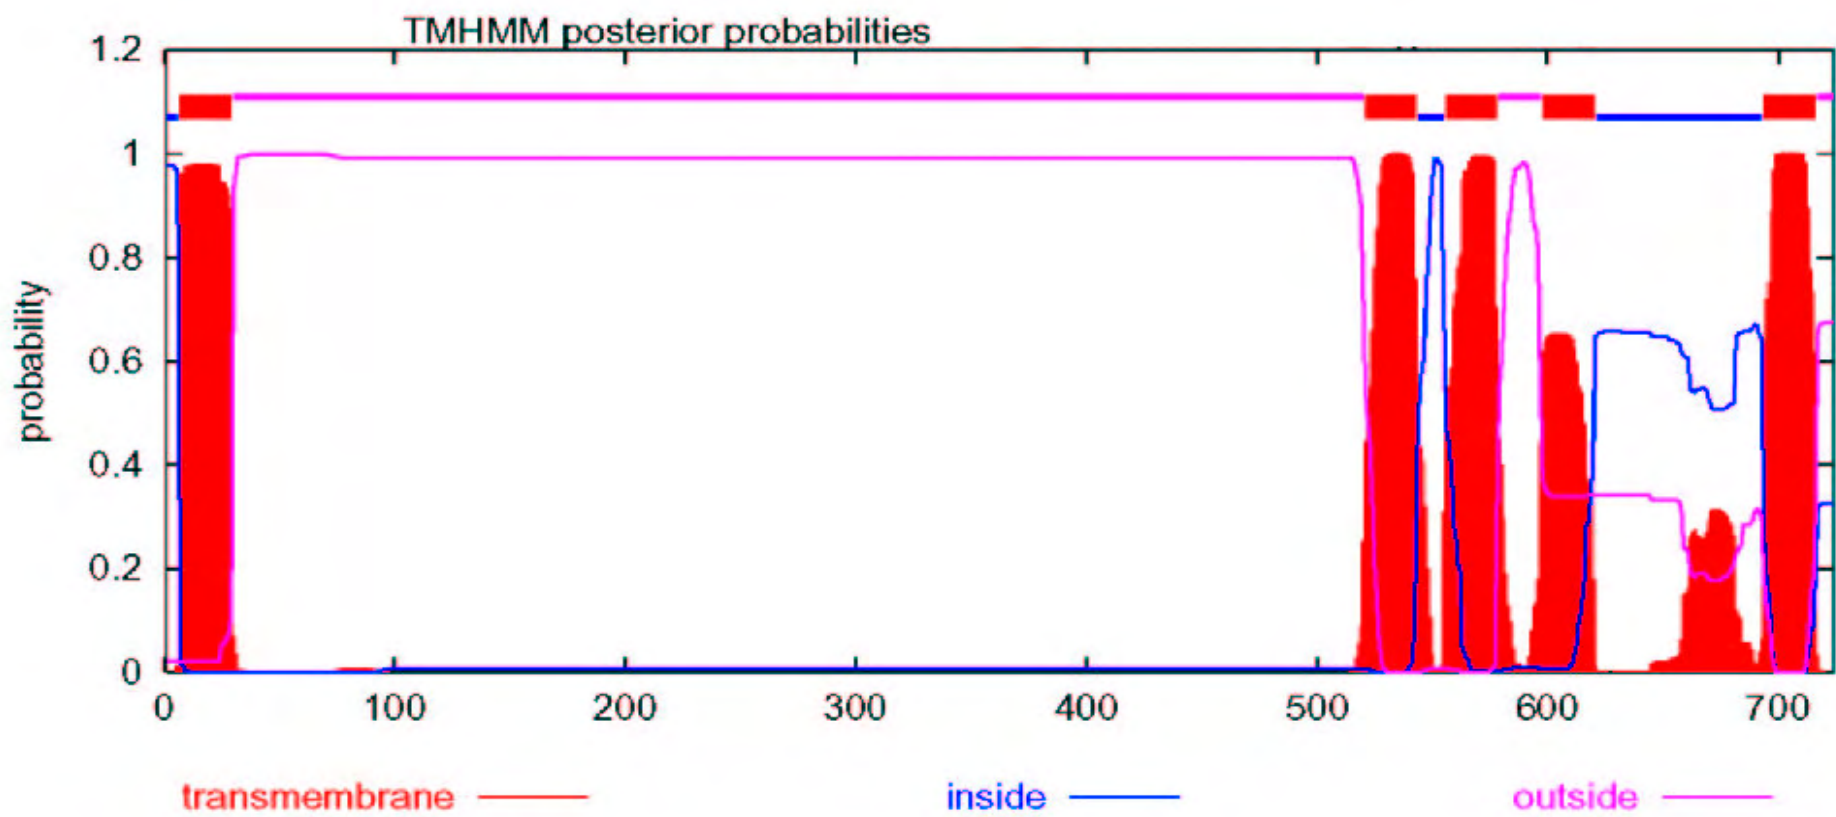

16

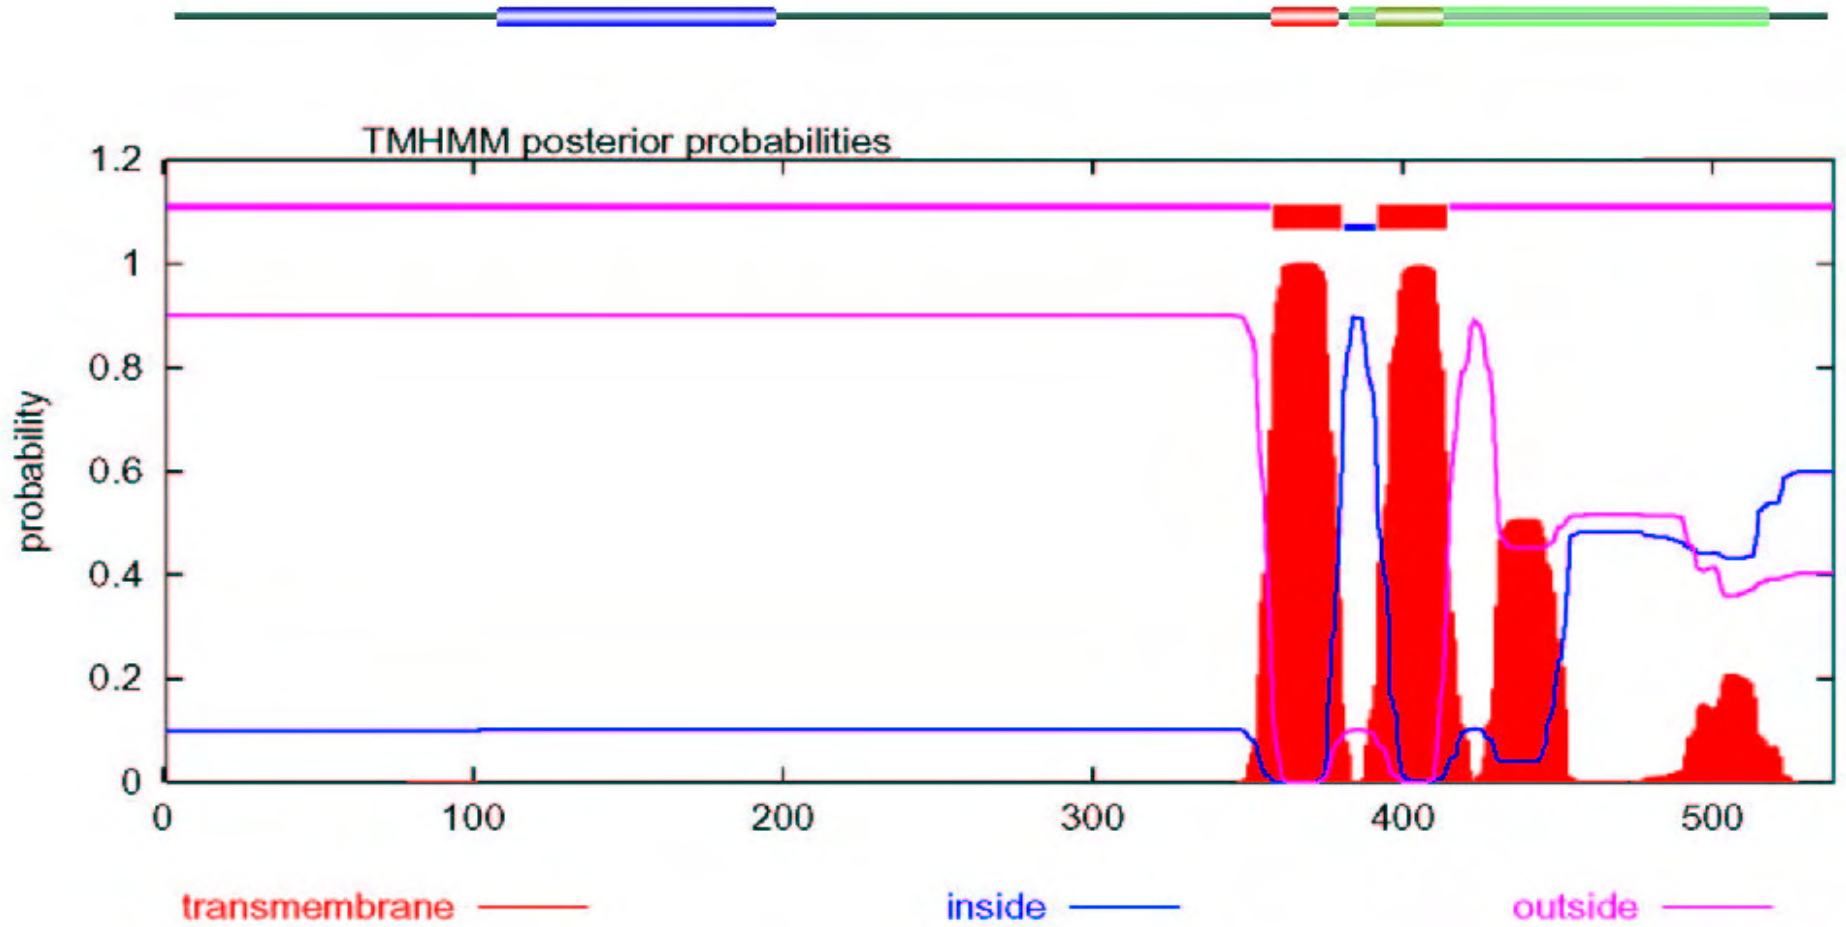

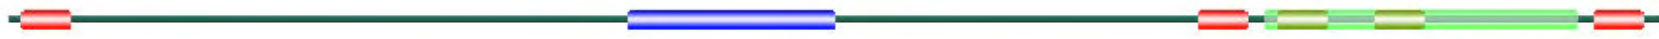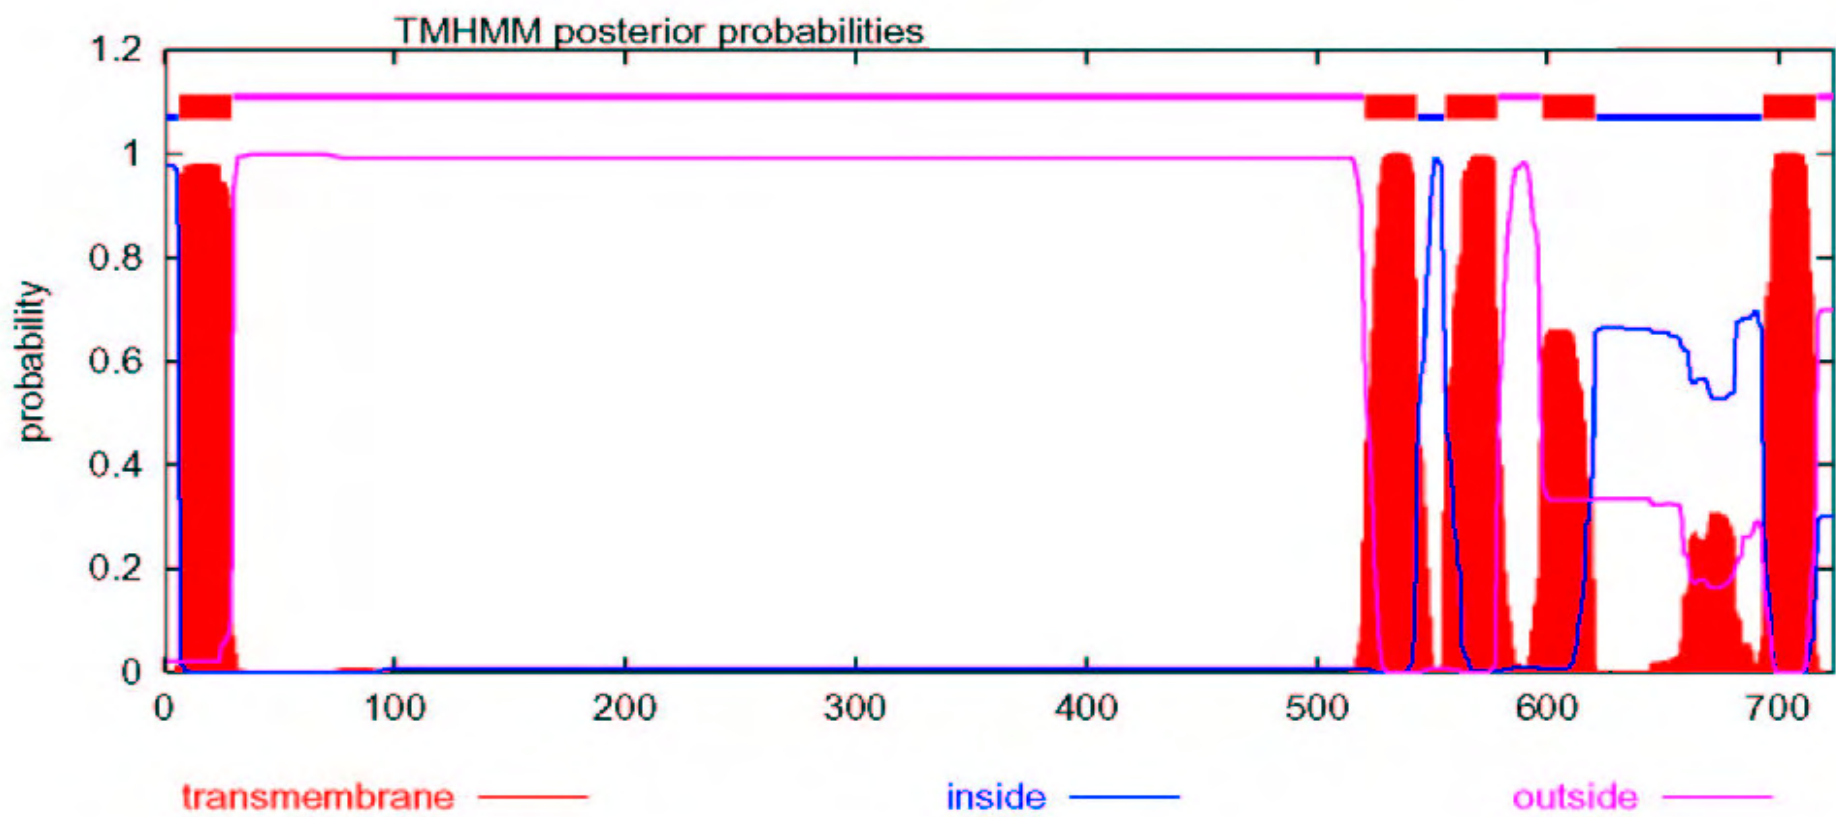

18



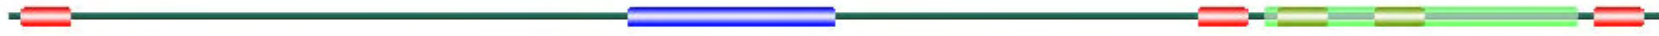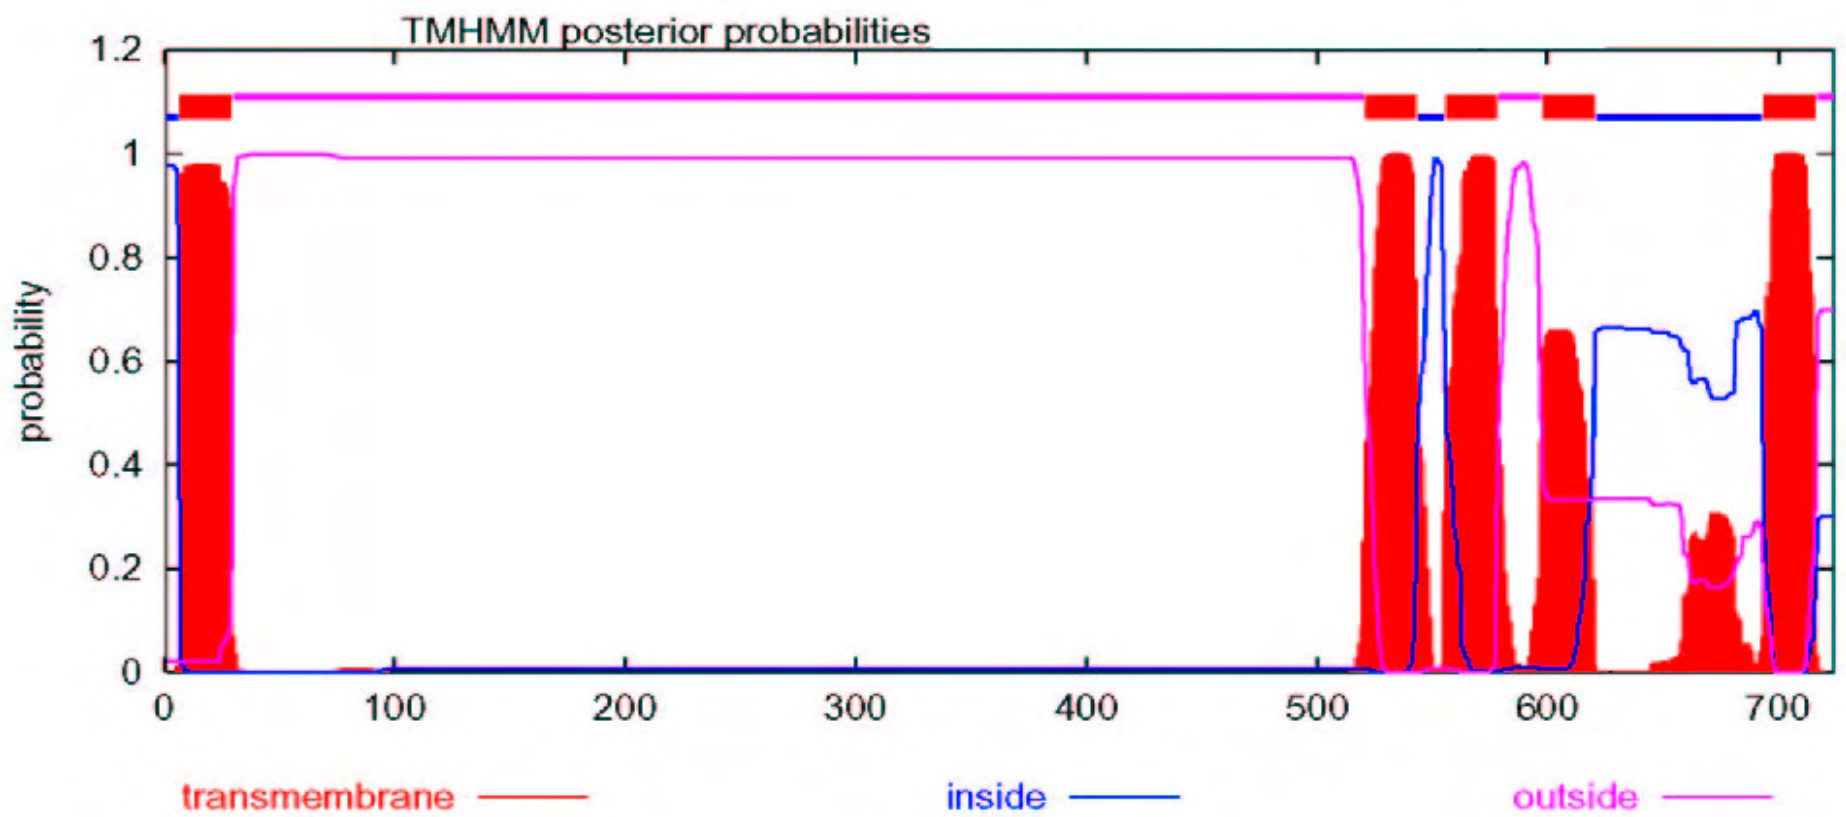

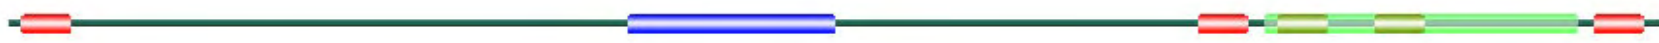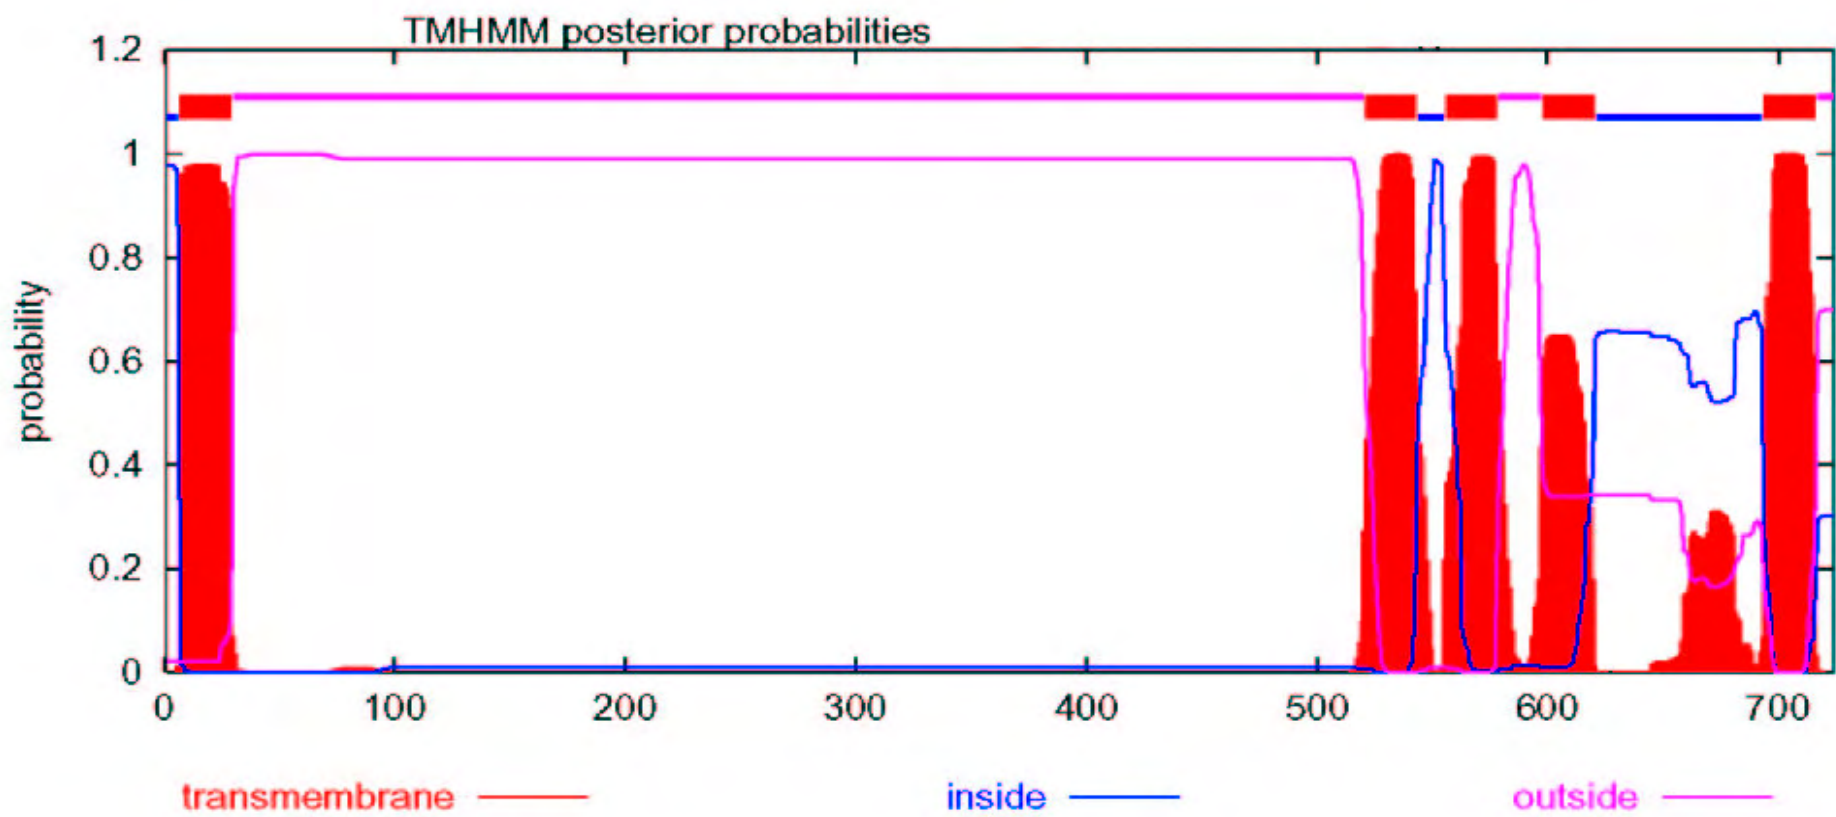

20

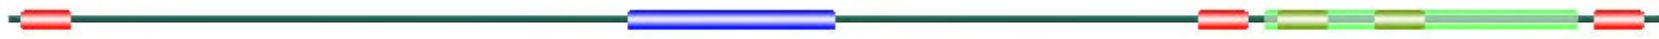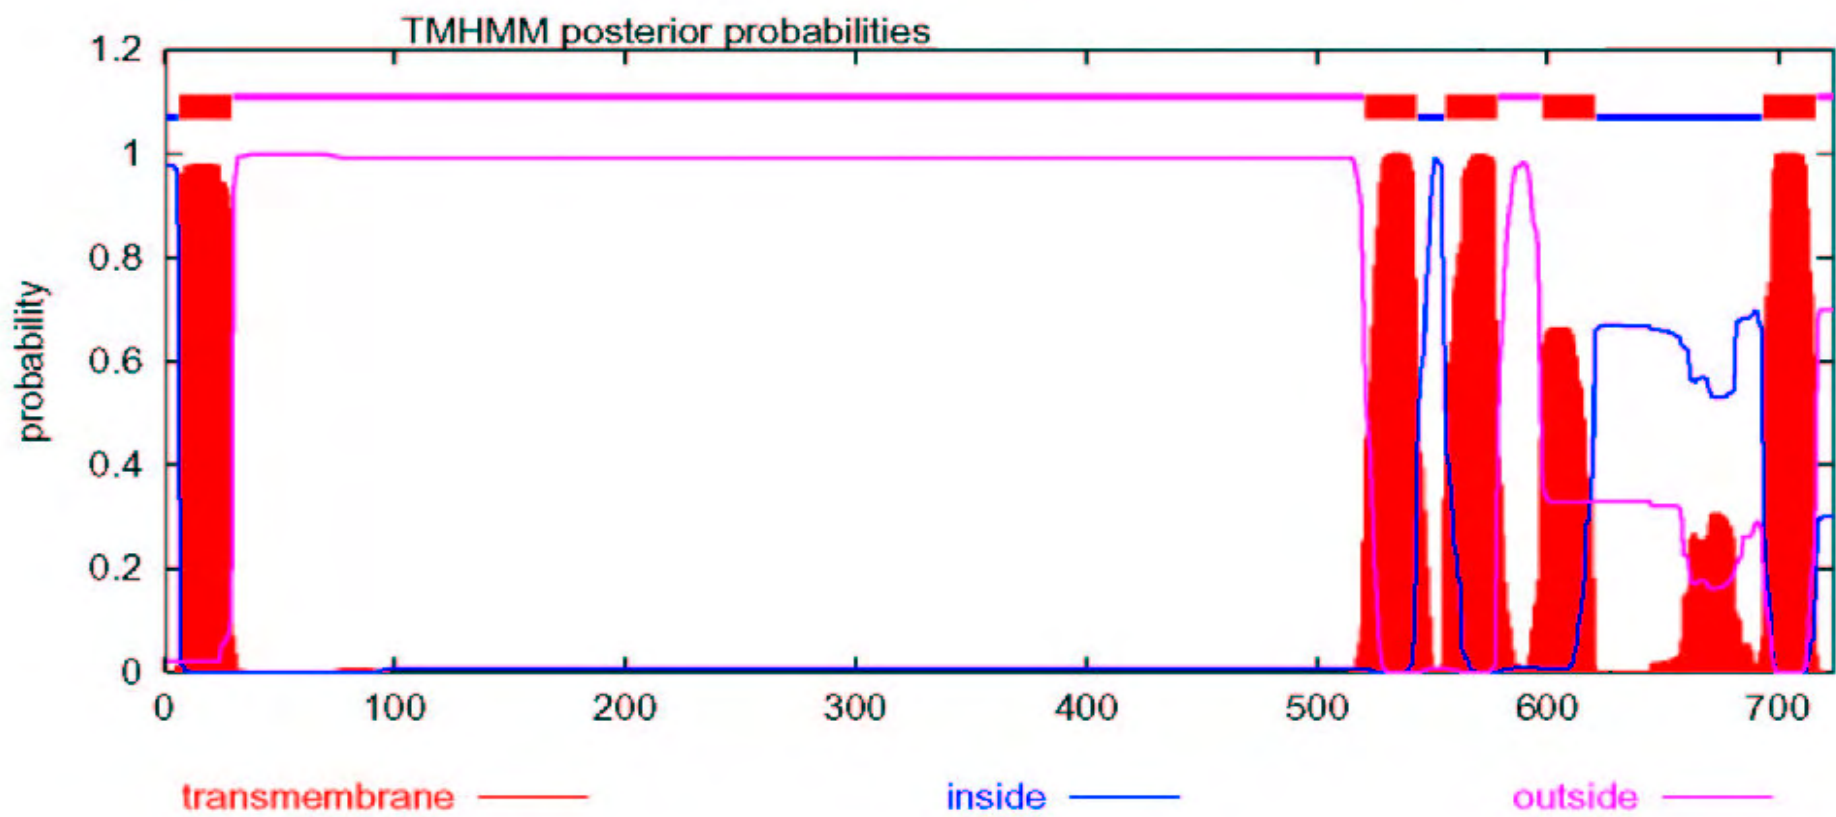

21

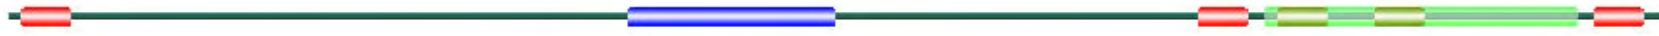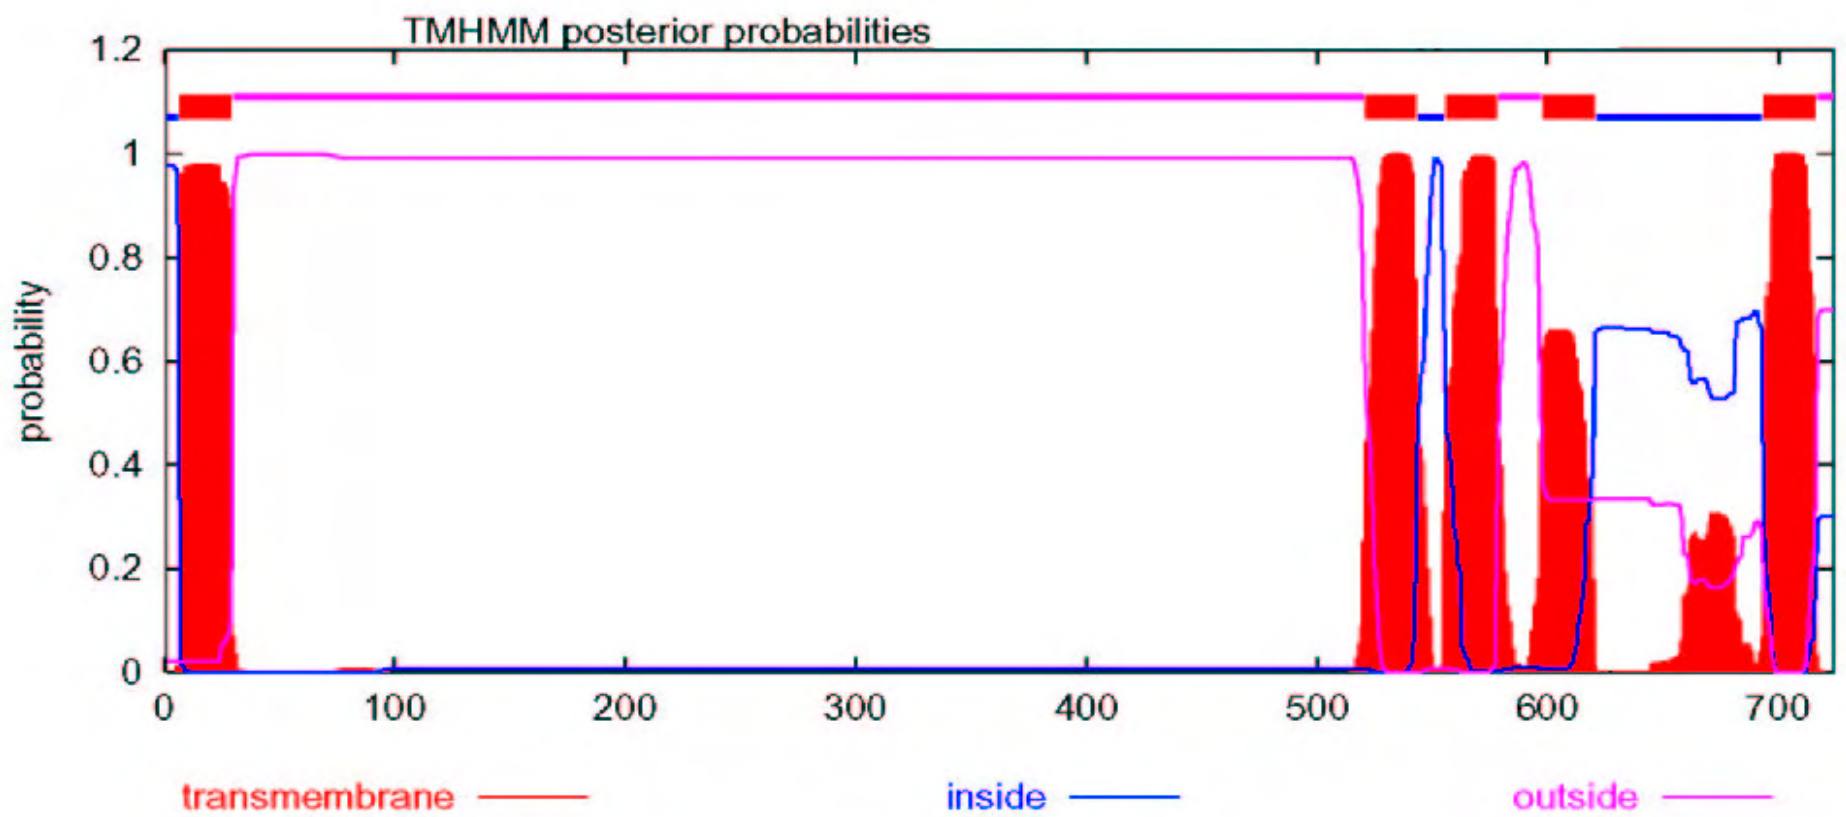

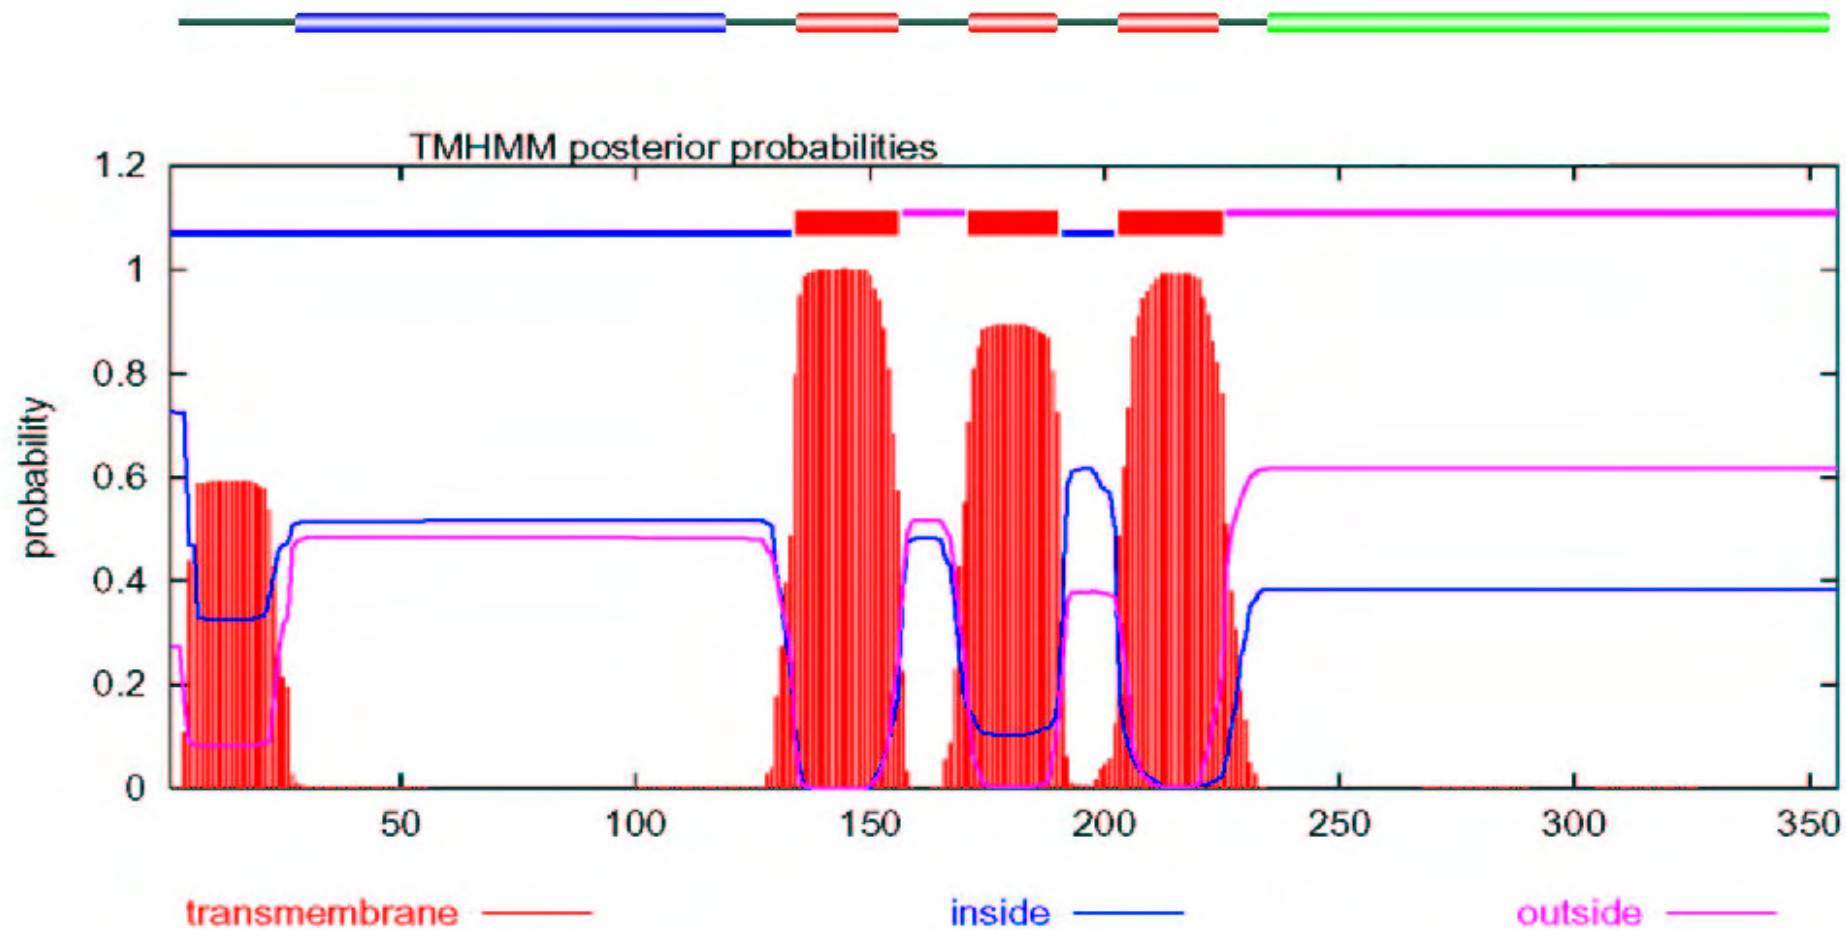

23

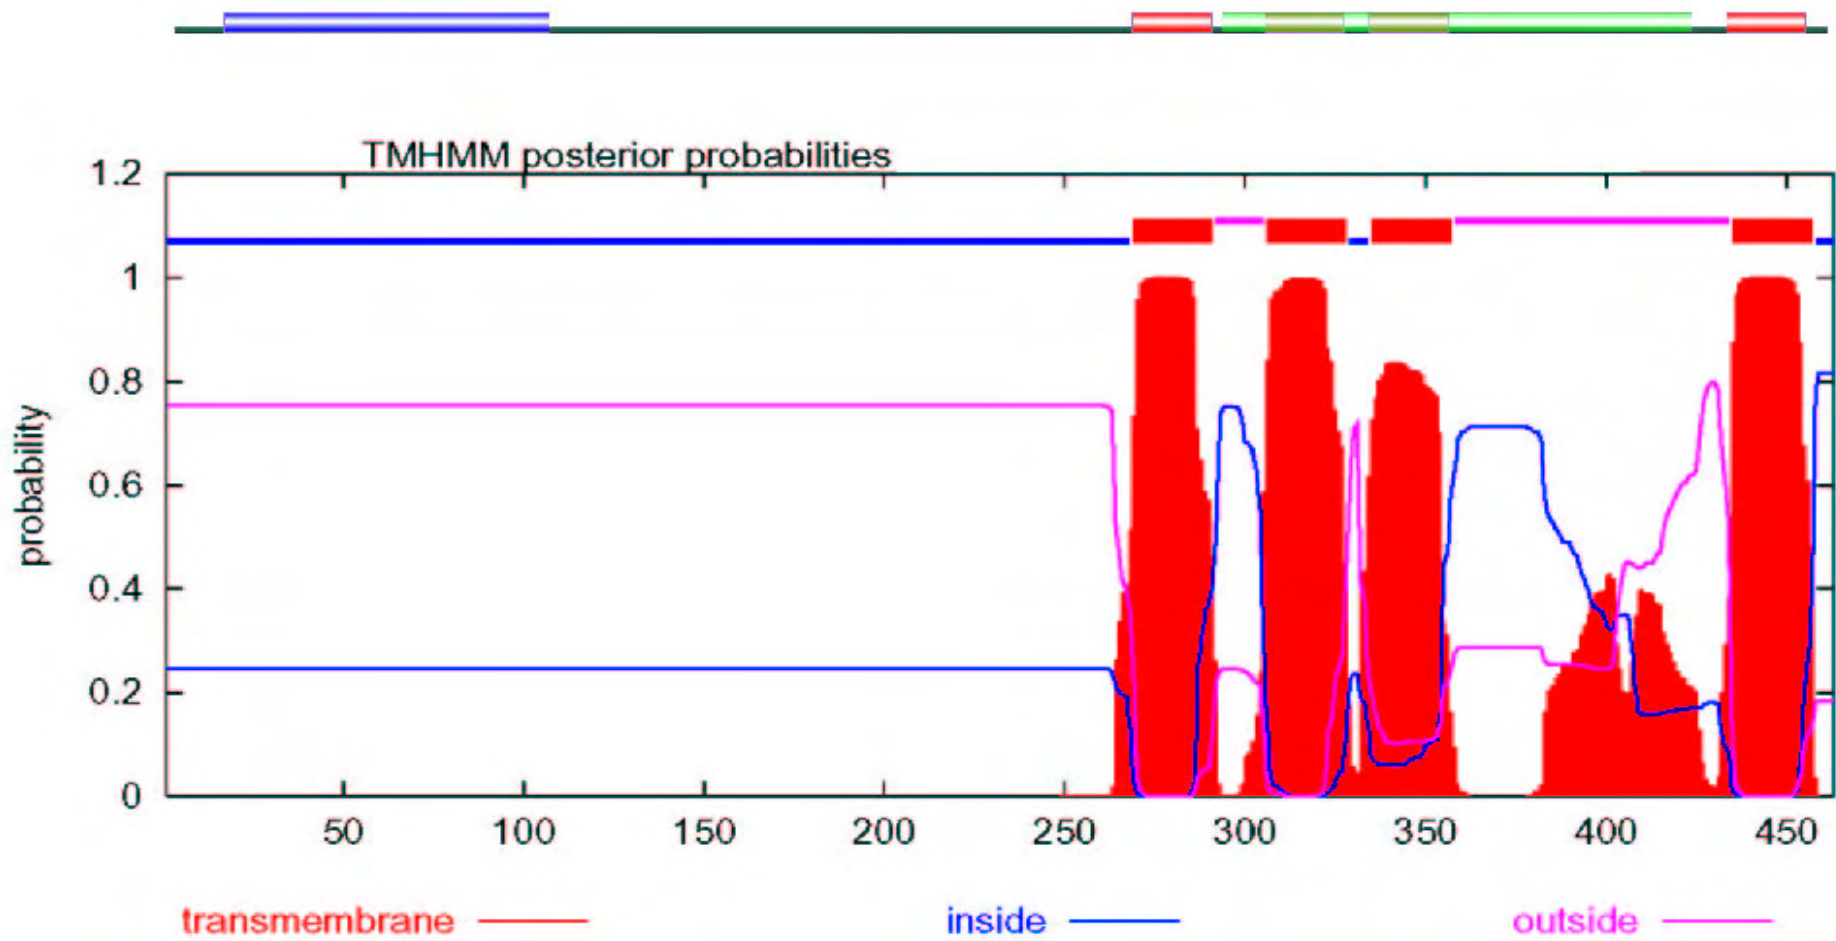

24



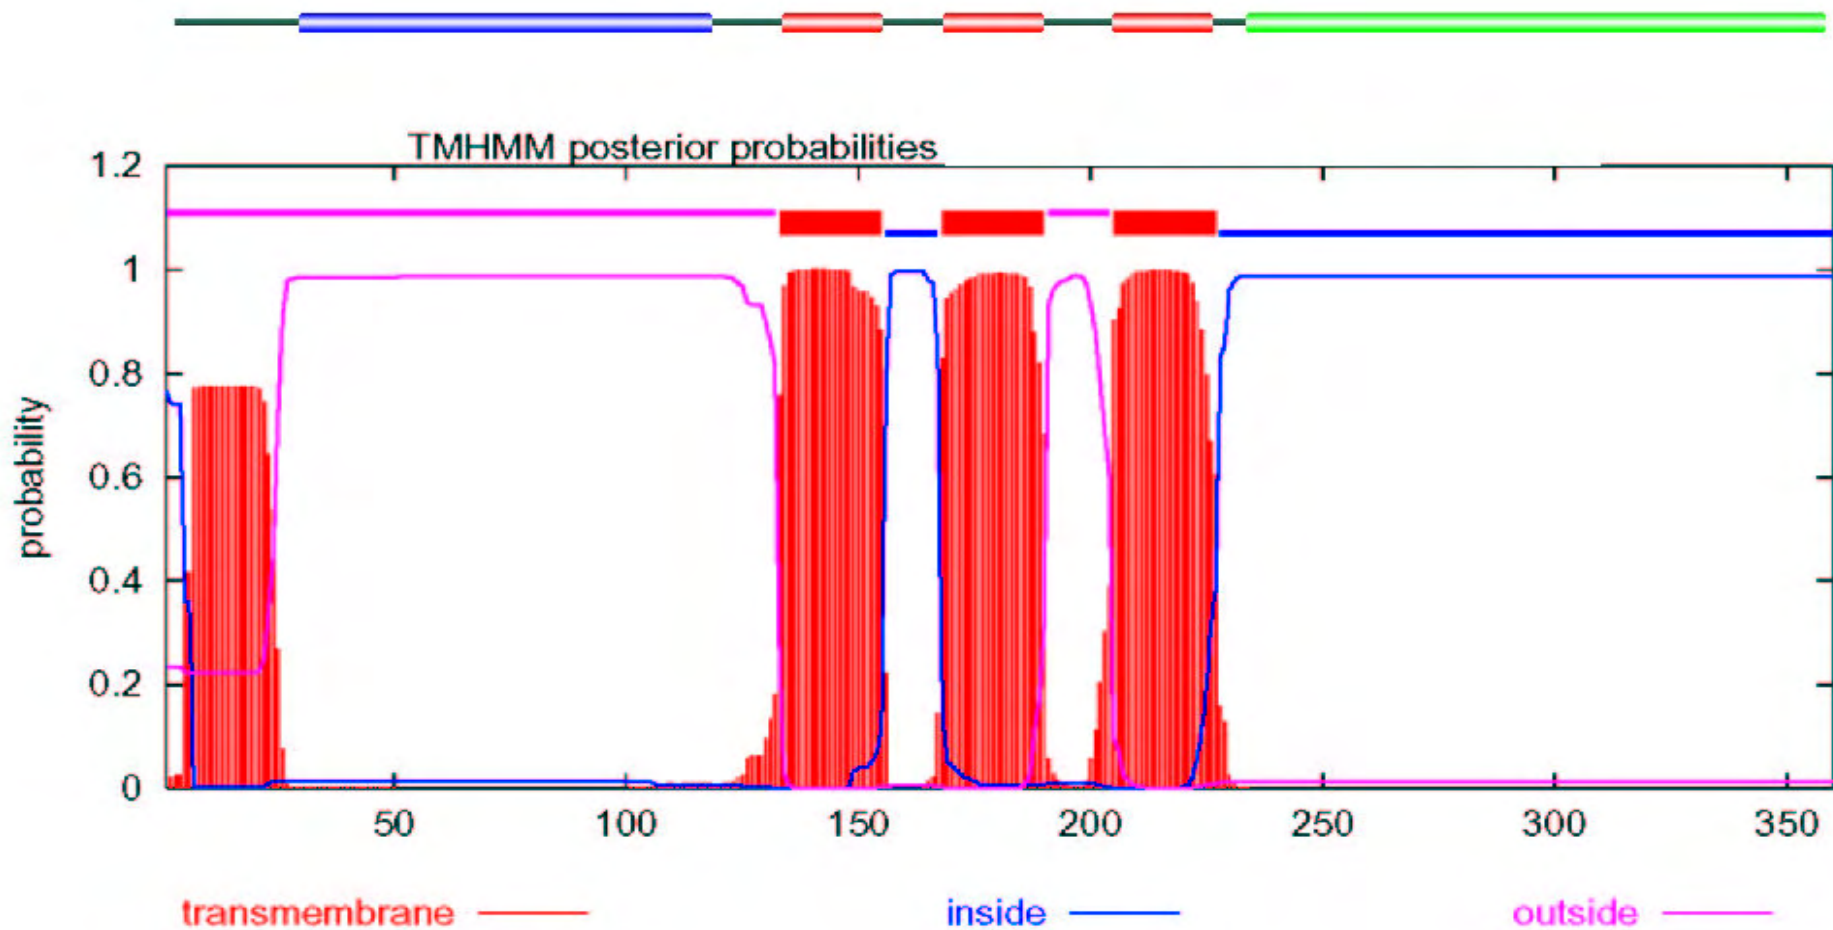

25



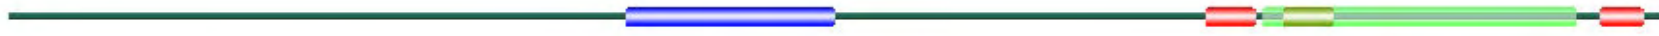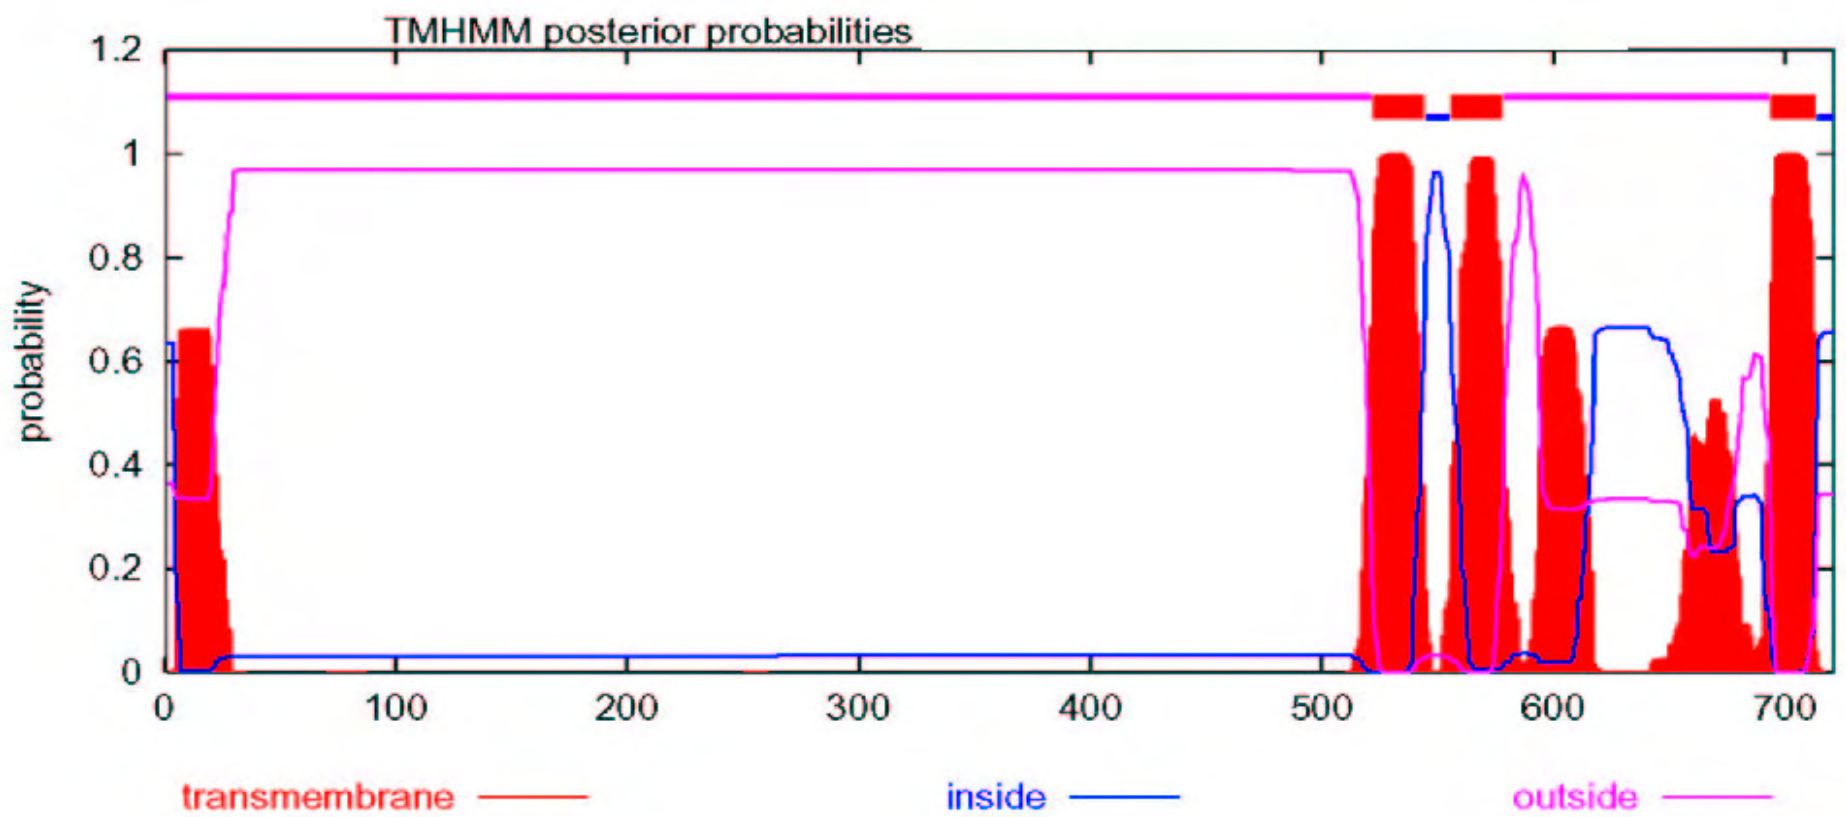

26

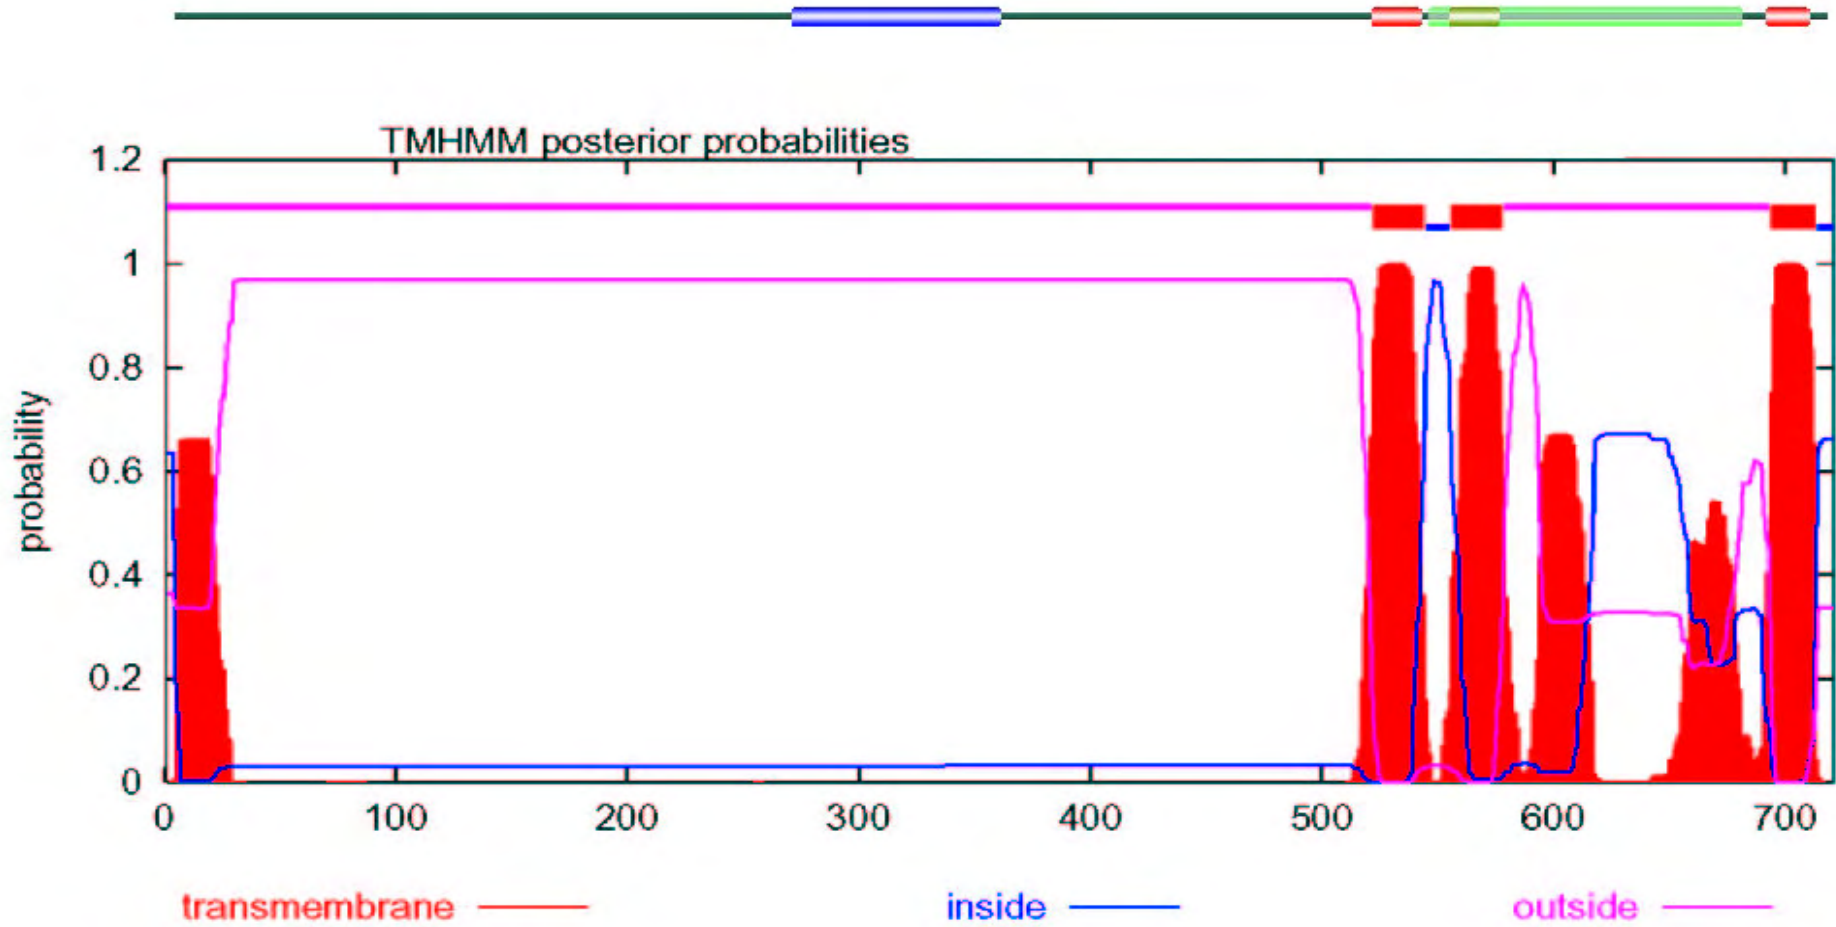

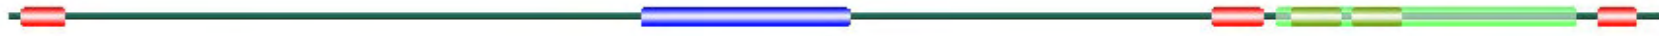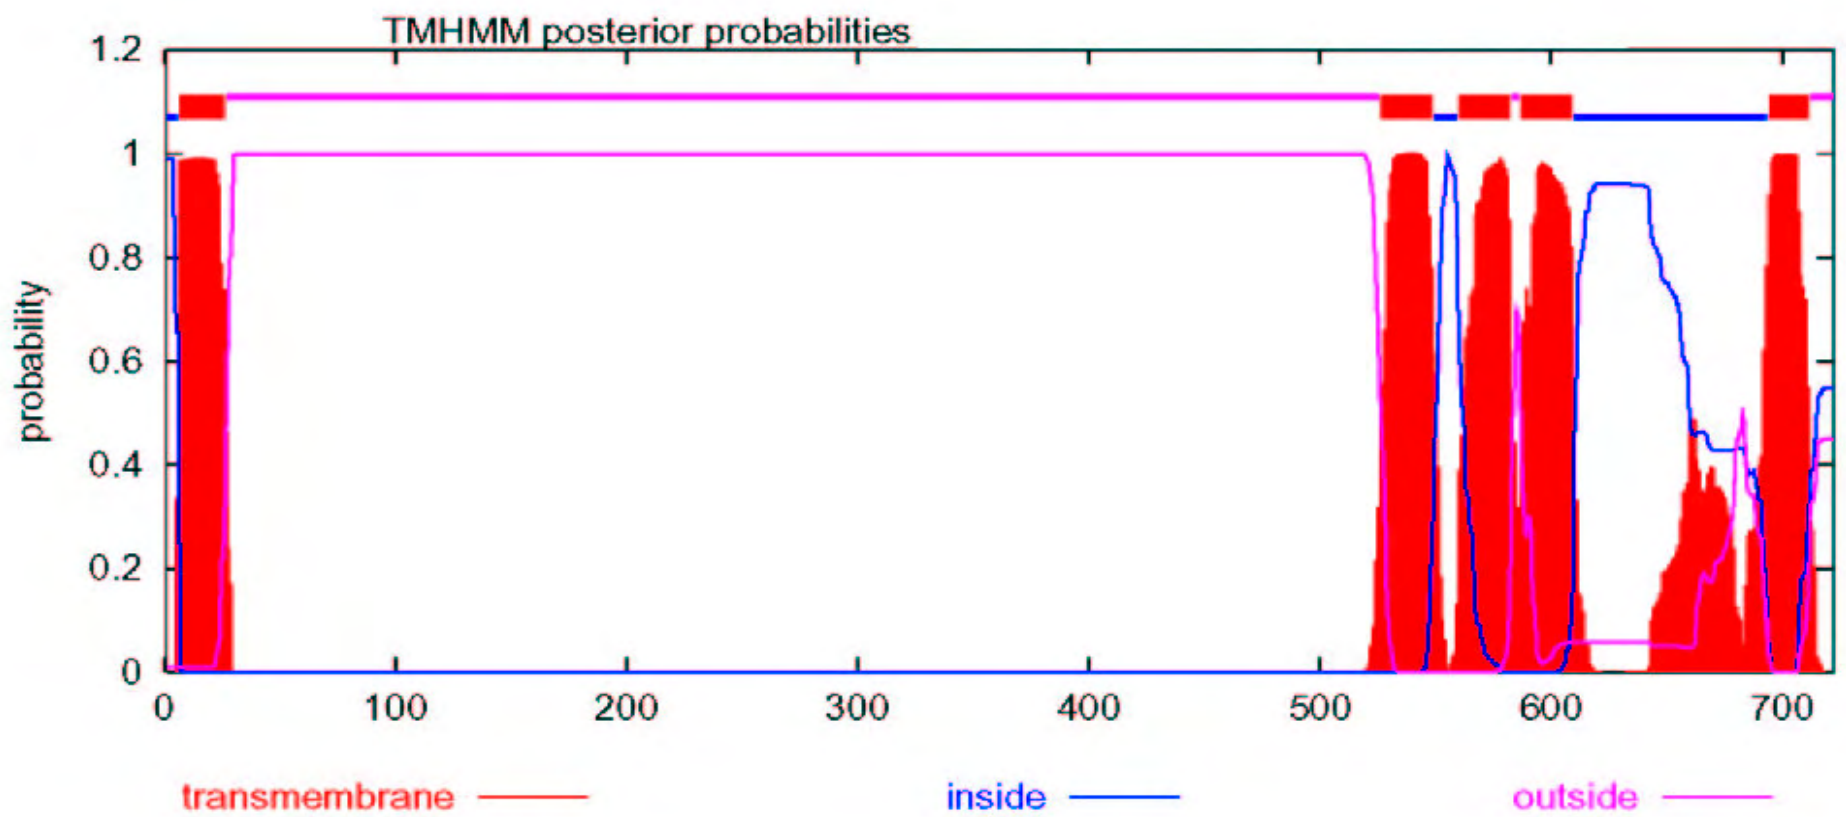

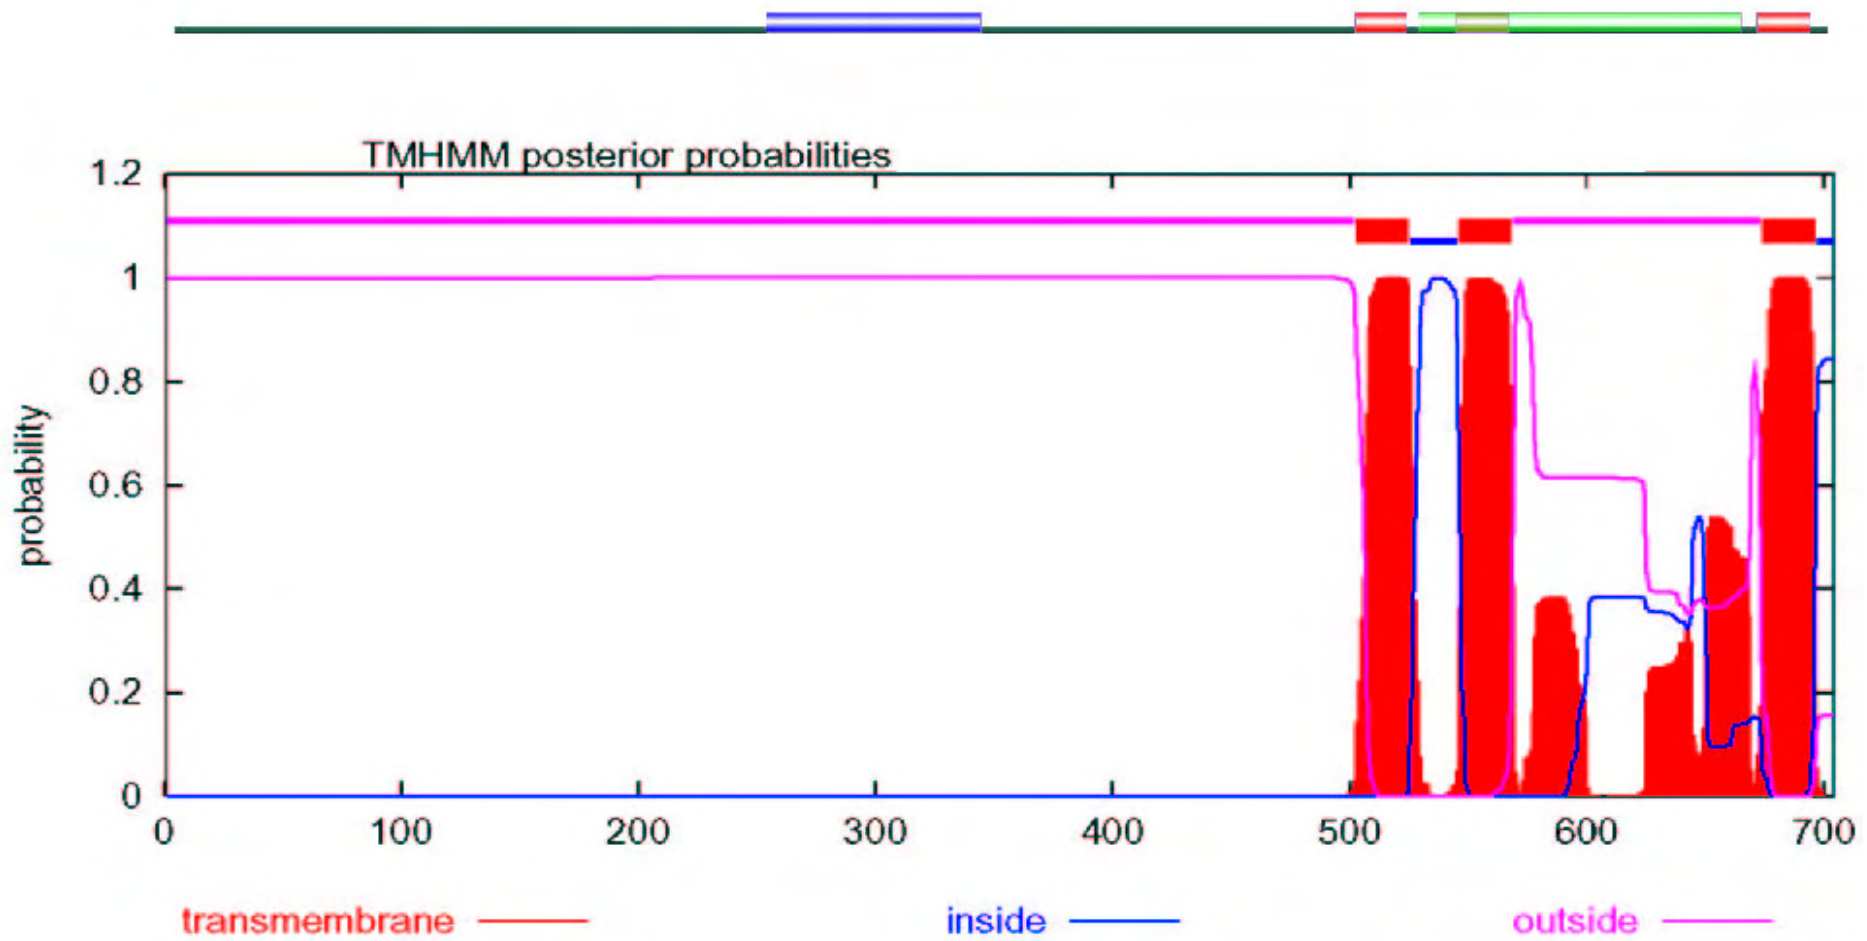

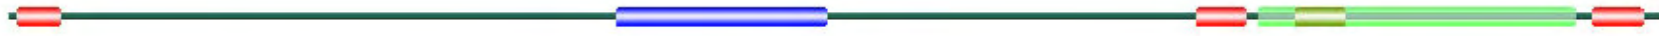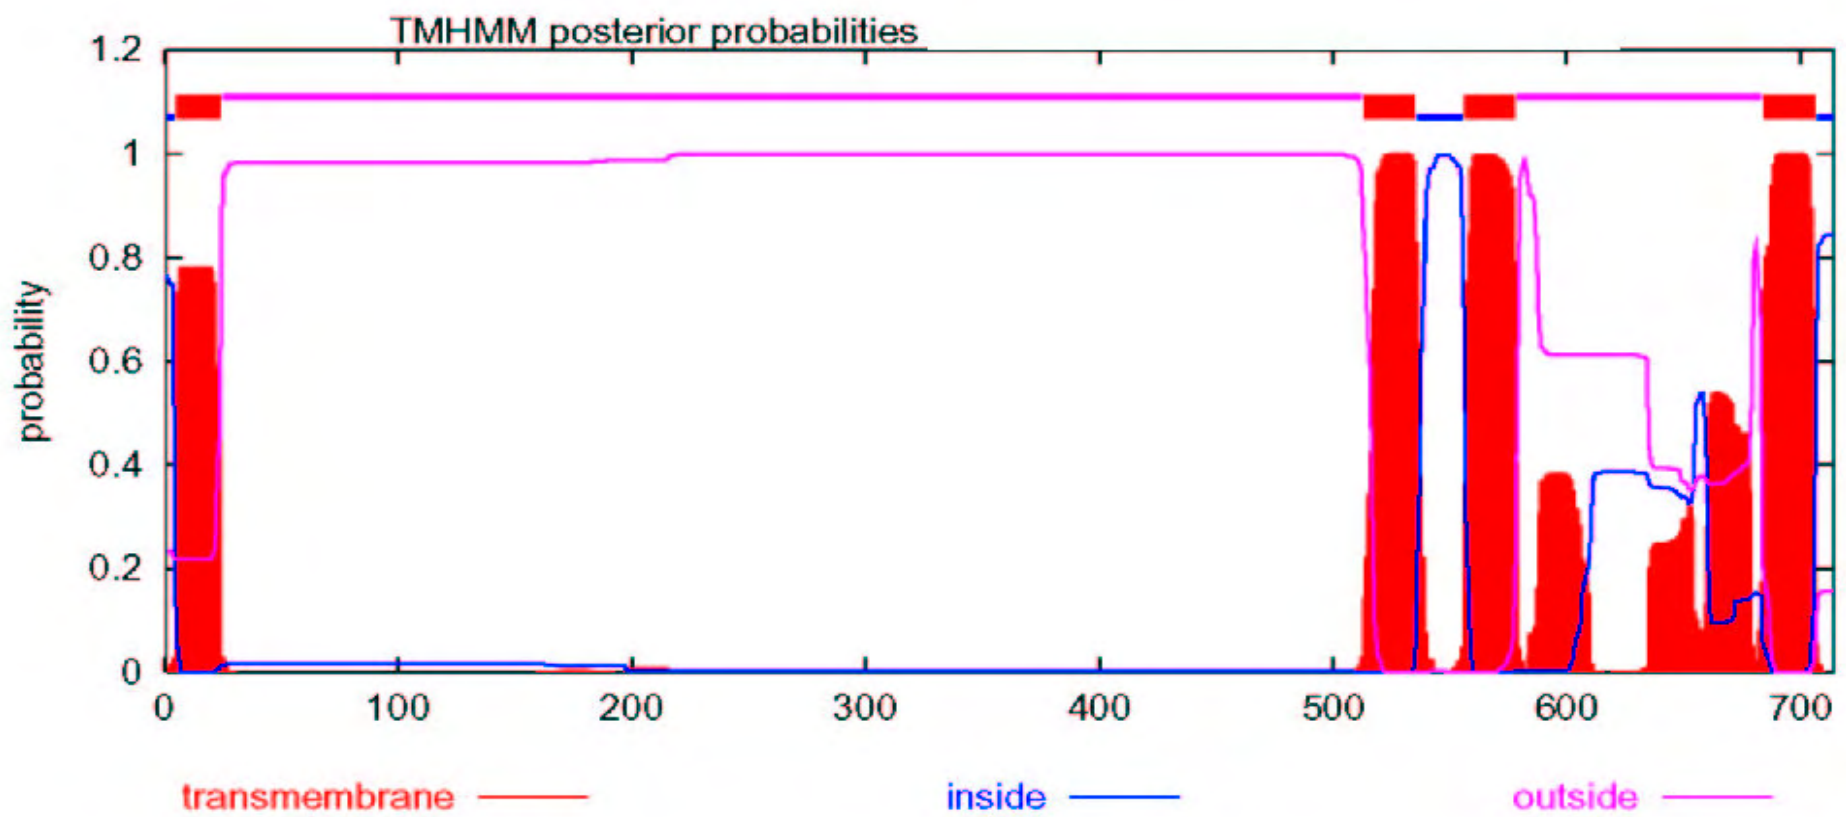

30

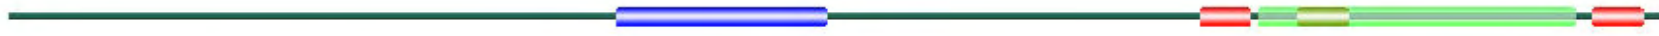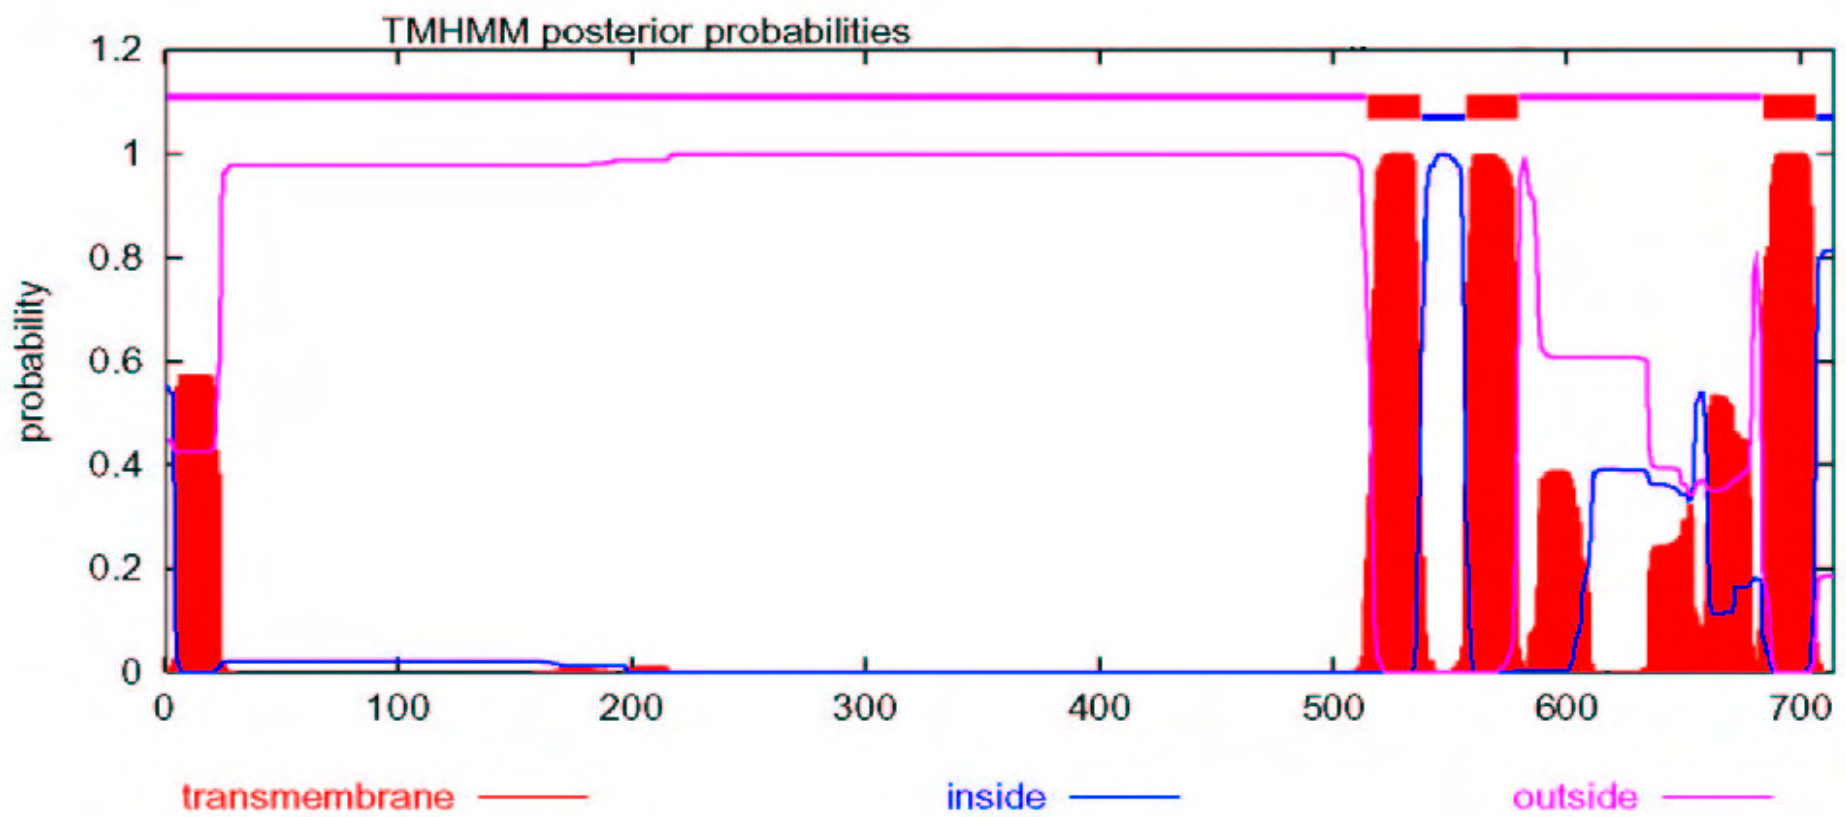

31

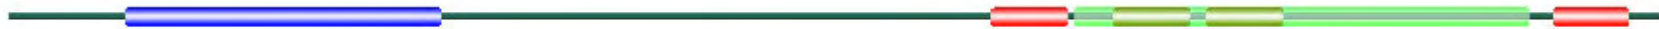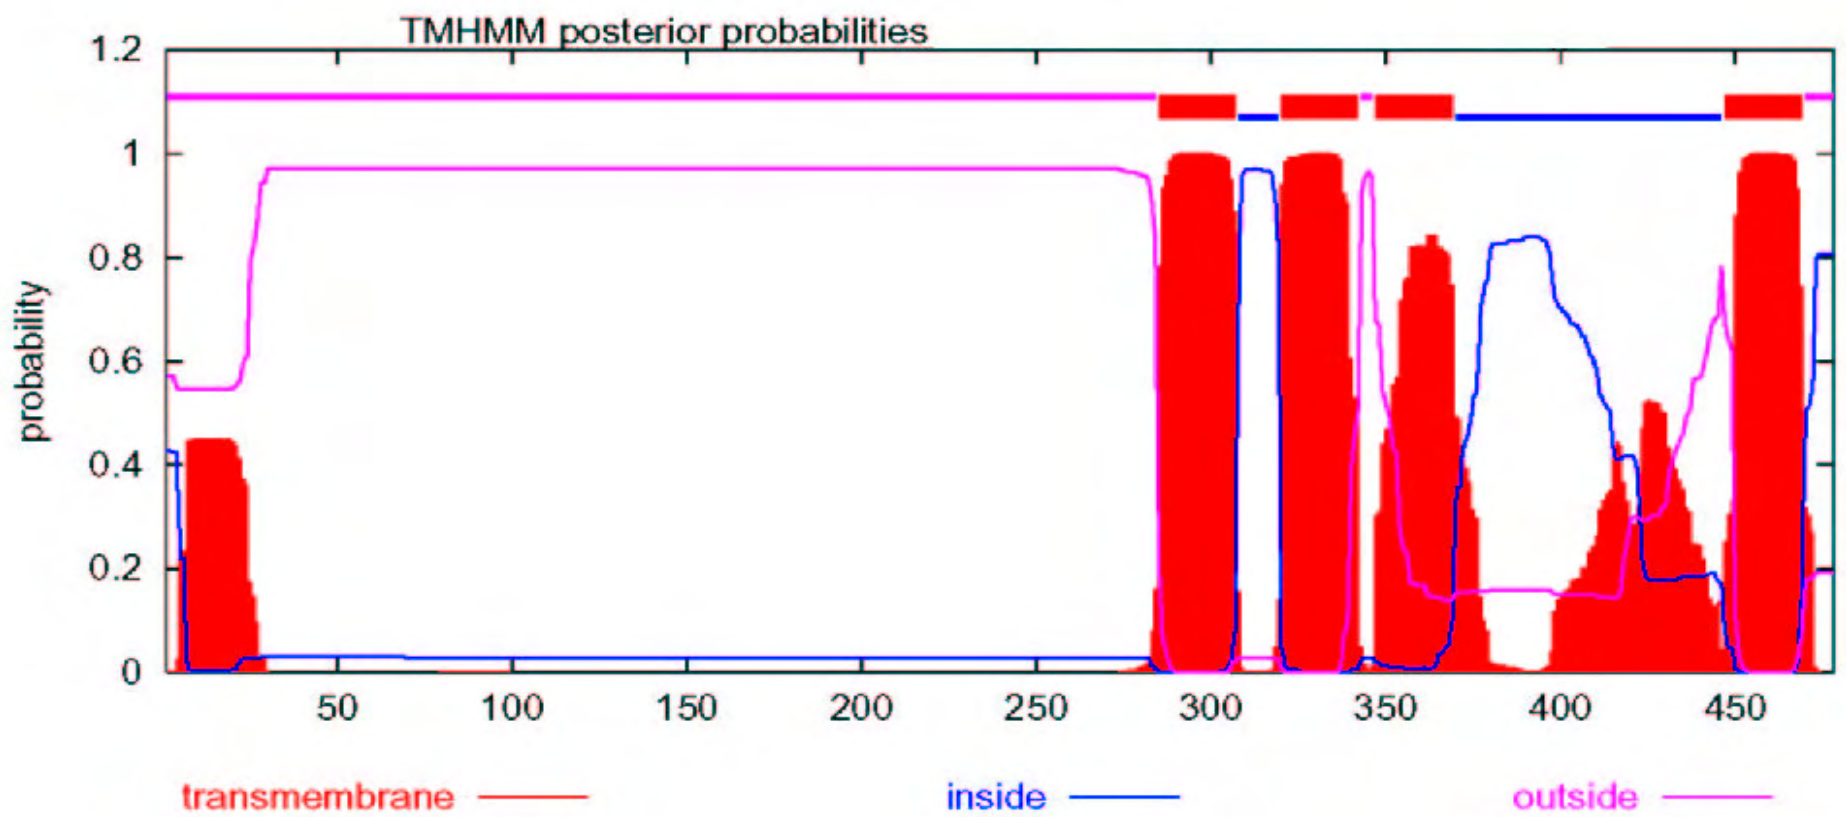



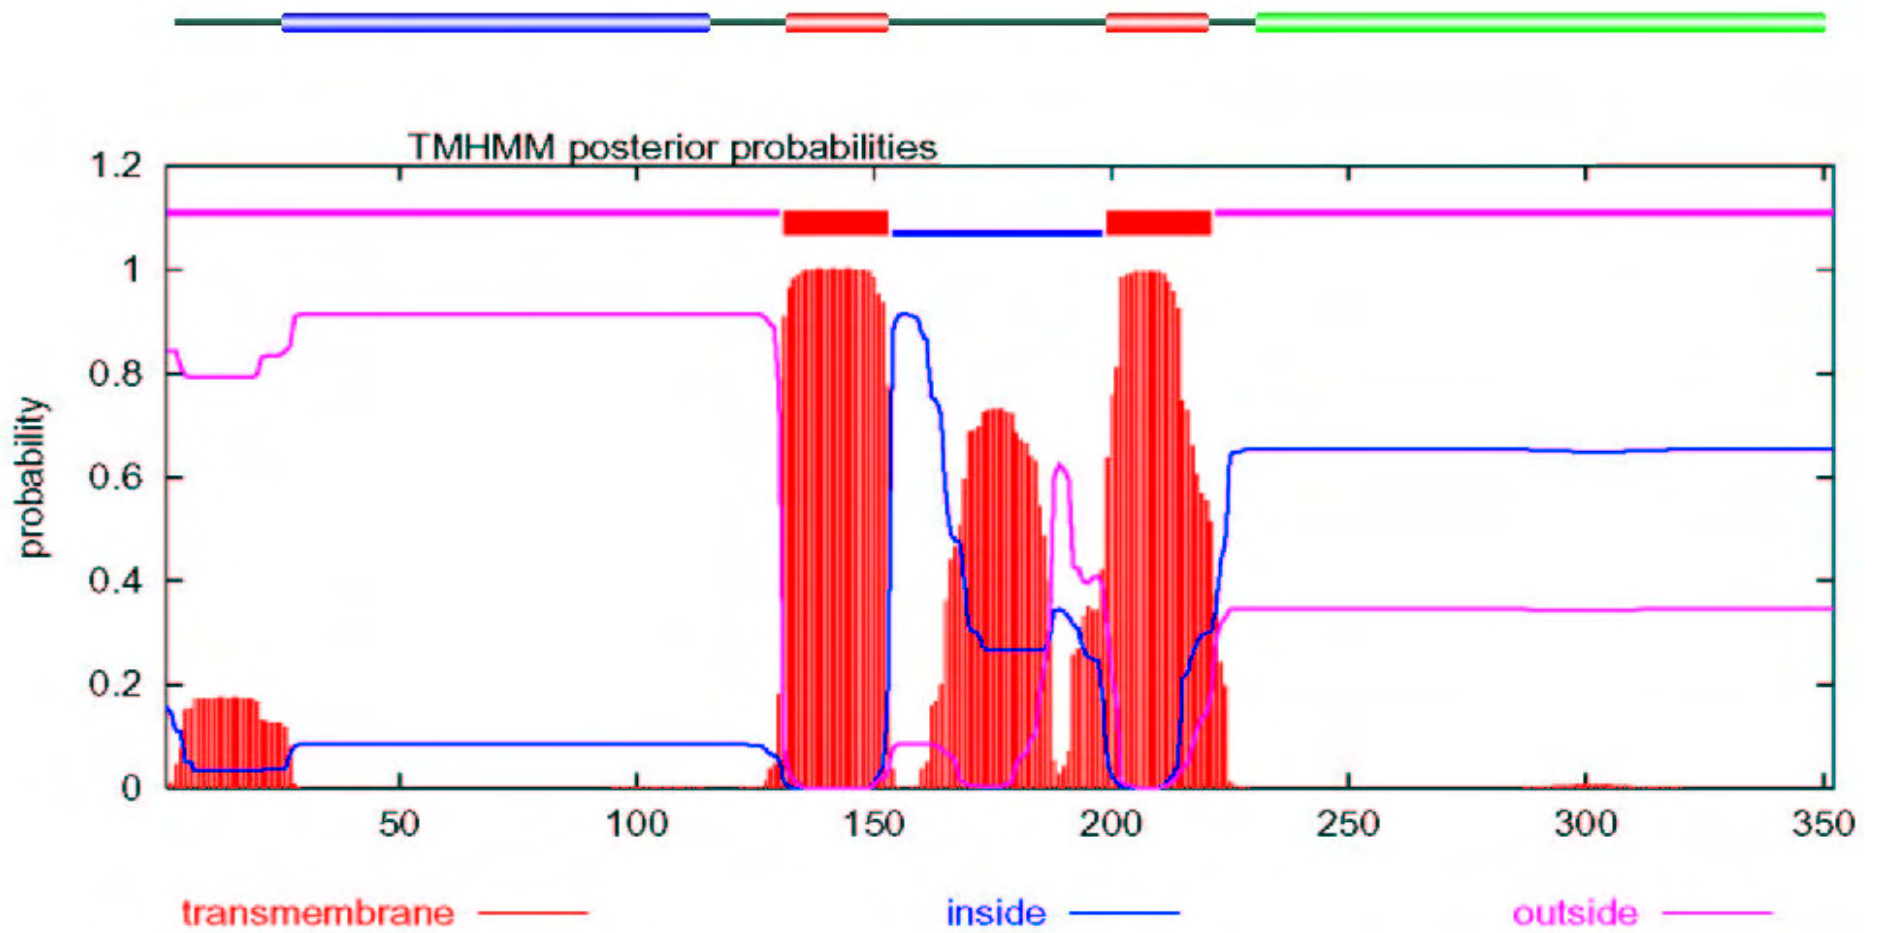

33

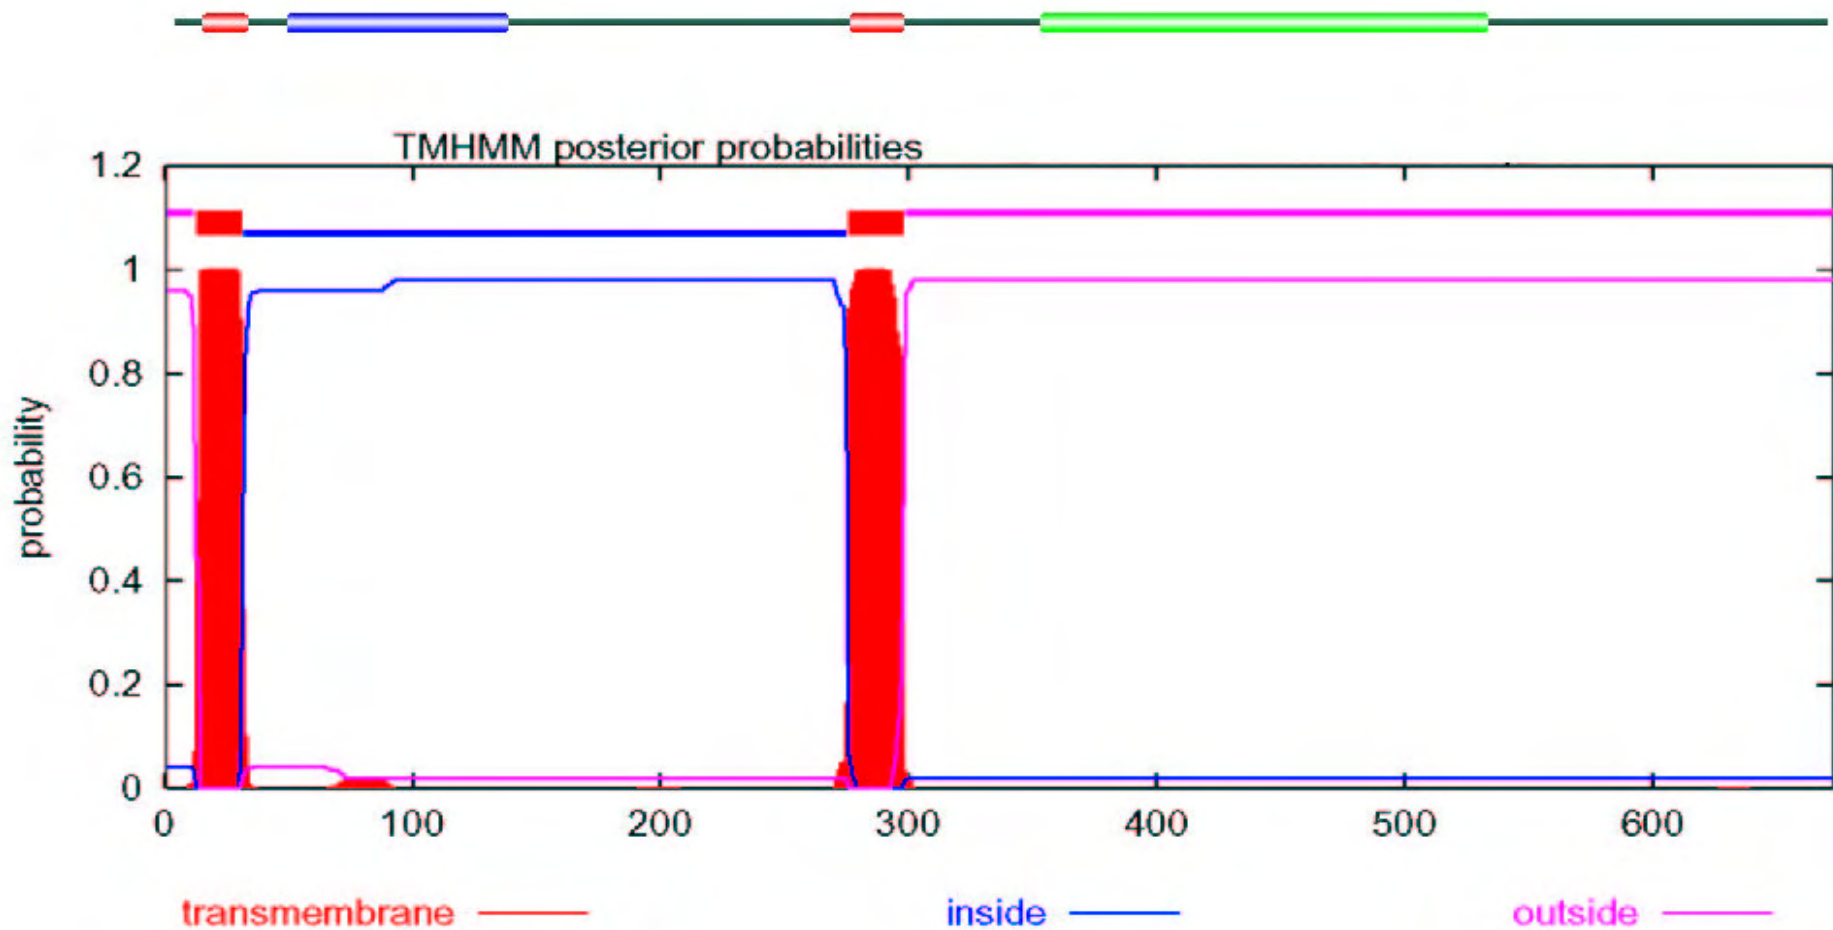

34

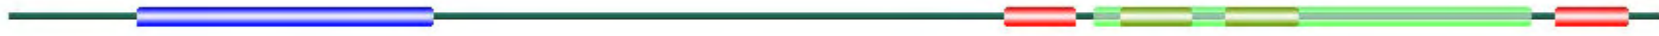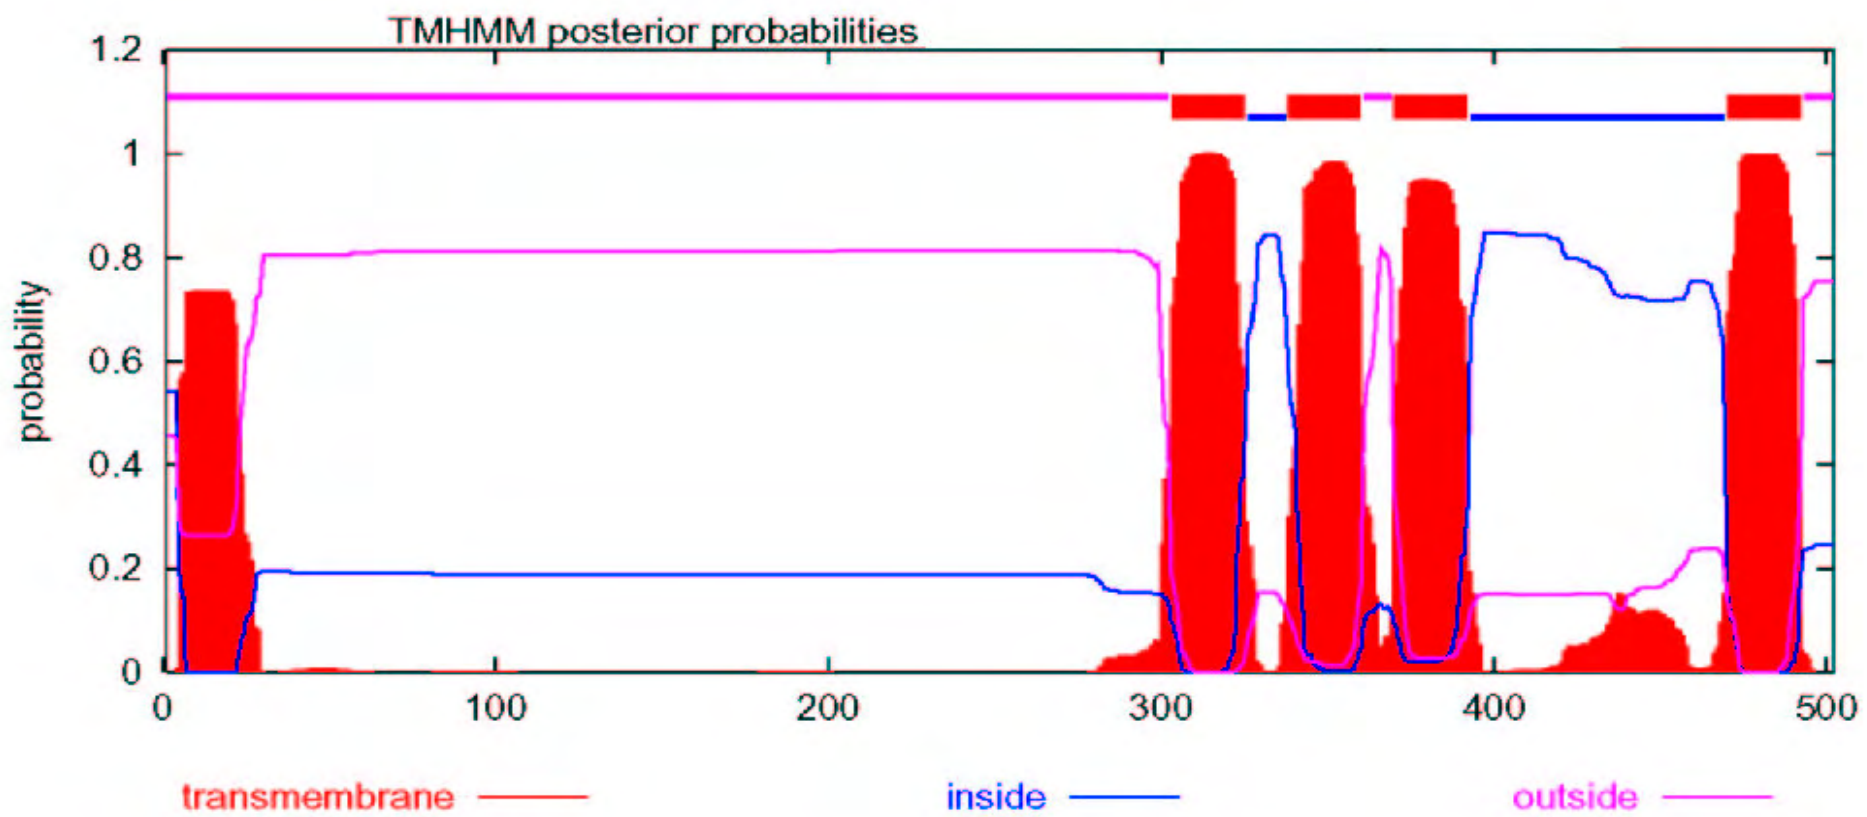

35

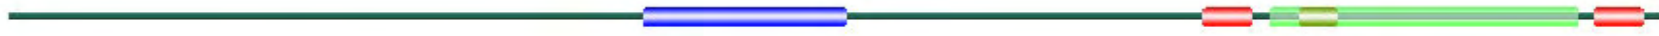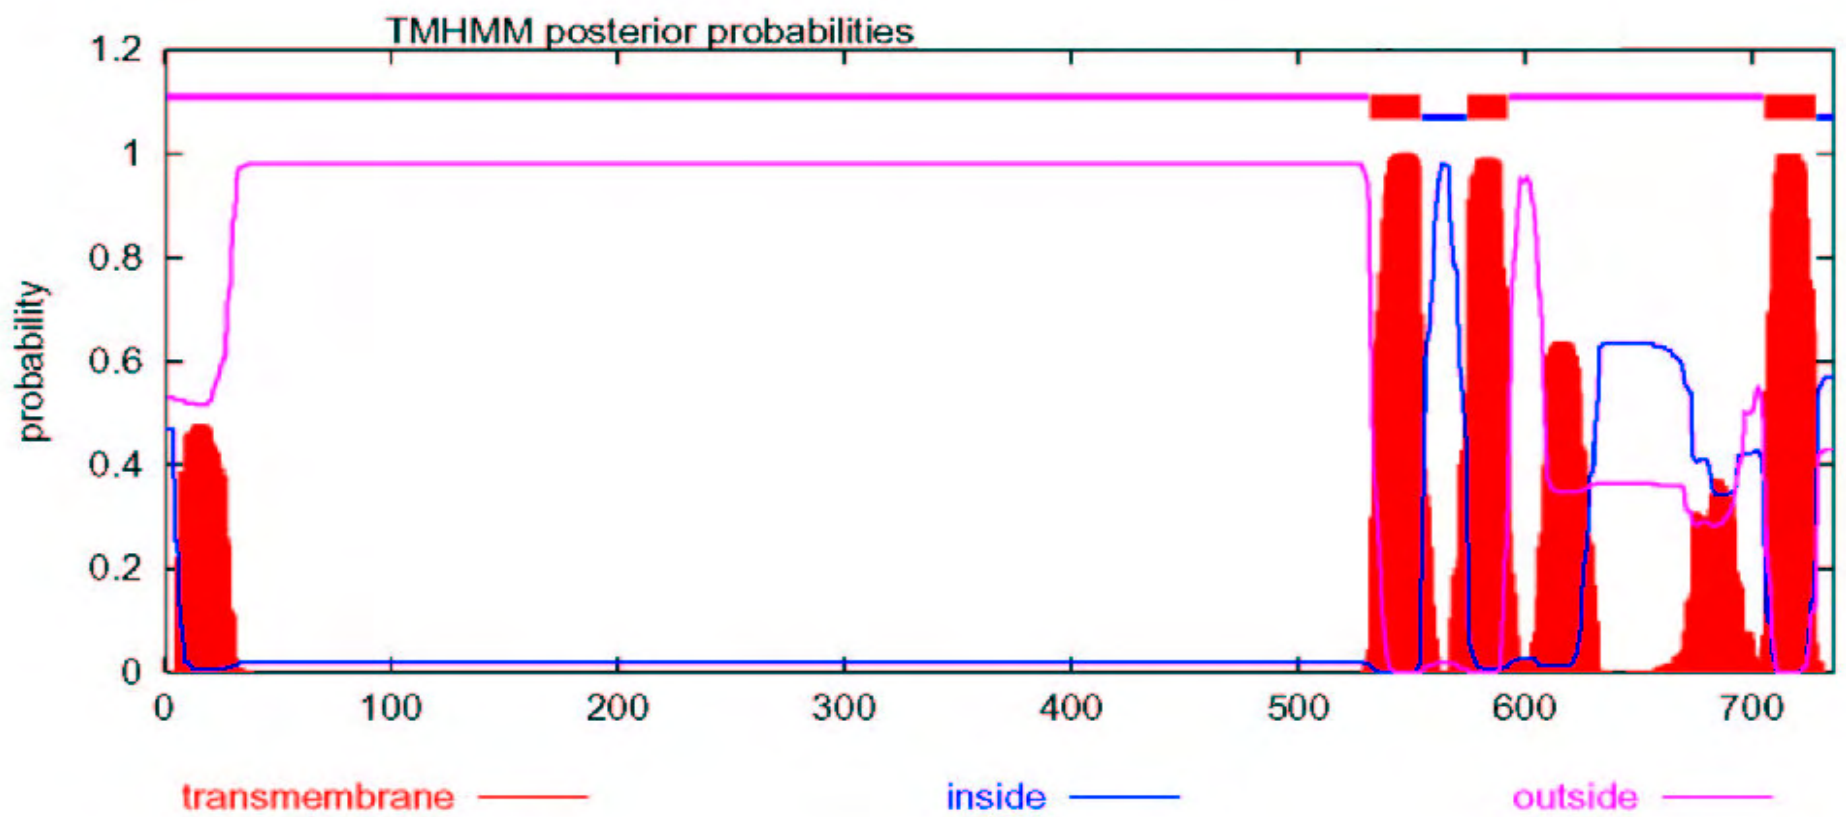

36

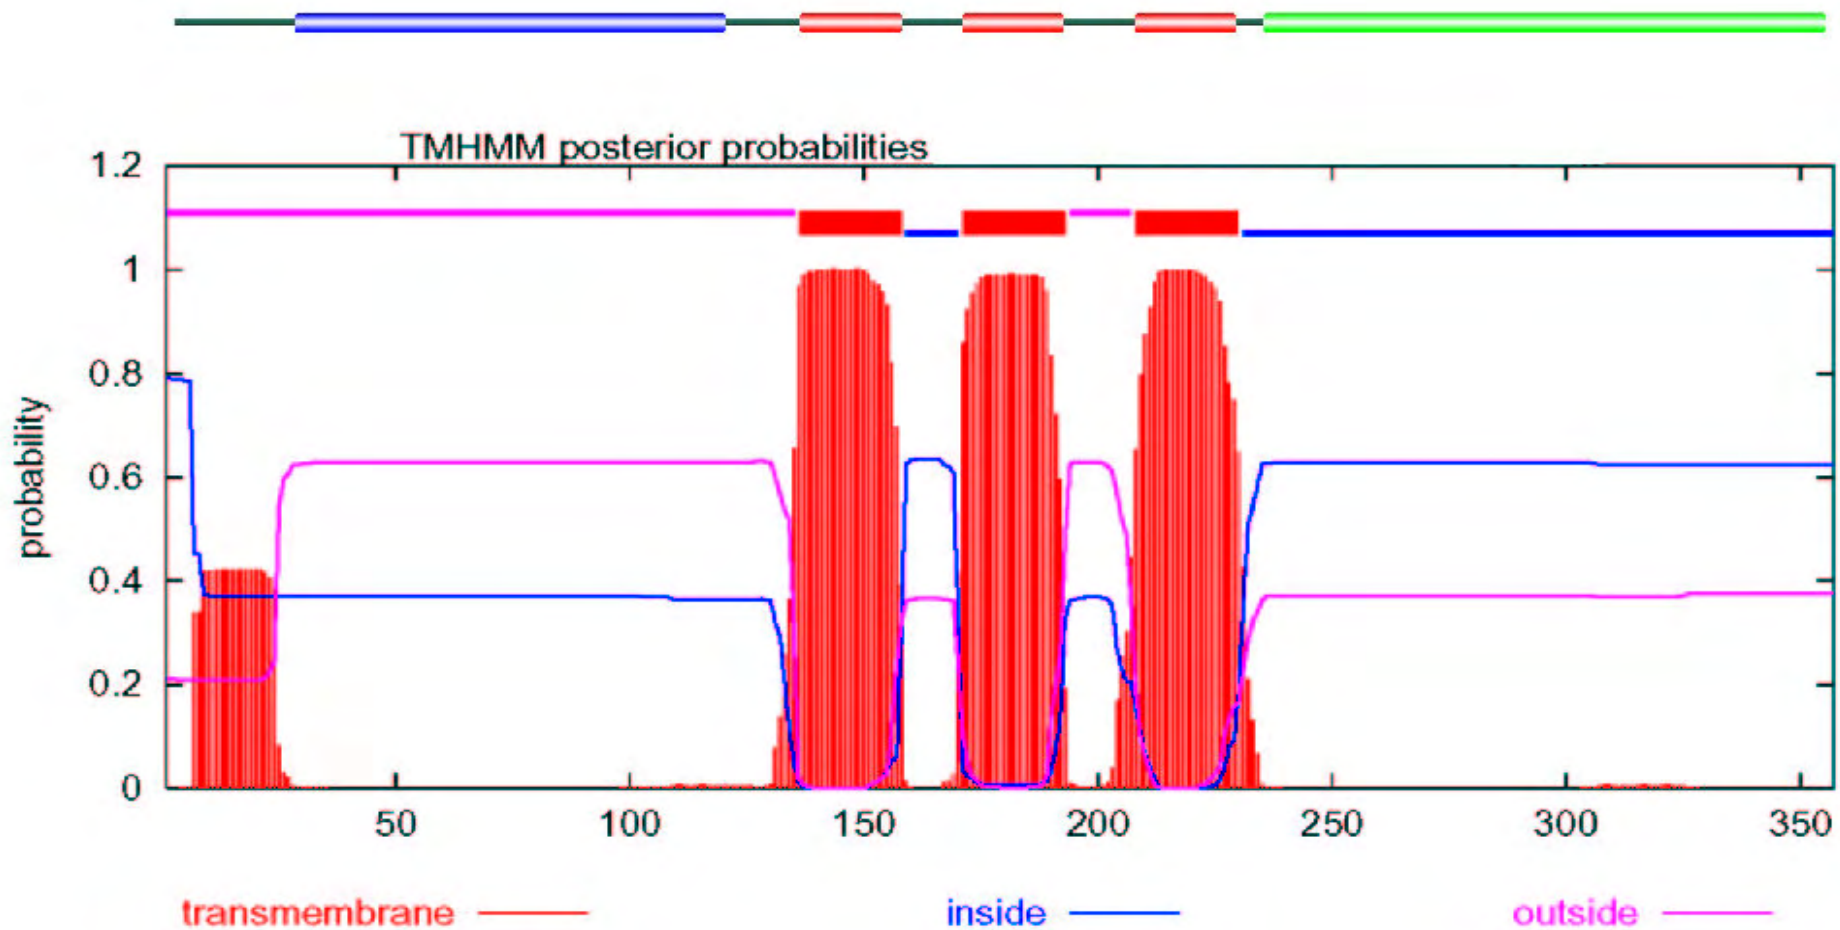

37

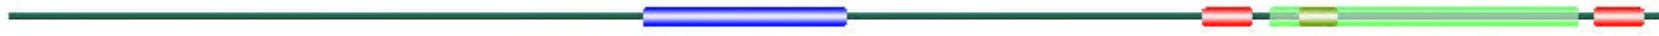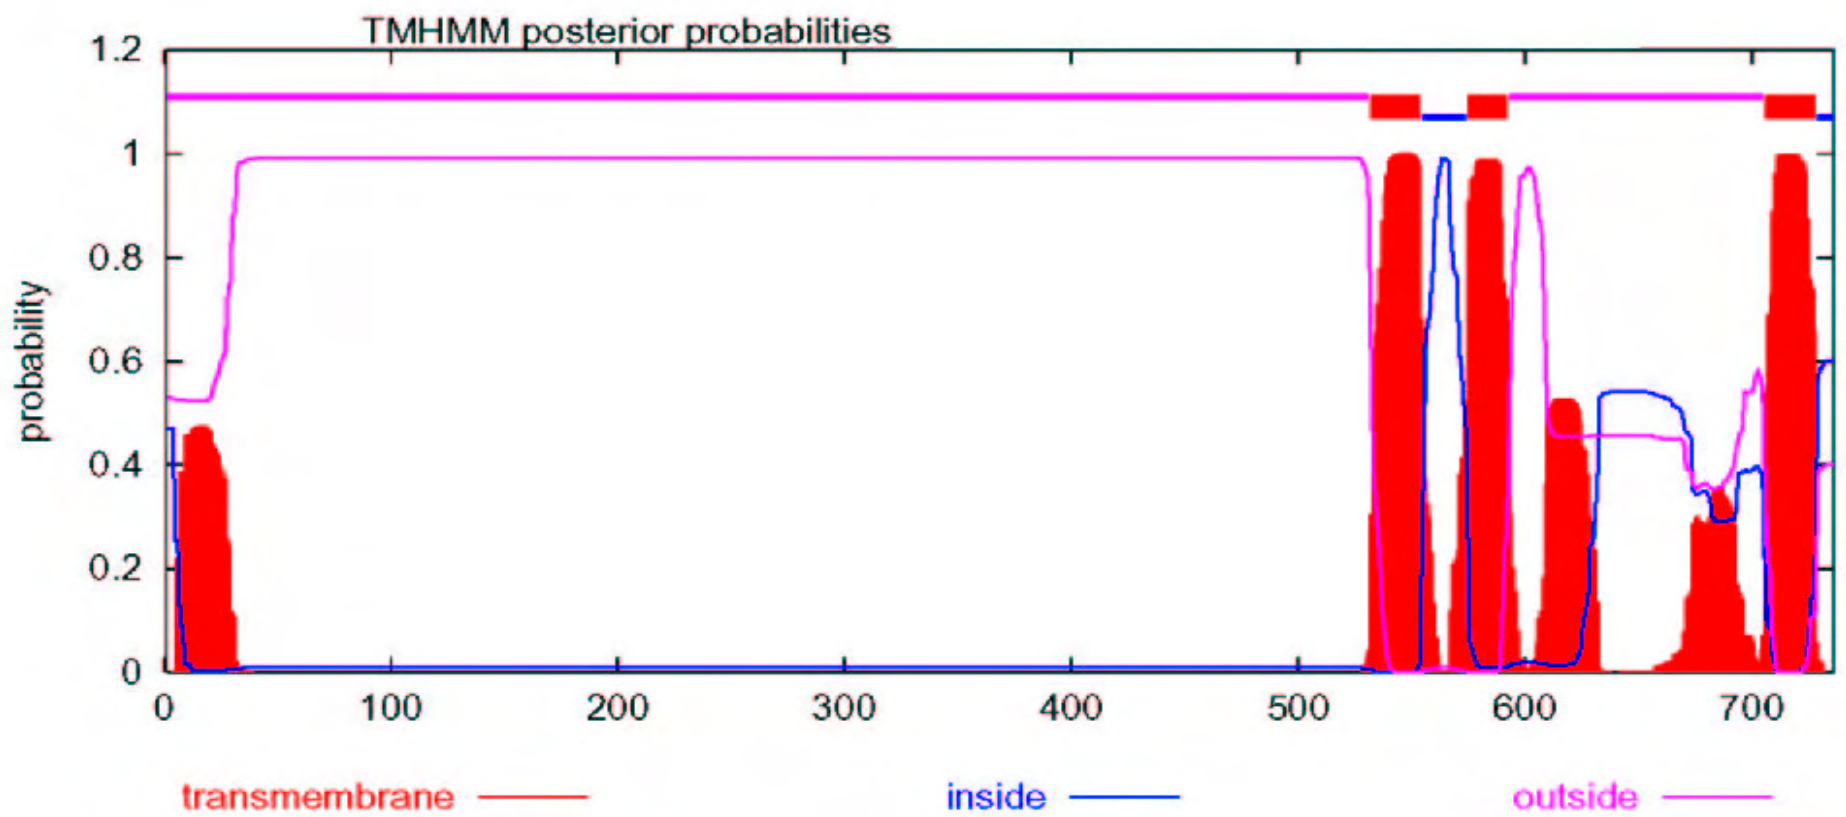

38



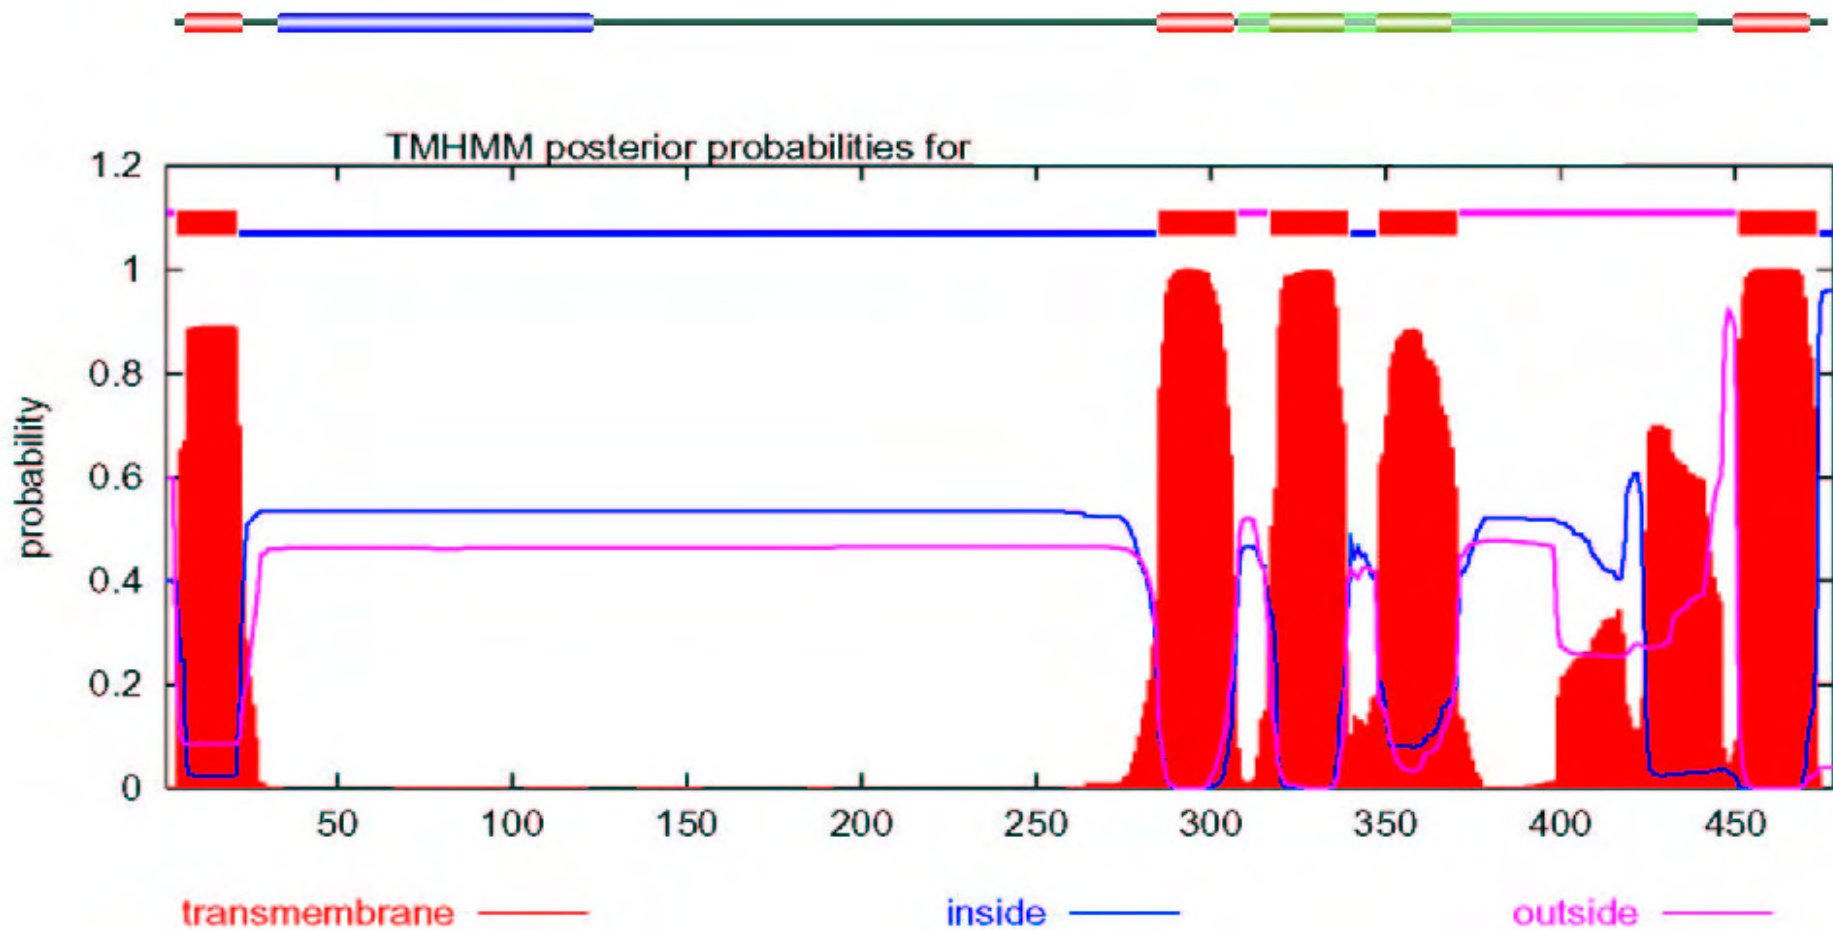

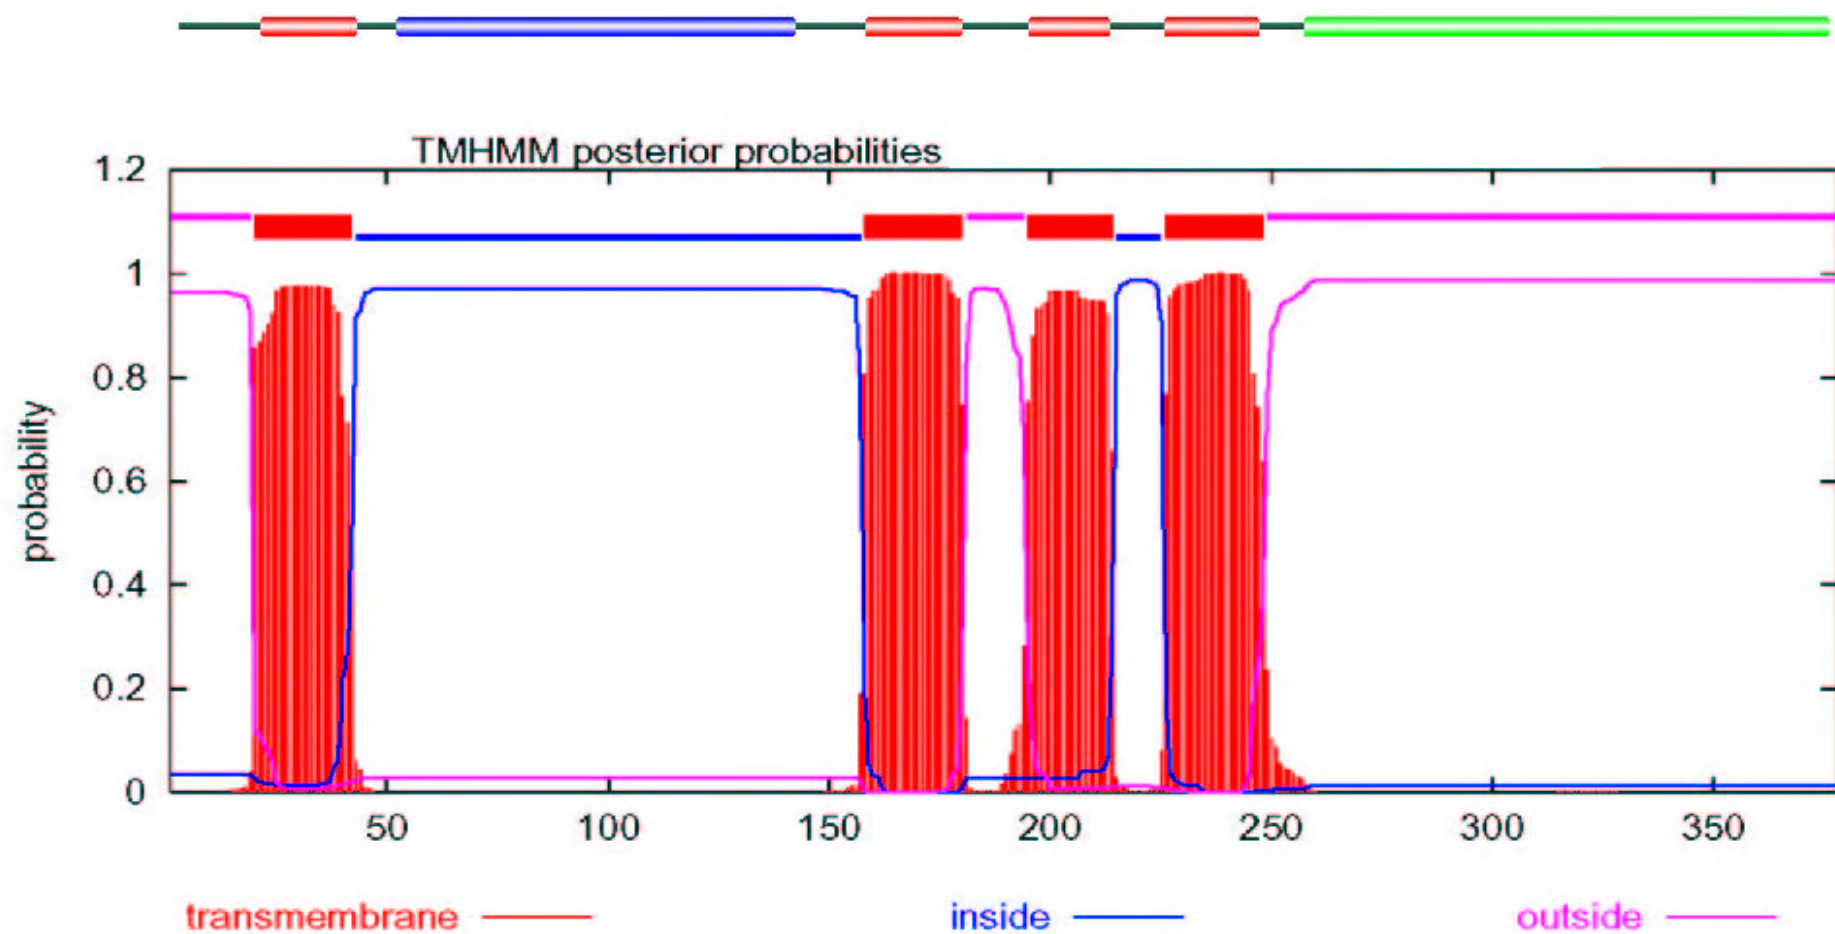

40

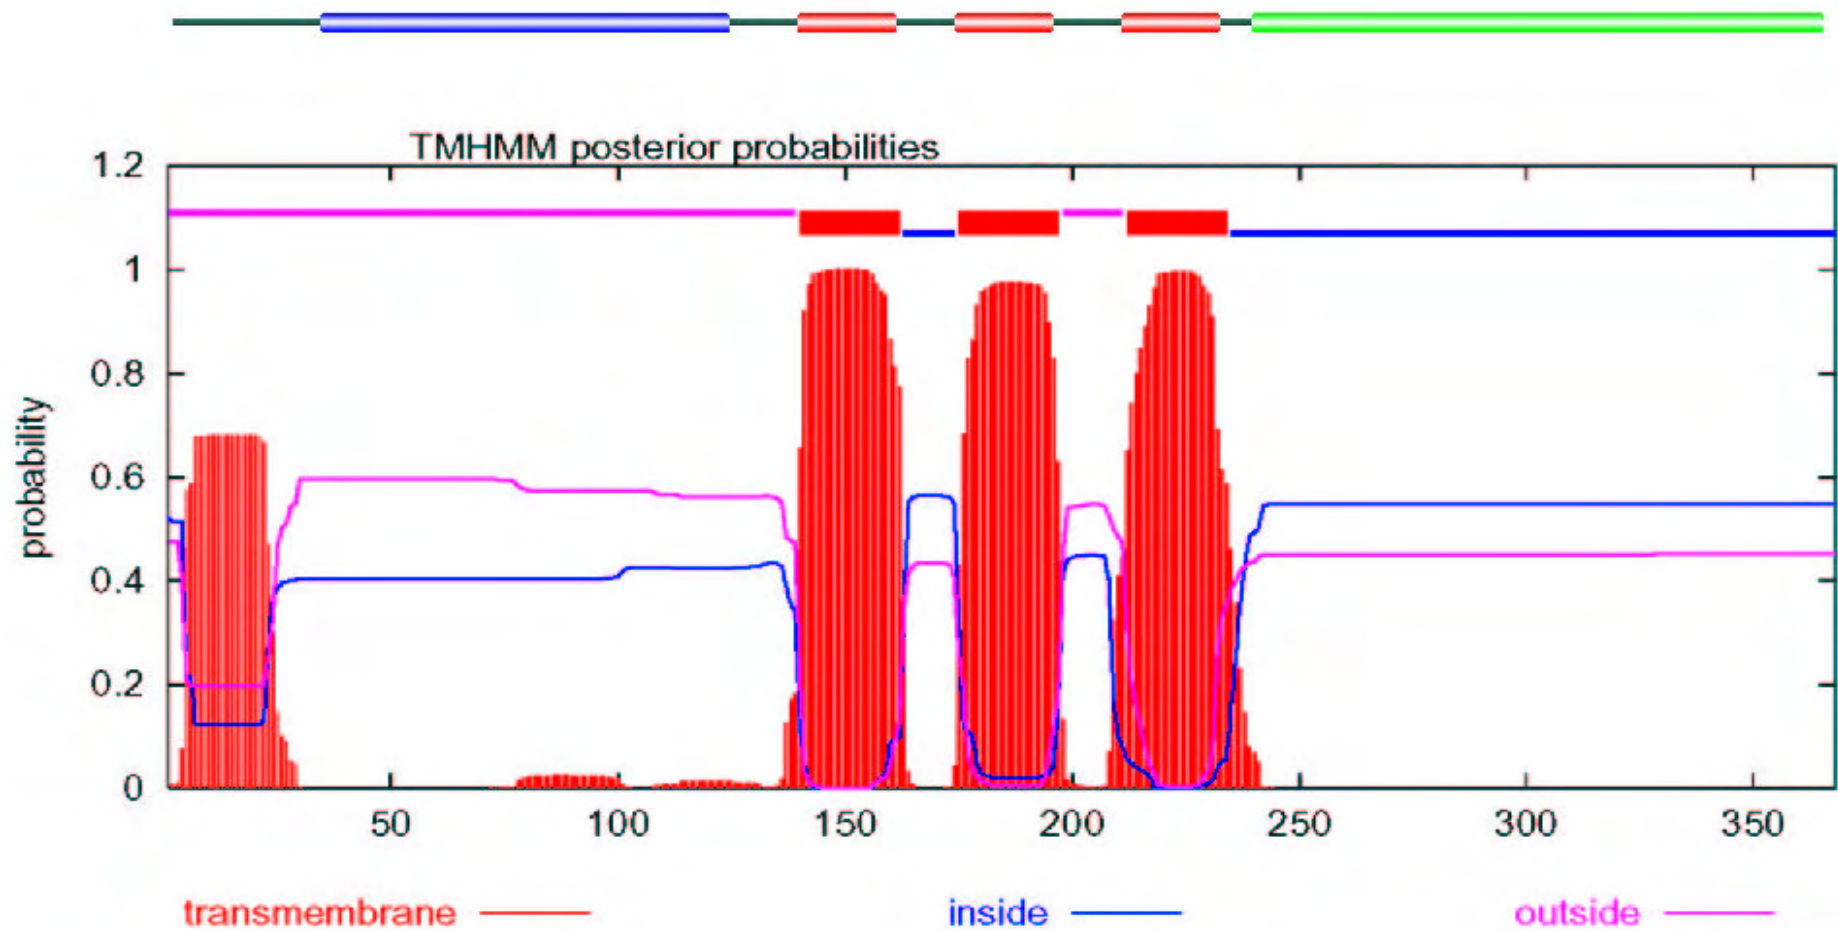

41

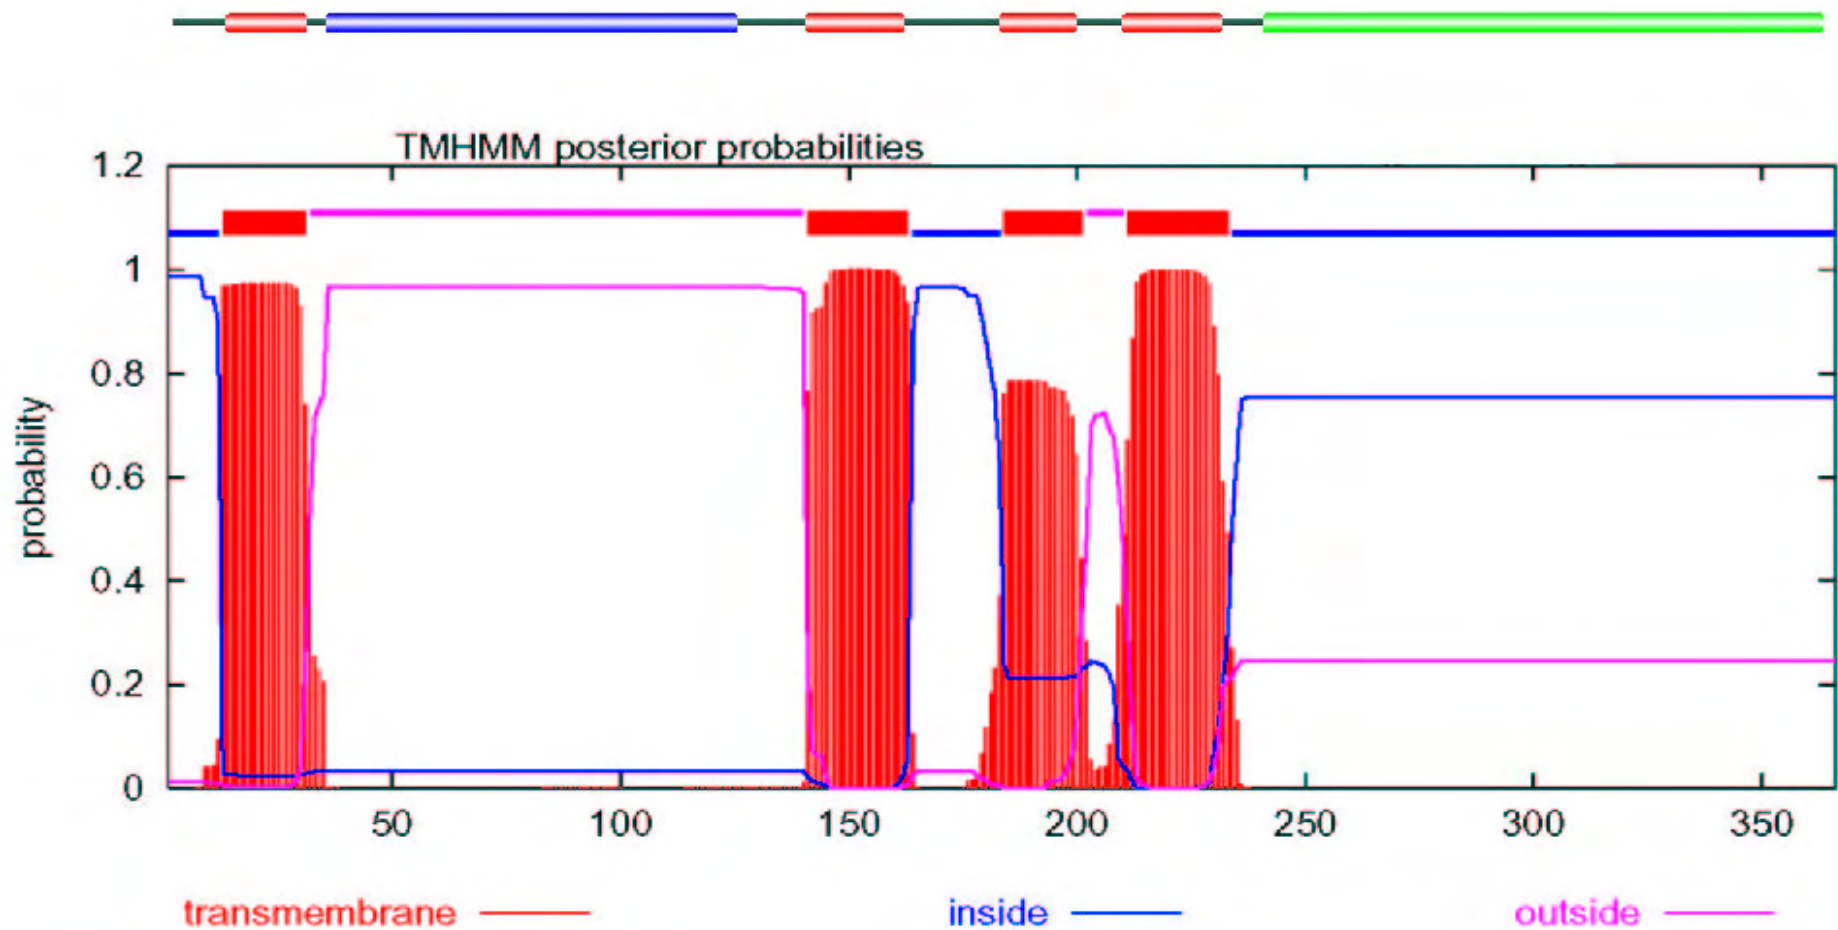

42

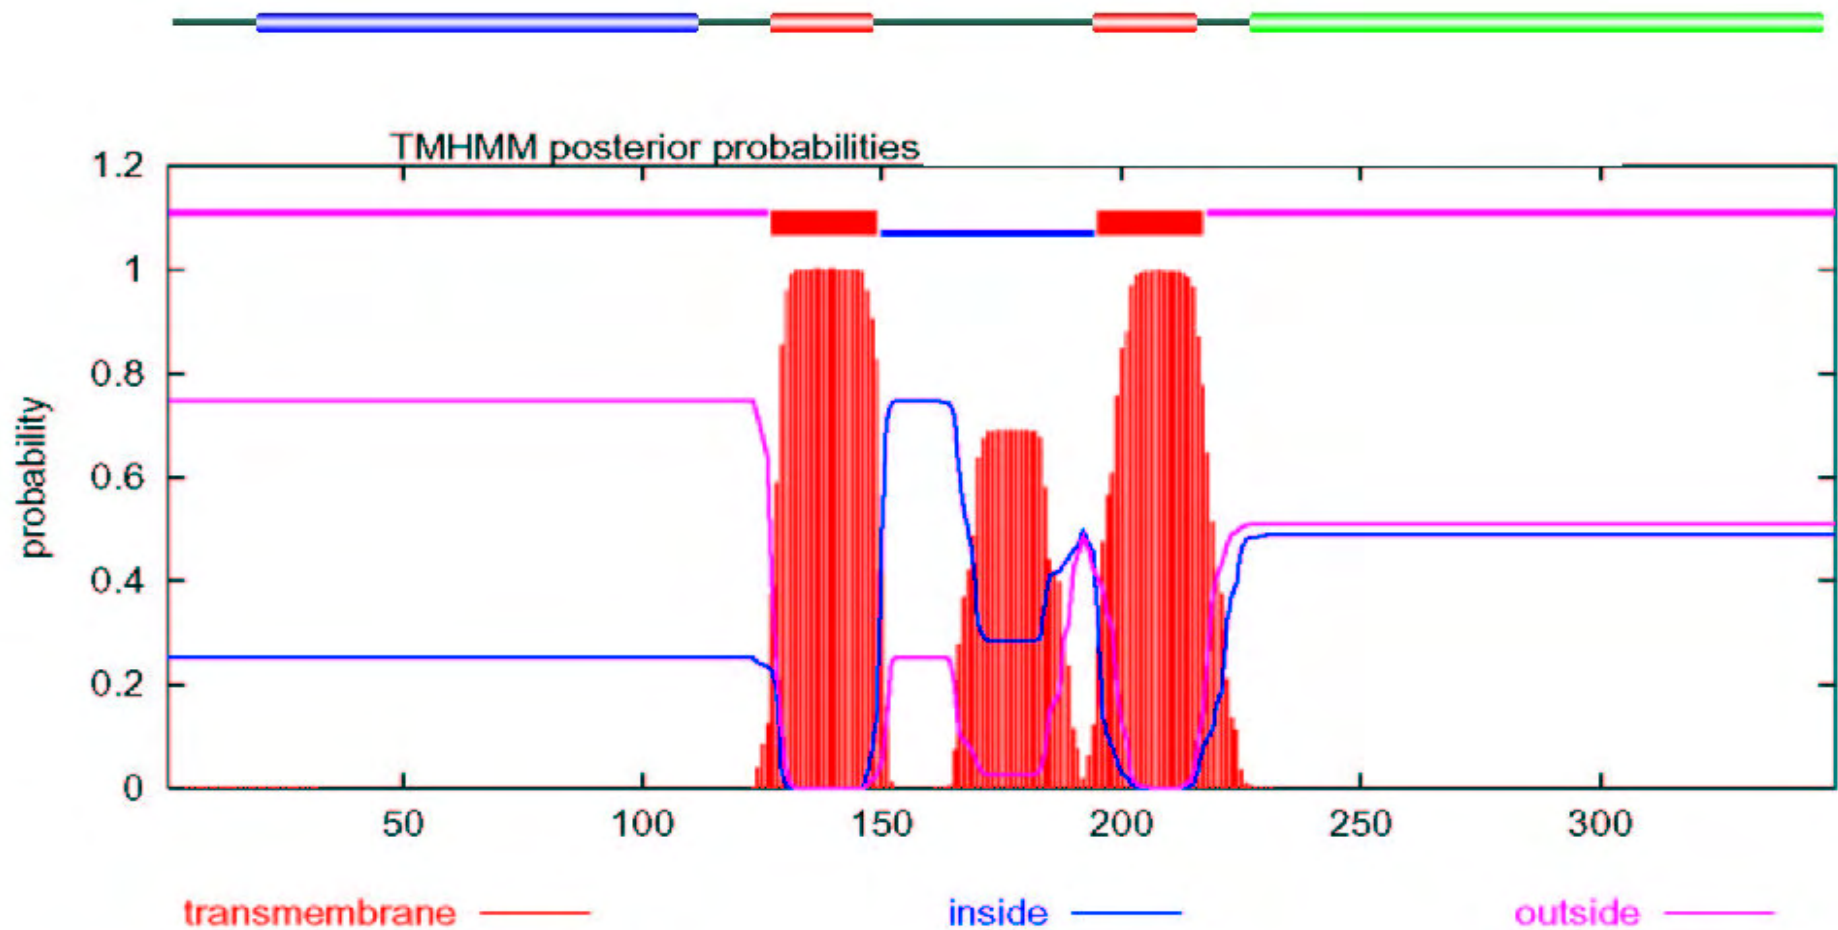

43

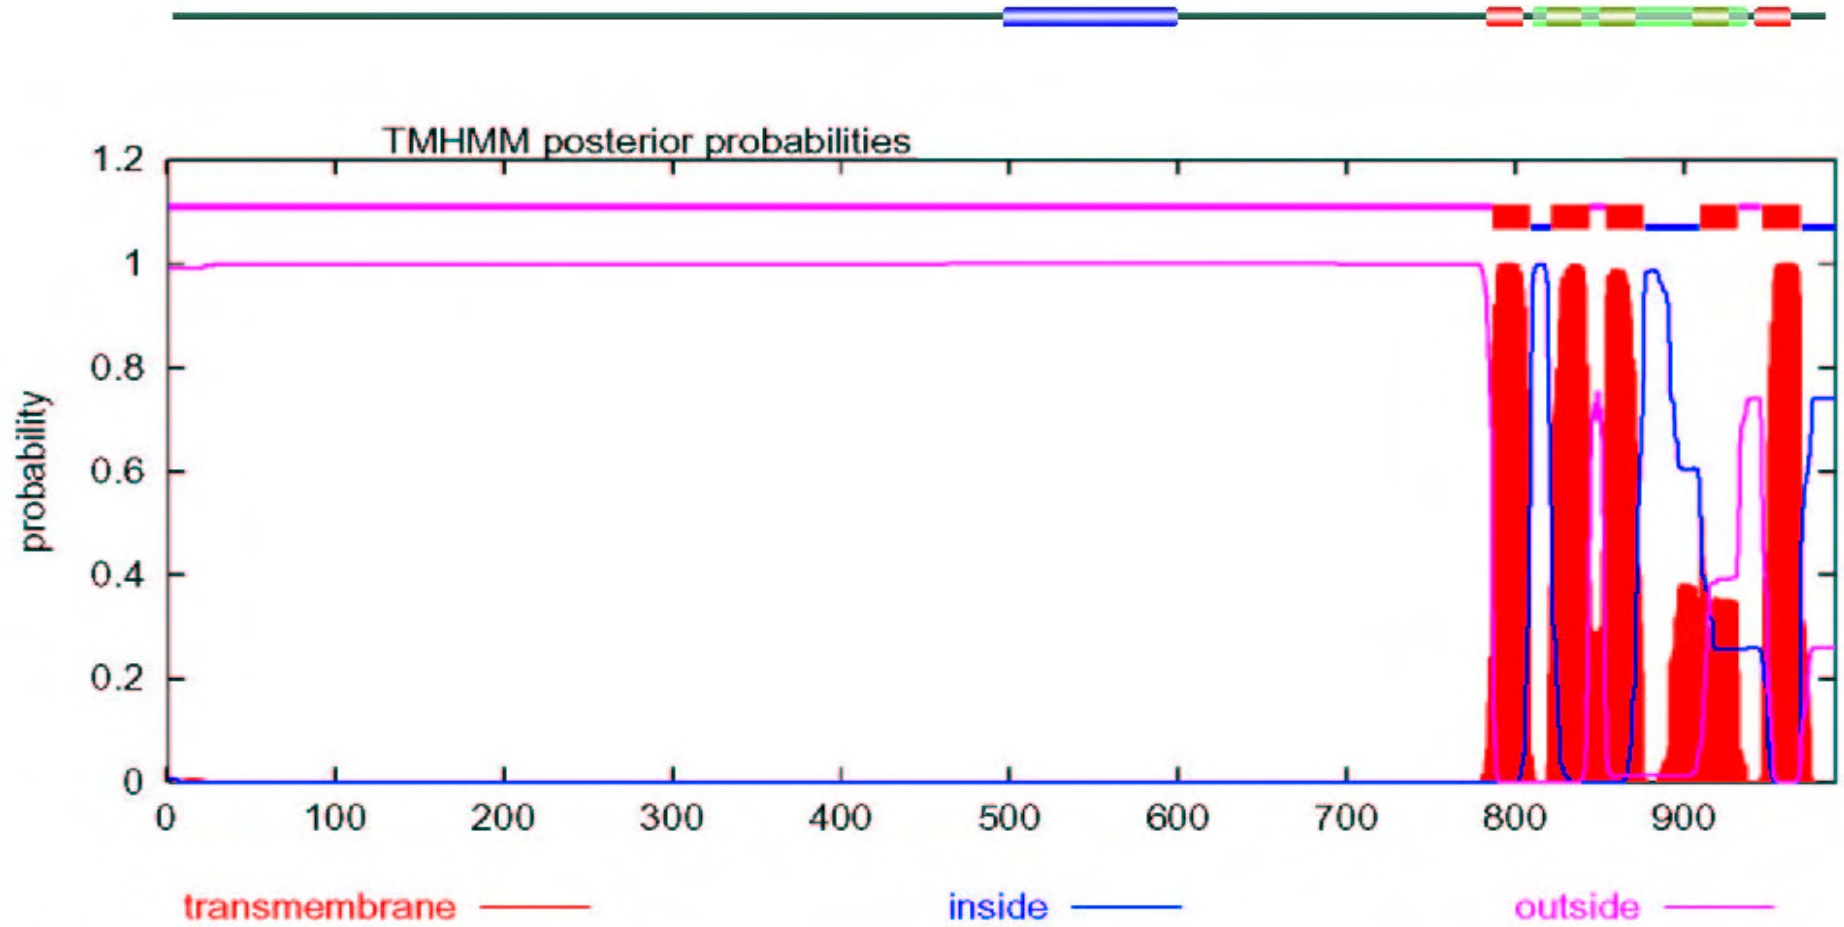

44

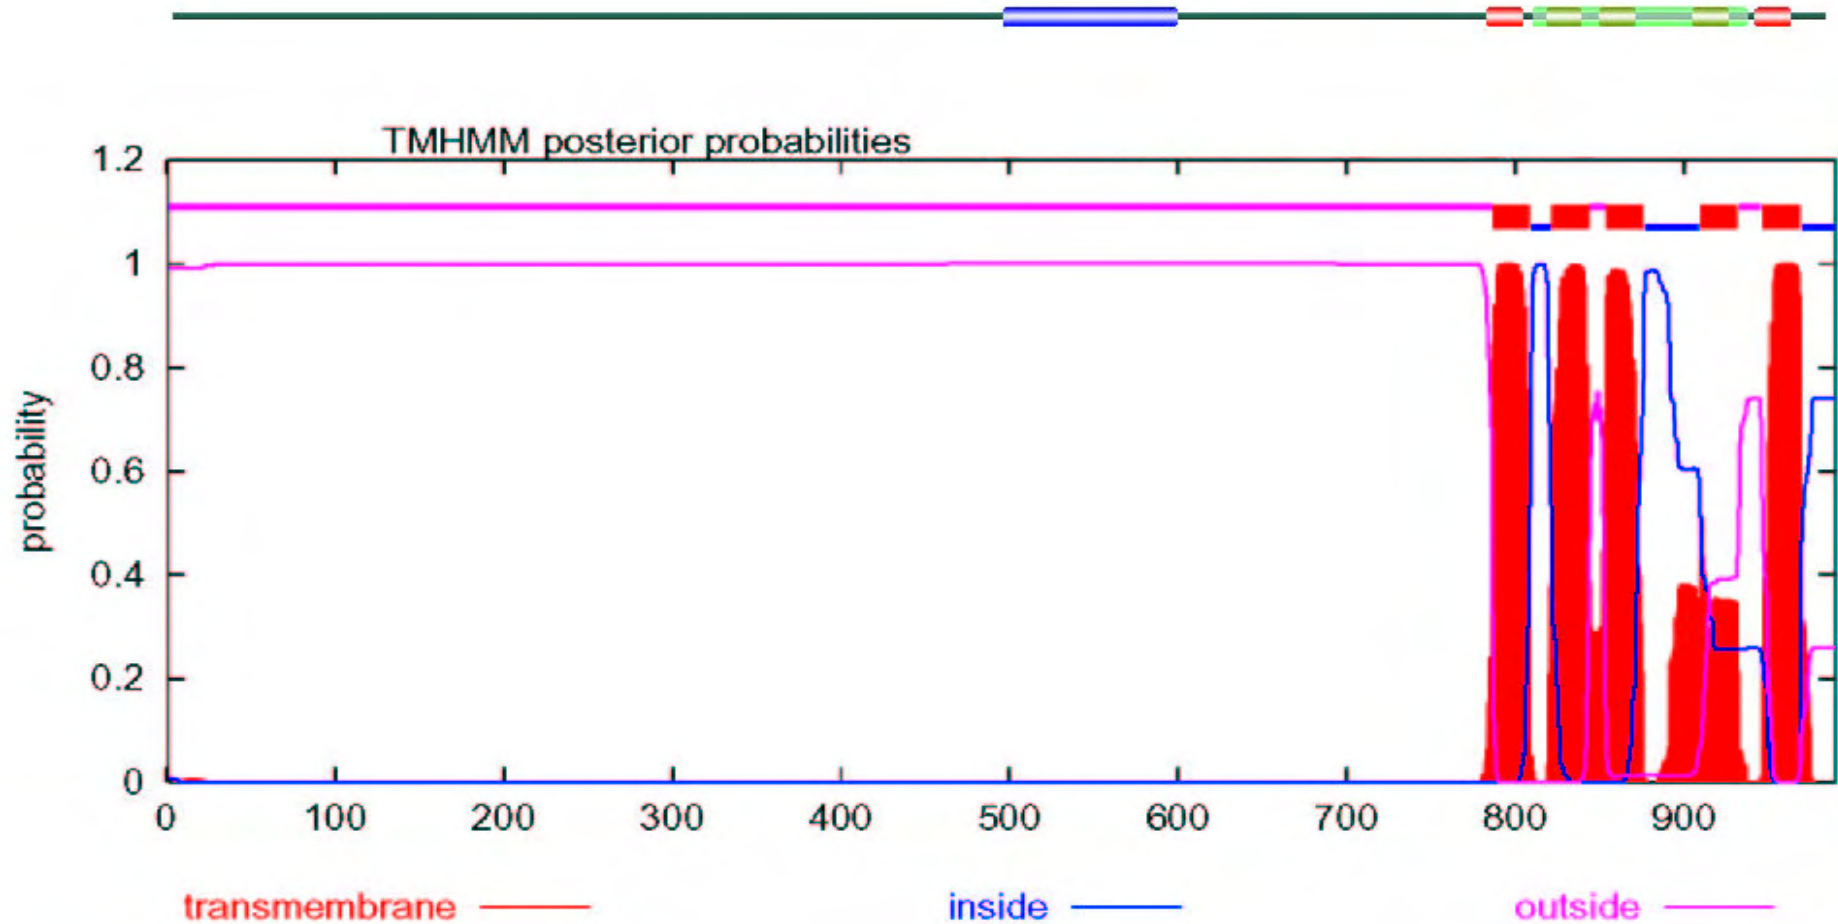

45



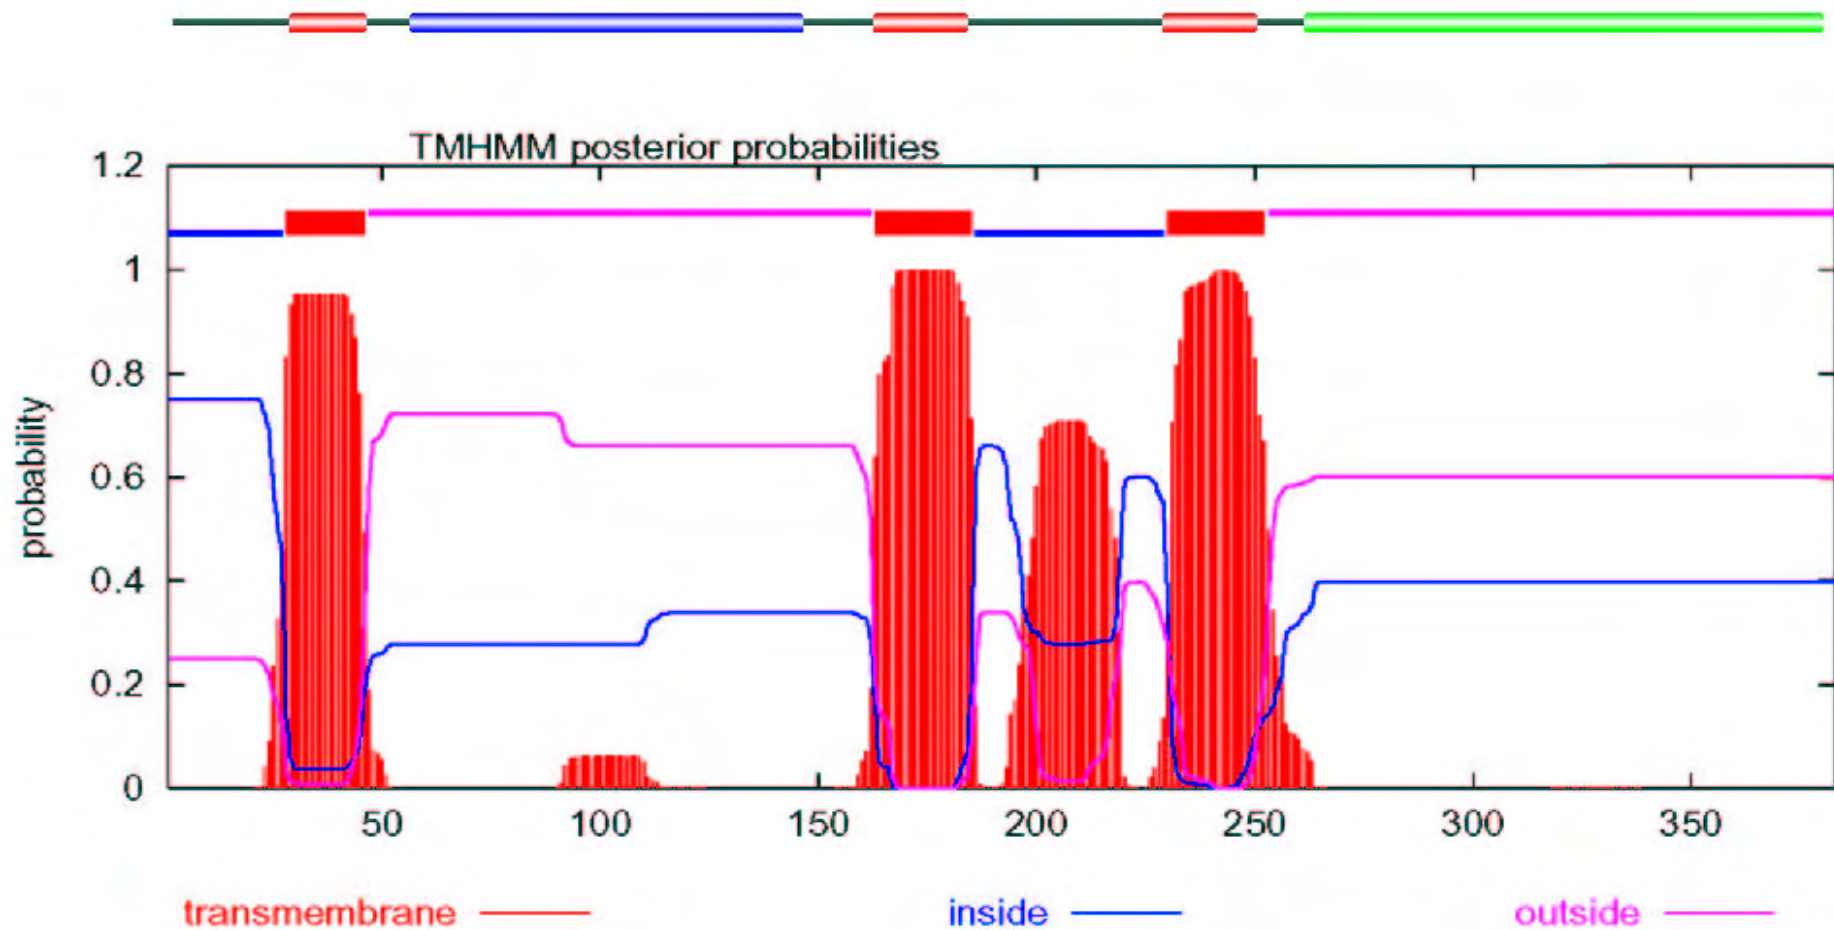

46

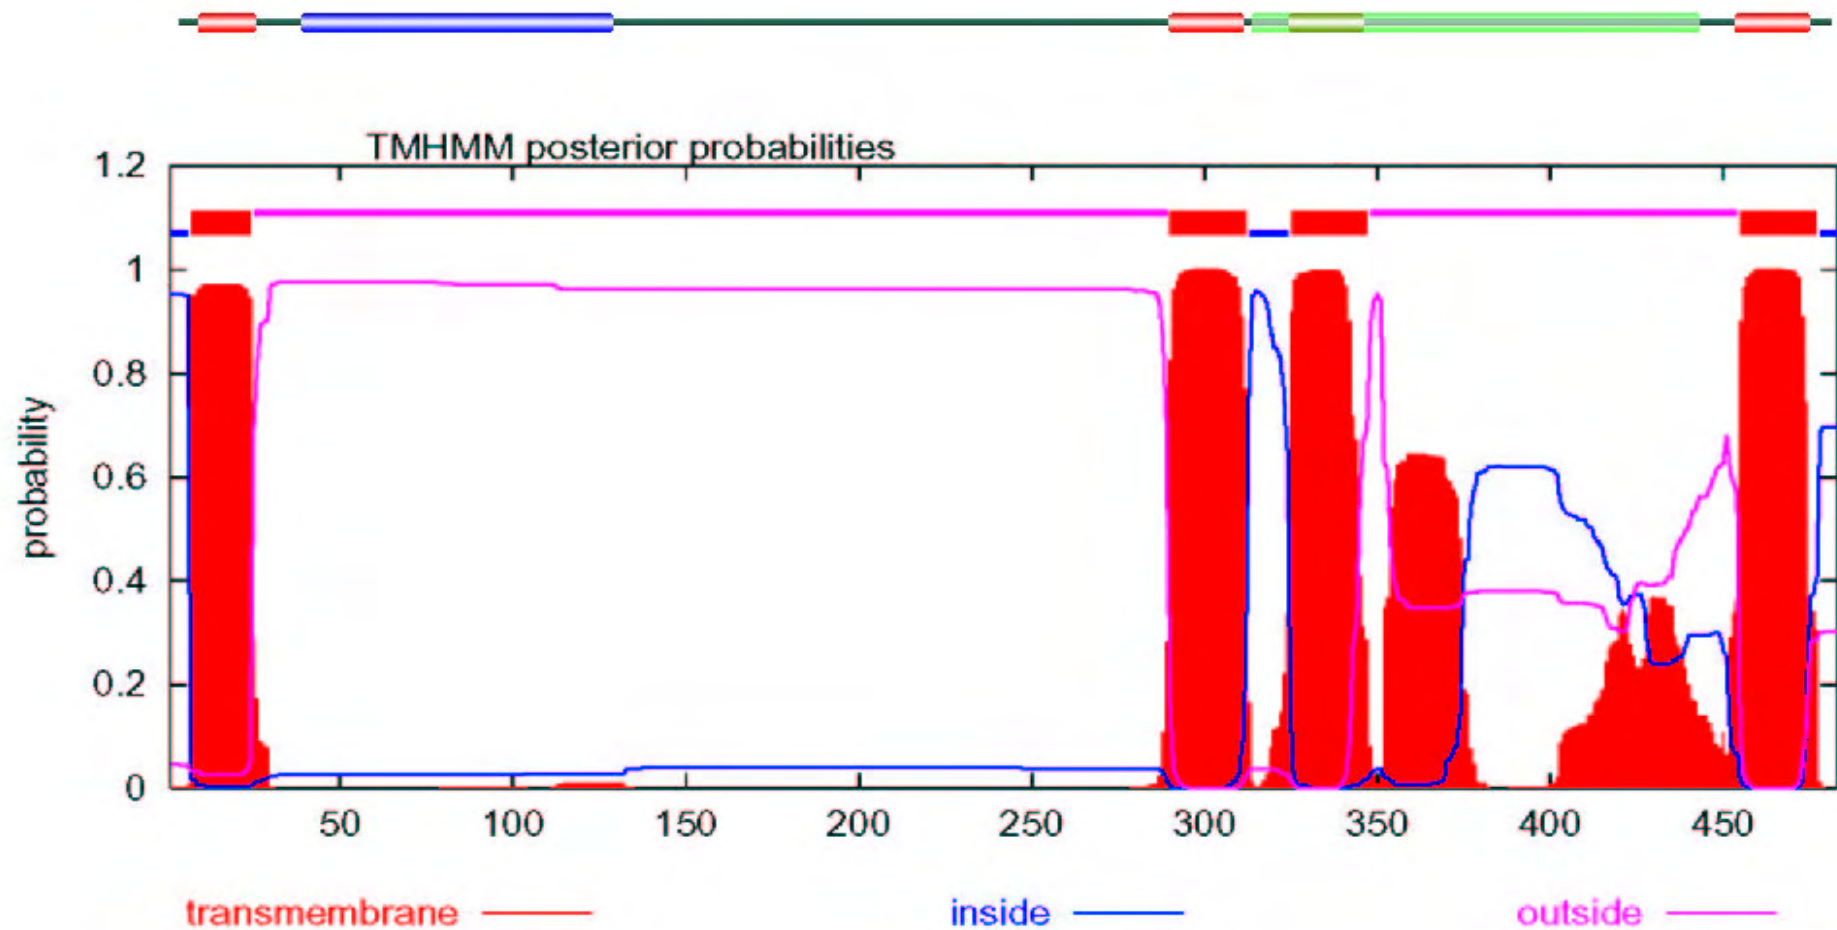

47

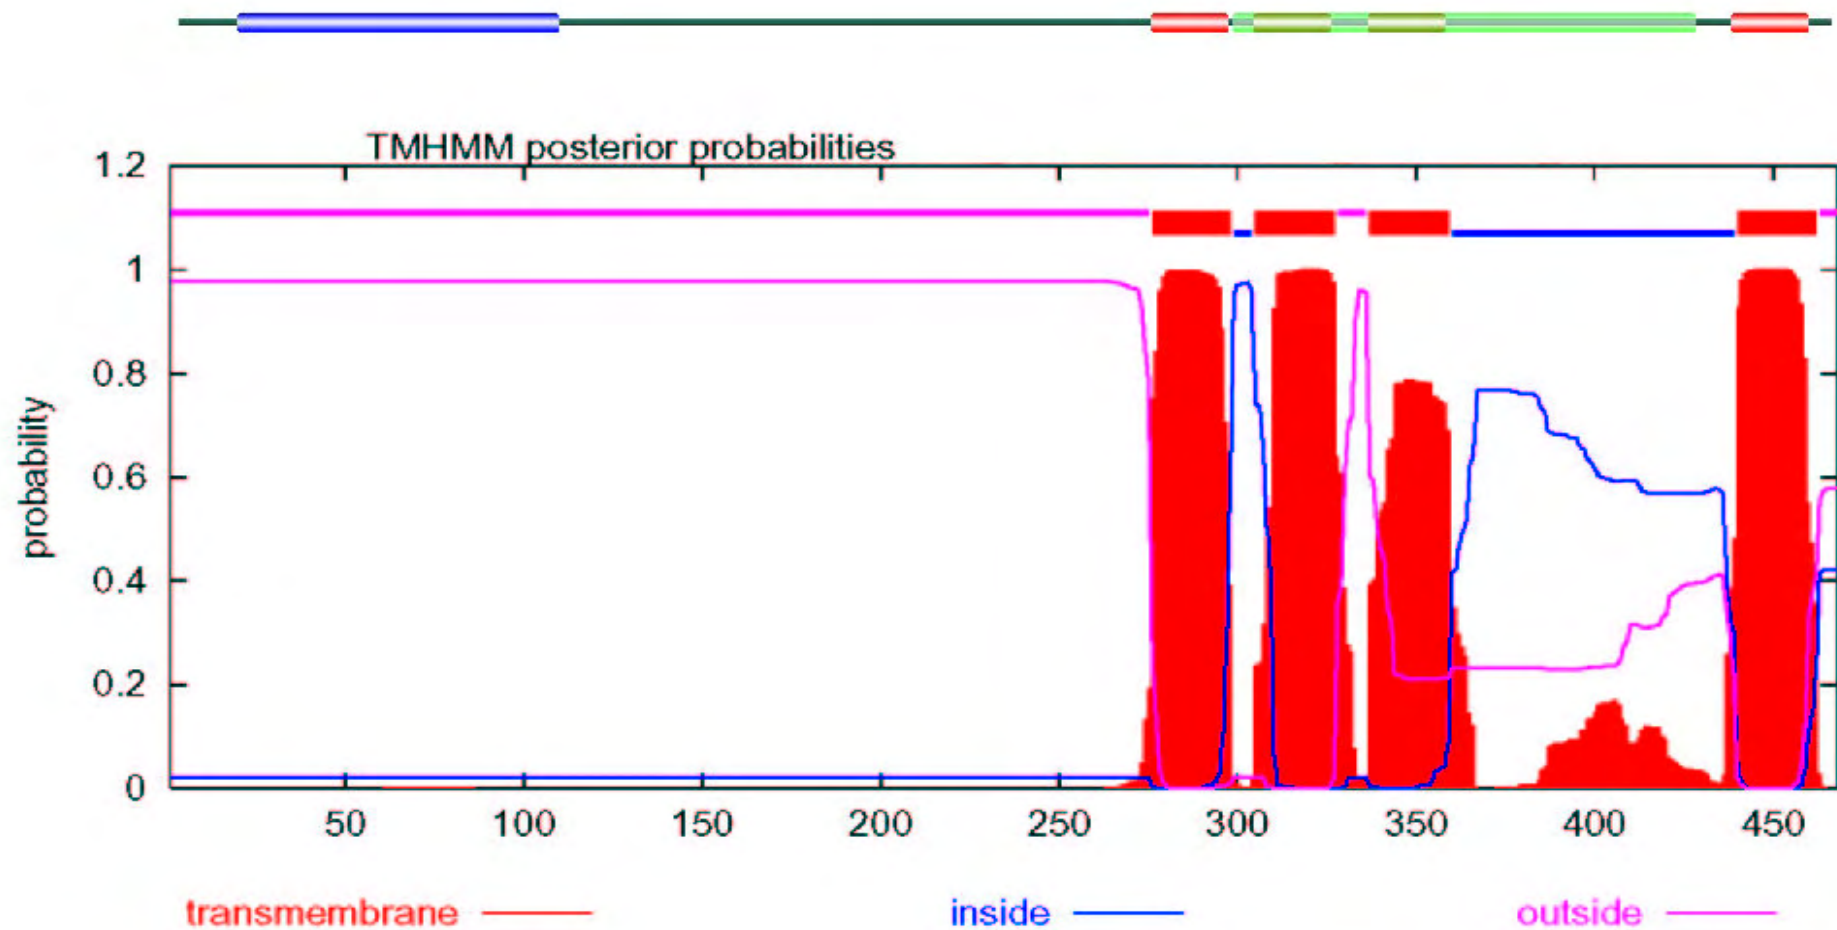

48

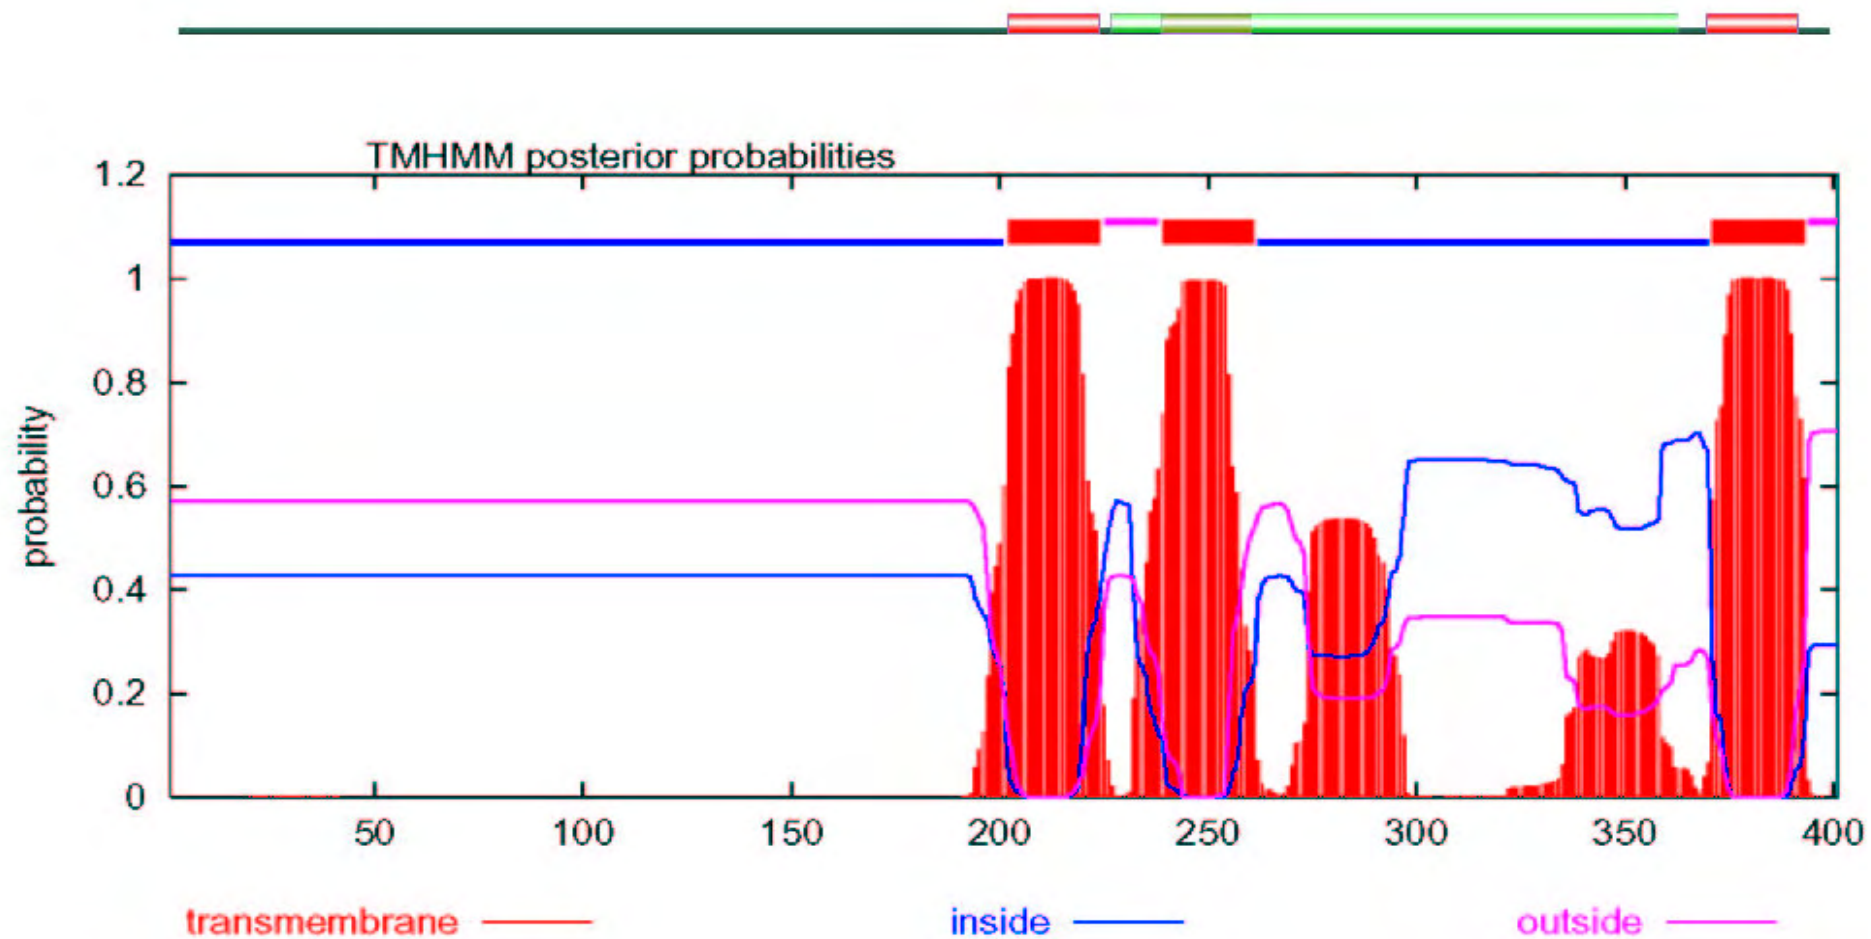

49

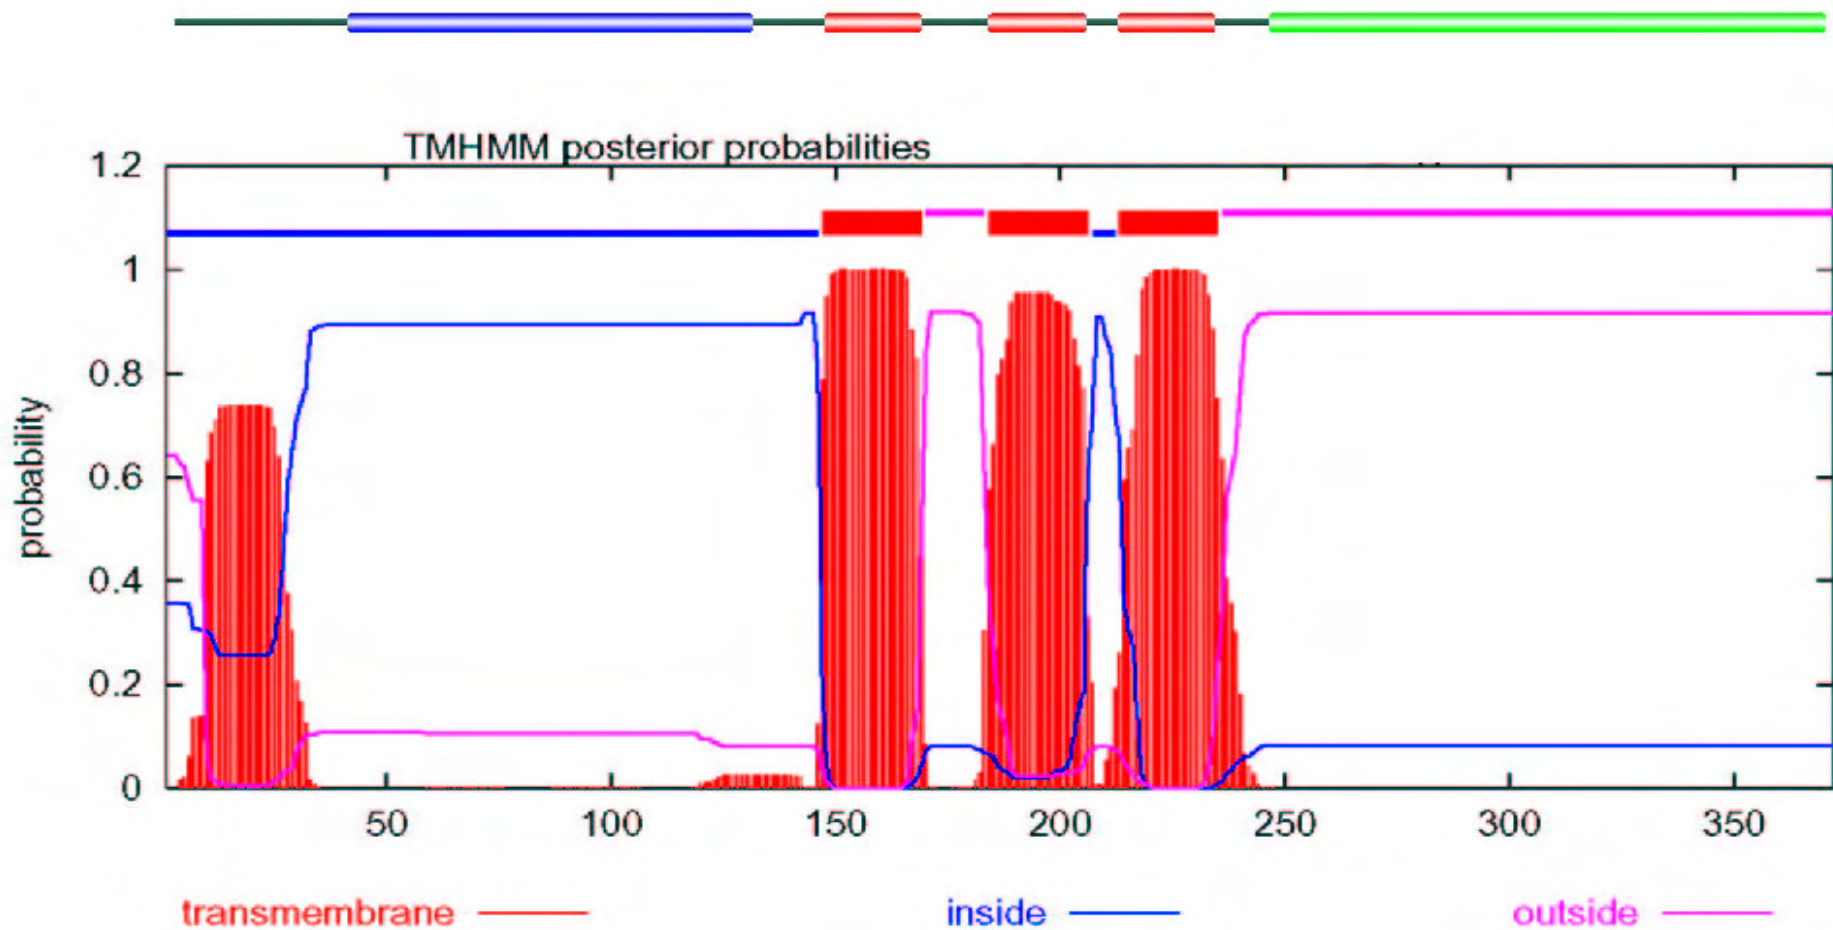

50

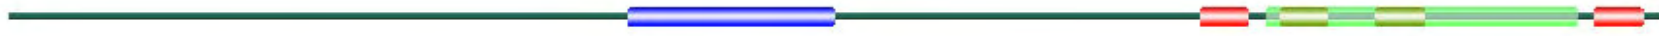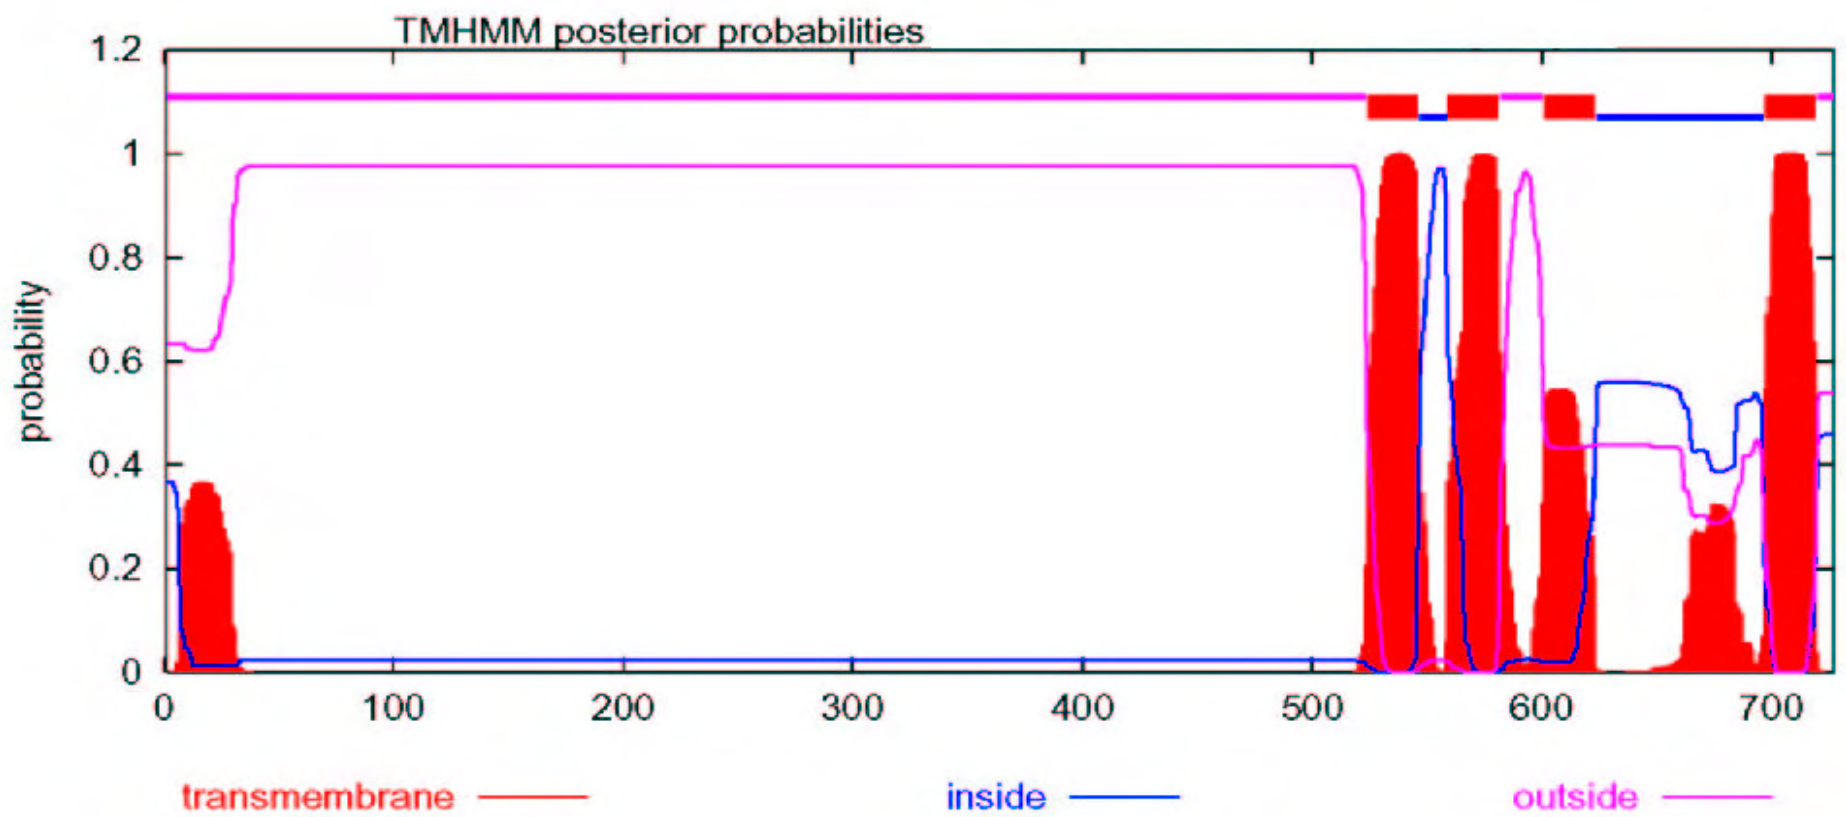

51



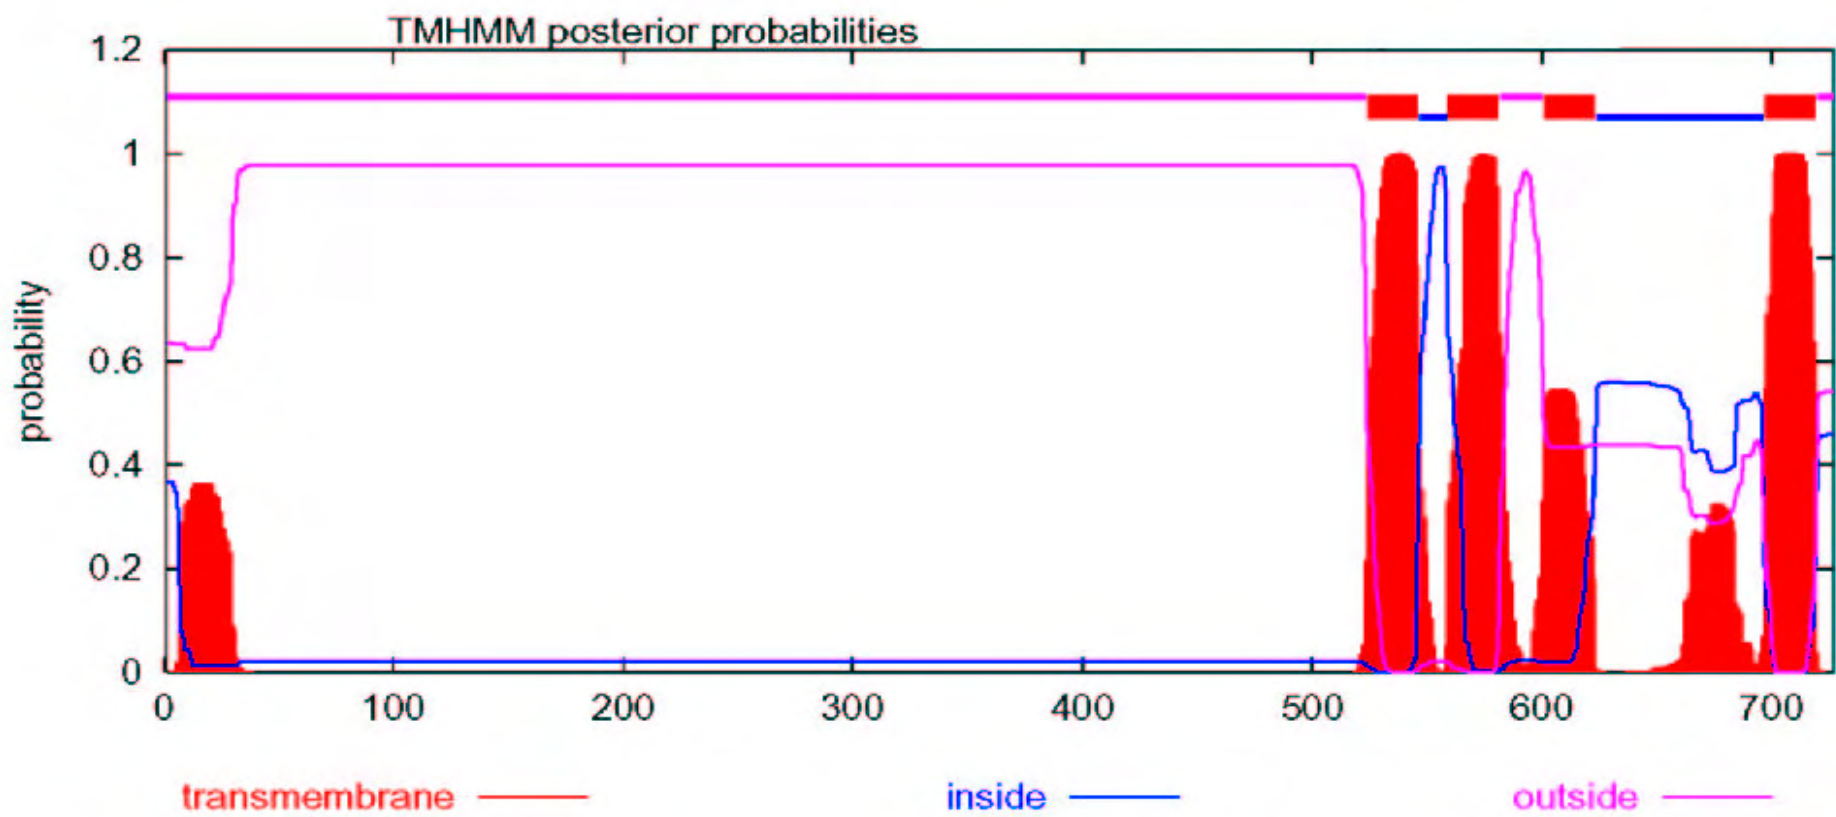

52



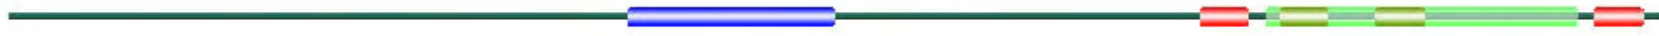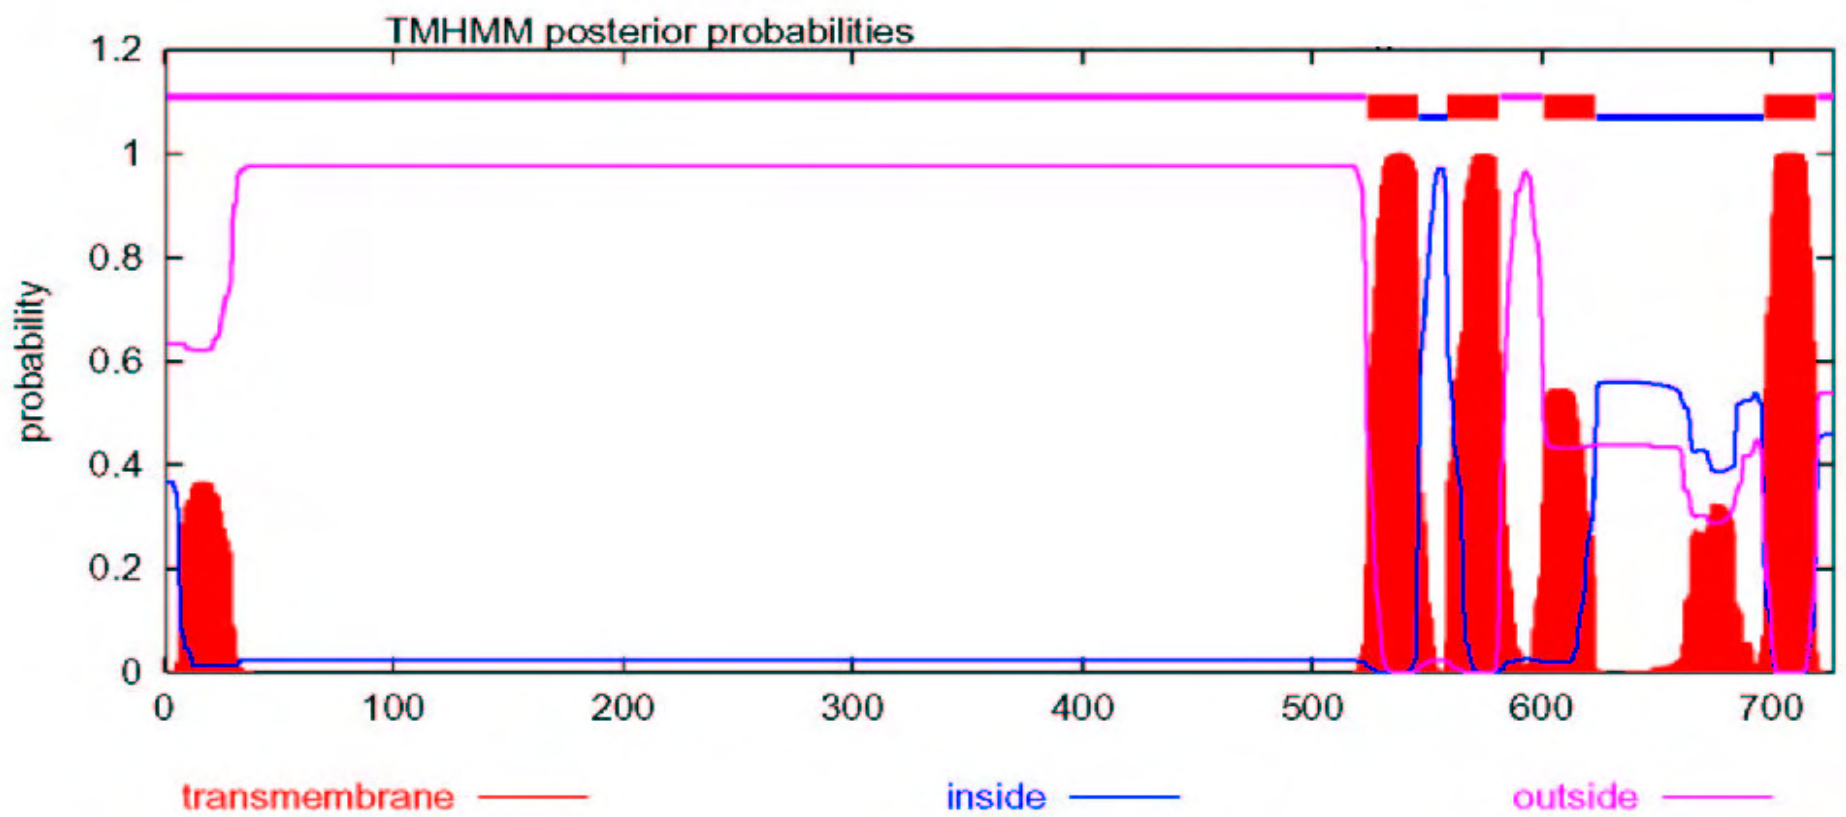

53

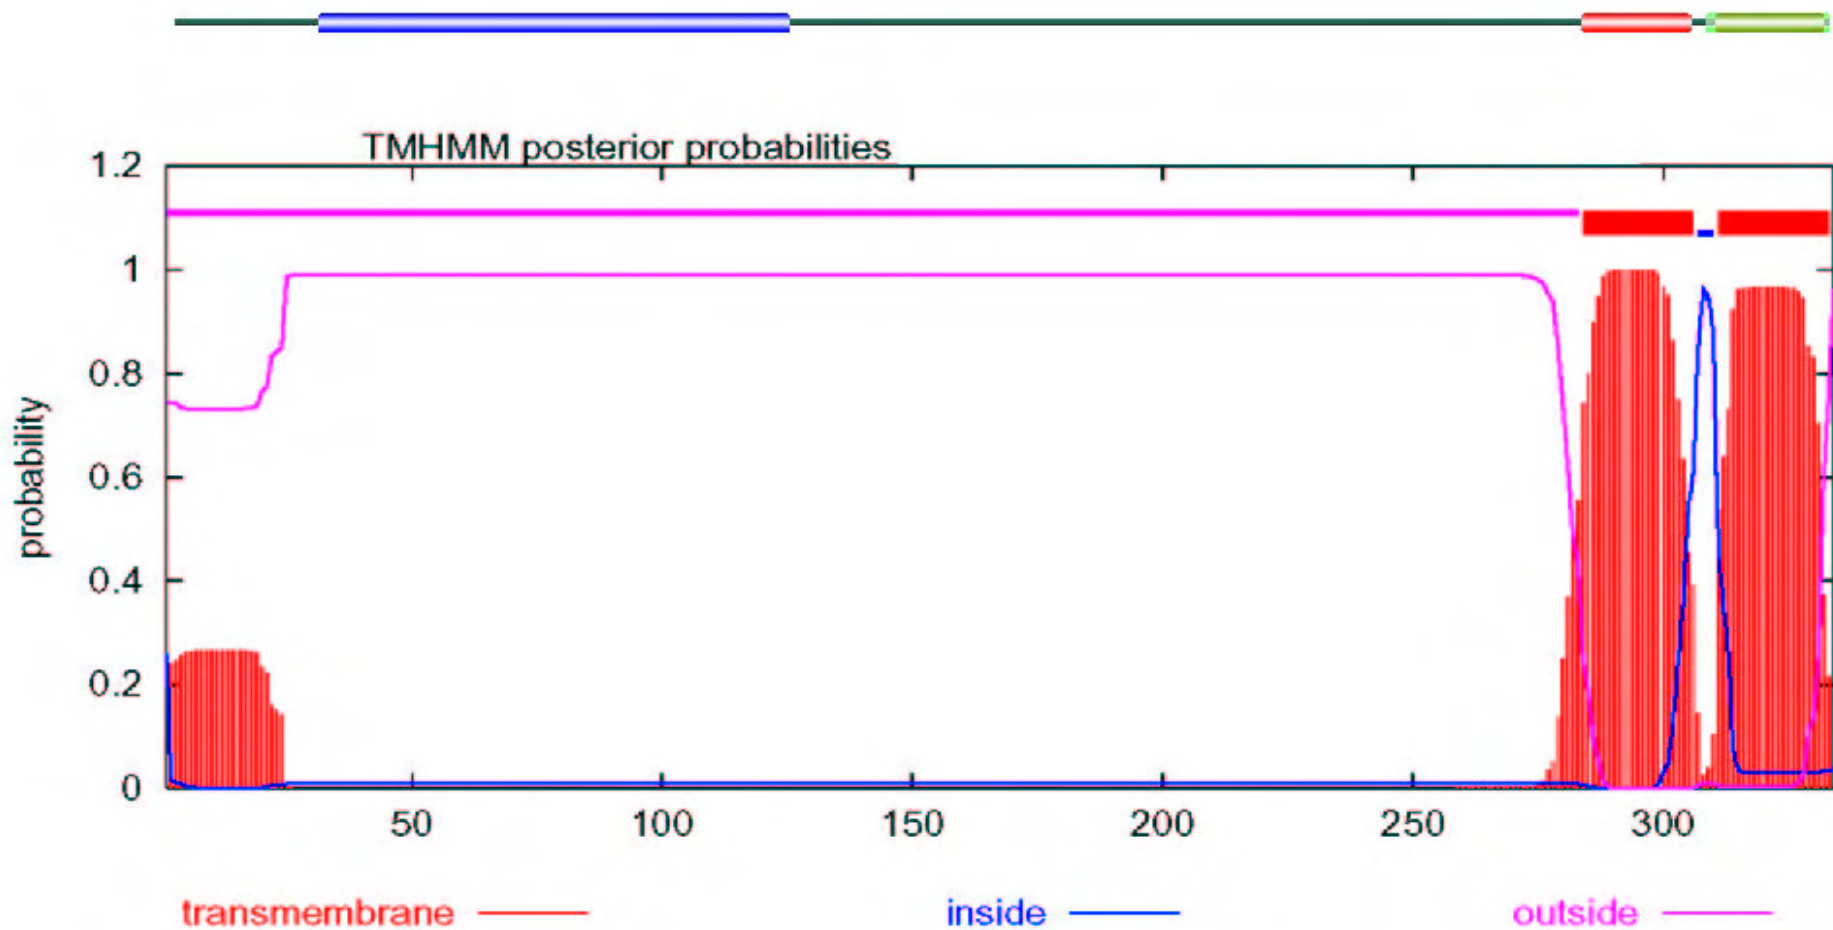

54

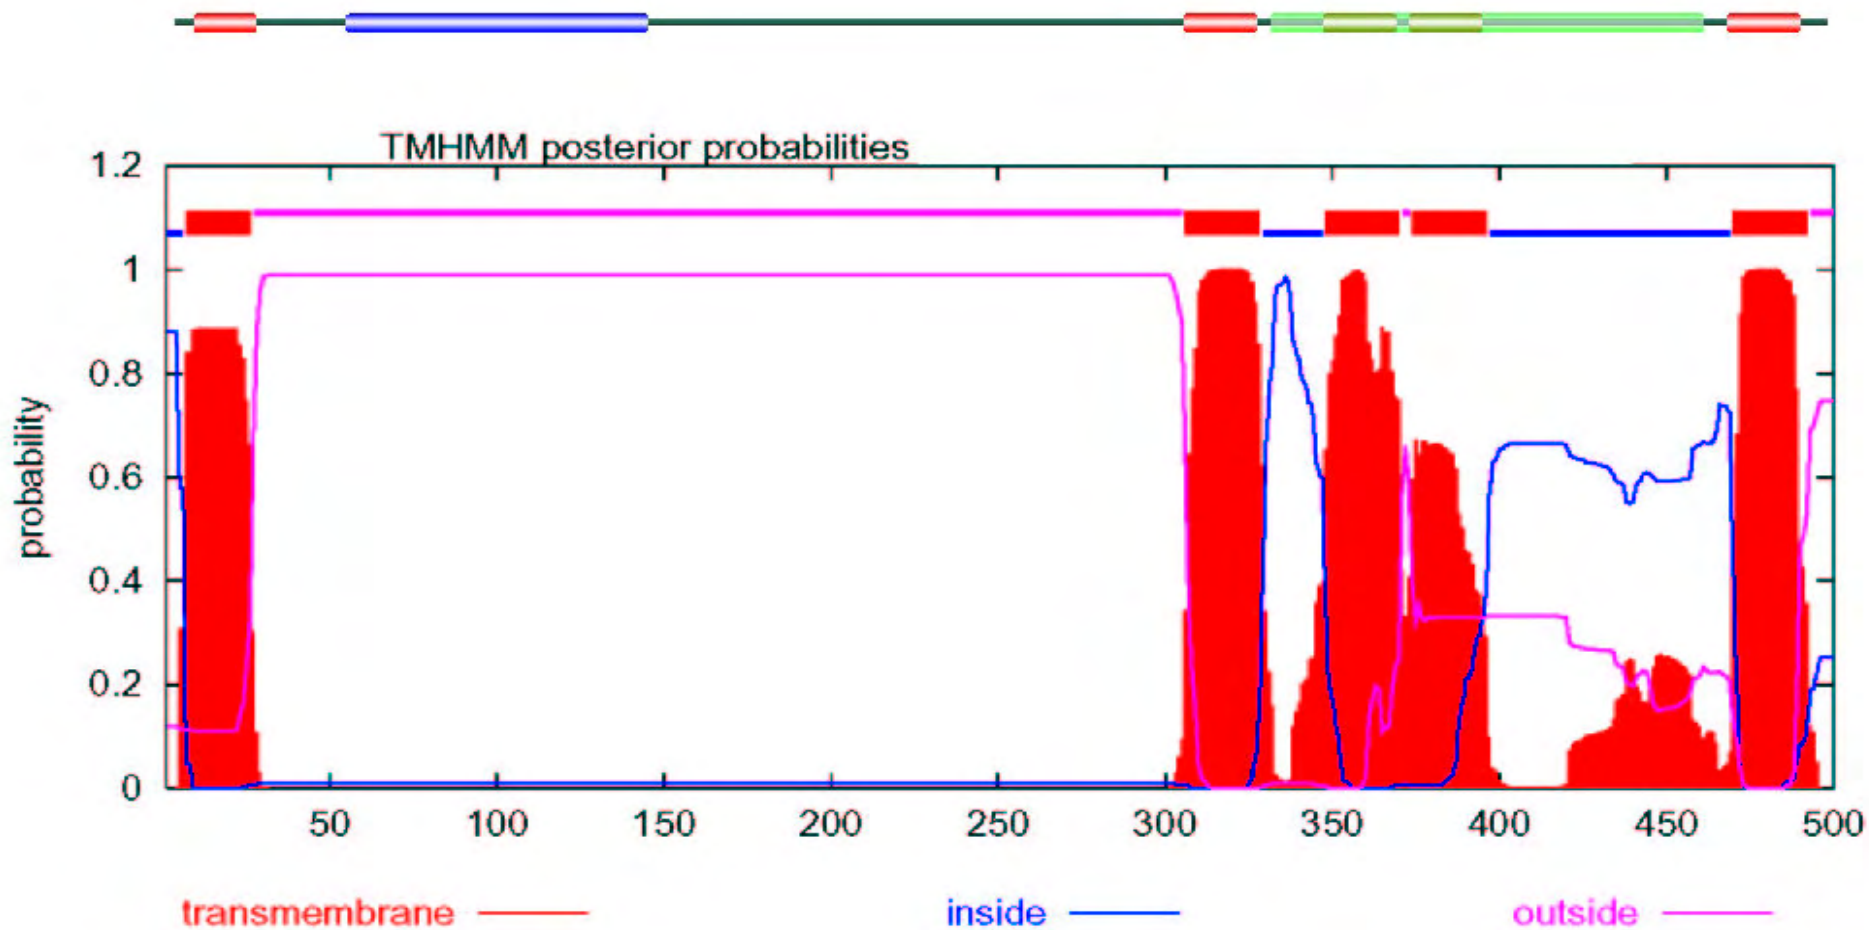

55

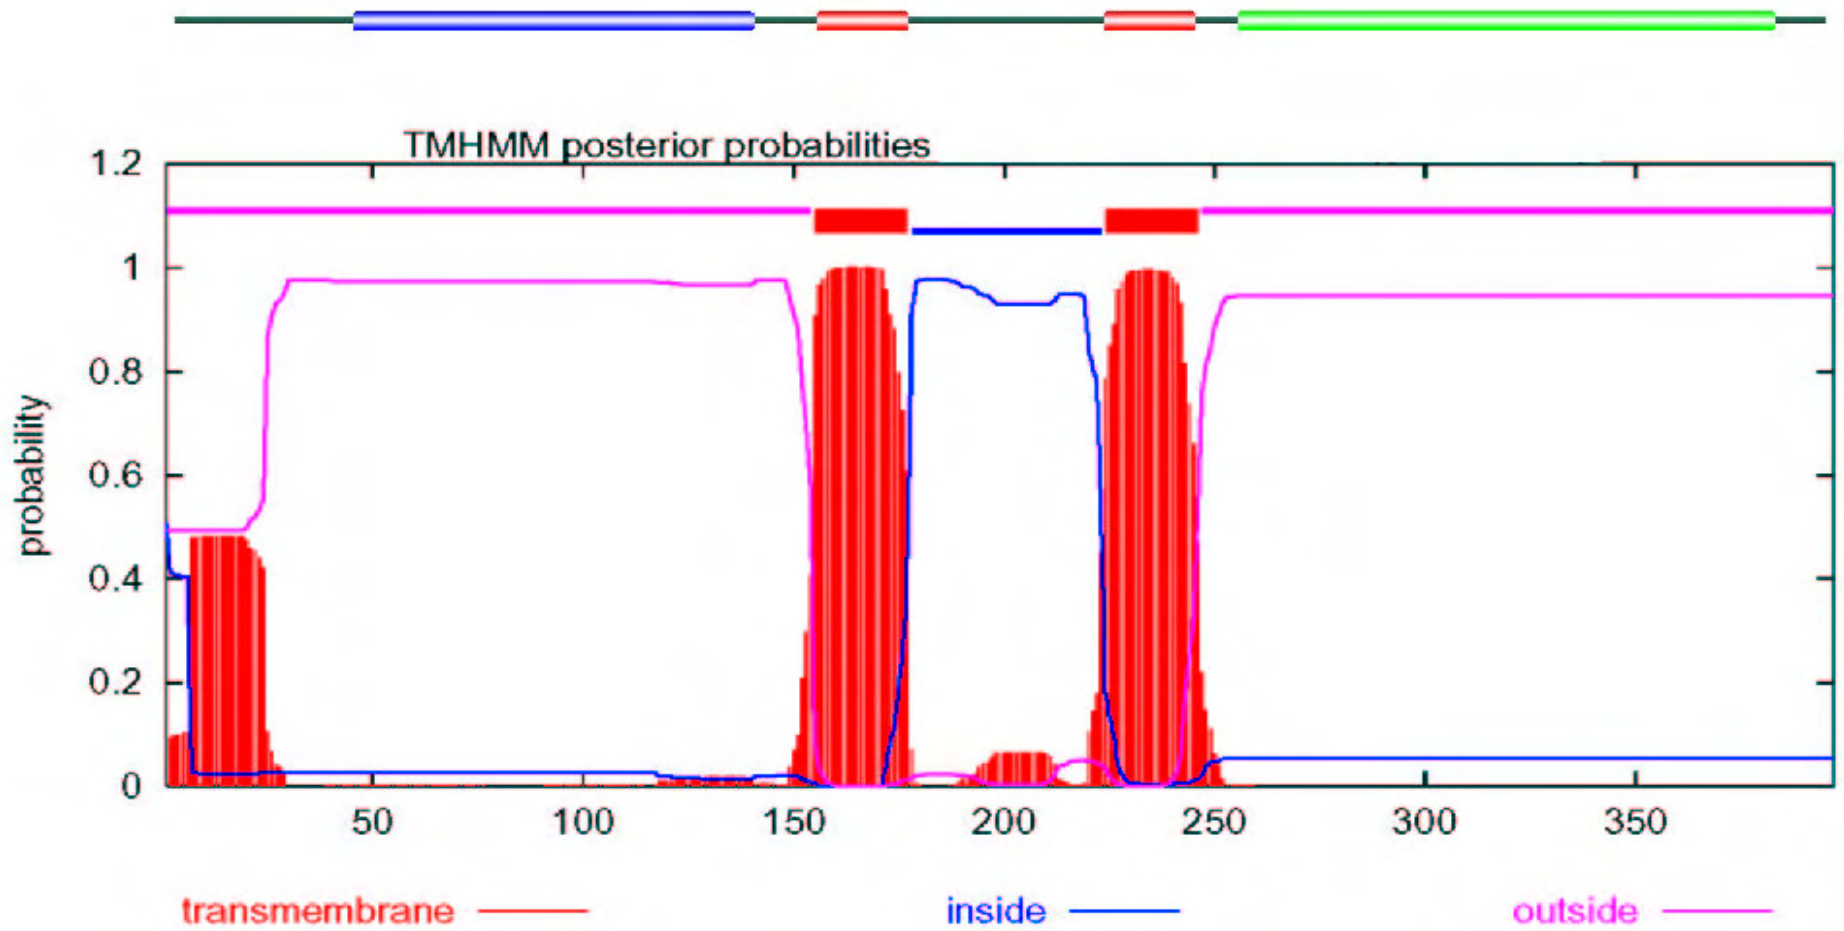

56

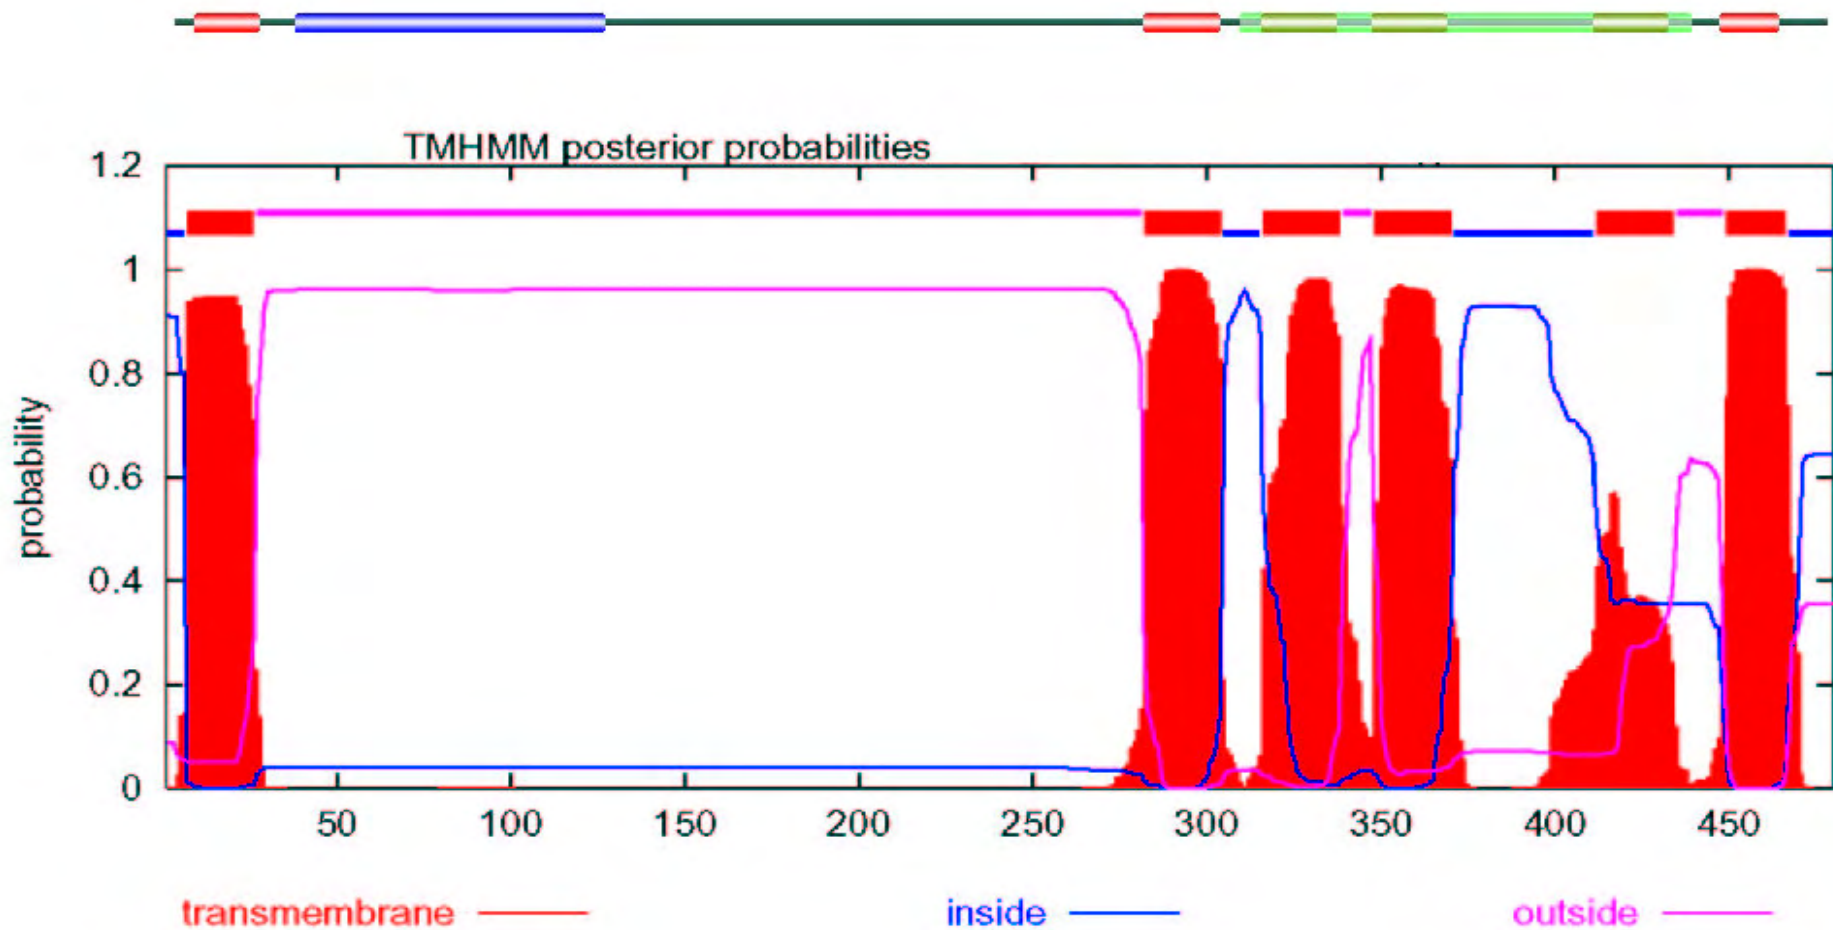

57

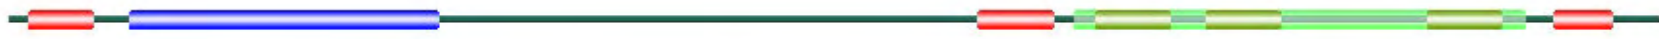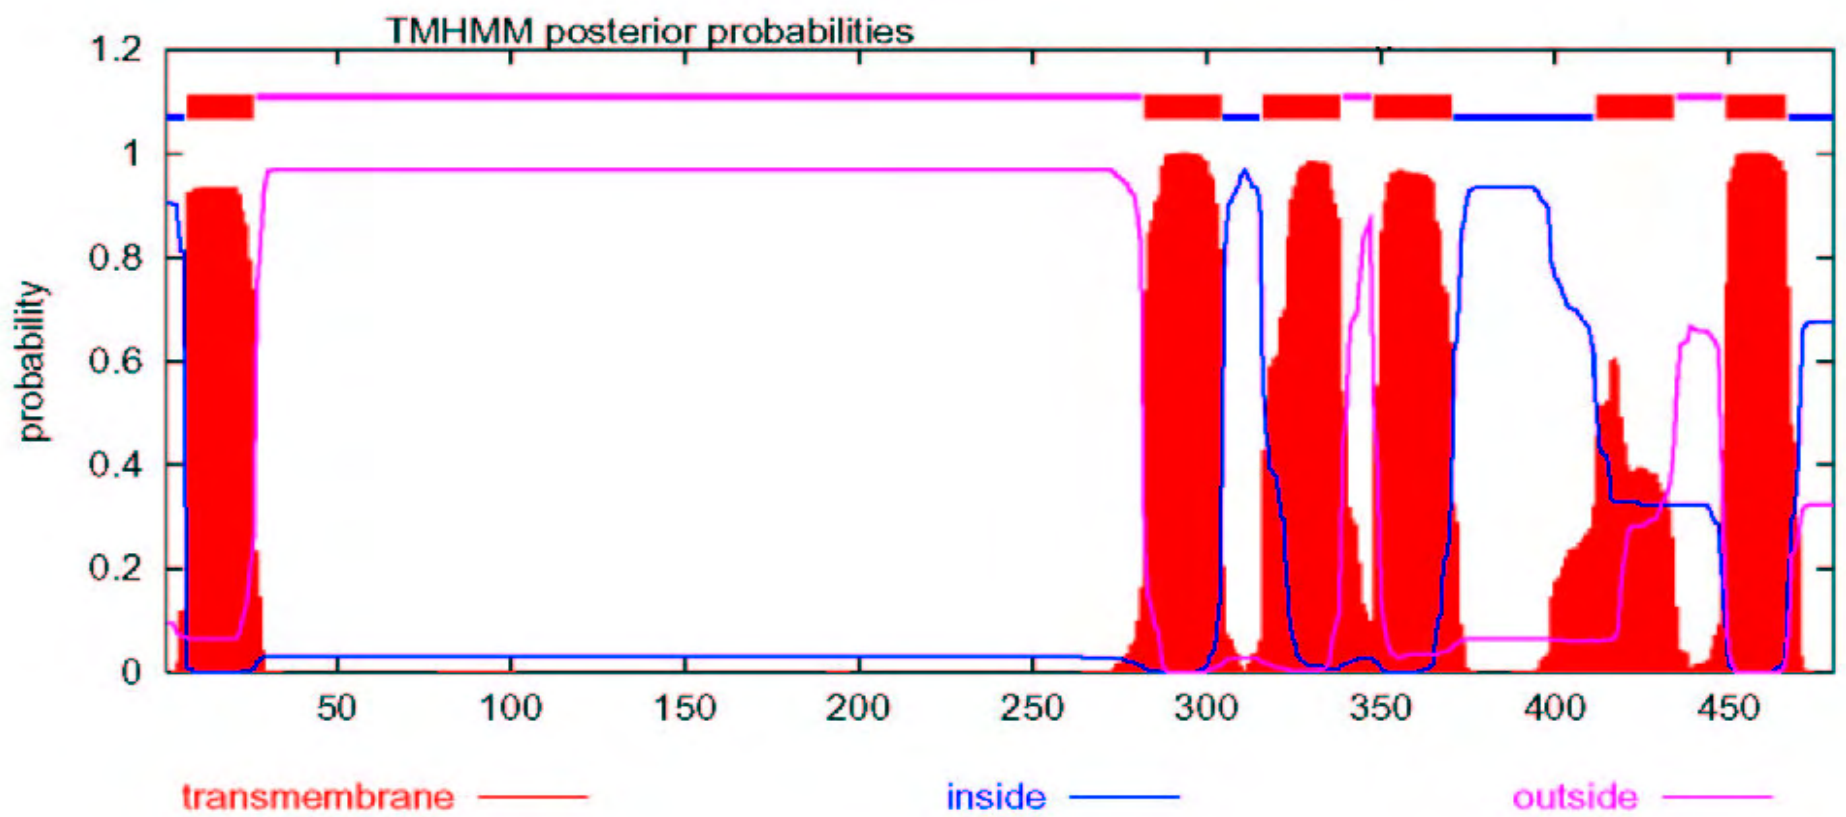

58



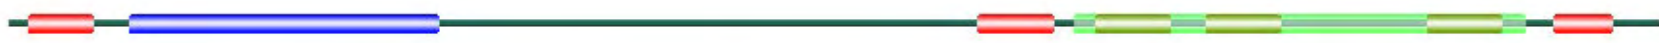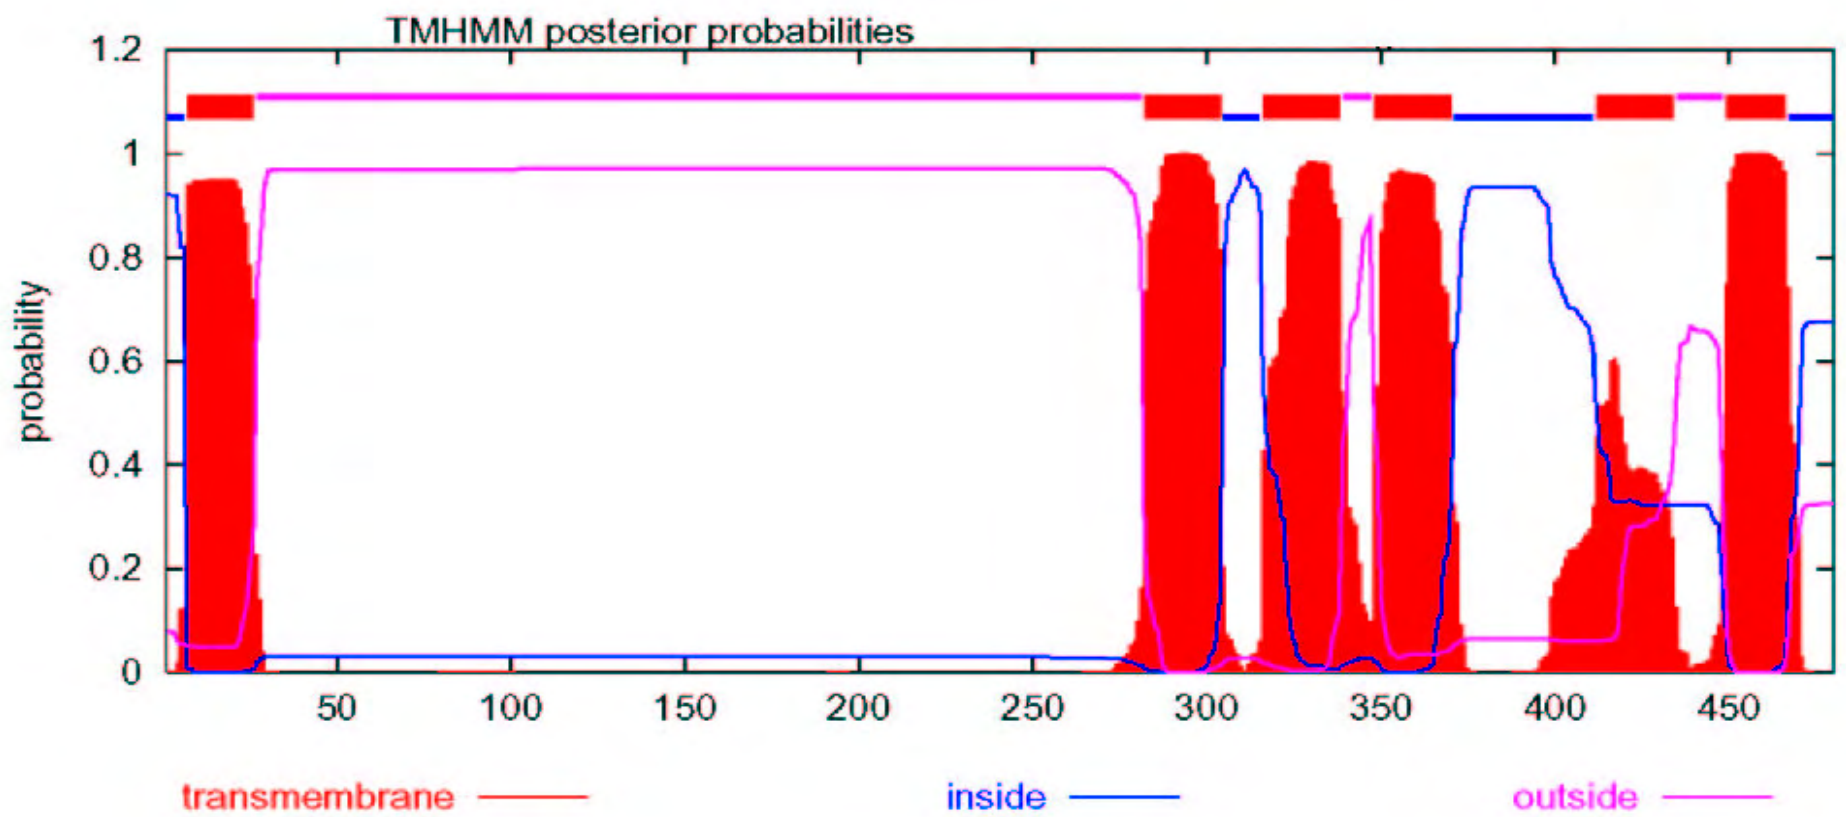

59



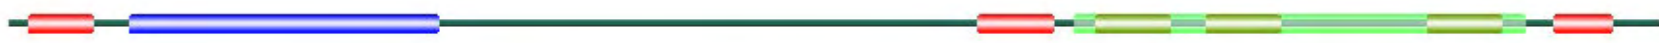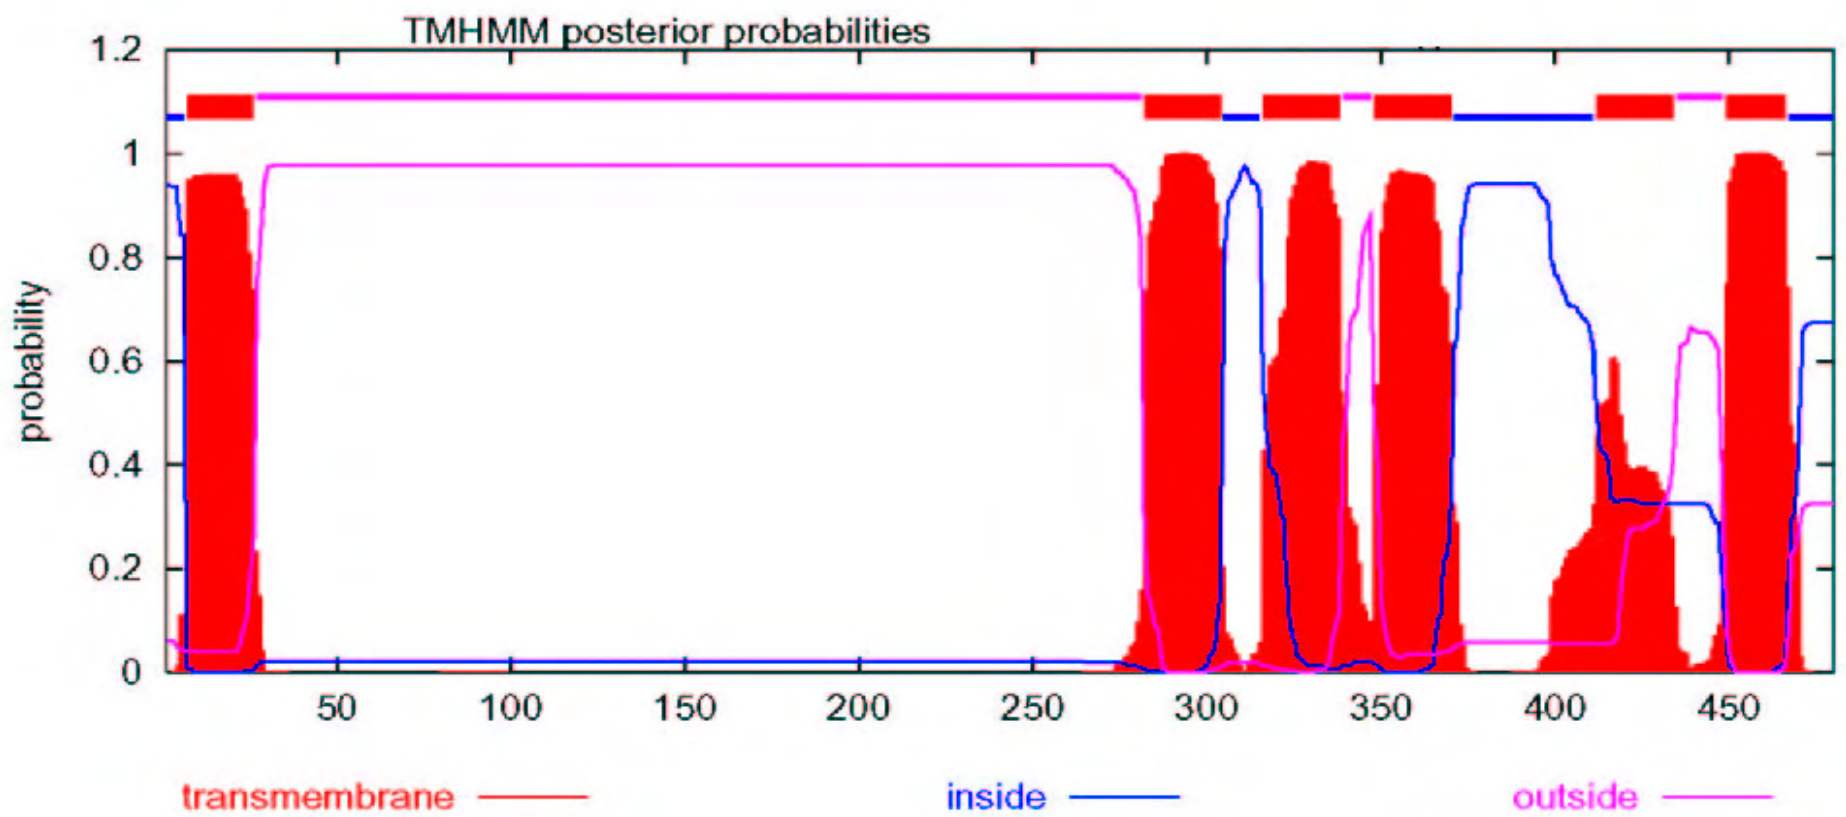

60

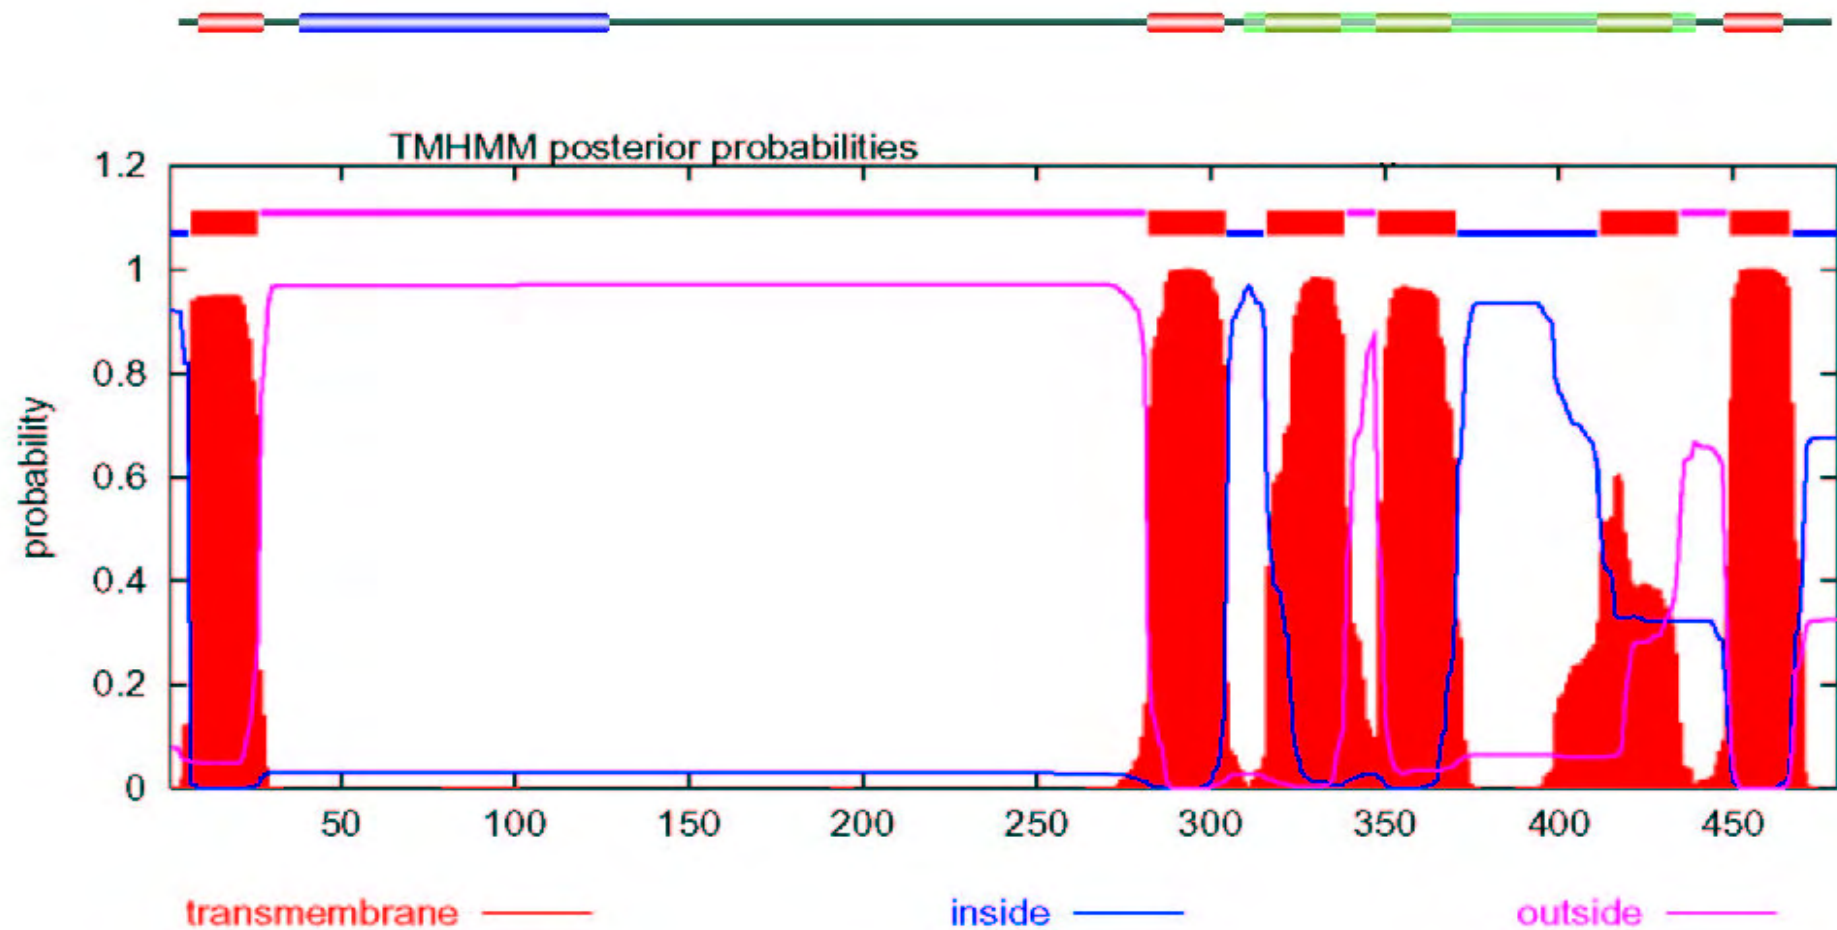

61

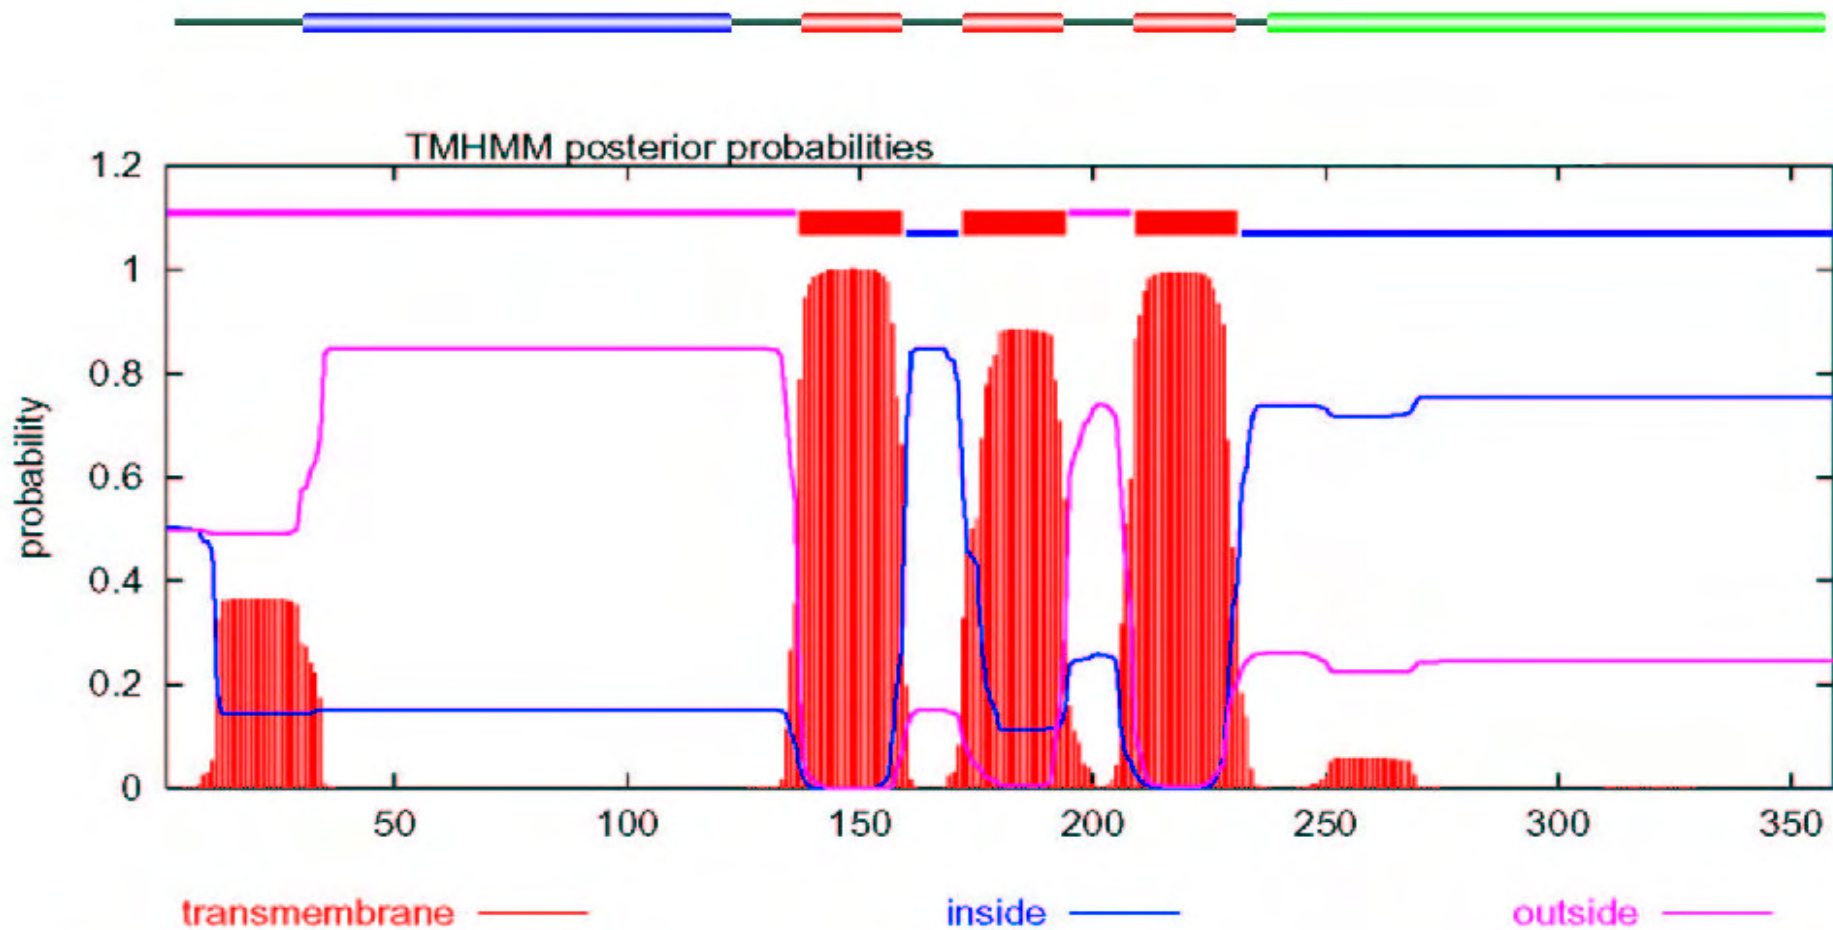

62

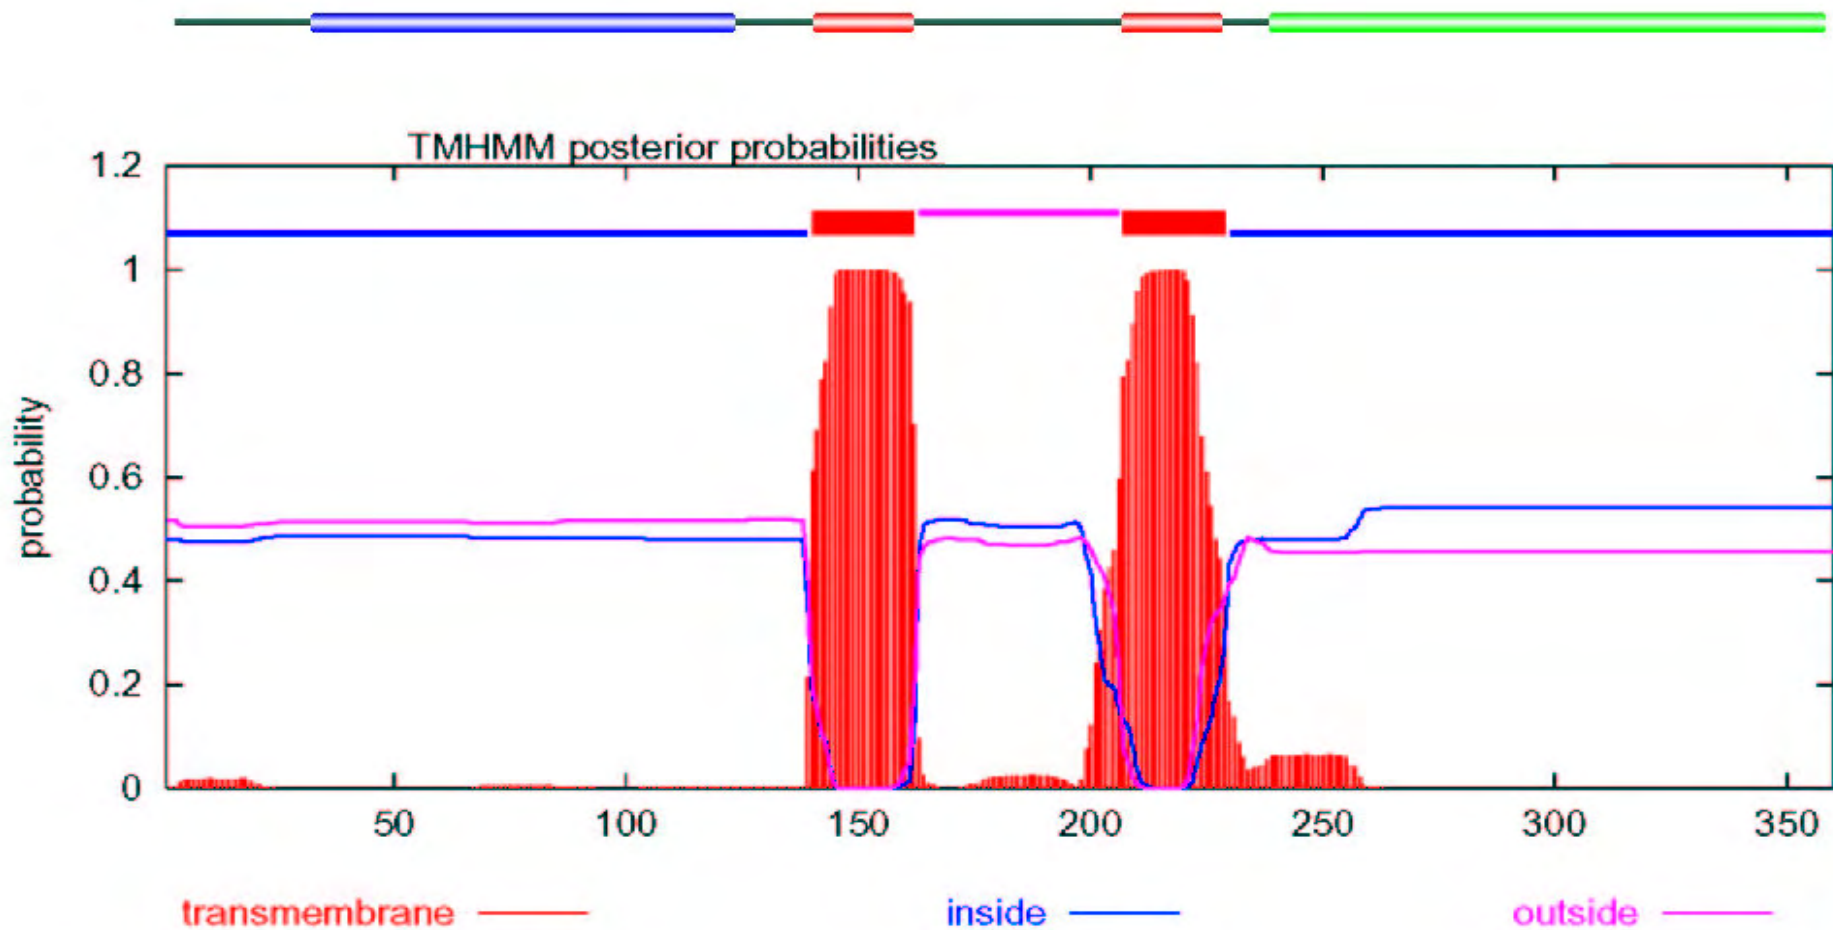

63

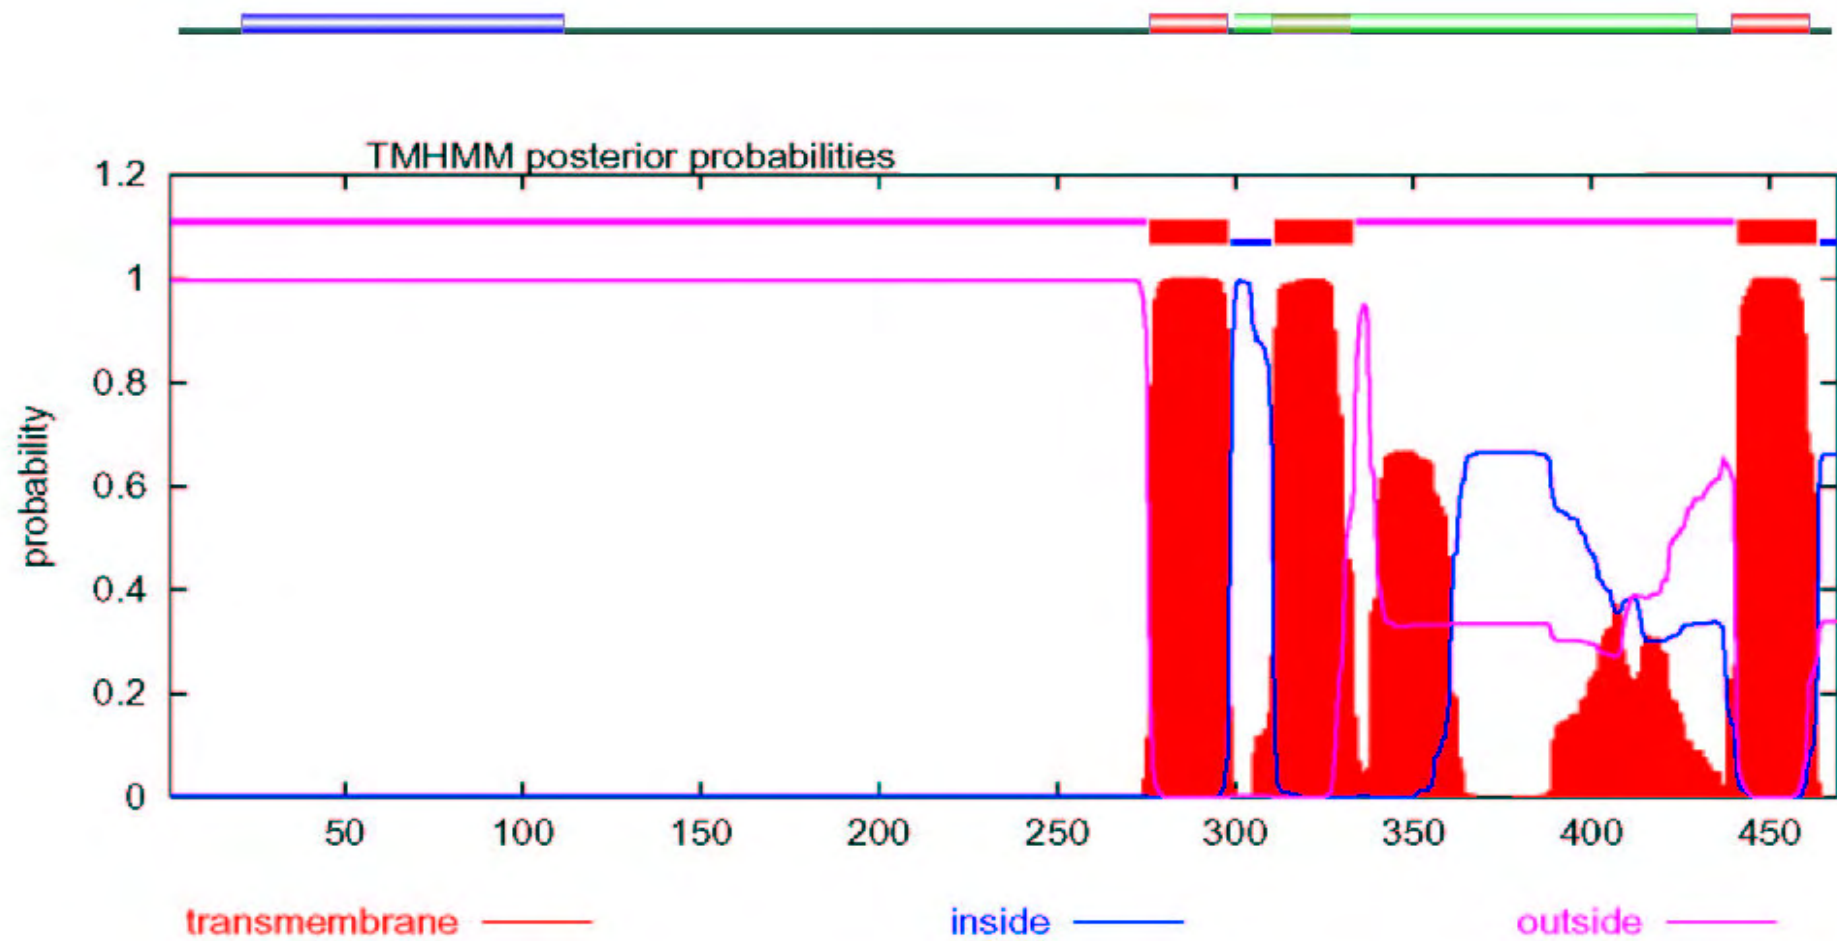

64

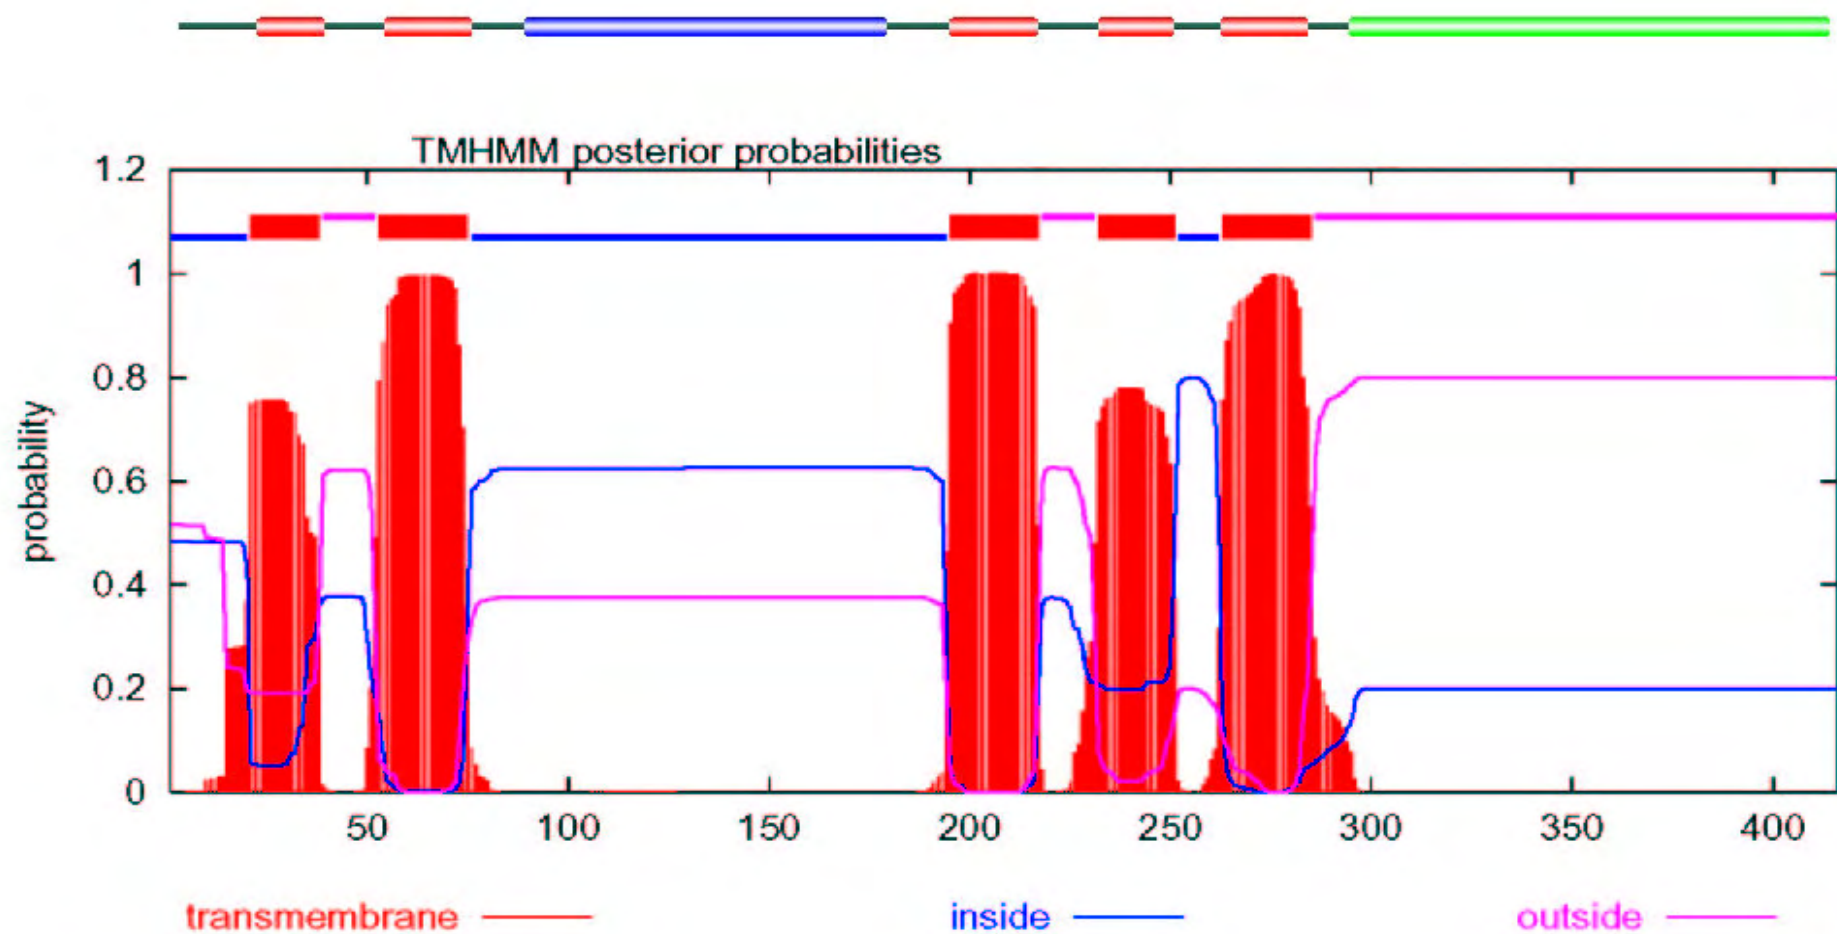

65



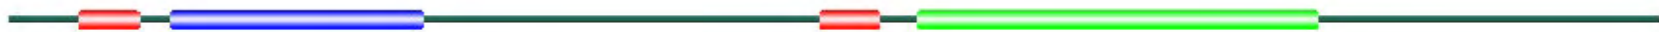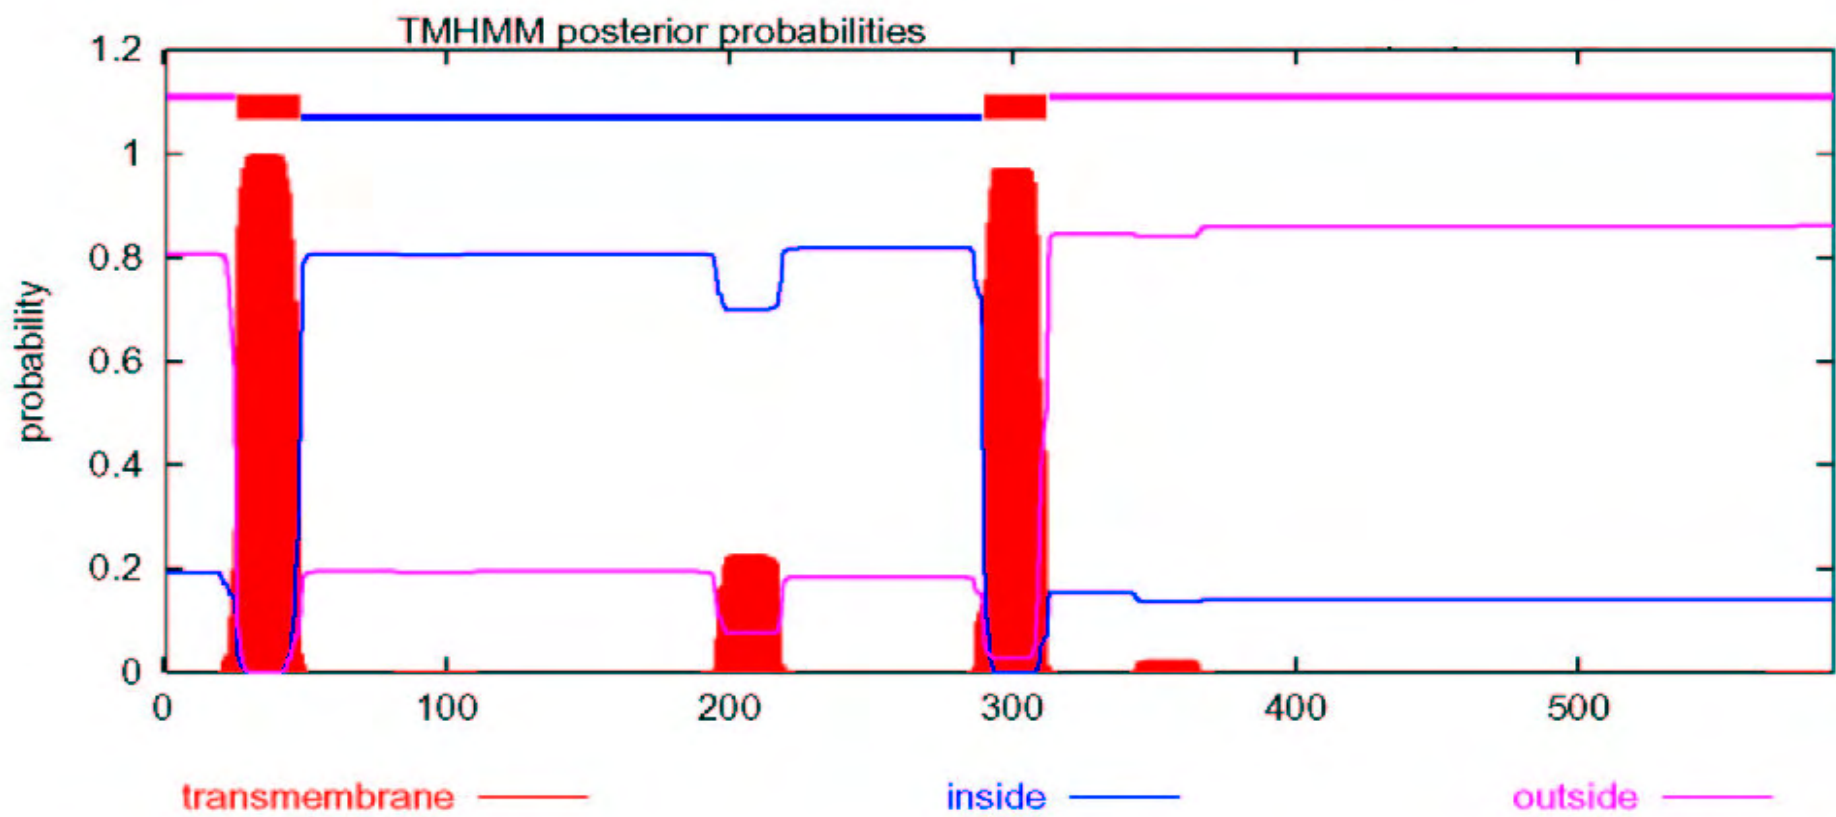

66



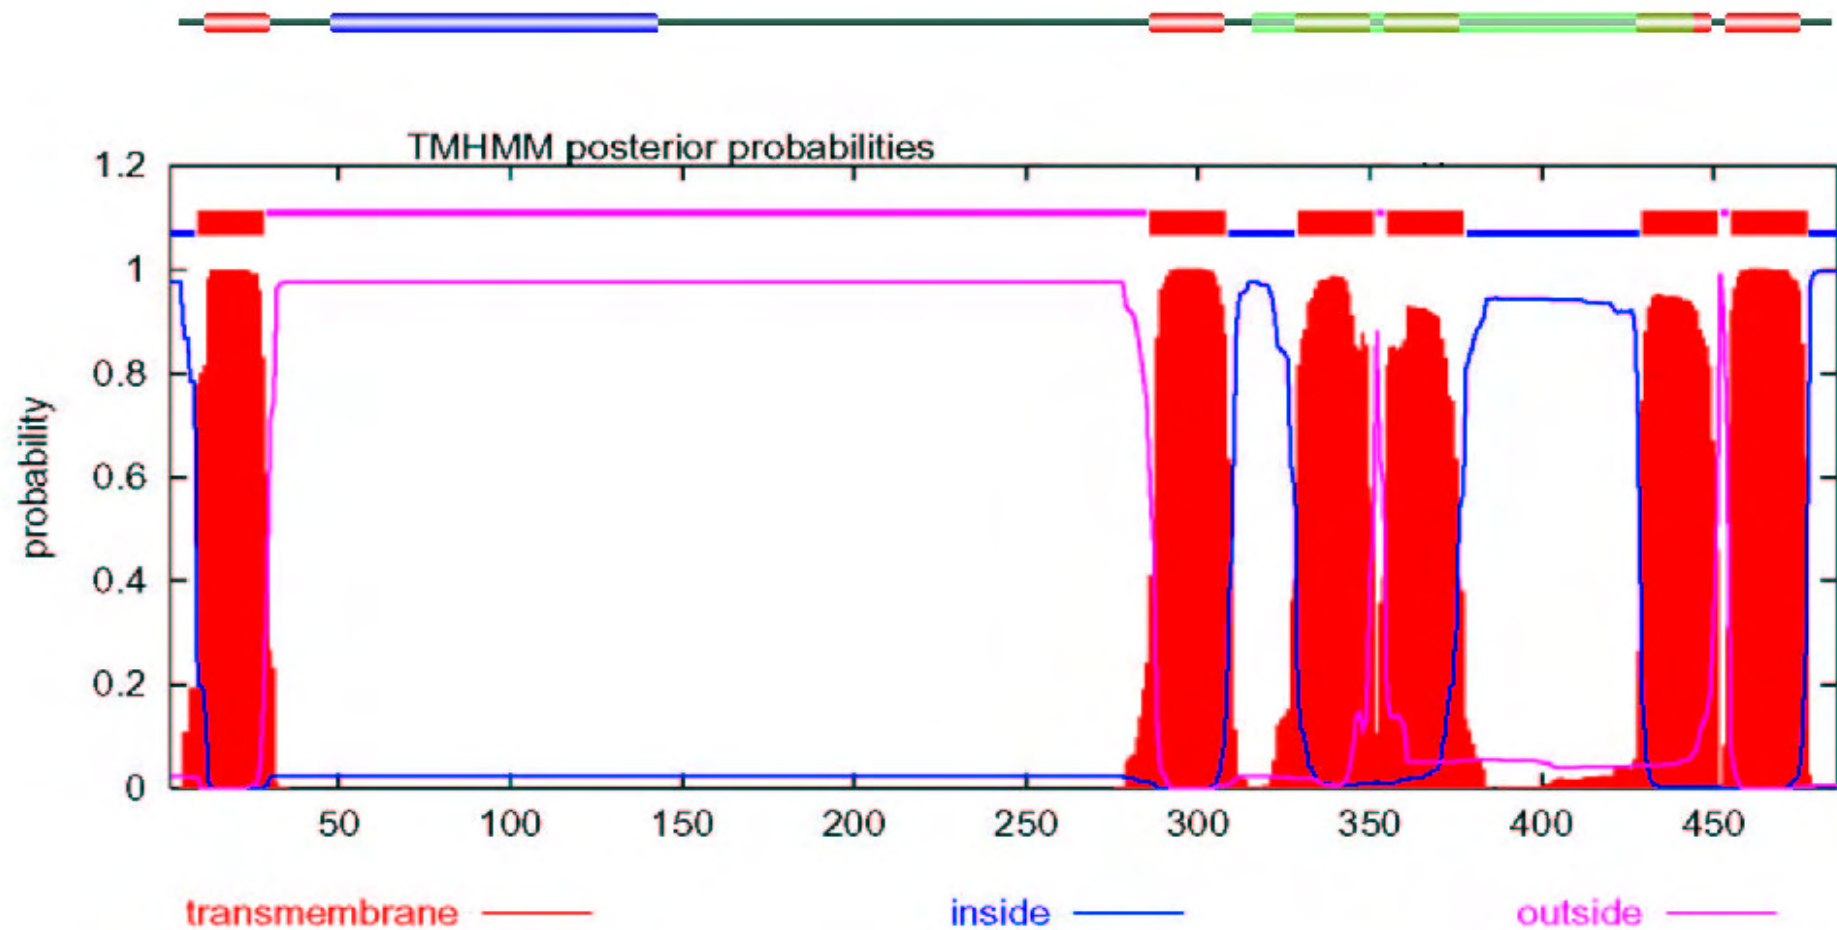

67

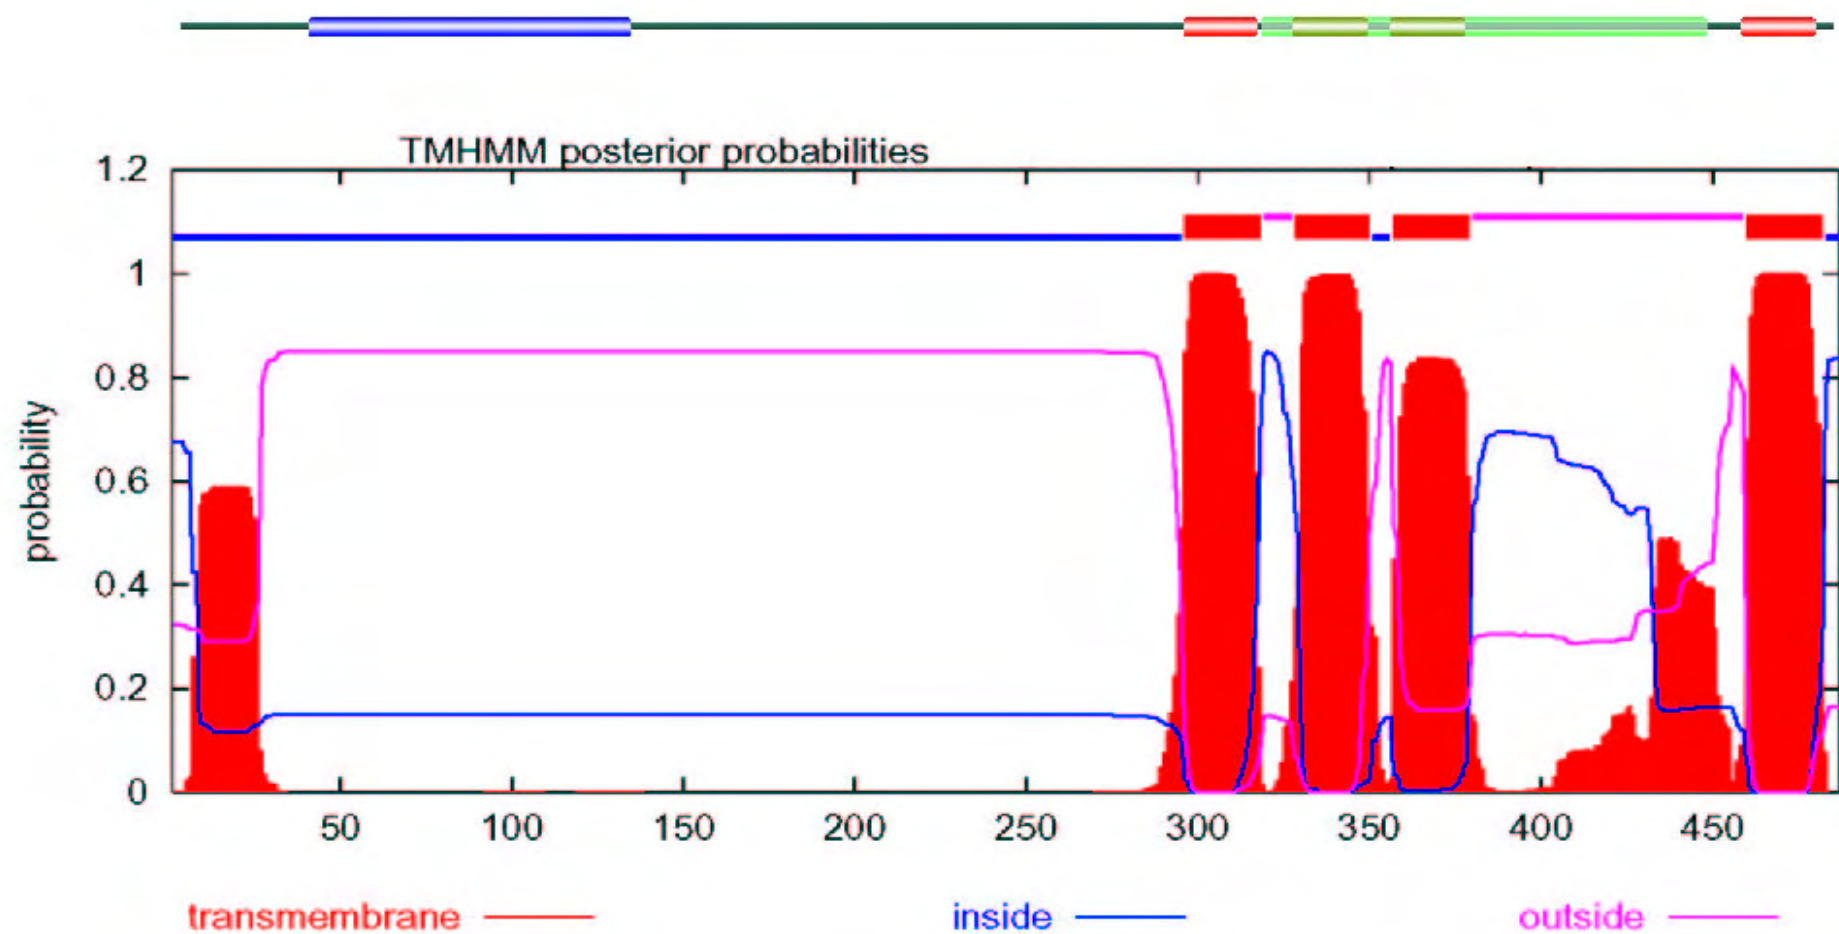

68

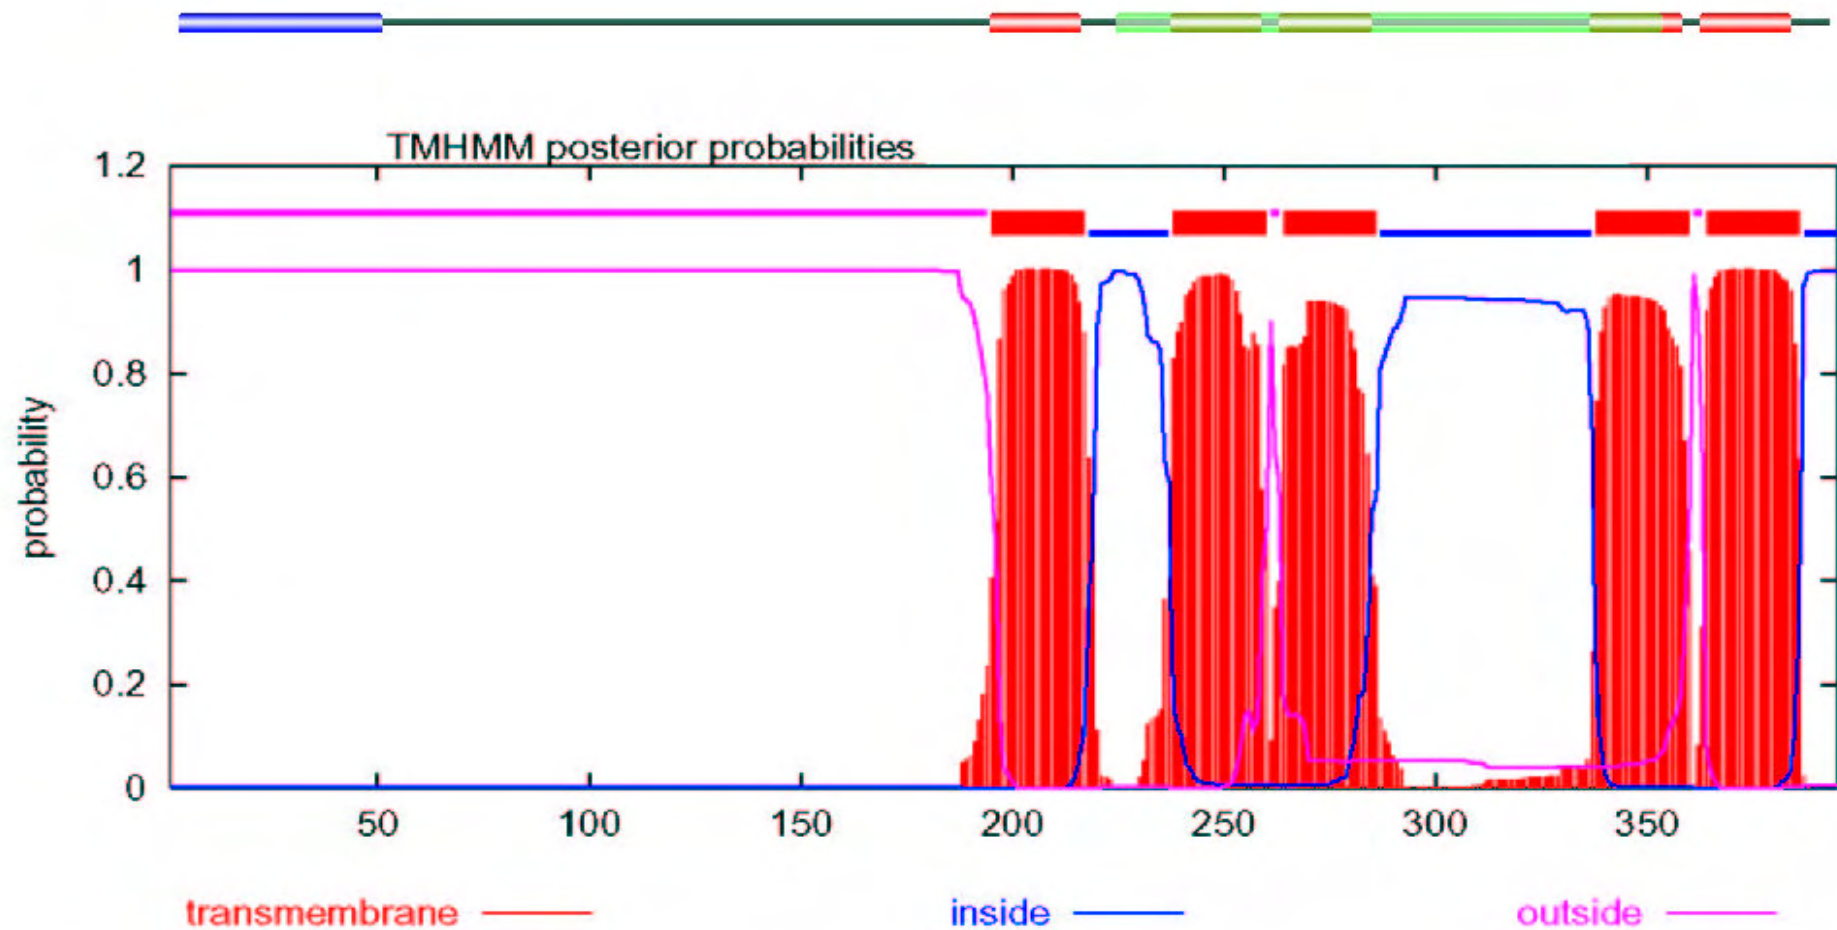

69

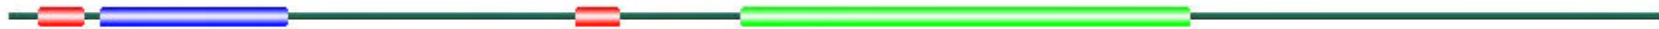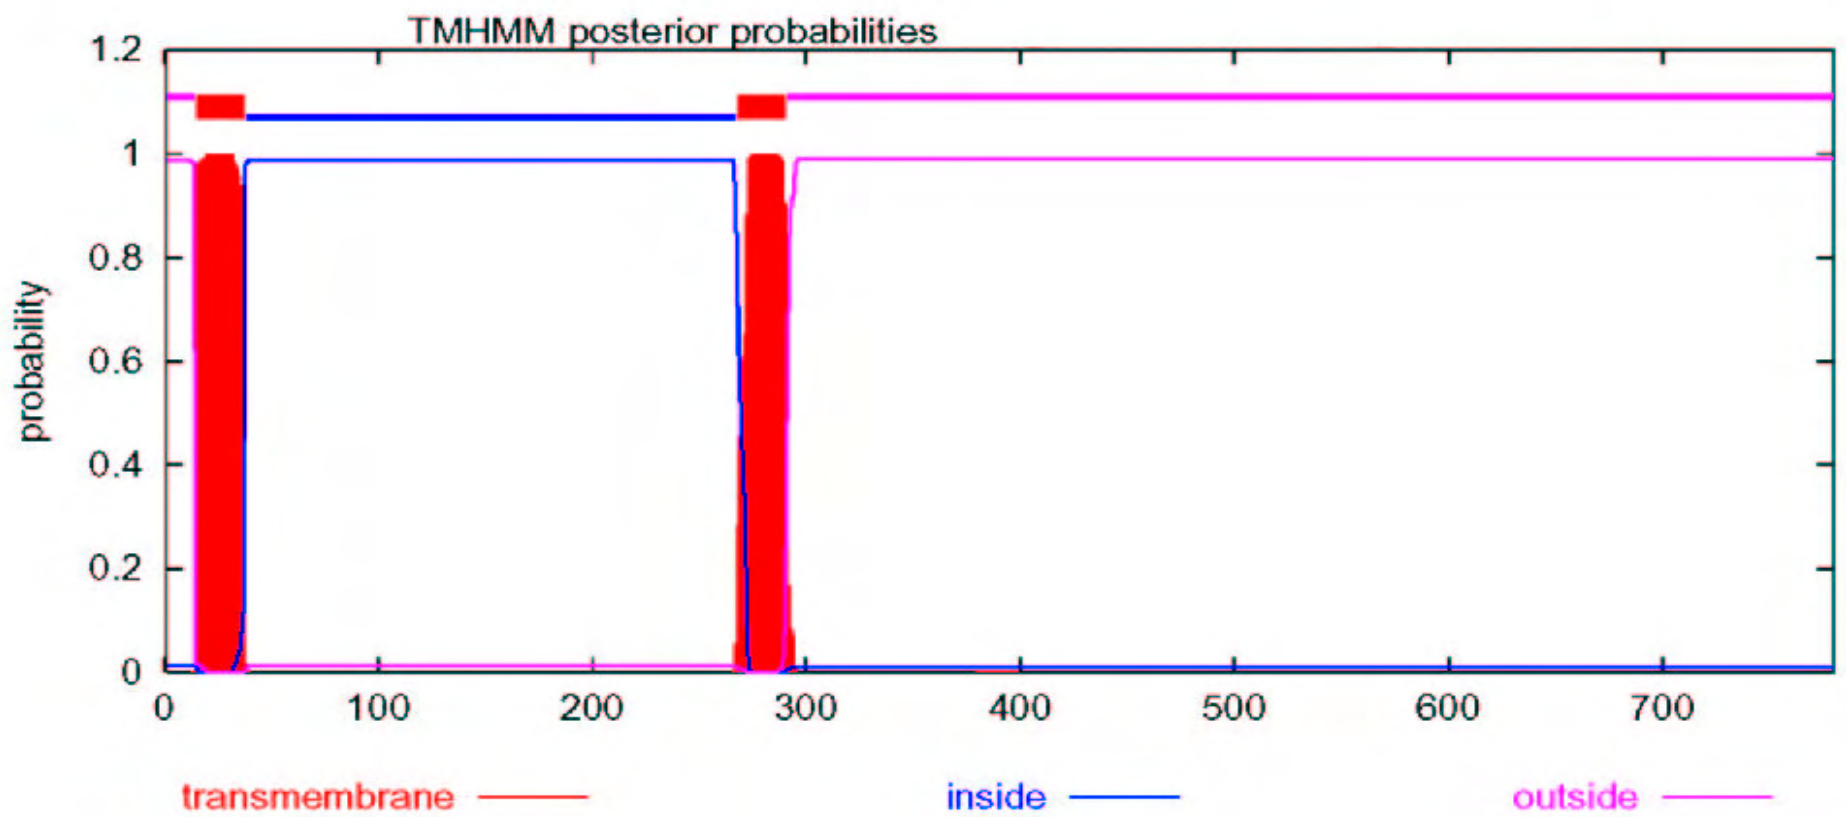

70

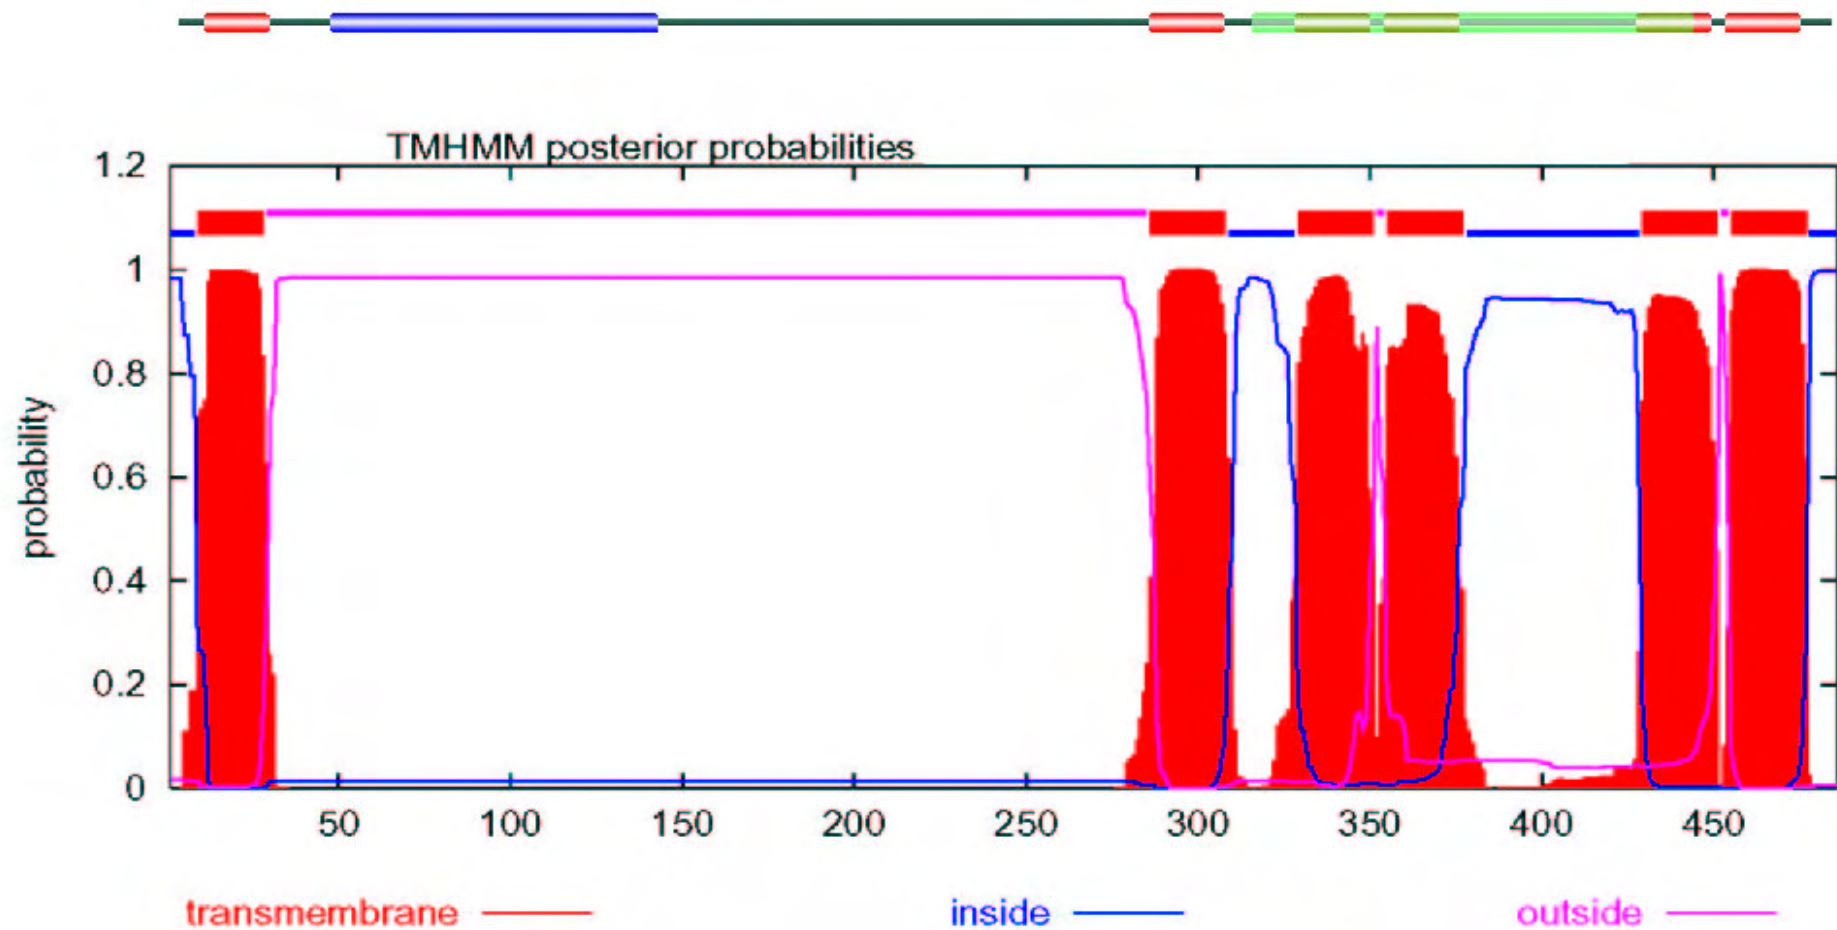

71

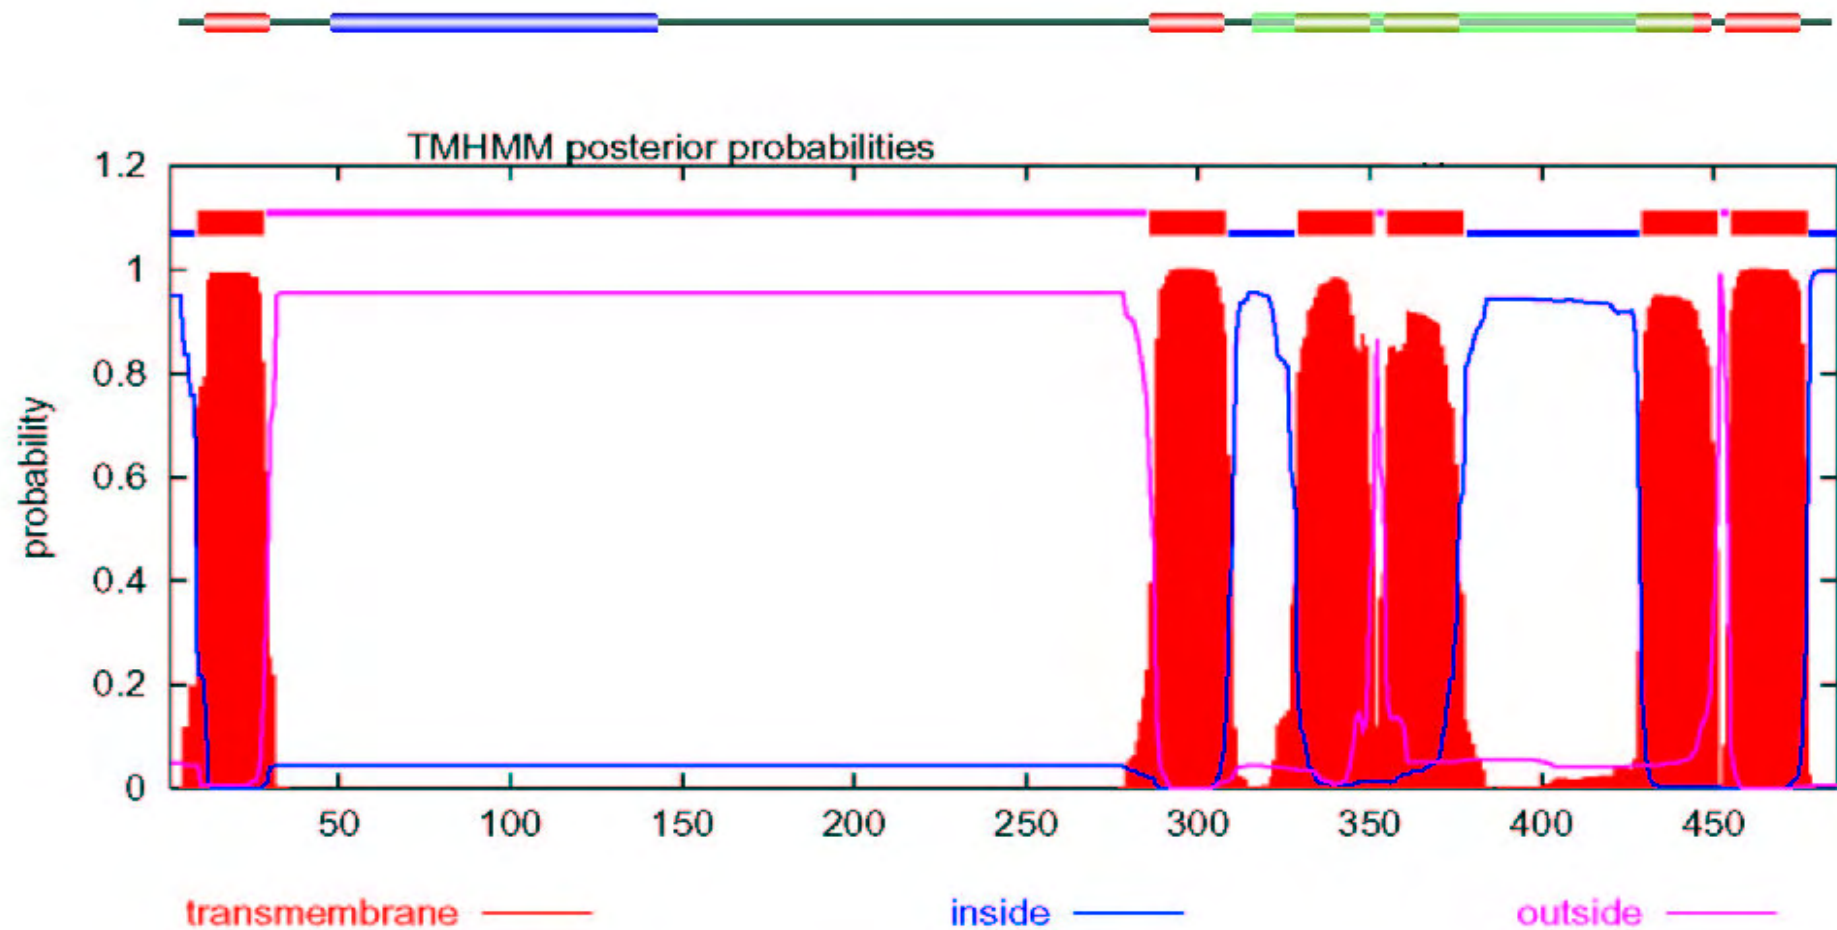

72



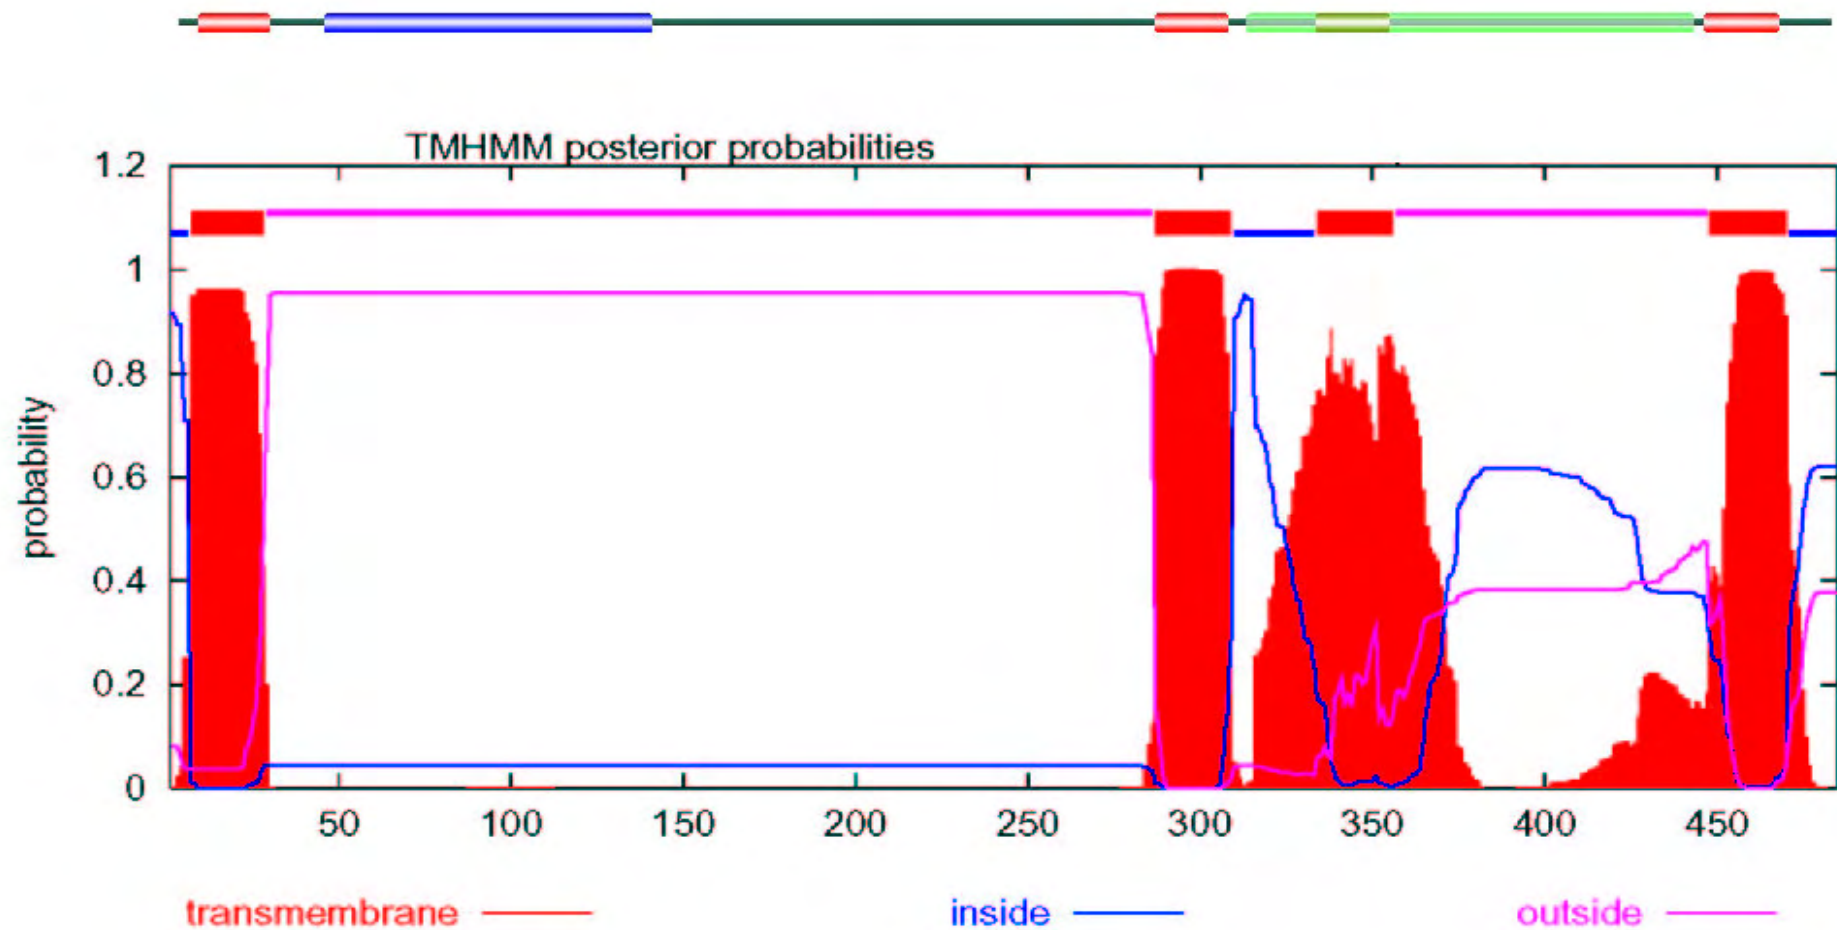

73

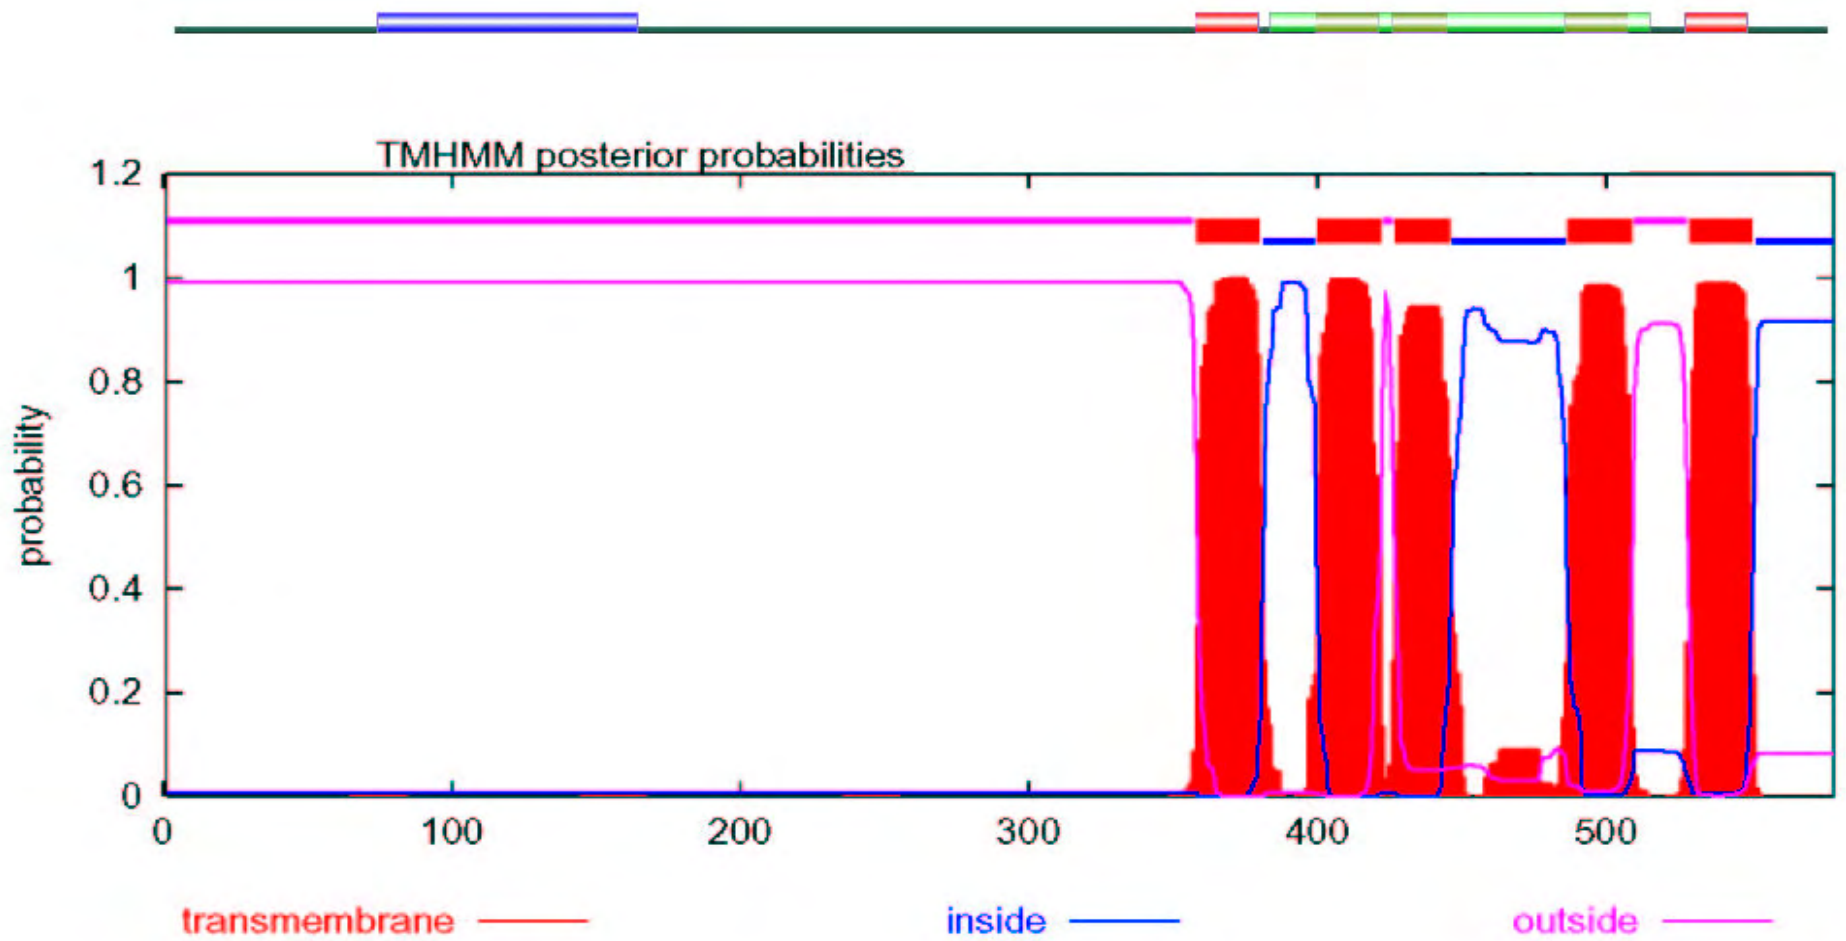

74

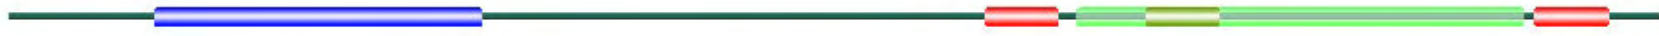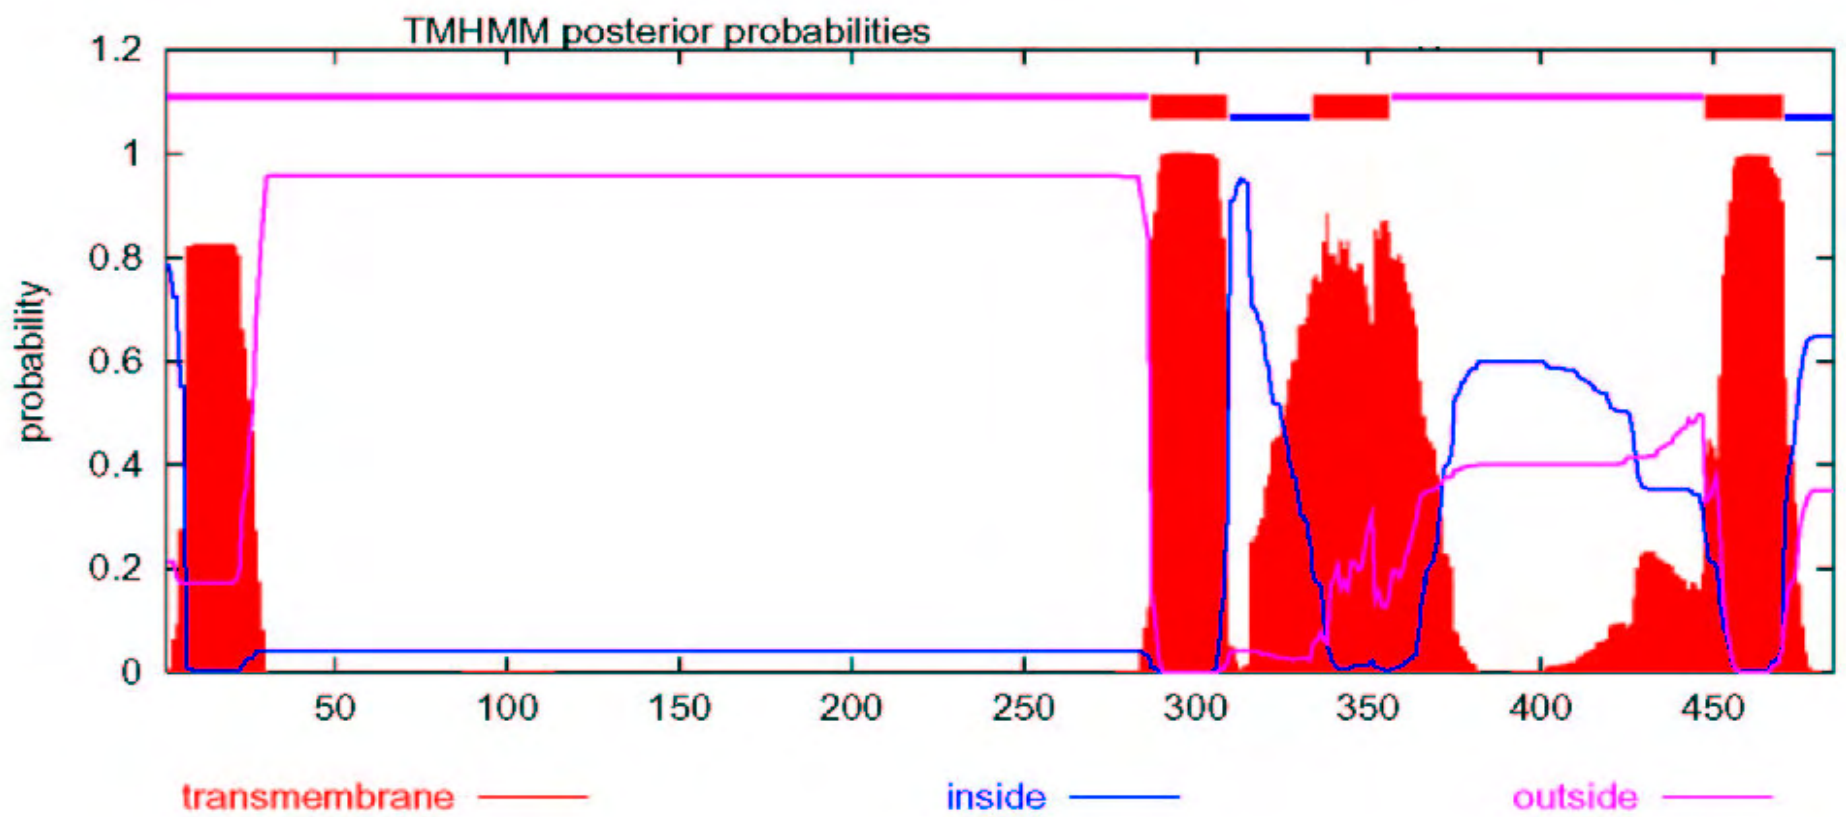

75

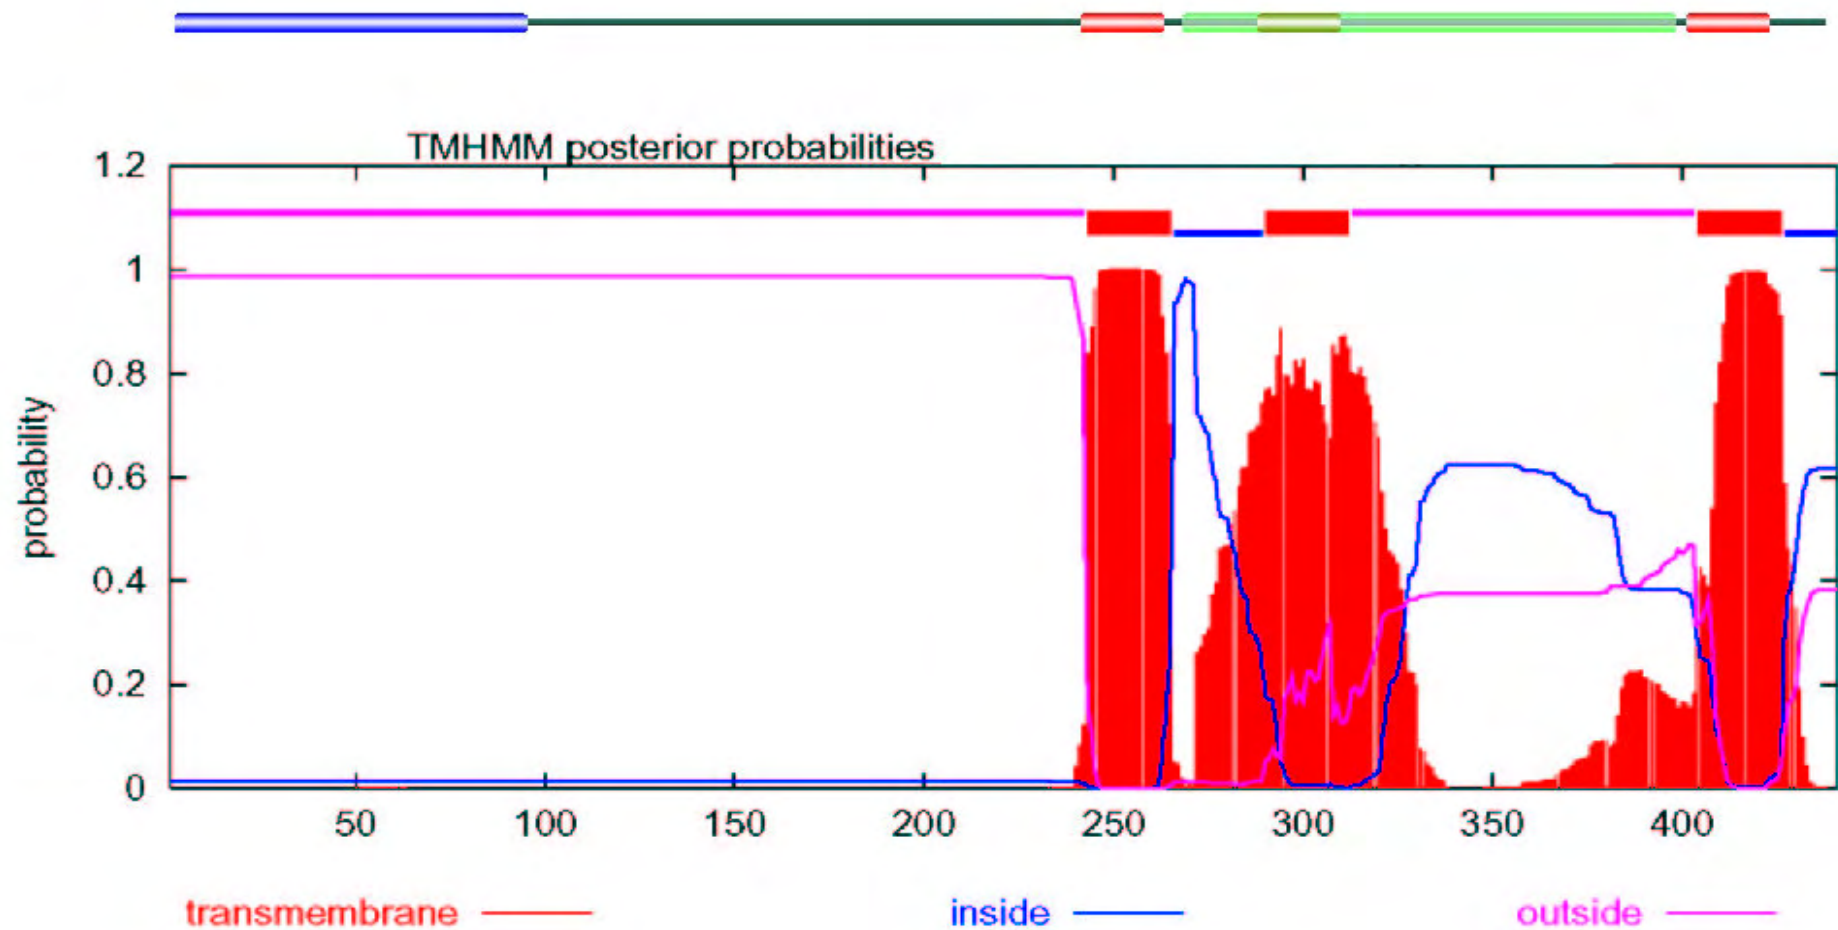

76

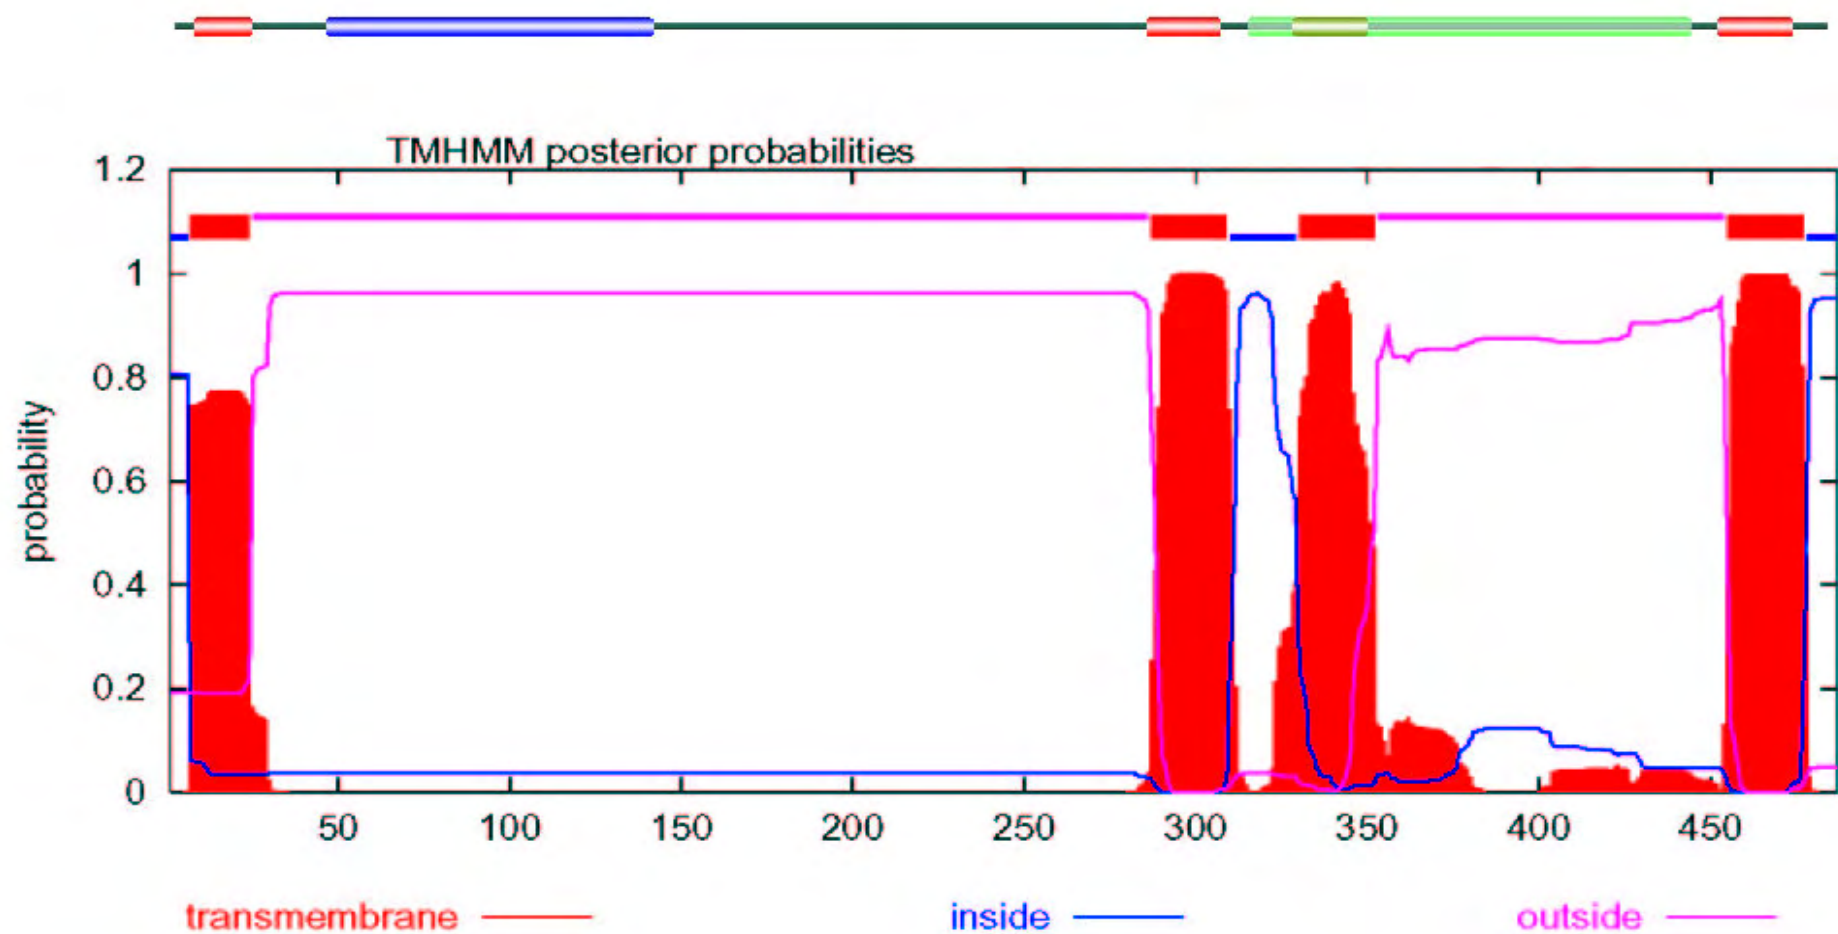

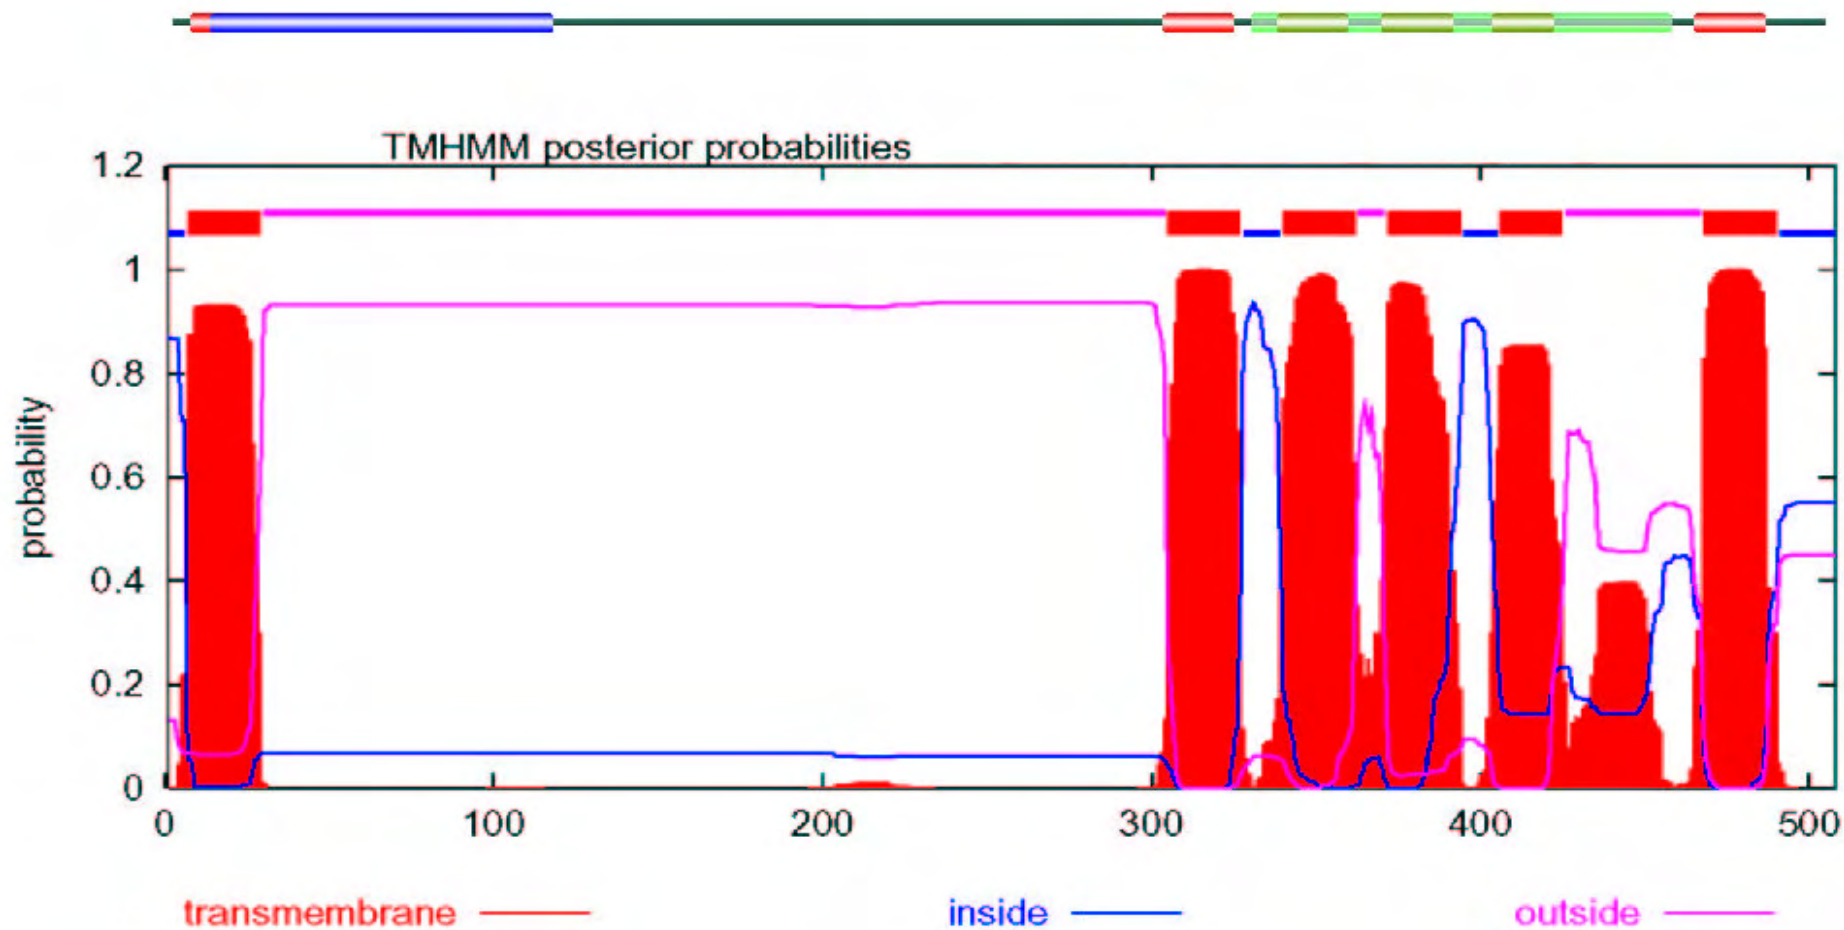

78



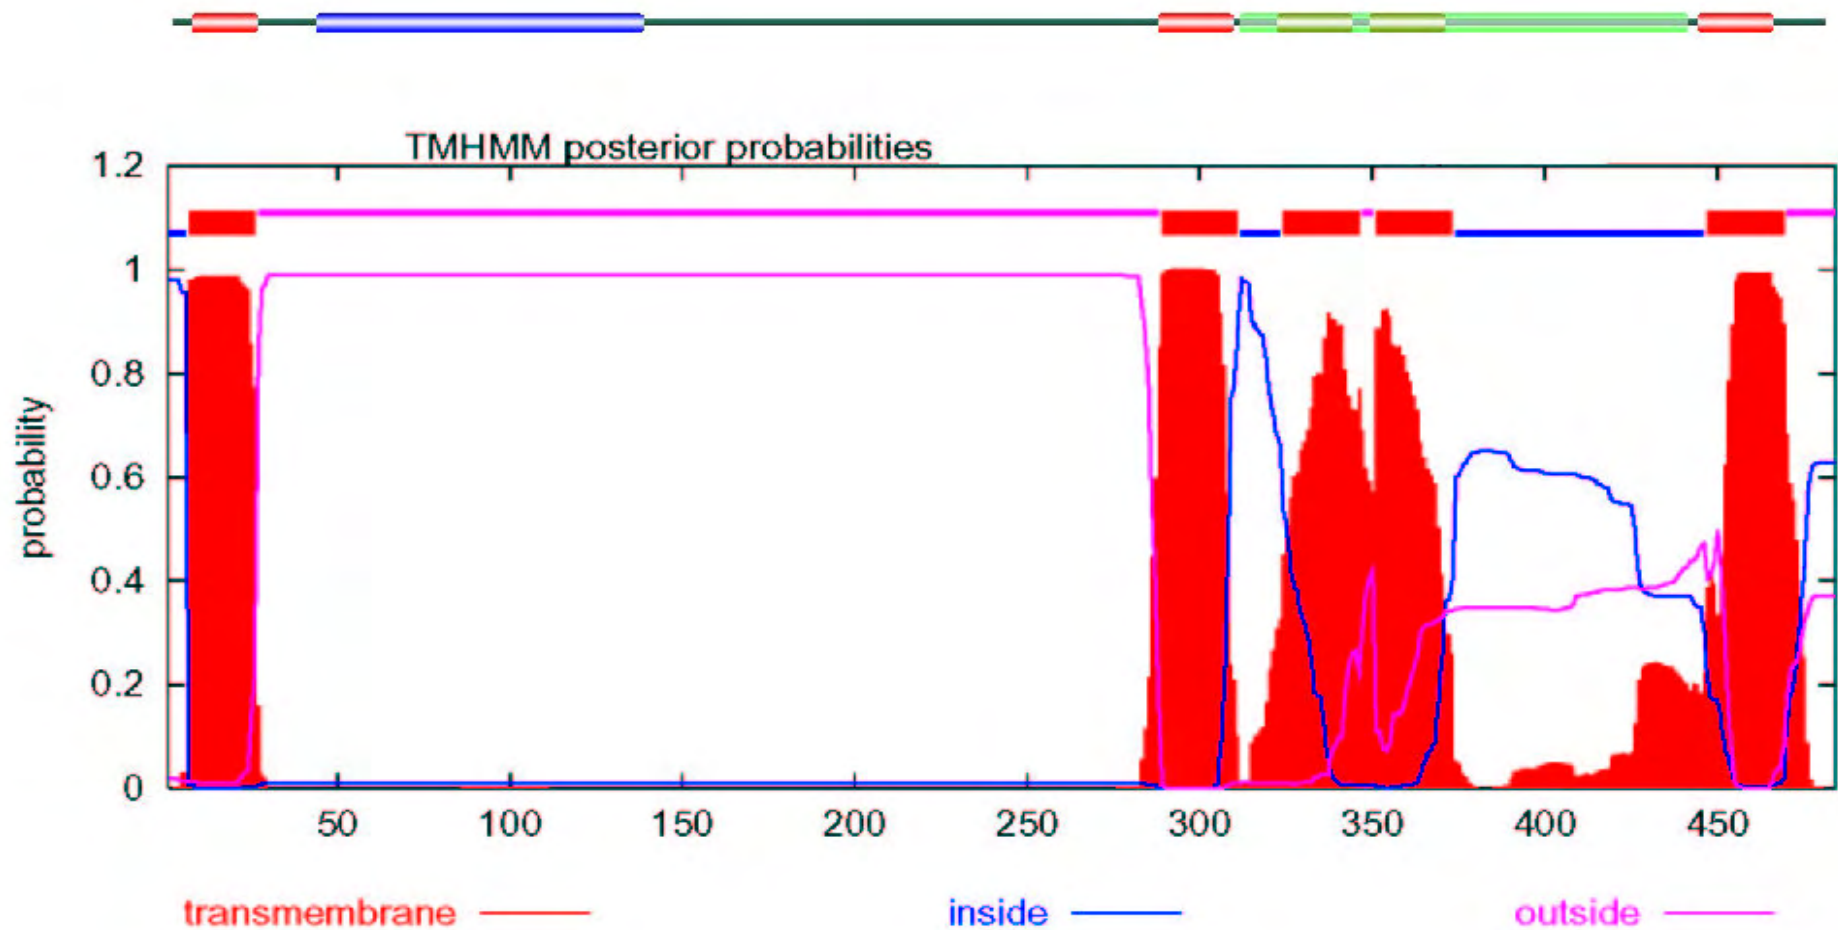

79

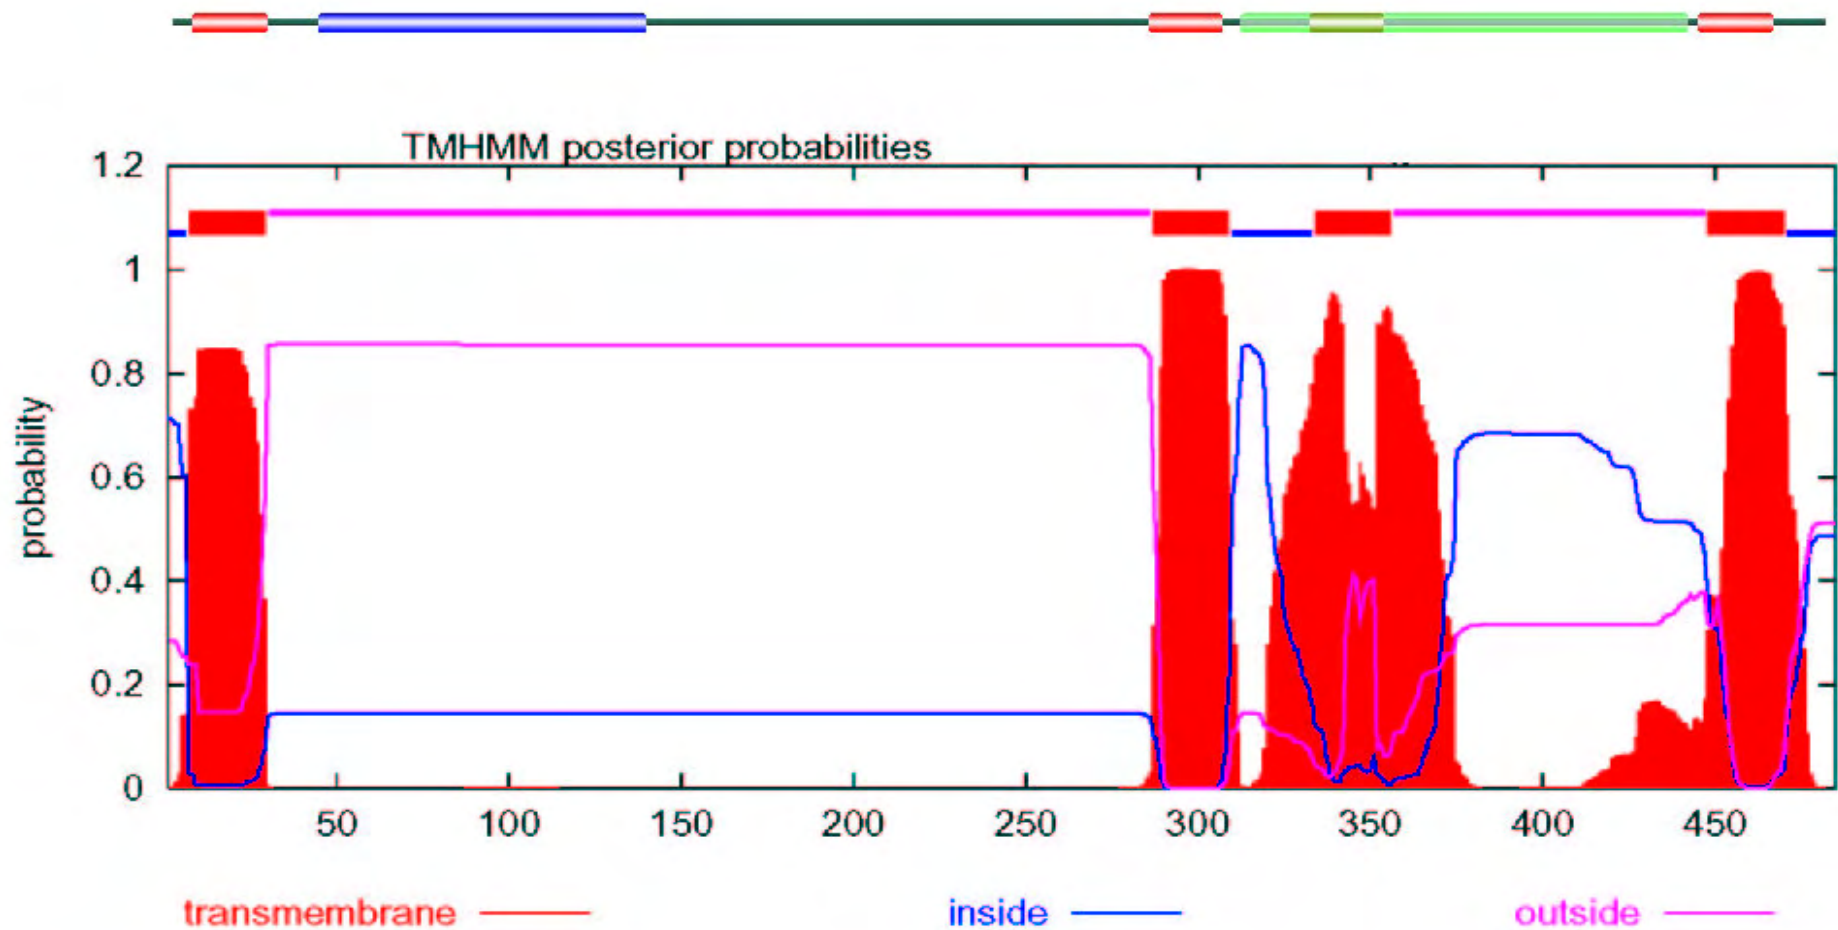

80

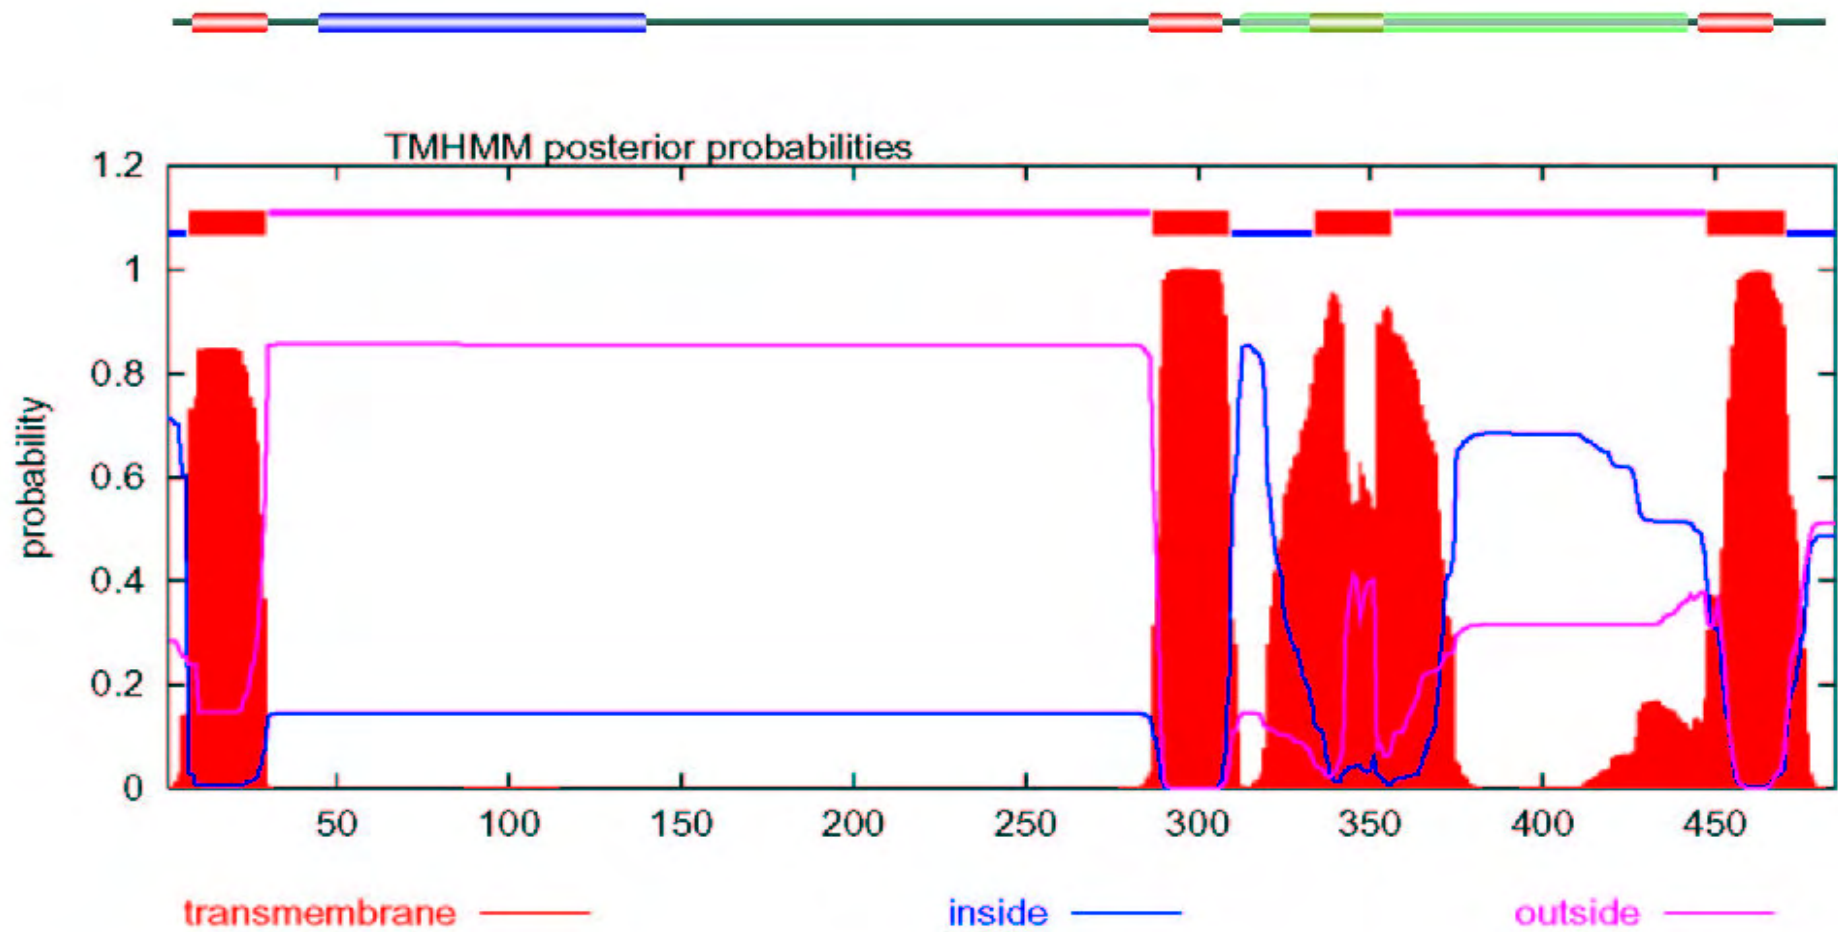

81

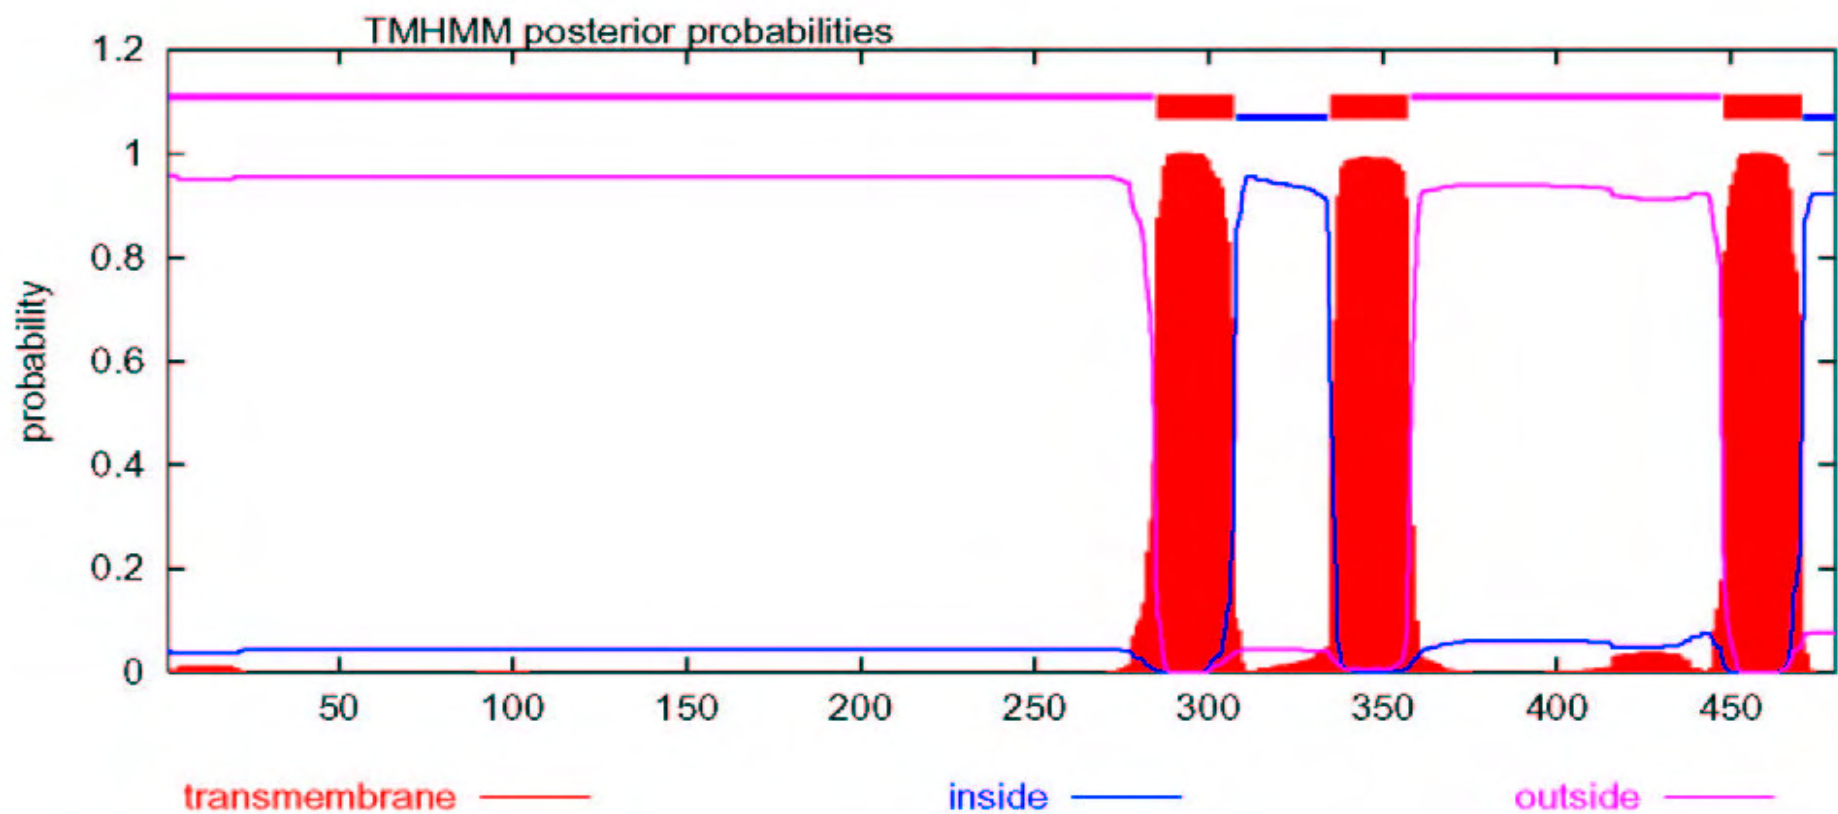

82

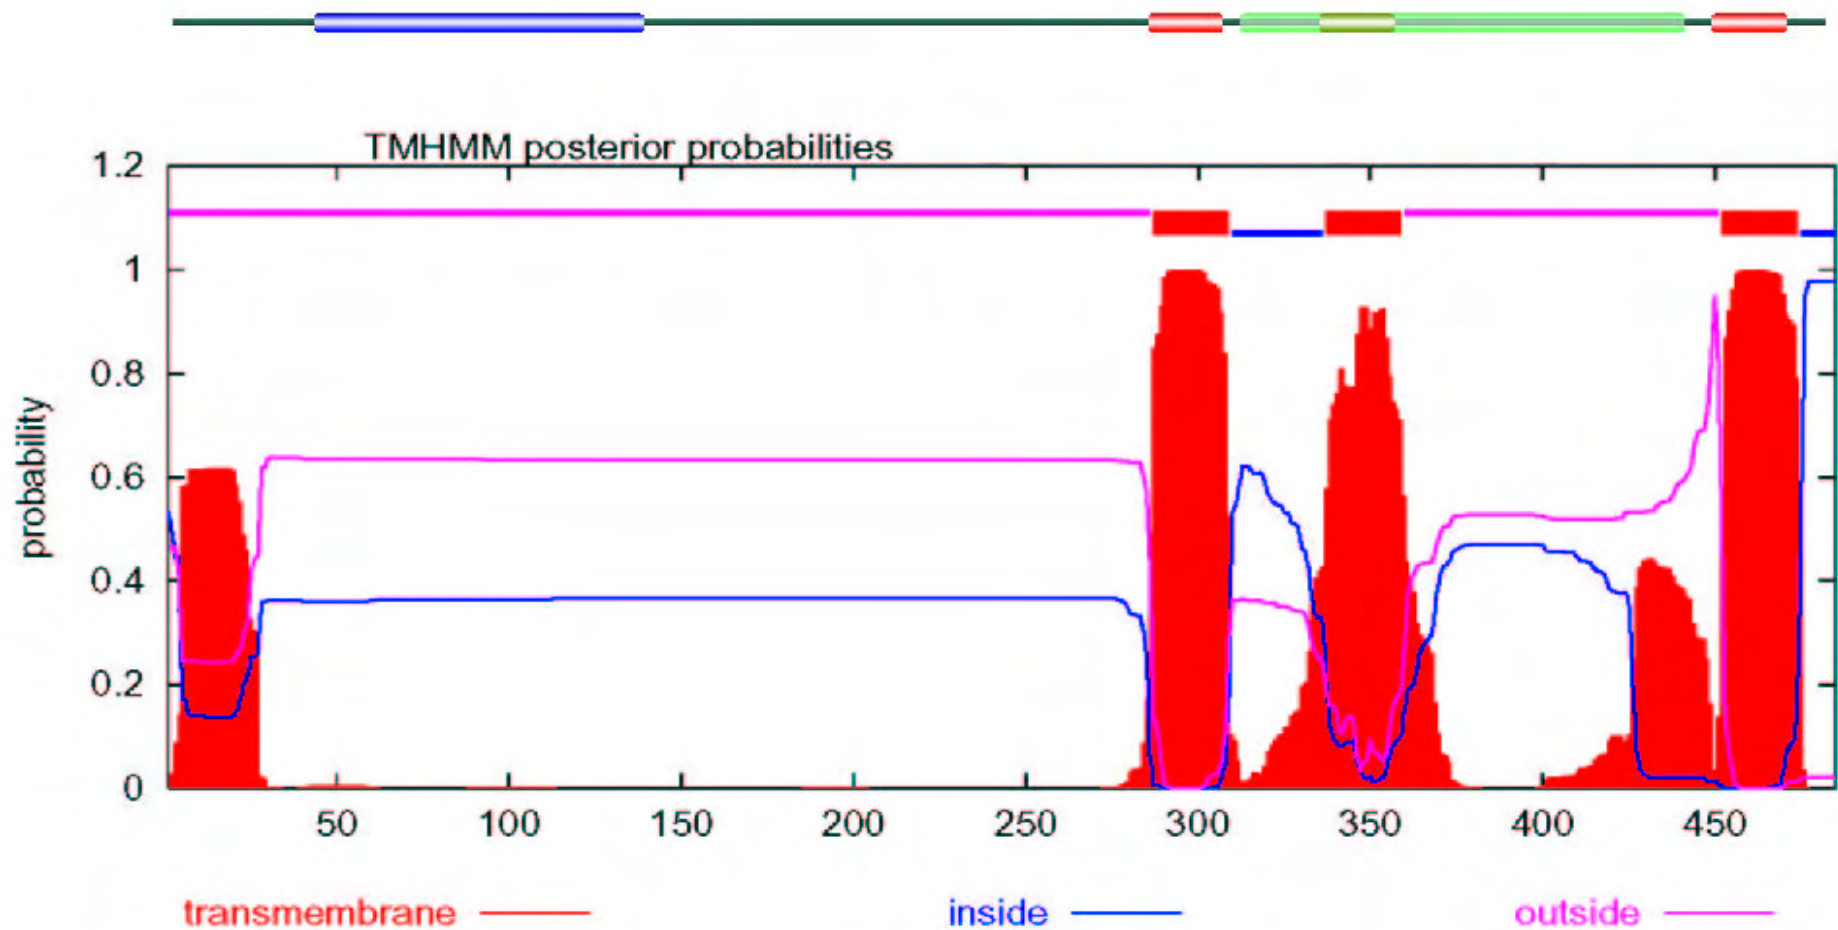

83

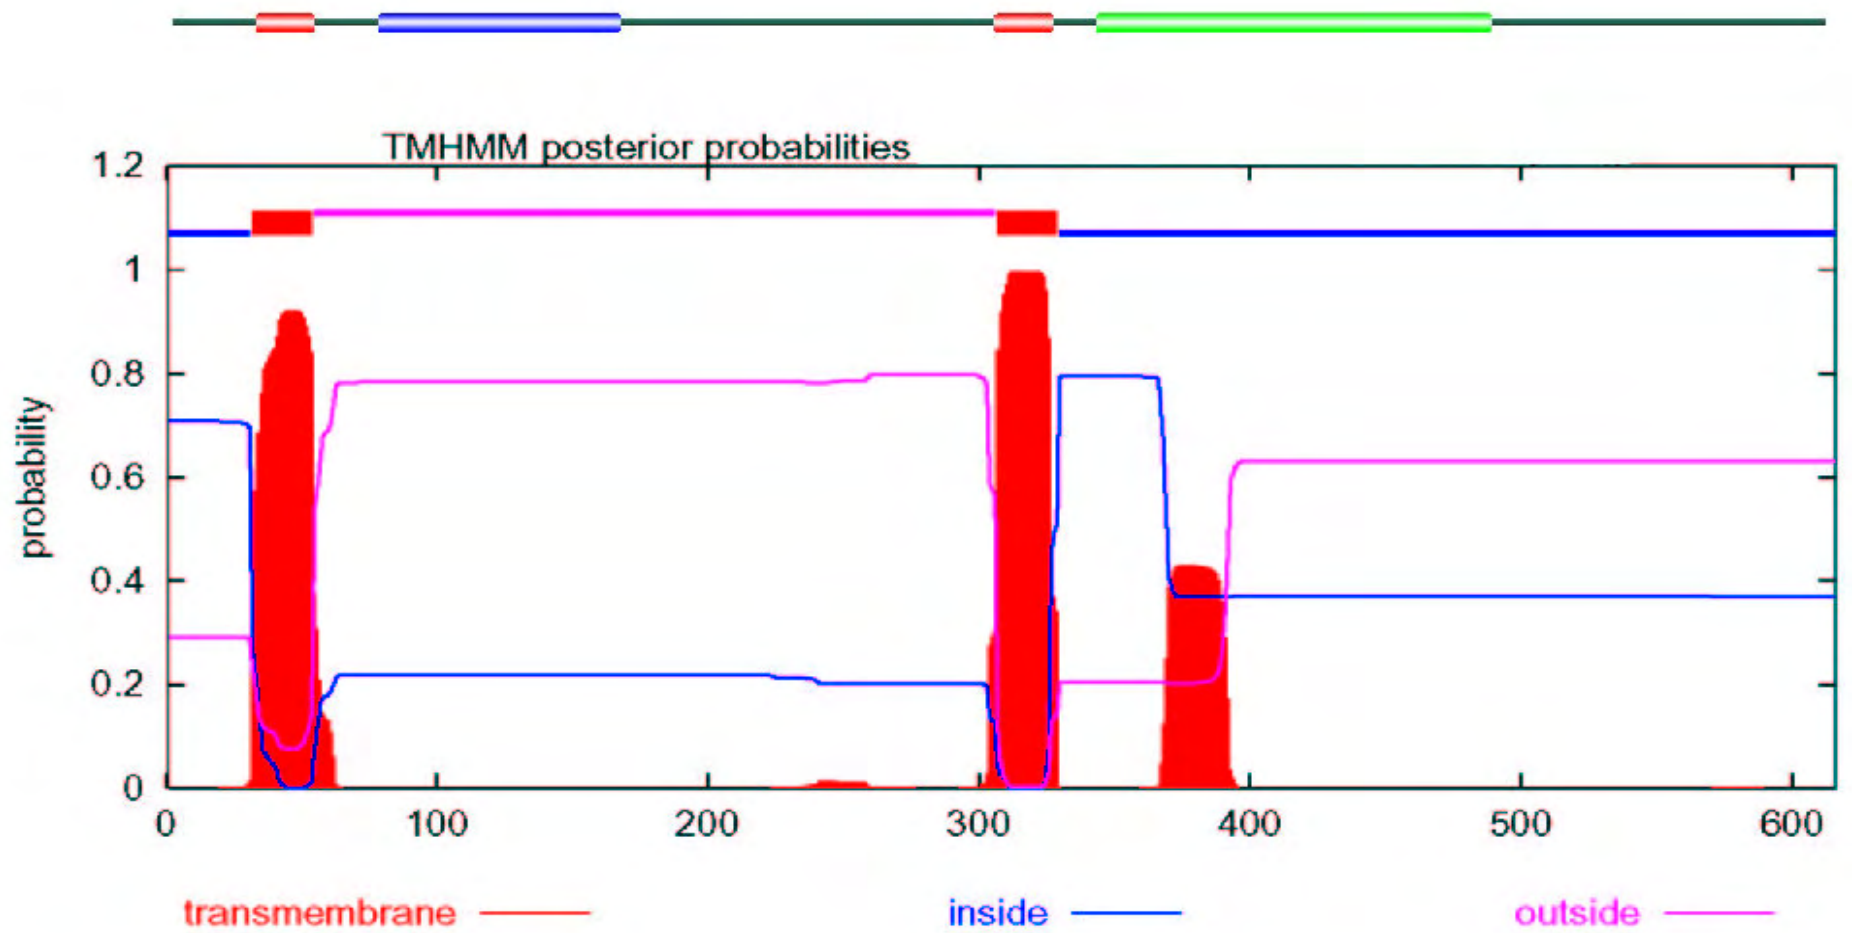

84



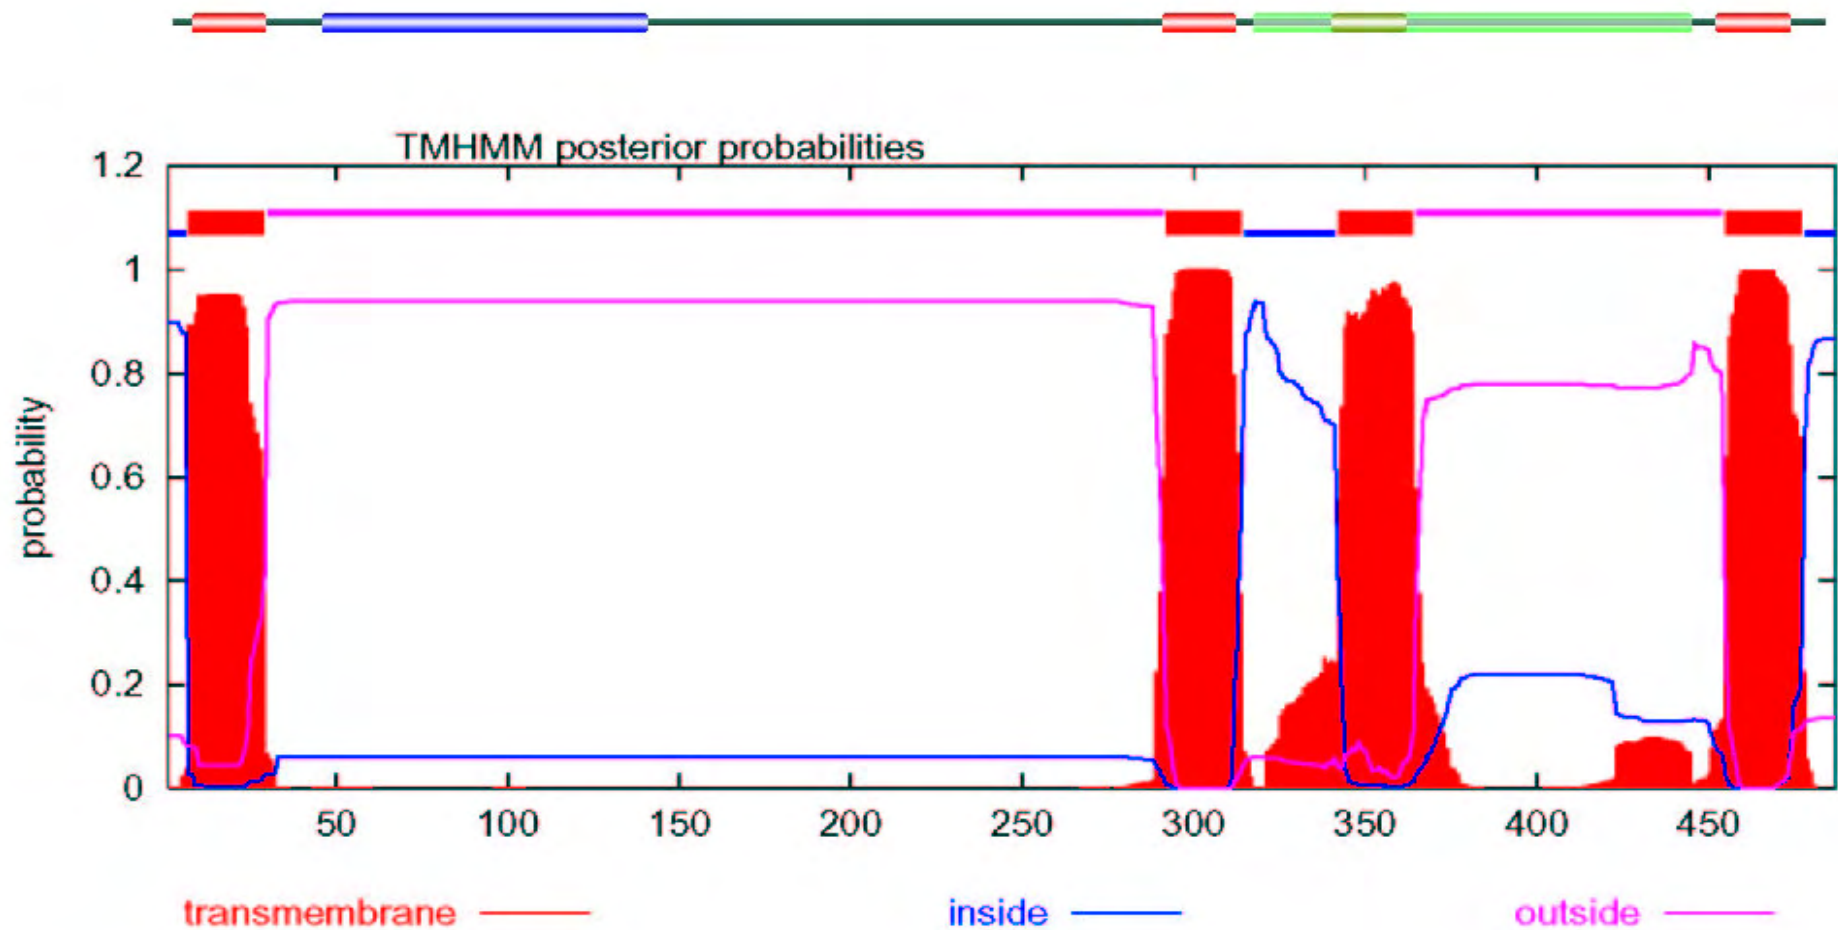

85

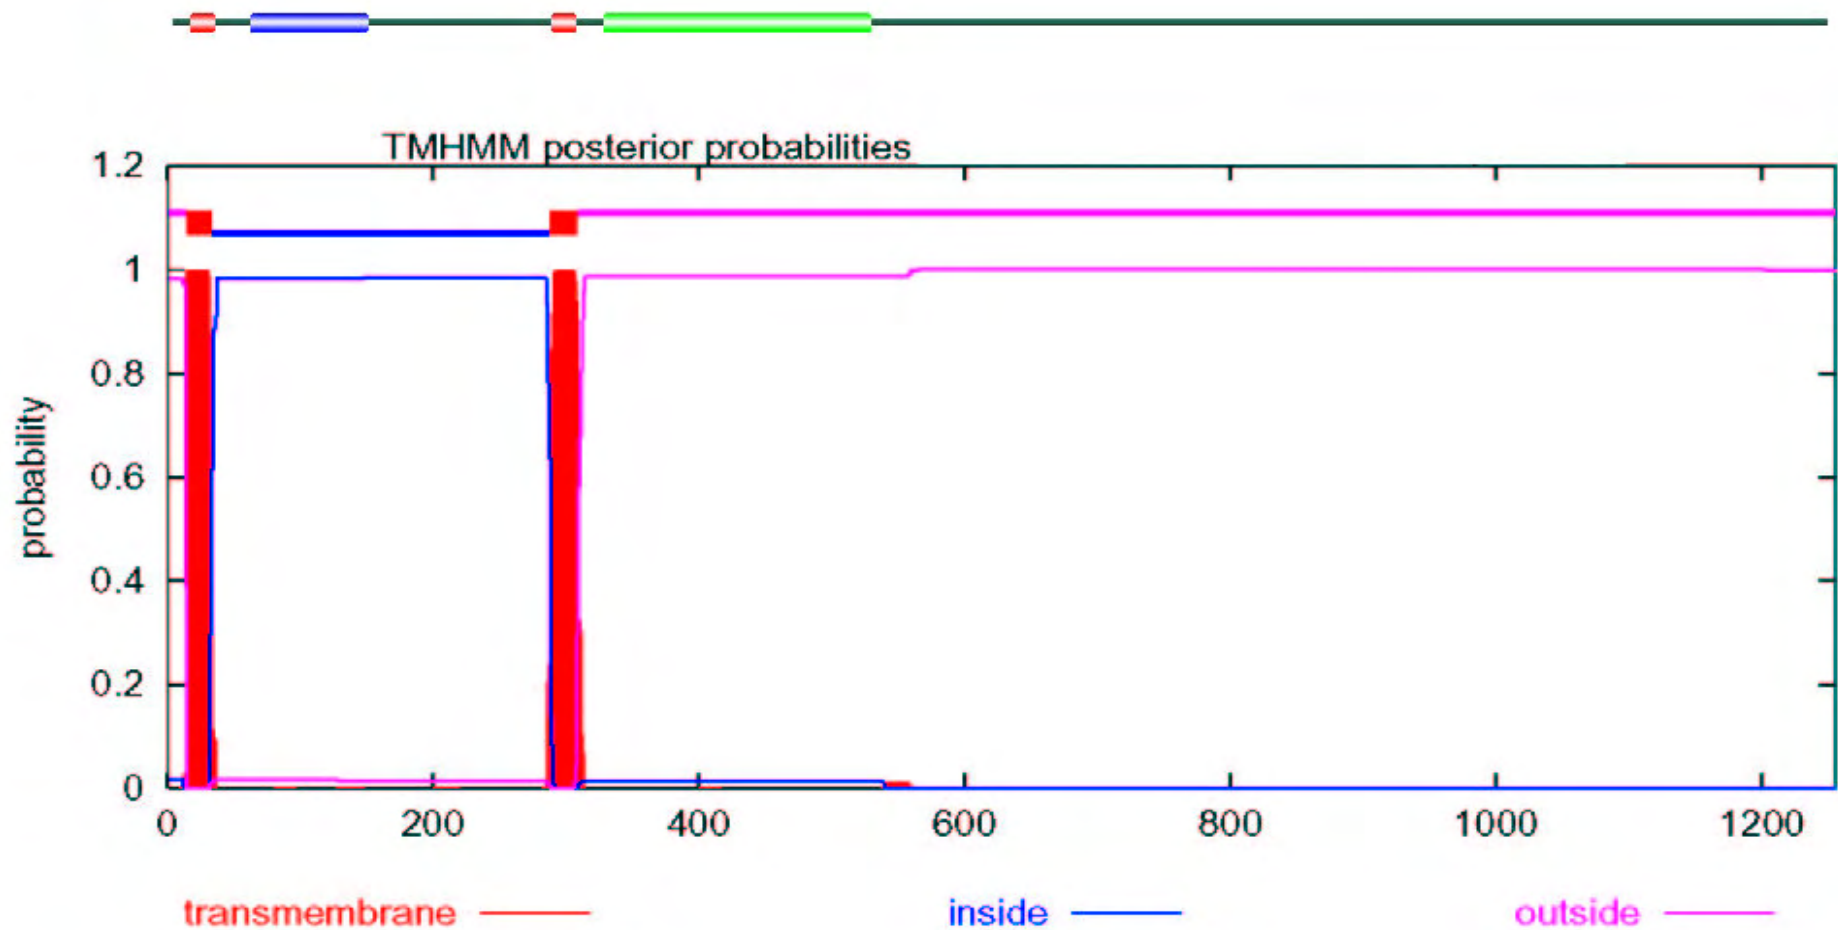

86

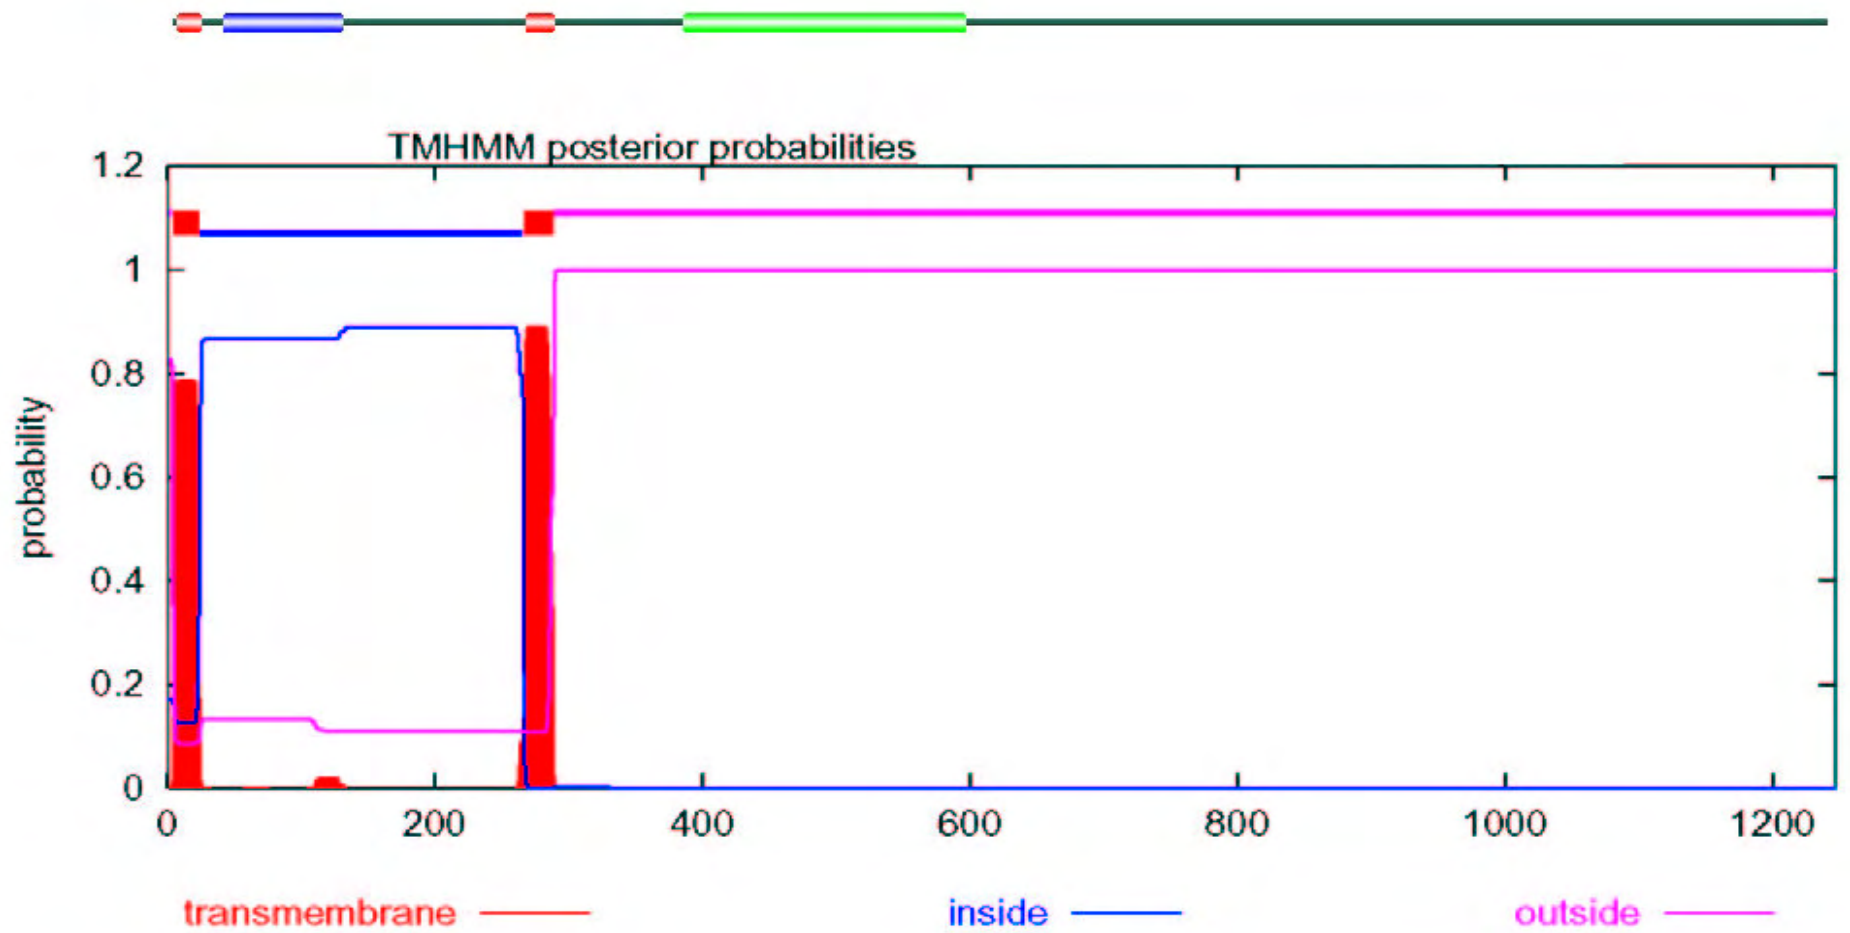

87

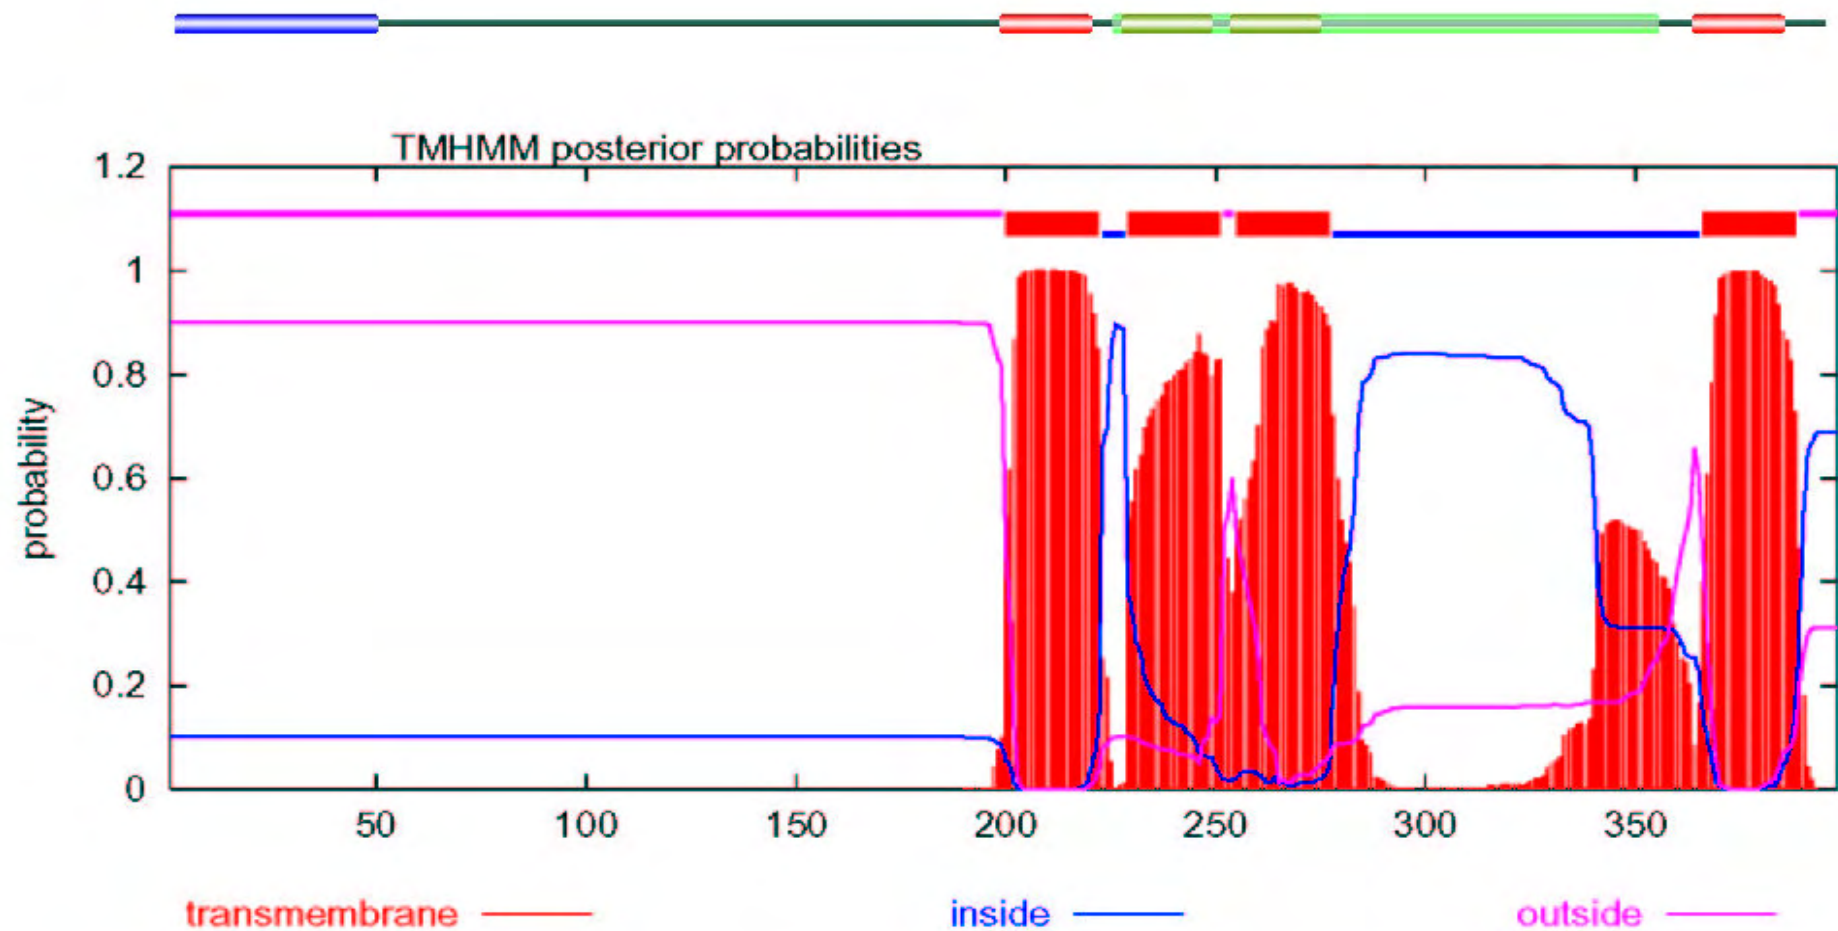

88

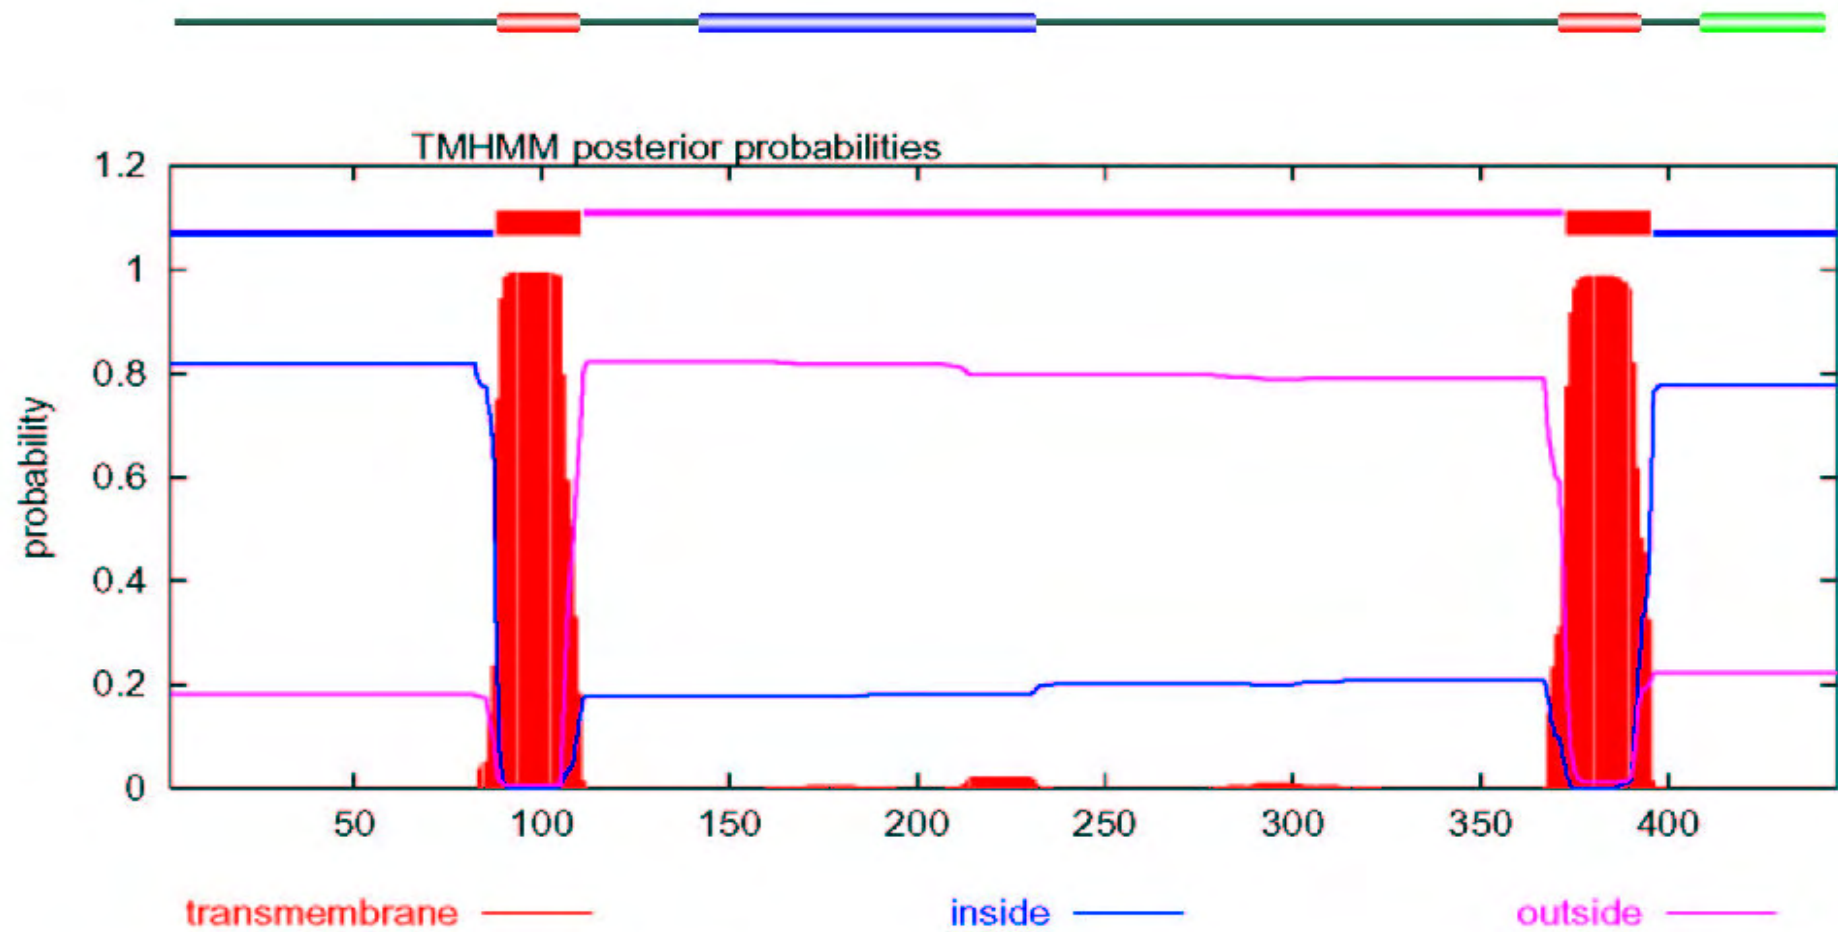

89

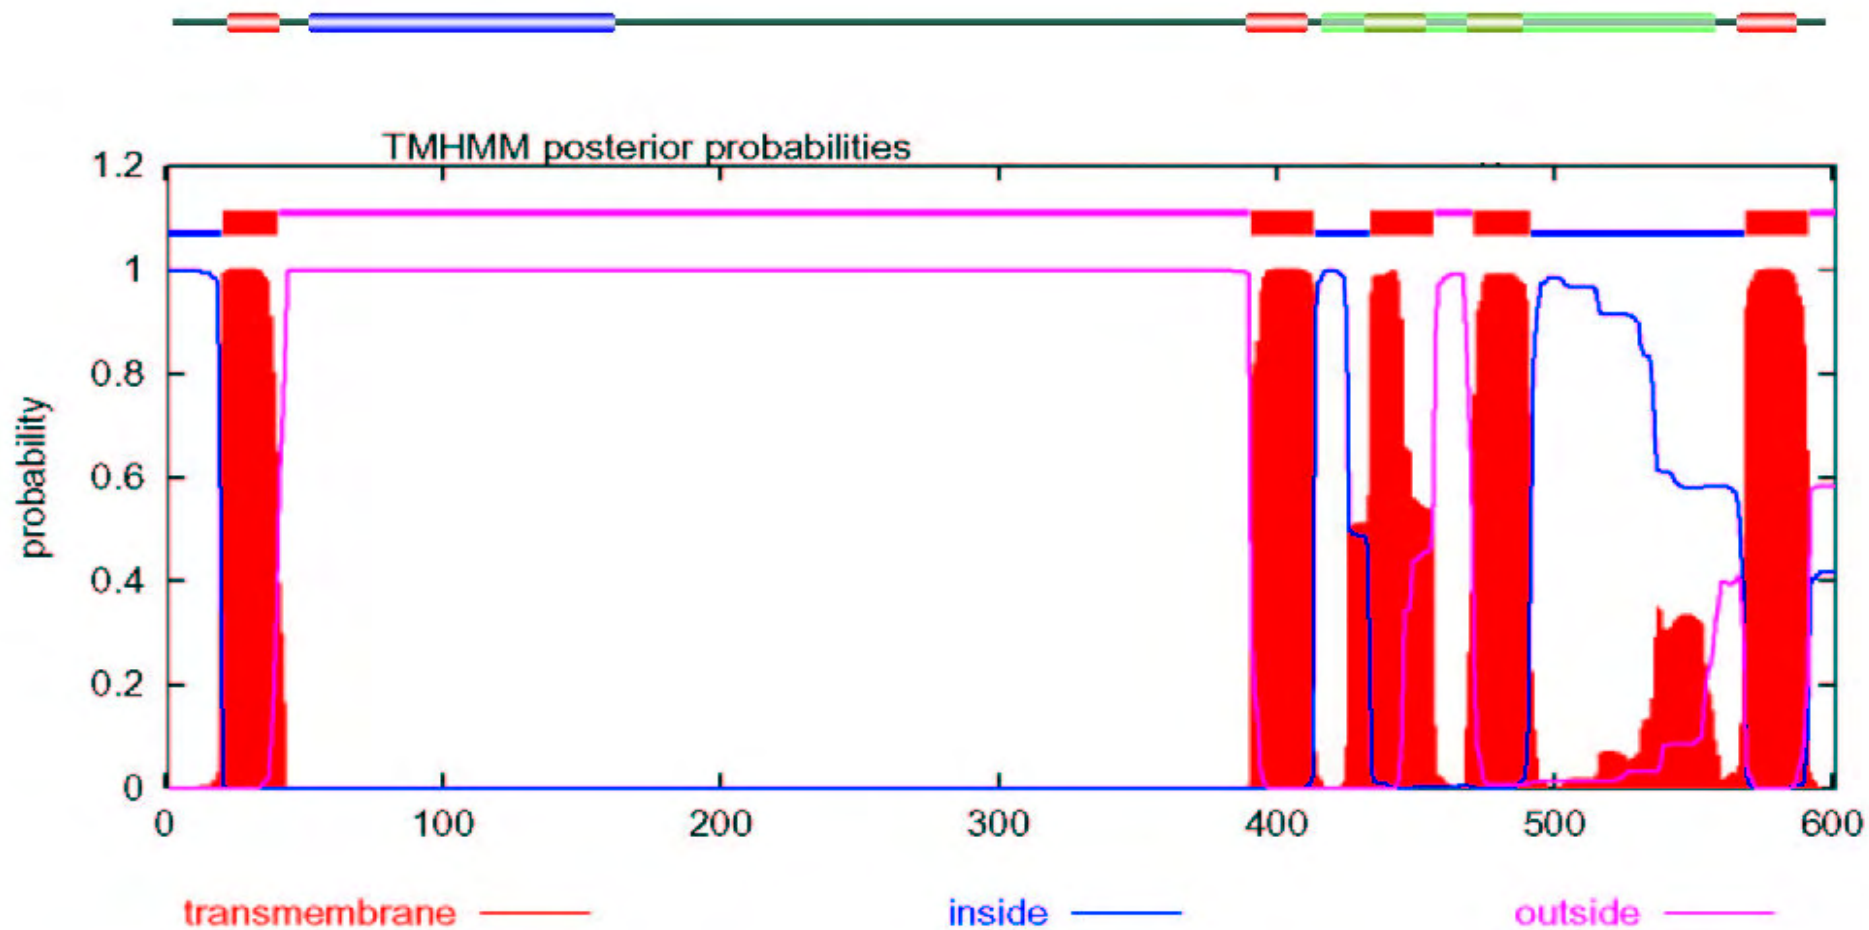

90



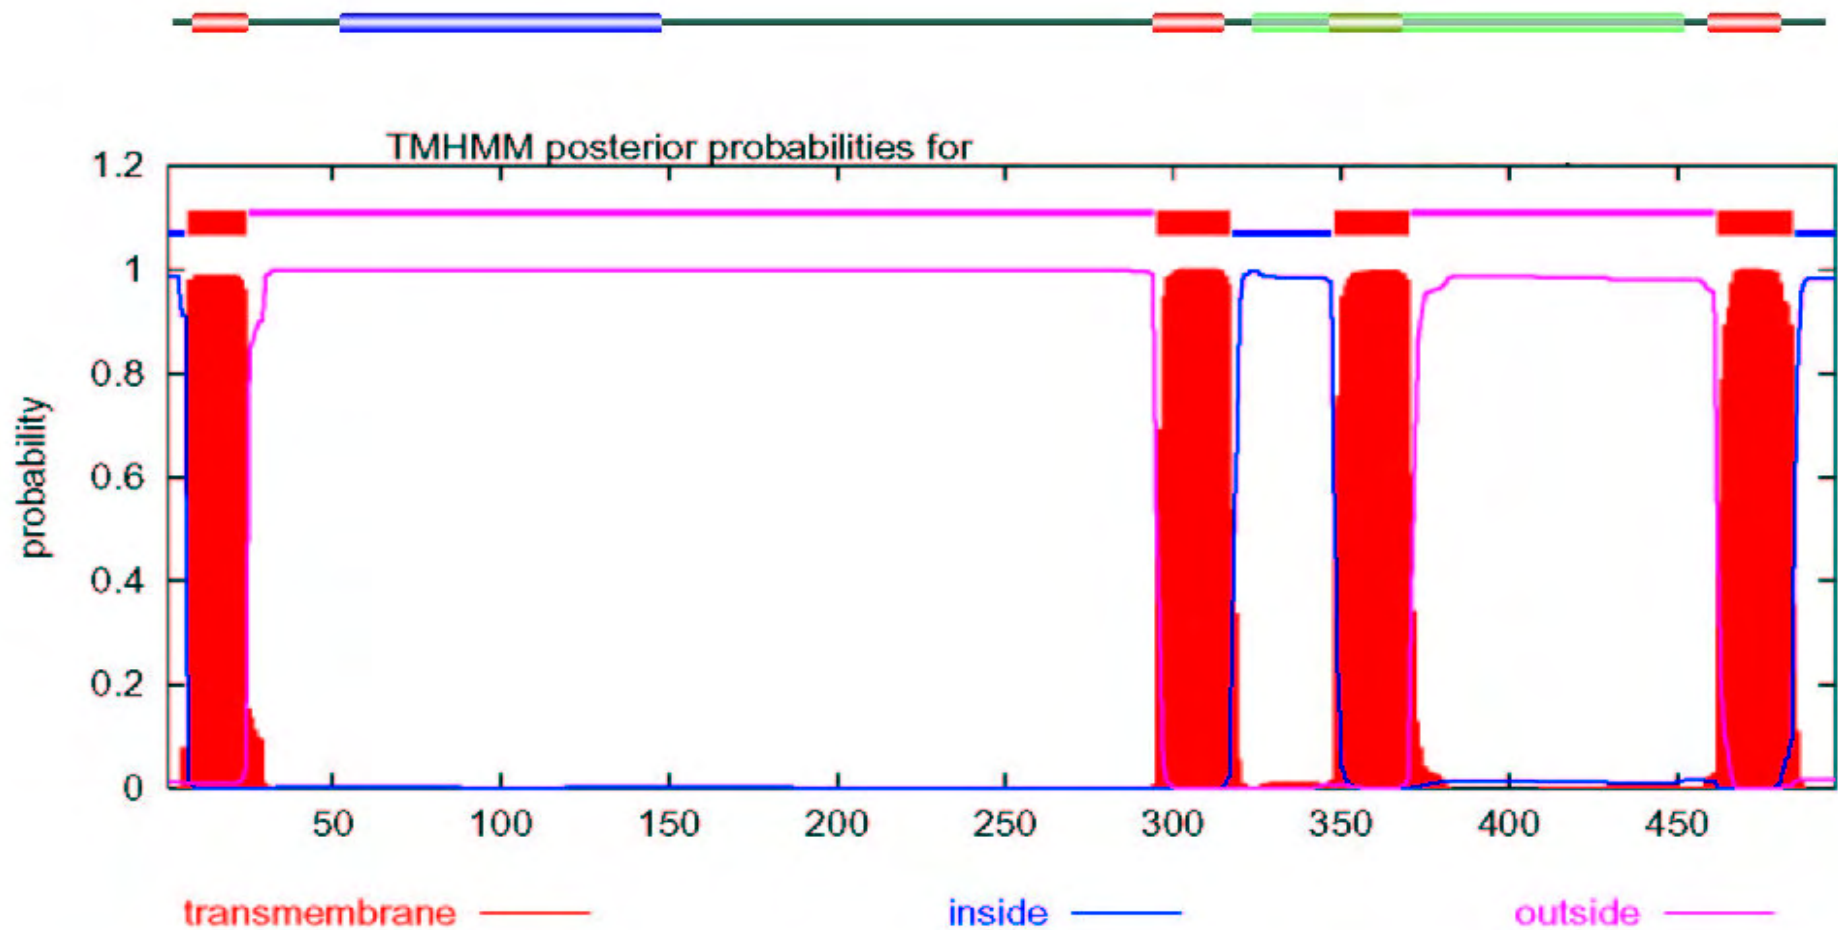

91

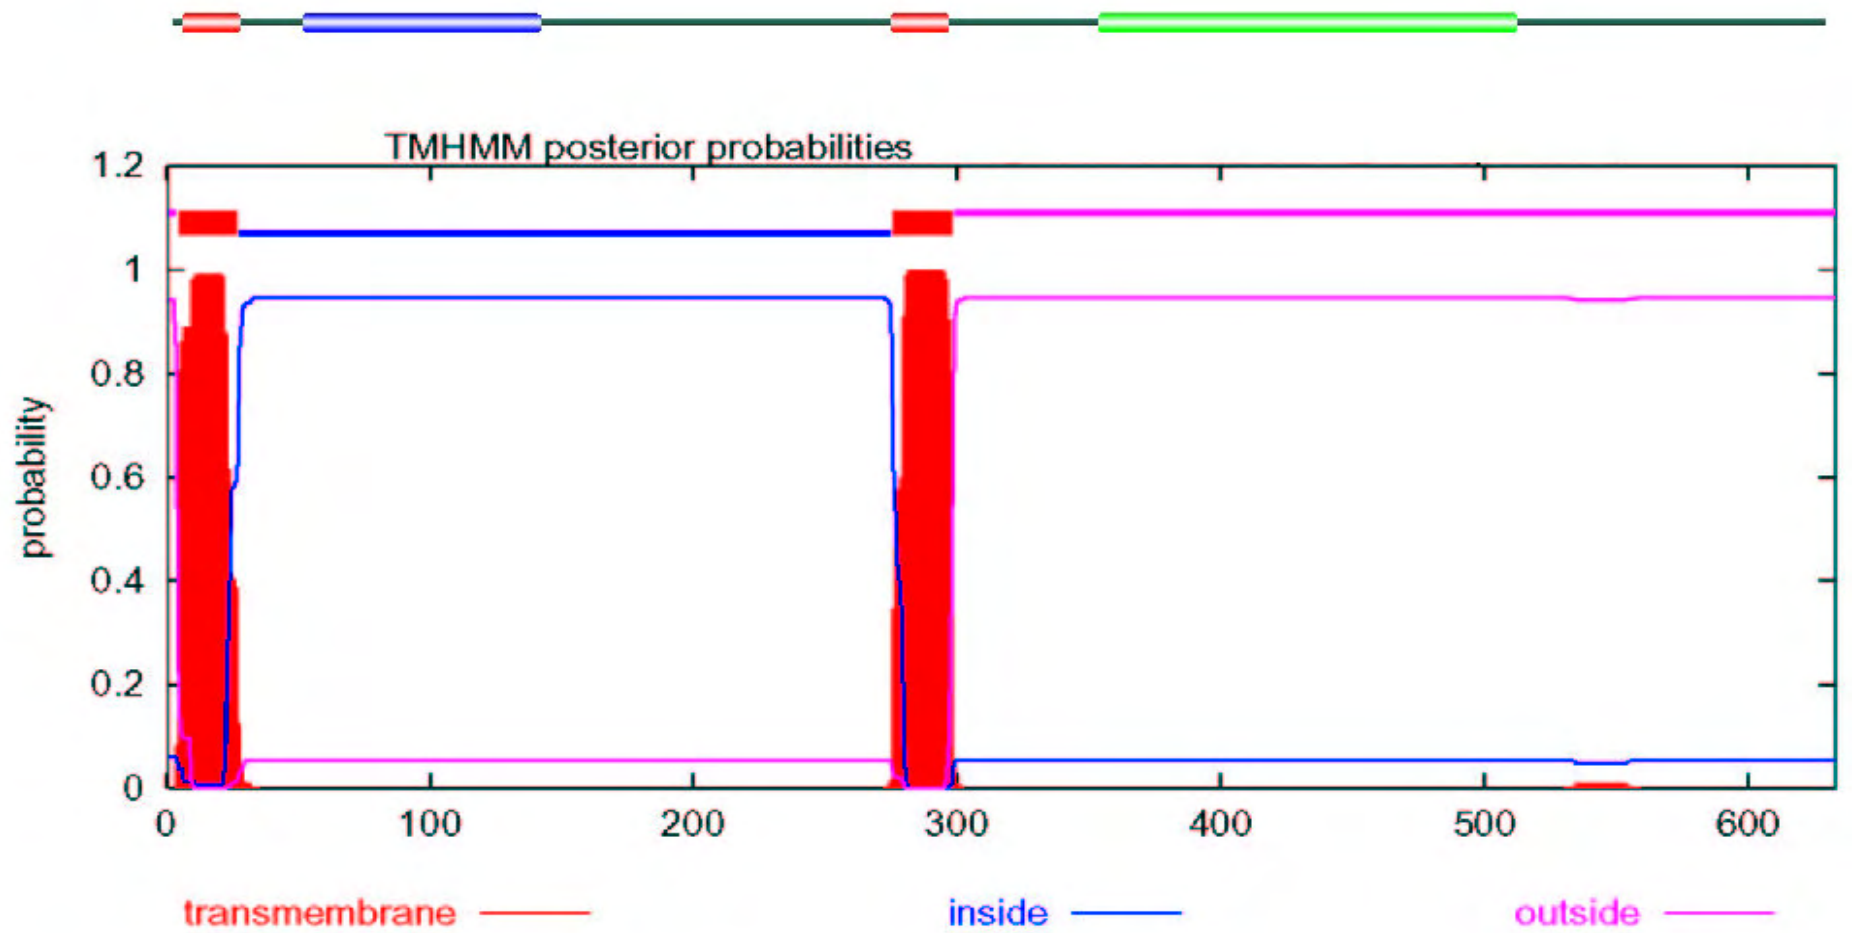

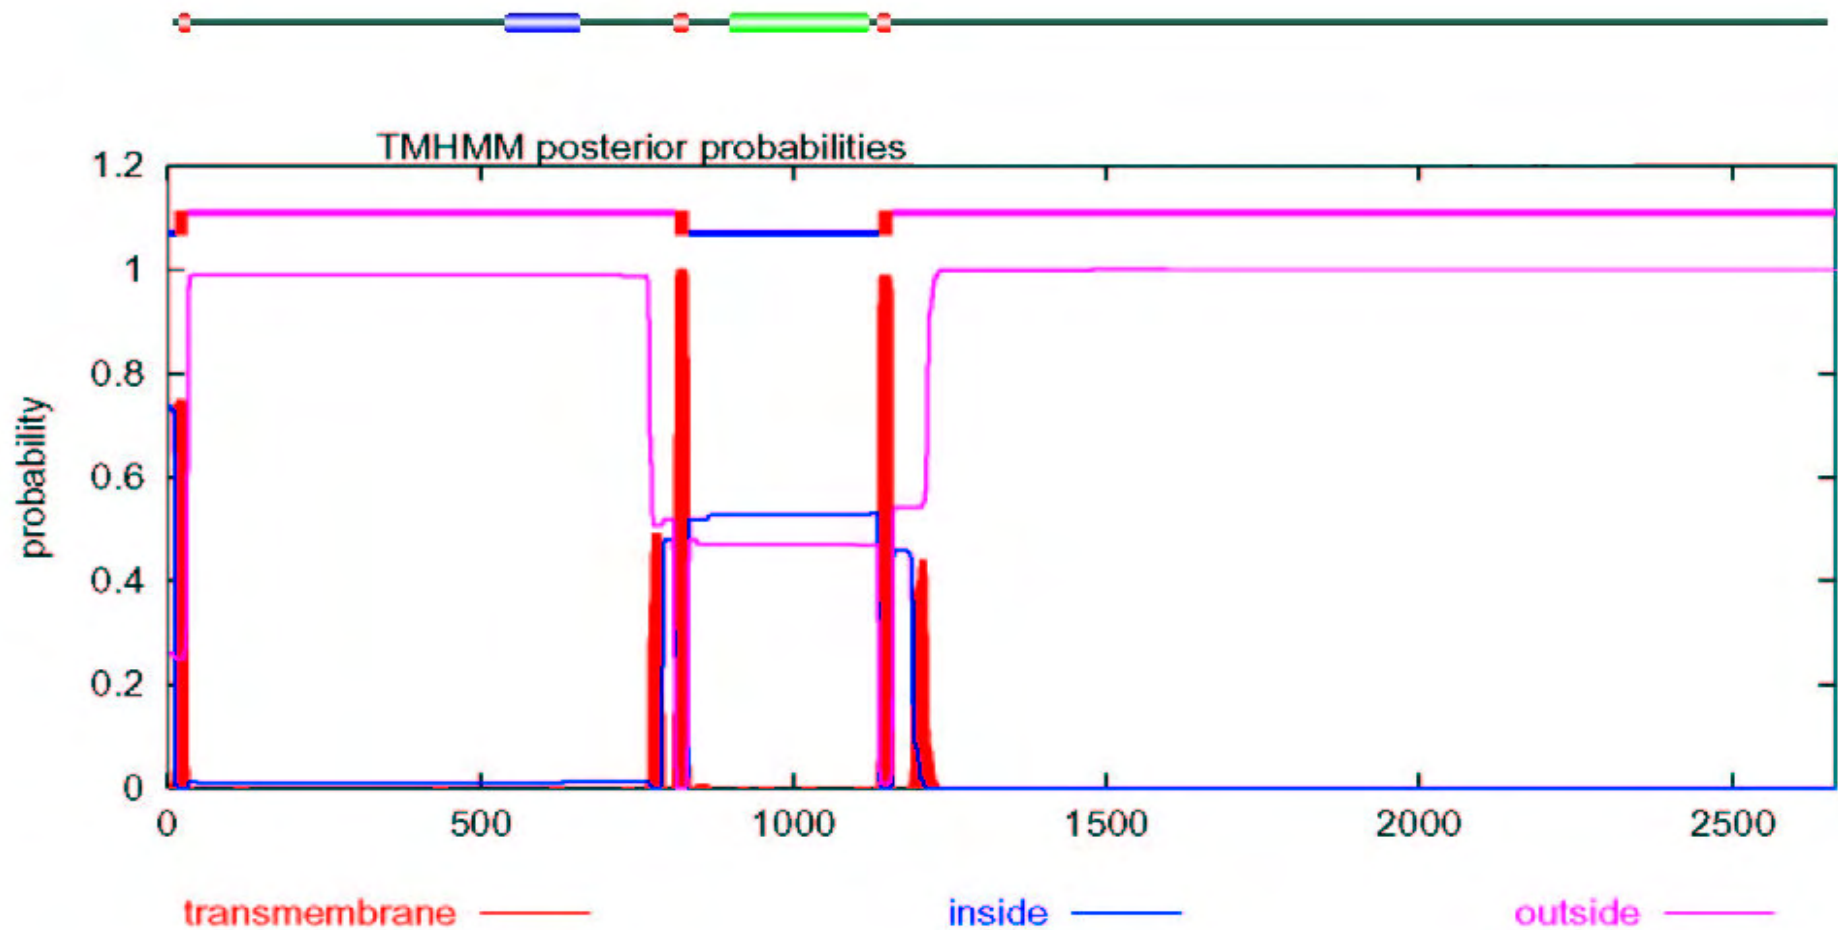

93

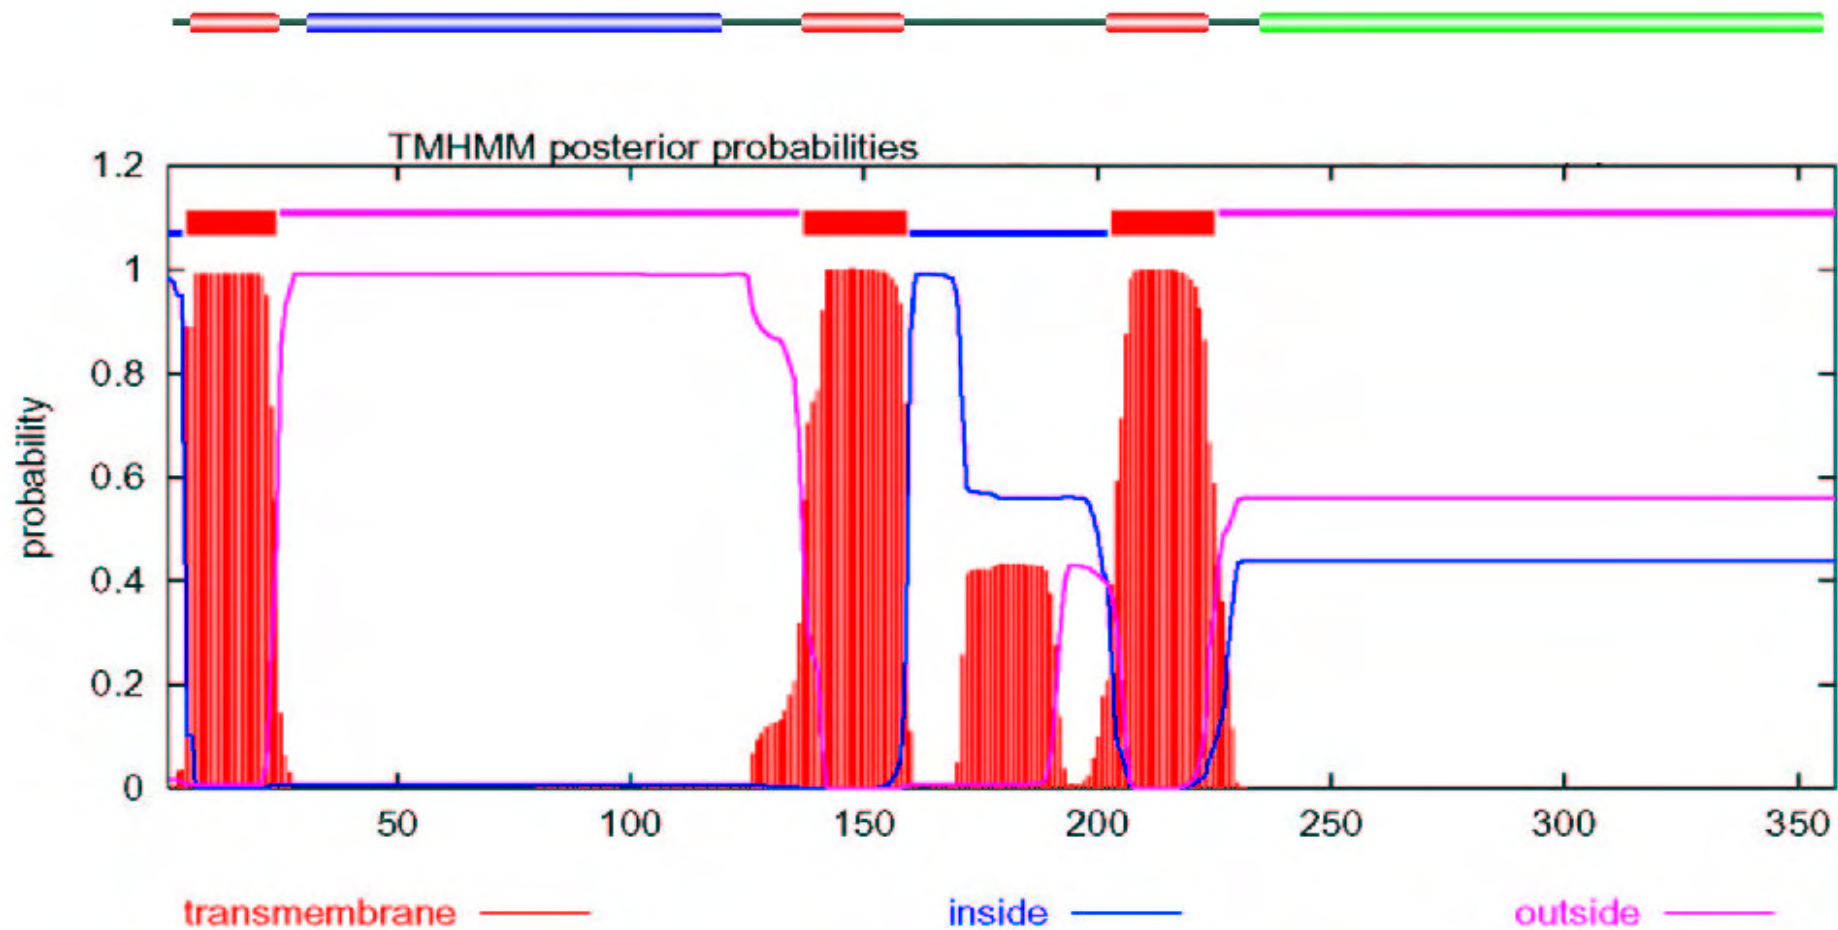

94

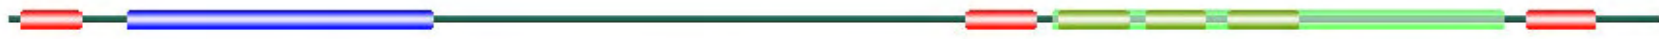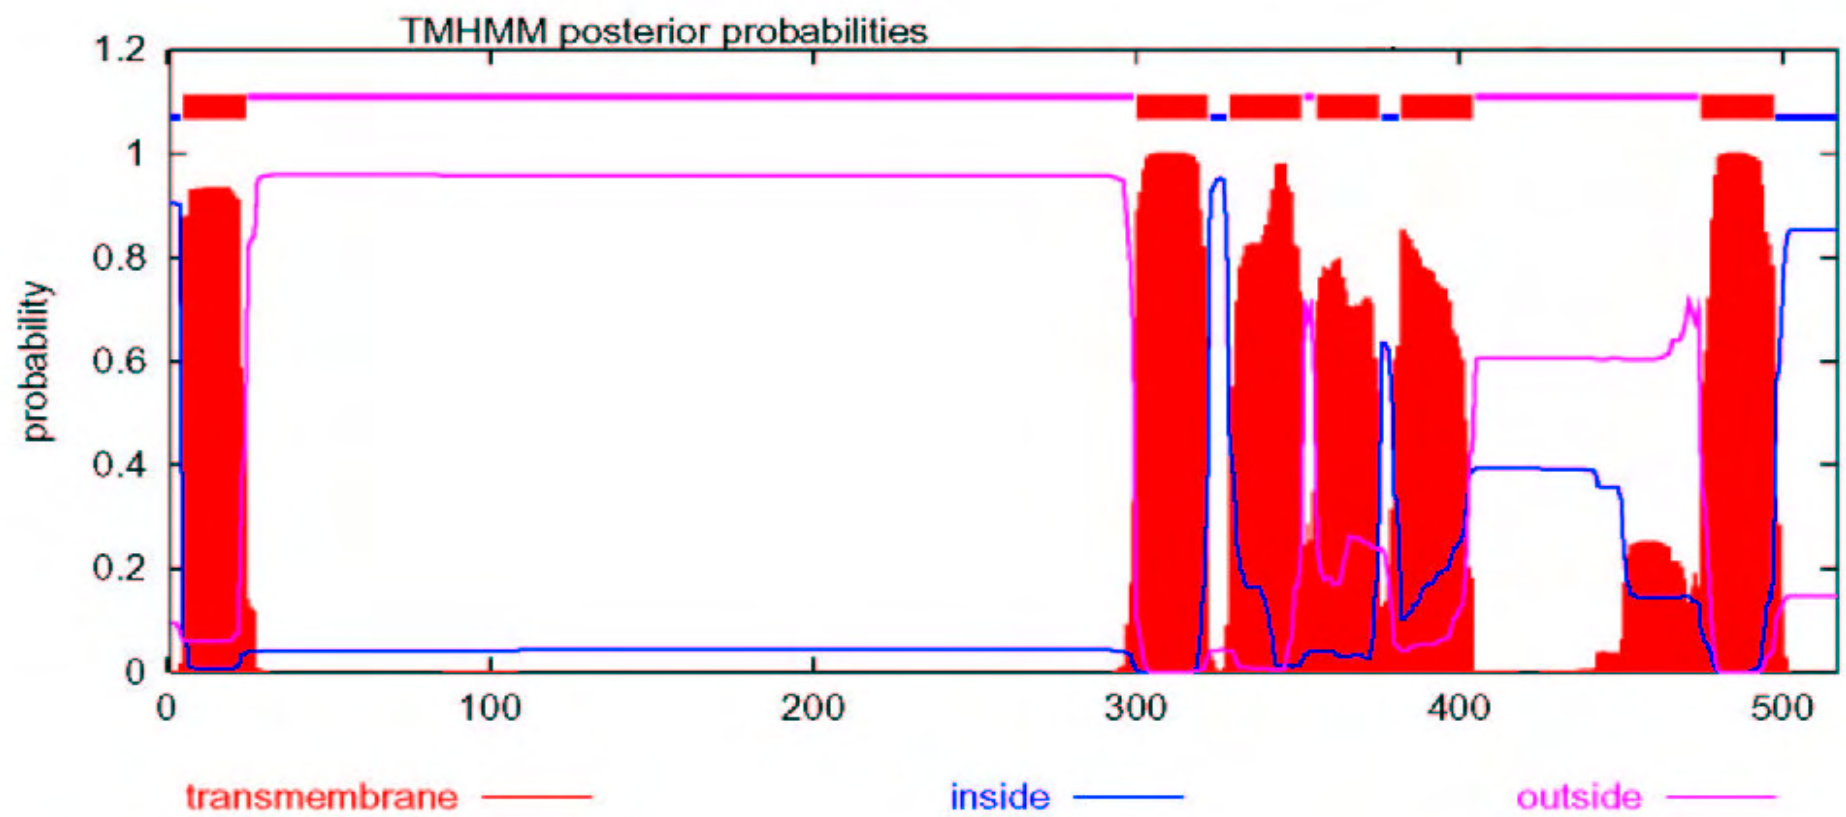

95

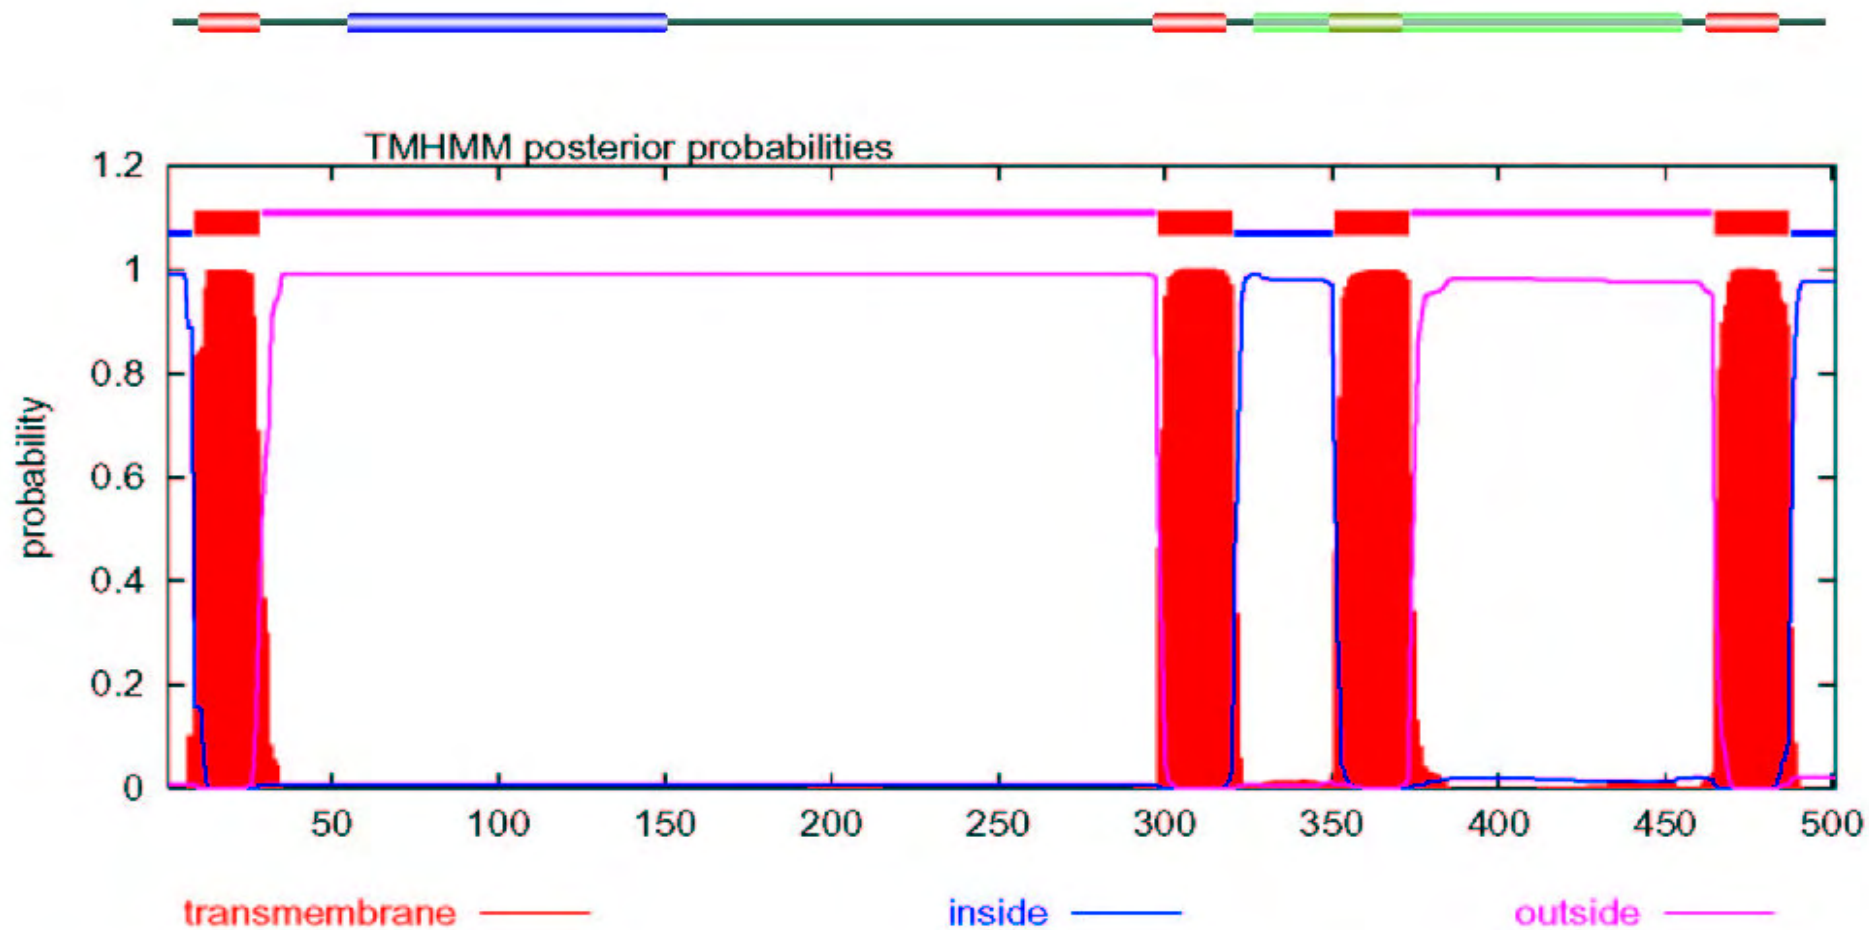

96



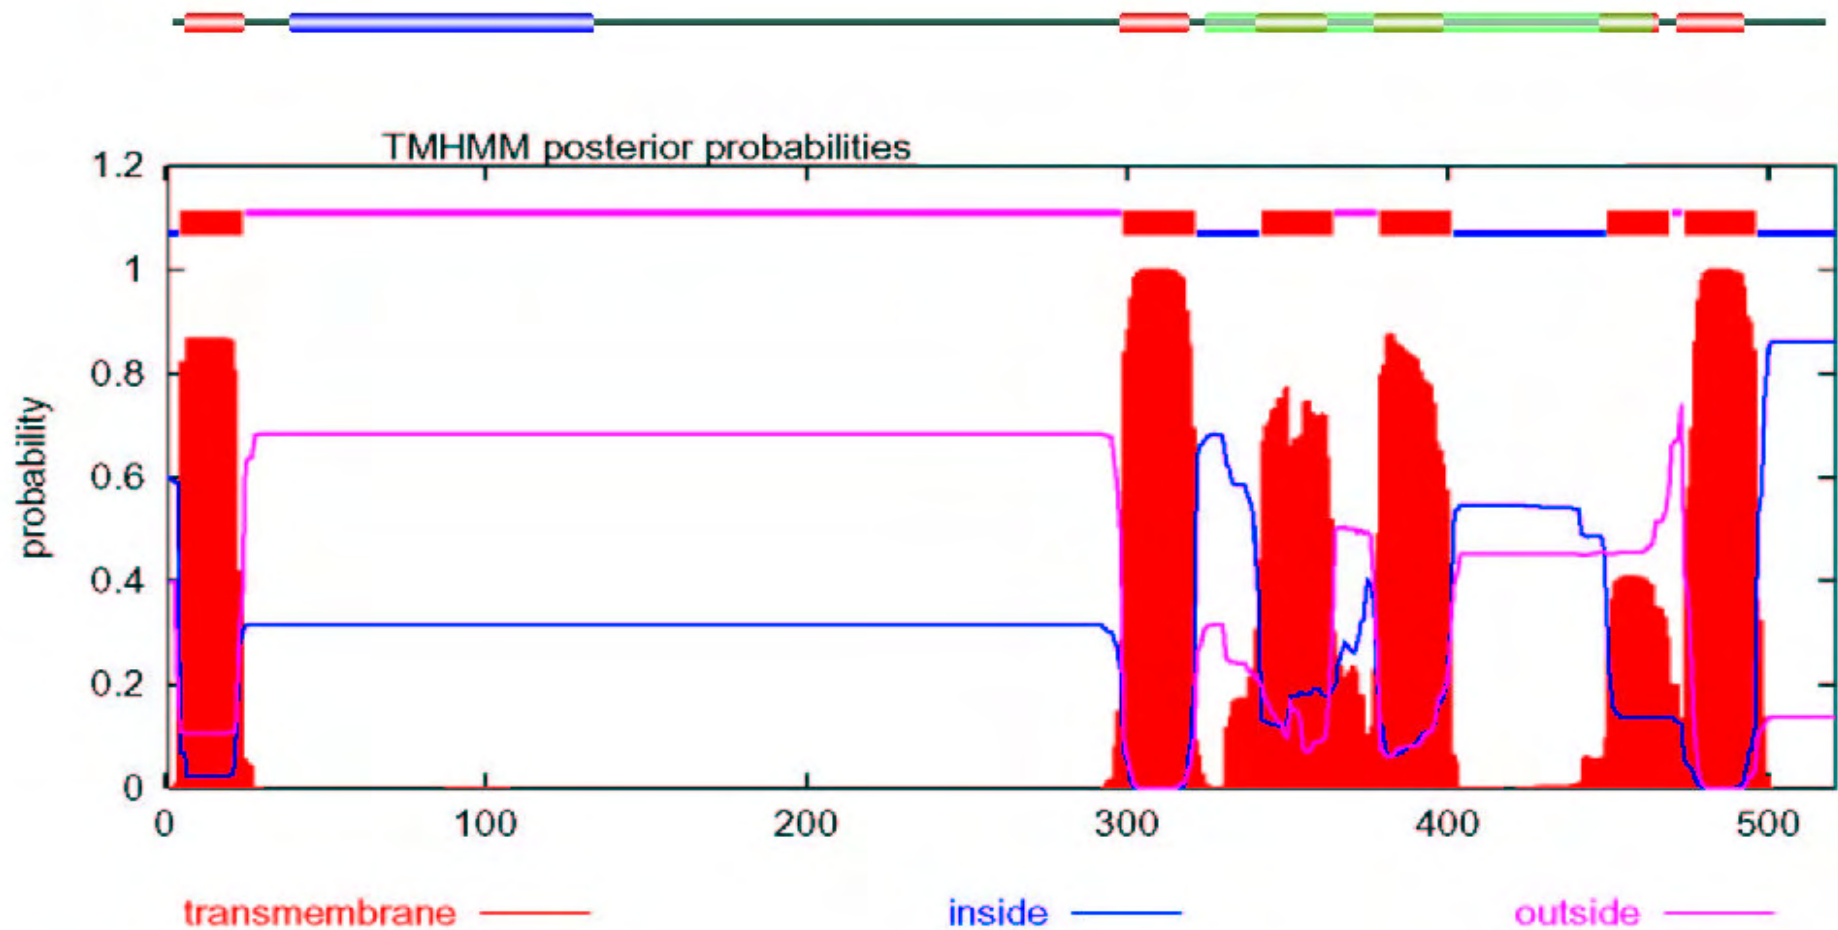

97

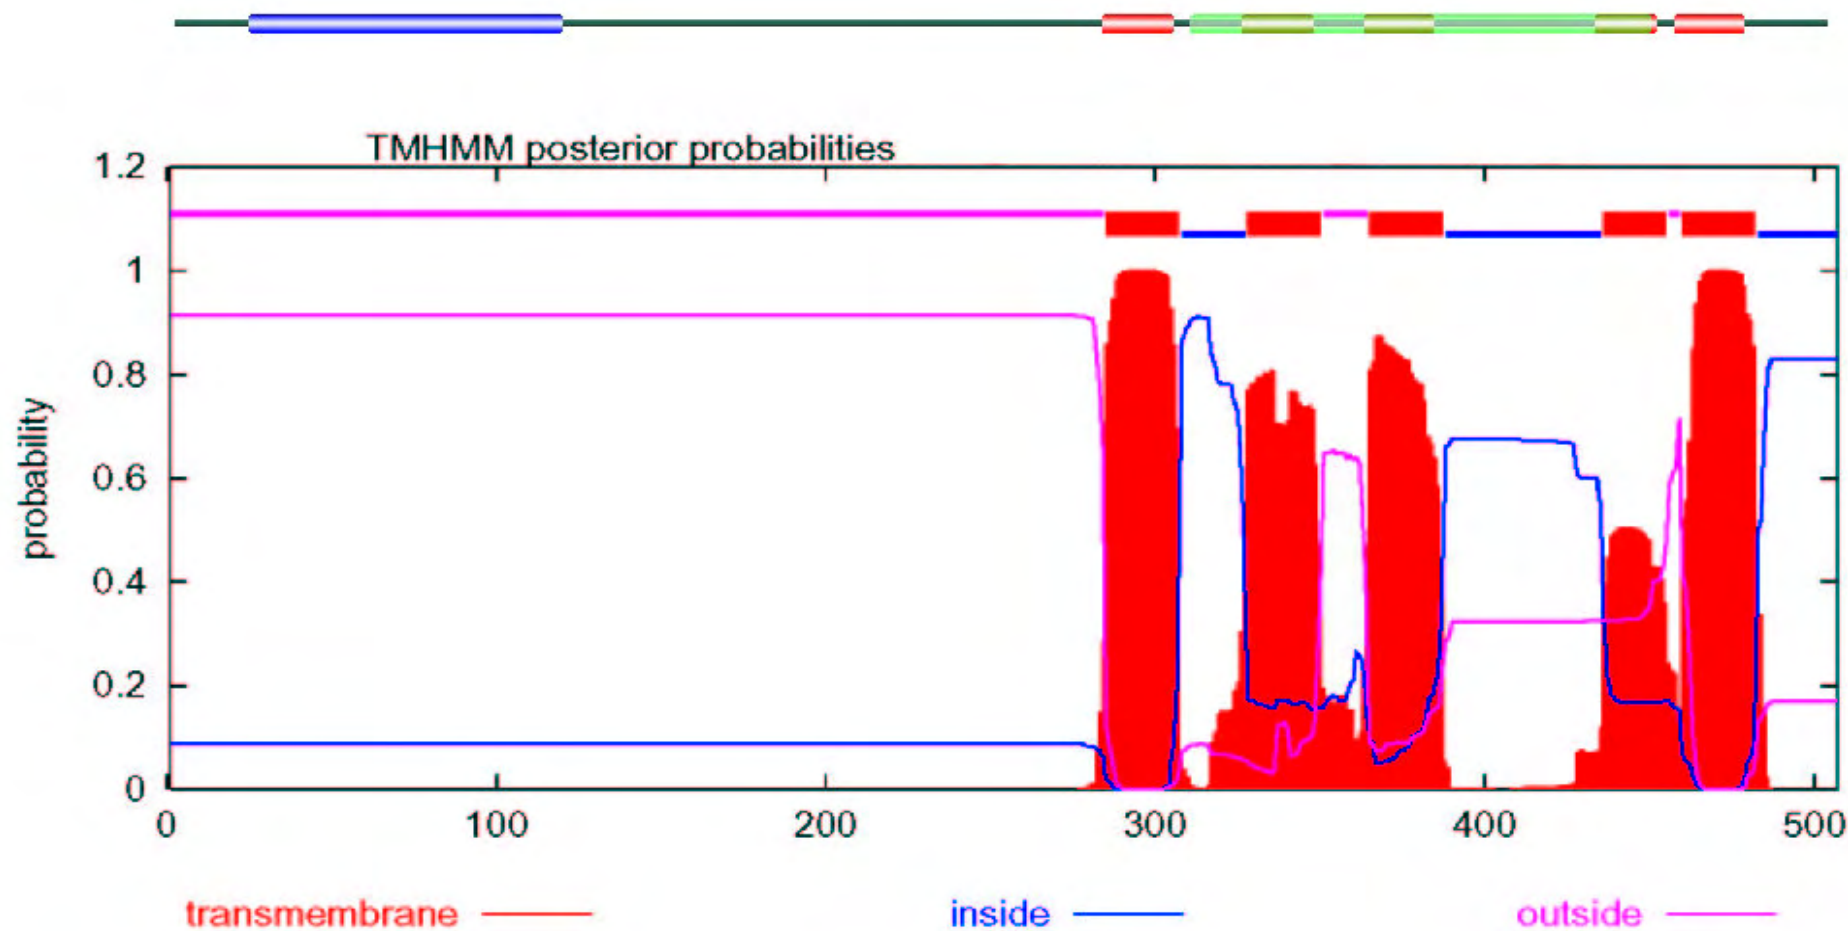

98

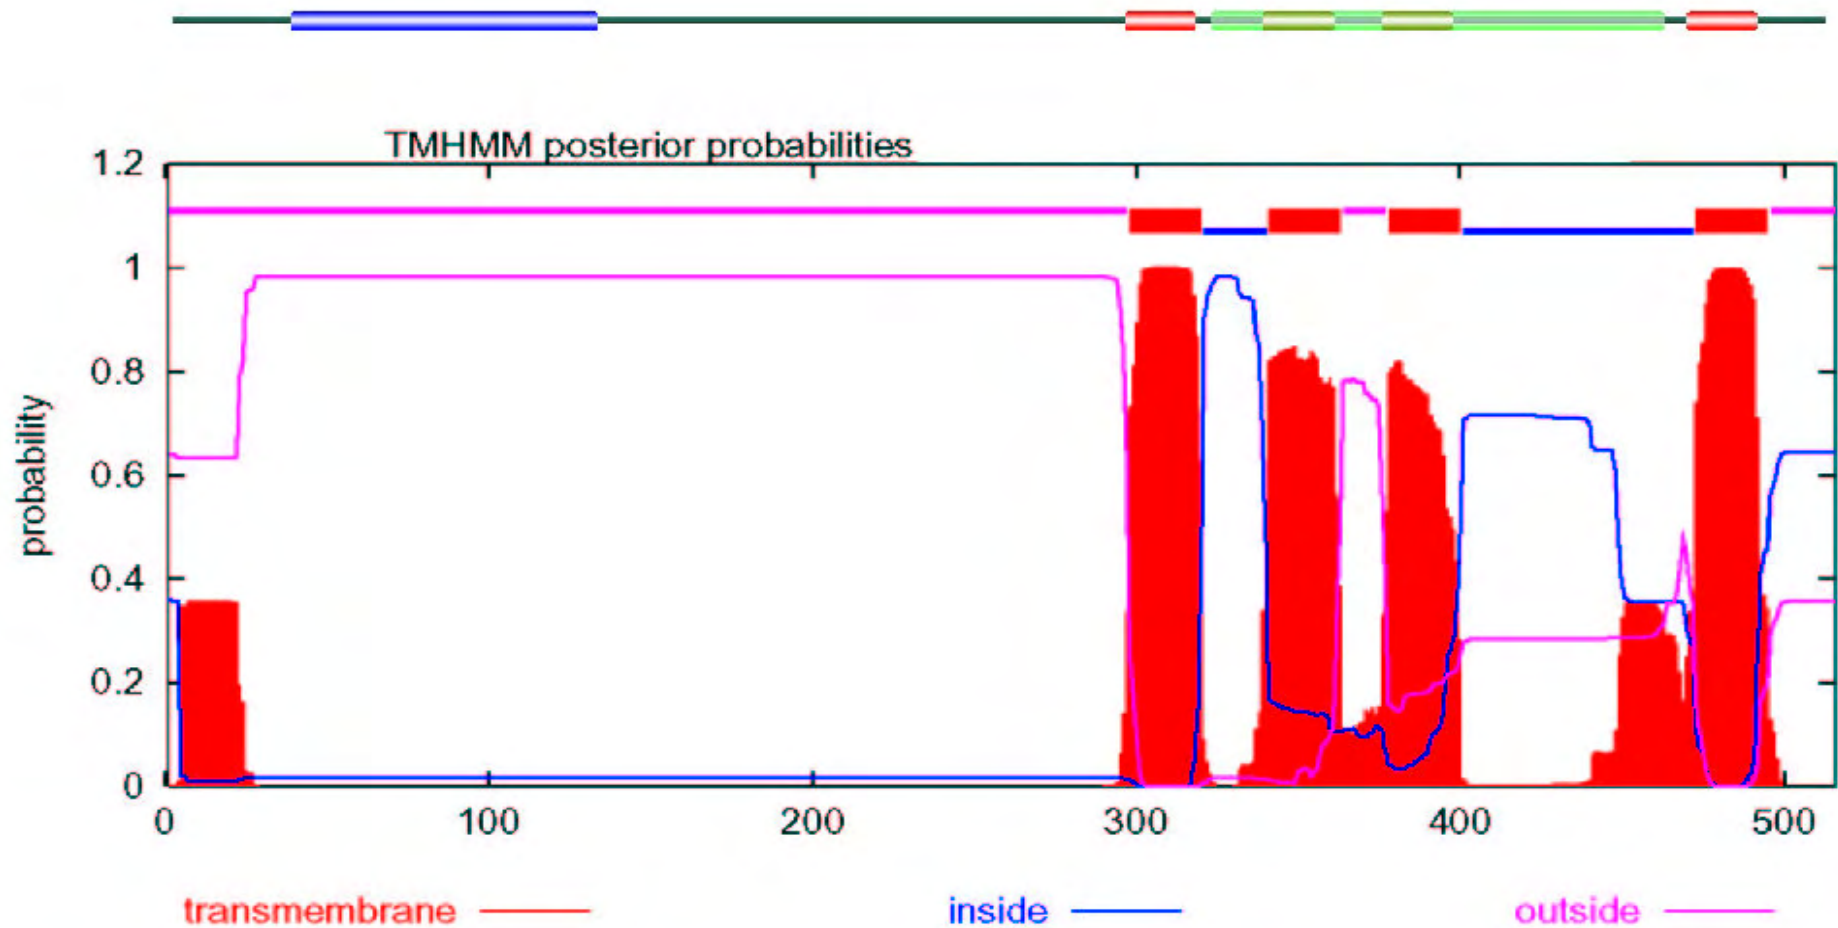

99

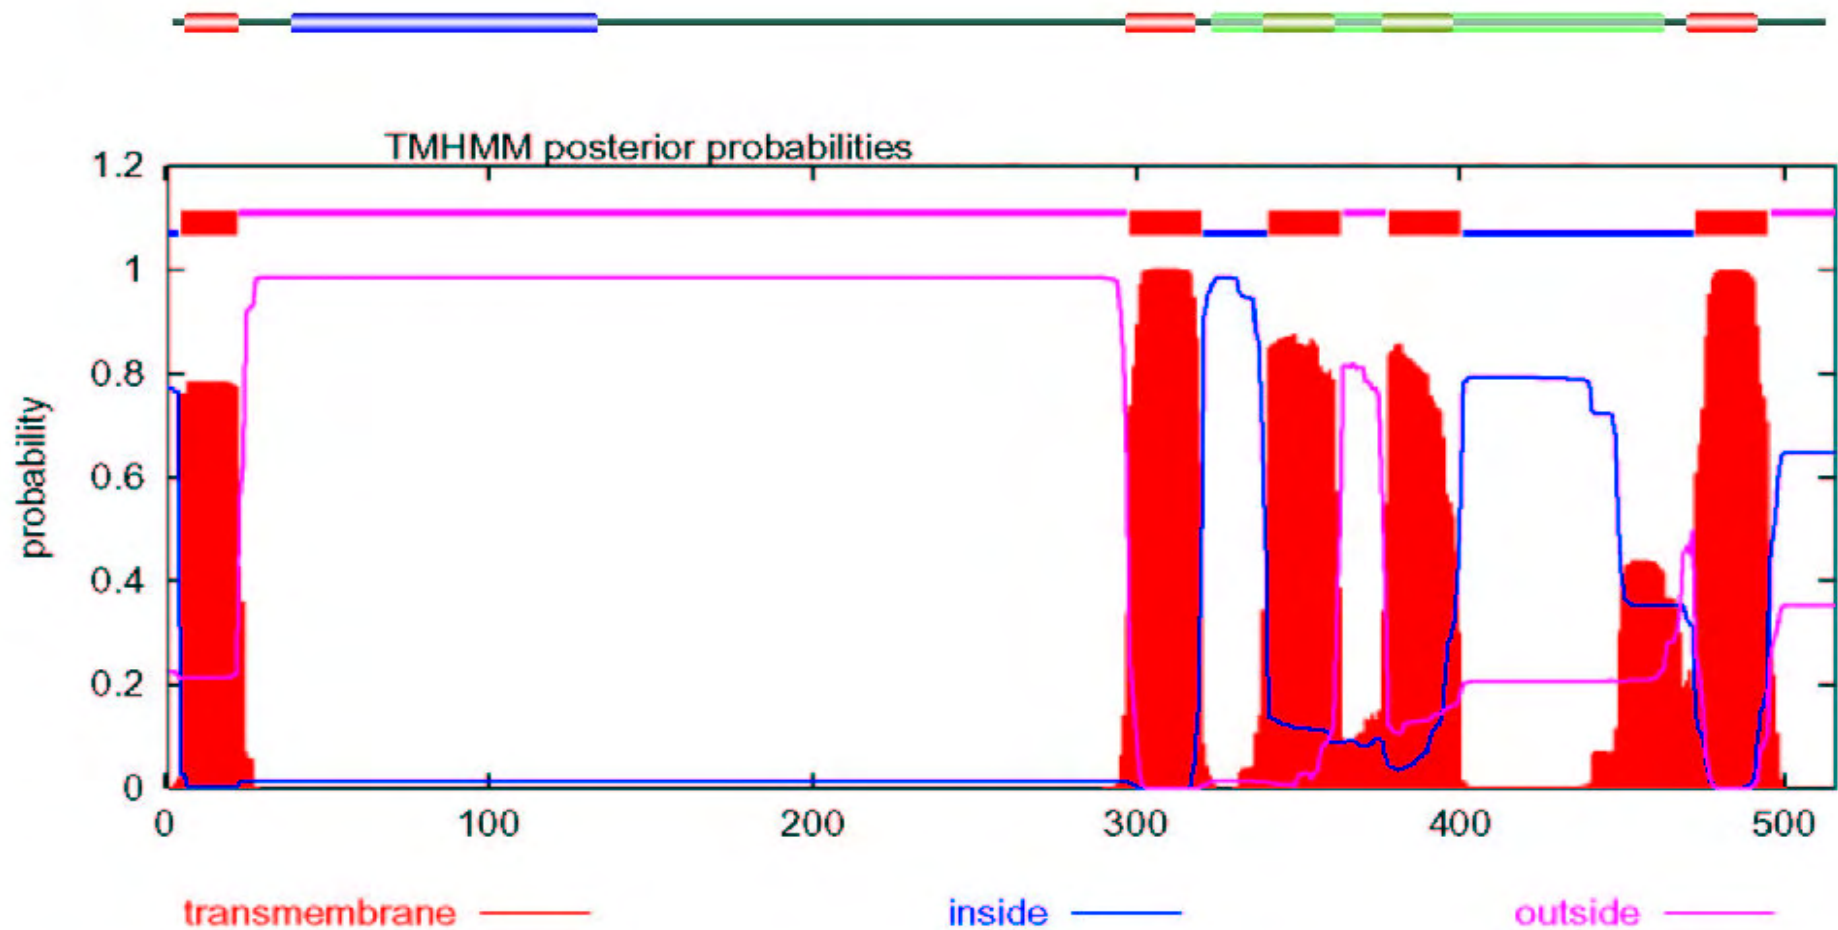

100
