# Supplementary material for: Domain-Based Identification and Analysis of Glutamate Receptor Ion Channels and Their Relatives in Prokaryotes
Source: PubMed Central journal article supplement (PMC2950845; doi:10.1371/journal.pone.0012827), 2010-10-06
Supplement: pone.0012827.s004.pdf [file pone.0012827.s004.pdf]

# group 1 S1 region alignment

```

      10      20      30      40      50      60
1  LKVGITGSPPFVIE...ENNSFQGISLDVWRQVAEDNELVYDLVPQSSPEAGTAAVDQGG 37
1  LKVGVSGSAPFVIQ...EEGGSSGISLQVWRRIAEDNNSYRLIQQATPQKGIALLNDGE 23
1  LRVGVSGSPPFVDK...KAGVYEGISVEVWRQIAHAEKLEYFLIPYPNTDSNIKAVADGK 62
1  LKVGVVGYPPFSY...NEETFRRGISVELWQEIADANLRYSLIAQPGIQVGIQVVAE 41
1  LRVGVAGAAPFV.I...KDNVFKGISVEIWKELALSEGLEYEFVPQNSVANSIDSIKNGE 25
1  LKVGVVGNPPFVFYGEKNAFTGISLDVWRVAESQKWNSEYVRQNSISAGITAVAE 56
1  LTVGVAGDAPFVIHNP.QNNSLEGISLTIWENIADKKNWEYQYKYFTTVDEAL TALQGE 43
1  LTVATKHSPPFAMQK..ENGEWEGISIDLMAIAKKQDLGITFIPMS.LPDMIEAVAVRR 46
1  LKIATKHAPPFAMQD..EHGKWNGLSIDLITAEKQGFRAFPMS.LLDMIEAVNRGE 40
1  LIVATKHSPPFAMKN..AEGEWEGISIDLMAIAEKGKSKLTKEMS.LTEMLKAVEQGE 33
1  LIITGKHSPPFVMKK..SDGSWEGISVALWDKIALENGFSYEFREME.LSDILKGVADNE 65
1  LKVGYQIAPPFIVE...ESHGIPCPEIERRKHSASMKVHYARLEYR.LNNLLKALETGE 94
Lkvgv-g-pPFvm-----g-w-gisidlwr-iA----l-y-fv----l---i-av--ge  consensus

```

```

      70      80      90
58  IDVLVGPISITPRRLAMPGVDFMQPYLAKSGVLLPL 37
58  IDLLVGPISVTPDRRLNLPGVDFMQPYFIGKEGILLPL 23
58  IDLAIGPISITPDRVARNGIEFTQPYFYAEEGVLPSP 62
58  LDVLIGPISITTER..FQKVAFTQPYFNAQTGLLVSA 41
57  LDIIIGPISITSER..LEKVAFTQPYFYAKTGLLASP 25
61  LDILIGPISVTPERAAIEGITFTQPYFSSGIGLLIPG 56
60  VDLLAGPISITSER..VEKFLFSQPYQSSLTIASRD 43
58  VDLAAAALTMIVER..EEQLDFSHPYFQSGLAIAVRE 46
58  VDLAAAALTMIVER..EKQLDFSHPYFQSGLAIAVRE 40
58  VDAAAAALITITKER..EYLLDFSAPYFHSGLAIAVKE 33
58  LDAGVAALITVTAER..EETLDFSQPYVLSRFGIATLE 65
57  IDIAISPLTITASR..MKKFSFSQPYITNLAIFAMKI 94
iDi-igpisiT-eR-----ldFsQPYf-s-lgi-v--  consensus

```

- X non conserved
- X similar
- X conserved
- X all match

# group 1 S2 region alignment

```

      10          20          30          40          50          60
1  VIKDFTQVEDIRDKQIAVVSGTTGEKWAQIYQSRVLPSPNLEQATIERLKSGQAEGVMFD 41
1  QRVTEFSYPQDIKDARVSVIKGSTGEKWAKQYEARINQTETLVDAINLKLNEVDGVIFD 25
1  SATPLFRSVGDLKNKEVAVVRDTTAVDWANFYQADVRETNNLTAAITLLQKKQVEAVMFD 56
1  RETIIRSPAQLQQRRVATIEGTSGVELAERGSMRVLKTENLTSGIELVLSEQAEAVIFD 37
1  TNNSITDPAQLSGQRAAVLEGTSGAELARQRNMRIVPAKTLTAAIDHVLMNRAEAVIFD 23
1  QLSGVMKPSDLDGELIGVVTGTTGVSLARSYGARPPFPVPTLKEAIHLIKRNKVSGVISD 62
1  GIRQVDDLYGKKIGTVKASTSSRFLDELAIRGQNFPTVNDALHLLLEQGKLDAVVYD 46
1  GIQEMDDLYGKKVGTLEASTSSSFLEELAIKGQYFPTVKEAMQALEKGQIDAVVYD 40
1  EIKEFNDLYGKRVGTVKASSSSSVLEESTMKSKHFLTIQDALHALENDQIDAVVFD 33
1  SVTNPRDLHAVKTCTVEGSTSMQVLNEEYIAFQHFATIQDALQALQERRVEAVLYD 65
1  EINGLDDLRKVKVGCIPSTGTADFLNRFKIKFVDFSTVEDGLVAVQKDEIAAFVYD 94
1  STITQVEQFPGKKIAASAGSPAIGFIEEHQGQKVLVNNLSSQAMERIKDKSVDGVVFD 43
-----i-----dl-gkkvg-v-gstg--f-----ir-----tl-dai--l----vdavvfd  consensus

```

```

      70          80          90          100         110         120
60  VPALRYYLYQNPT.APLKIADLAVSFEDYGFILPLDNKLIRELDIEIVKLKQSGREEETI 41
61  VPALQYYLRNDRE.QRLKLSPVNFADEPYGFIVSLDNSFIKNLDIKLLEMRENGKIREIE 25
61  RPALIYYTRQNPN.LNLEVTEIRVSLEPYGFVLKENSPLQKTINVEMLNLLYSRVIAEFT 56
60  RPAMRHHIKQNPH.LAVQLAPFTLAEETYGFVFKTGNPLRNPMNVSILRLQRLGEIKSTA 37
60  RPAIRFHLKNNPE.LAVQLAPFTLAEQTYGFAFRTGDPLRTPLNISILKLQRSGAVEAIS 23
60  TPILSYYMKNSPD.KSLTLAPFRLSLQTYGFVVPSDSPLERLINIELLRLERSHQVKAIS 62
57  EPILRYLITTGEI.HGIKVVNRSFRHEYYALALPPRSTERETLNRNLLEIINSKDWKEIR 46
57  EPILRYMITSGEI.HGVRVVERSFKPEYYAFALPPGSPETETLNRNLLGIINSLAWKEIK 40
57  EPIMRYVLTLGDI.HGVTIINQVLSPEYYAIALPPQSQLRETFNRNLLDITVSERWKKIN 33
57  EPIMRYMIASGKF.QGIKVIETSFRYEYYAVALPPDSPRTEDINRSLLHYLESENWRSVQ 65
57  HATLSYYVNEGSFDEVIEVIPSSYYREYFSFATS.NYAMLKPVNESLIKIIESDNWVVKL 94
58  RPQLLFYKNKHKA.ENHIPSAEYYKGYGFAFRADSKLVNDVNVLLRLAEDQKIEQIM 43
-p-lry-i-----i-v-----e-ygfal---s-l---lni-ll-l--s---ik-i-  consensus

```

```

      130
119  EREIKGDFENQ 41
120  SKWLSSSKDN 25
120  ERWLGPGIEENQ 56
119  NKLLN 37
119  KRLLN 23
119  DRILK 62
116  FKYLHNE 46
116  YKYLREE 40
116  NKYLNTKQ 33
116  FRYLDVVP 65
116  KKYHVENYK 94
117  AEYLGDK 43
-kyl-----  consensus

```

X non conserved  
X similar  
X conserved  
X all match

# group 1 channel region alignment

```

      10      20      30      40      50      60
1  DSPTIFSRVAVFFGWAVISSILVLLISVLLVVGSLIWLAEERRENSSEQFPKRWLPGIASGM 37
1  KPSTLLNRLQVFLGWAVLSSVLVLITVLLVVGSLIWLAEERRSNSEQFPAQPLPGIASGM 23
1  QPPGLWARIKPLFGVAALSSITFLFTLFCVGNLIWLAEERKNPEHFPPQYIKGLGNIGI 62
1  KPVSLLWERFSPFFGIAALSSAGVLTLLFLVGNLIWLAEHRKNPEQFSPHYPEGVQNGM 56
1  EKVSVWSRIRPIFRVAVISSVGGFLFLILFVGNLMWLAESRRNPEQFPRQYIRGVGSGM 41
1  ESPTVWSIIRPFFGLAFISSVCLLTVLLFIMGNLIWLAEERRNKEQFPPNYFHVGVGNAM 25
1  ENASIWGKIKPFFSMQLLIAVAIFLSLLAIVGLLFWLAERKHSPEQFPADPKRGIANGM 43
1  KDDGWEYALRRRLFSPAFLLKVLGGLSLLLLISGFLVWVFERRNPNDFGGGPVEGIWSGF 46
1  KEDGWKYALGRLFSPAFLLRILGGLSLLLLISGFLVWVLFERRQNPQDFGGGPAEGIWSGF 40
1  KETRWVHMIIGRLFSPAFLLQVLAALSLLLLISGFLVWVLFERRKNSDHFGGTPAQGIWSGF 33
1  EGVDWKNIKLVFFSYGFFRIVVLLSLVLLISGFLVWVLFERRKNPEHFGGSPTHGIGSGF 65
1  EKSKDLISFFLNFFTLNFFKAIIFSLLFLVILIFGLAVWVLFKKNNSAQFREG.LNGIGDGI 94
-----lw--ik-ff--a-l--v--l-l-llllivG-lvWlaErrrnpeqF-----Gigsgm  consensus

```

```

      70      80      90     100     110
60 WFAVVTLLTTVGYGDKAPISHTGRGITATWVMVLSLIAVSSLTASLASAFTLFFSGA 37
60 WFAVVTLLTTVGYGDKAPITRIGRLTAIWMVTSLIAVSSLTASLASAFTLFLSGD 23
60 WFAVVTLLTTVGYGDRAPLTKAGRSIAGVWVMVLSLASVSTITAGLASAFTVSLSQT 62
60 WFAVVTLLTTVGYGDRSPRTKLGQLVAGVWVMVALLSFSSTITAGLASAFTALSEA 56
60 WFAVVTLLTTVGYGDKAPITKTGKIITSLWMTTLVAASSLTAGIATVMTLLLSAE 41
60 WFAVVTLLTTVGYGDMTPVTKSGRIITGVWVMVLTIVTISLTAGIATALTVSLTN 25
60 WLAIVTMSTTGYGDMAPVSLKGRVVALGCWMTISLIFATSMIAGIASLTVSSFSS 43
60 WAAAVTMTTVGYGDKAPKTPPGRIVALIWMFTSLVVTSGFTAAMTTSLTVGSLGT 46
60 WAAAVTMTTVGYGDKAPKTRPGRMVVALVWMFTSLIVTSGFTAAMTTSLTVGSLGS 40
60 WAAAVTMTTVGYGDKTPIITLLGKLVALVWMFTSLMVTSGFTAAMTTVLTVESLES 33
60 WAAAVTMTTVGYGDKSPKTPAGRVVALVWMFASLVMVTSGFTAAMTTTTLTVGSLGV 65
60 WWSAVTMTSTVGYGDKSPITAWGRLLSVVWIFTGVITISGLTAGISSLTVHQLKT 94
WfalVTmtTvGYGDKaPitk-Grlva-vWmv-sli-issltAgias-ltv-----  consensus

```

- X non conserved
- X similar
- X conserved
- X all match

# group 2 S1 region alignment

|   |          |       |        |                  |          |          |                               |                    |    |
|---|----------|-------|--------|------------------|----------|----------|-------------------------------|--------------------|----|
|   | 10       | 20    | 30     | 40               | 50       | 60       |                               |                    |    |
| 1 | LVVATRA  | I     | PPFVFN | .DNGELSGFSIDLWRS | IASQIGA  | ESKFVEY  | PNVADLLSSVRNGKAN              | 3                  |    |
| 1 | LVVATRA  | I     | PPFVFN | .DNGELSGFSIDLWRS | IASQIGA  | ESKFVEY  | PNVADLLSSVRNGKAN              | 2                  |    |
| 1 | FVVATRA  | I     | PPFVFT | .DNGELSGFSIDLWRS | IASQIGA  | ESKFVEY  | PSVPDLLSSVQNGKAN              | 1                  |    |
| 1 | LLVATRVI | I     | PPFVLS | .NKGELSGFSIDLWRS | IATQIGT  | ESKLI    | EYSSVPELISATKDNKVN            | 4                  |    |
| 1 | VRVATRVL | I     | PPFVMD | .ERGKLN          | GFSIELW  | ERIAERIG | VTTEYVVRPNVTELLSTVRDGKAD      | 6                  |    |
| 1 | LVVNTVTR | P     | PFVSM  | .VGEHET          | GFTMDL   | IREVS    | QRLGWDIQINRVDNFAQMLEEVERGEAD  | 9                  |    |
| 1 | LQVTTVTR | P     | PFVSV  | .EDGVE           | TGFSMD   | LLAAL    | ADKLGIGYTLEKKEKFS             | DMLAAVMDGEAD       | 5  |
| 1 | IKVGSYHC | P     | PFVIH  | ENDE             | YIGLTI   | LLWEQ    | IAKRLNLQYEIKQYP               | .LTELDAVAEGKIN     | 50 |
| 1 | LKVGAYHC | P     | PFIF   | ESSEE            | QYDGL    | SMILW    | QRIAEIMQVEYKVS                | HYG.LQELLSAAEVGEID | 42 |
| 1 | LVVGVYVS | P     | PFVEEH | DDGNY            | SGMAID   | LWETV    | ADRMDLAFRYATYPTFGSLVRATASGEVD | 63                 |    |
|   | lvVatr-i | PPFvf | --d    | -gelsGfsidLwrsia | -riglesk | -v-yp    | -v-ellsav--gka-               | consensus          |    |

|    |         |        |        |         |         |          |           |       |    |
|----|---------|--------|--------|---------|---------|----------|-----------|-------|----|
|    | 70      | 80     | 90     |         |         |          |           |       |    |
| 60 | AGIAAIS | ITAER  | QQ     | QFDFS   | LPMFSG  | GLQILVRN | 3         |       |    |
| 60 | AGIAAIS | ITAER  | QQ     | QFDFS   | LPMFSG  | GLQILVRN | 2         |       |    |
| 60 | AGIAAIS | ITAER  | QQ     | QFDFS   | LPMFSG  | GLQILVRN | 1         |       |    |
| 60 | L       | GIAAIS | ITAE   | REQN    | FDFS    | LPIFAS   | GLQIMVRN  | 4     |    |
| 60 | L       | AIS    | ITA    | QRE     | AQFDFS  | HPMYDS   | GLAILVQV  | 6     |    |
| 60 | M       | AANIS  | ITAG   | REAV    | MDFS    | QPIFES   | GLQIMLHQ  | 9     |    |
| 60 | M       | AIANIS | ITAA   | RETE    | MDFS    | QPIFES   | GLQILVPA  | 5     |    |
| 60 | I       | GISCIS | ITP    | ERE     | ERL     | DFSHS    | FYETHLAI  | AVK   | 50 |
| 60 | V       | GVSCIS | ITP    | DRE     | EHV     | DFSHS    | FYETHLAI  | AVKN  | 42 |
| 61 | A       | AVTN   | LTIT   | RE      | AELIA   | FTQ      | PWYDAGLR  | IMVPS | 63 |
|    | mgiaais | ITaeRe | -qfdFs | -pmfesg | LqIlvrn |          | consensus |       |    |

- X non conserved
- X similar
- X conserved
- X all match

# group 2 S2 alignment

```

      10      20      30      40      50      60
1  DINSVSDLPGRVVATTTGSTAATYLRKQKQKISVLEVPKIEQAYDALETKKAEAVVFDSPVL 3
1  DINSVSDLPGRVVATTTGSTAATYLRKQKQKISVLEVPKIEQAYDALETKKAEAVVFDSPVL 2
1  DINSVSDLPGRVVATTTGSTAATYLRKQKQKISVLEVPKIEQAYDALETKKAEAVVFDSPVL 1
1  DIRSIDDLPGKVVATTAGSTAATYLRHHISVLEVPKIEEAYKALQTKKADAVVFDAPVL 4
1  GISSPSDLIGKTVASVEGSTAACKYLATLRVDTLVFPTVAEATASTESGKTSAVVYDSPVL 6
1  SVNSVNDLYGKRVGTIQGSTAAGFLDRREIDYVAFPGLDKMLIEDFEDGDTRIVVFDAPVL 9
1  SVNSVNDLYGQEVGTIDGSTAAGFLTRRIDFAAFSDLQEMITAFERGALDAIVFDAPIL 5
1  GISALSDLPGNTVGVLSGSVAEQYMRDMGIATRSYVNIASVVALREGRLDAVVGDAPIIL 63
1  DIKNPNDLANIKTGAKKSSSTSSQFLTNHSHIVHKAYNTVEDMLVLEKGEIEAVIADDPVL 50
1  DVKGINDLISKVKTGAKQGTASLLLSNHSLAHDTYKMDALLALEKQLDAVVADDAVVL 42
dinsvsDLpgk-vgt--gstaa-ylkq--i--l-yp-ie-al-aletgk-davvfd-pvL consensus

```

```

      70      80      90      100      110      120
61 LFYAANQGGG...KVEVVGSVFREENYGIIVLPNNSPYRKPINNALLKLKENGTYSLYD 3
61 LFYAANQGGG...KVEVVGSVFREENYGIIVLPNNSPYRKPINNALLKLKENGTYSLYD 2
61 LFYAANQGGG...KVEVVGSVFREENYGIIVLPNNSPYRKPINNALLKLKENGTYSLYD 1
61 LFYAANECKG...KVEIVGSIILREESYGIILPNNSPYRKPINQALLNLKENGTYSLYD 4
61 RYFASHDGRG...RMKLACPTFREEKYGIAFKQNSTLRKRVNEELLRLREDGTYGDMQV 6
61 NHYVKTDGAG...IGHVMGRKFLTEYYGIFPQGS DMVEPFNRALLKMQEDGAYETLYR 9
61 SYFASHQGKG...KAVTTGATFLRENYGIAFP TGSARVEEVNQALLALREDGTYEELYR 5
61 EHYVLTHQKD...NLAVVGNLFHPDKYGFAPHESNL TTPTTLELLDLQEDGTLGNLRL 63
61 KYQIKKAKERGVYTD MIVLPYQFEKQNYGFATIEDNSPYEEELNRRALLKTRQSIEWRQALN 50
61 RYMIKKGKGD LFDLDTVLPYQLEKQNYGLVLIENSPYEEKINRALLQVRETNEWHQILL 42
-yya---g-g----kv-vvg-vfreenYGivlpnnSpyrkpinnaLLklre-gty-sly- consensus

```

```

117 KWFGVKNS 3
117 KWFGVKNS 2
117 KWFGVKDS 1
117 KWFDPKNS 4
117 RWFGTEDNS 6
117 KWFGQSF 9
117 KWFGRRN 5
117 EYFGSRN 63
121 KYFTDIP 50
121 EYFAEK 42
kwFg-kn-- consensus

```

```

[X] non conserved
[X] similar
[X] conserved
[X] all match

```

# group 2 channel region alignment

```

      10      20      30      40      50      60
1  PKLSNSGTPNILLSLFFSTTILQVLGLALFLIVIAAHVIWLSERHQKEGM...ISPSYFPG 3
1  PKLSNSGTPNILLSLFFSTTILQVLGLALFLIVIAAHVIWLSERHQKEGM...ISPSYFPG 2
1  PKLSNSGTPNILLSLFLSTTILQVLGLALLLIVIAAHVIWLSERHQKEGM...ISQSYFPG 1
1  LESKNSAFPNIQLFFSTSLQVLGVALVLIVIAAHIWLSERNHKEGM...ISESYFPG 4
1  GAQHQSFMDIV.IQWSTQLLPAMGLGFILVMIPAHLIWFIERRGESDLP..VHRSYYPG 6
1  DDVSEPSLISATMSWDLFAAIAIAFVLLLVGGMLMWFERRAQPYFDRPLKDAWFP. 9
1  ETNAGSSLLRALLSRDLFLAIGAAFVILLTGGMLMWFERRAQPYFDRKLHEAWFP. 5
1  QGYLASIINILTNKKLLVLATILLCAAAALIGSVFYFLEHKINDKLY..SMQTRPAR 50
1  RSYLDSFISITNKTLWKAICLFLFVAISVGTIFYLLERKNNDKLY..SMPTKRGR 42
1  QGGGGFRGMLNGLQNAHGLRAYIFLLSMILIAATVGLSLFDRRFDPDHP...RRWRES 63
----nsg-p-ilsll-sttll--iglalvliviaahviwl-err--e-m---i--syfpg  consensus

```

```

      70      80      90     100     110     120
58  IFKACWAAAATLAT..QADEMPKGVIGRILAIWVFIIGVLFVITYFTAATTSLTVQQLQA 3
58  IFKACWAAAATLAT..QADEMPKGVIGRILAIWVFIIGVLFVITYFTAATTSLTVQQLQA 2
58  IFKACWAAAATLAT..QADEMPKGVIGRILAIWVFIIGVLFVITYFTAATTSLTVQQLQA 1
58  IFKACWAAAATLAT..QADEMPKGVIGRILAIWVFIIGVLFVAYFTASATTSLTVQQLQG 4
57  IVLAAAYWVATLMGG..QADPMPTRRASRVVAVIGIYVGLVAVAYFTAYATSMLTVQQLKS 6
57  ...SFWWALNLVVNGGFEERVPRSAIGRVFGVLLVLSLFFVVSFVAKITAAMTVEAING 9
57  ...SFWWALNLVVNGGFEERVPRSAIGRVFGVLLVLSLFFVVSFVAKITAAMTVEAING 5
55  FVEGFILGLLFIITKGFNFYEFKTLISGRVLTVIAIFSTLFTASITAVLASTFTLGLLNS 50
55  IAEAFILGLVLFITKGFNFYEFKTLISARVVTVLIAMFSTVFTASITAVLASSLTLEQLRF 42
55  IAEAFYQVMLIITSGRARKNLFGVGRIVQALWLVIGVAVTAYITSSVTSVMTTVSLTQ 63
i--afwwaa--latg-qad-mpkgvigRilaviwm-igvlfvayfta-atsslTvqqlqg  consensus

```

- X non conserved
- X similar
- X conserved
- X all match
