# Supplementary material for: Domain-Based Identification and Analysis of Glutamate Receptor Ion Channels and Their Relatives in Prokaryotes
Source: PubMed Central journal article supplement (PMC2950845; doi:10.1371/journal.pone.0012827), 2010-10-06
Supplement: pone.0012827.s005.pdf [file pone.0012827.s005.pdf]

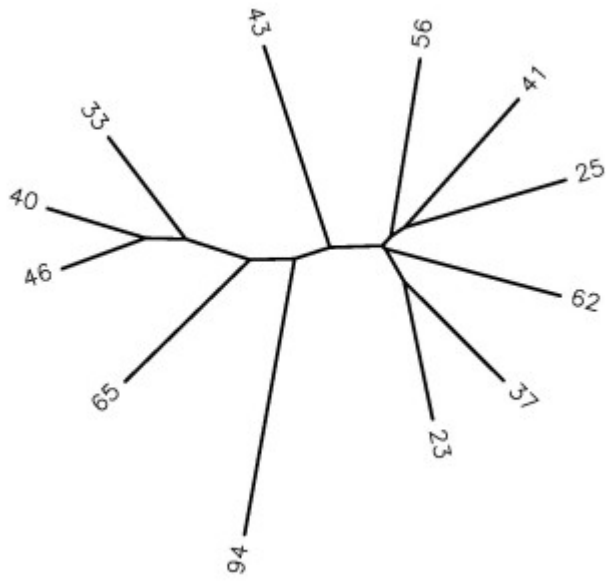

Group 1 : S1

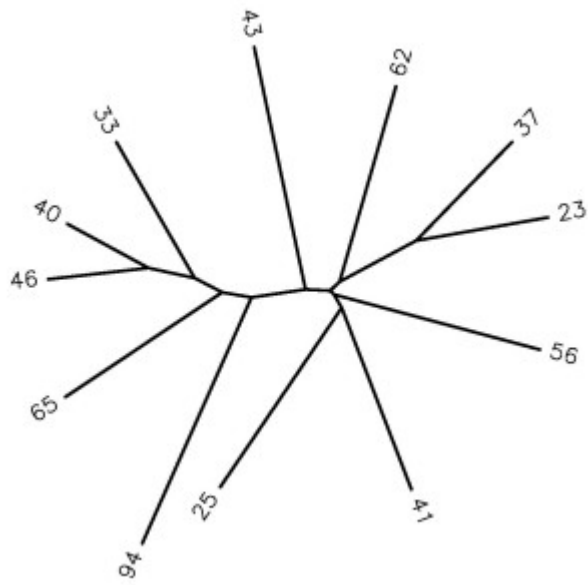

Group 1 : S2

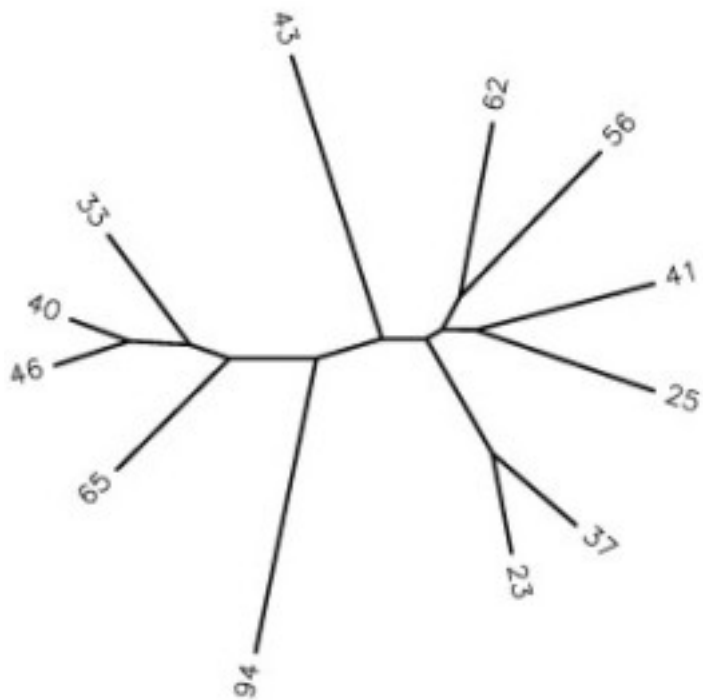

Group 1 : channel

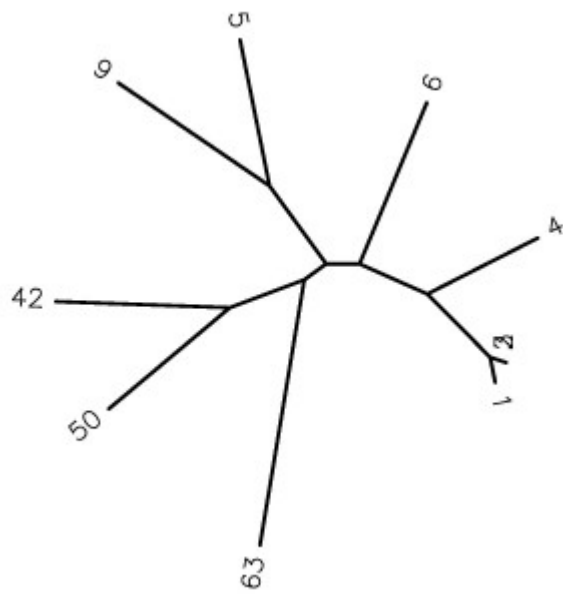

Group 2 : S1

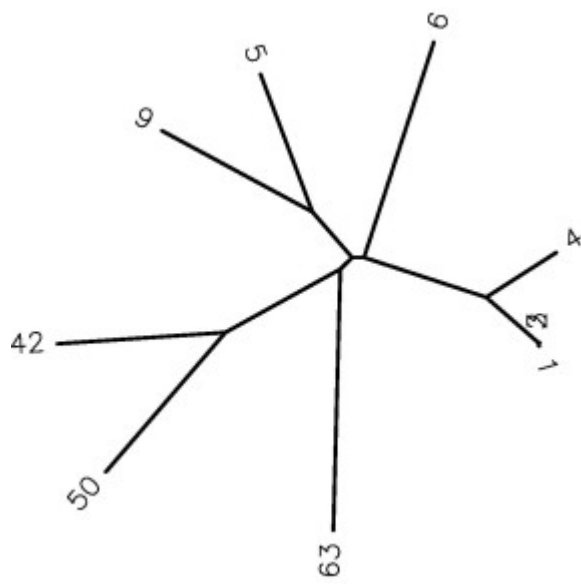

Group 2 : S2

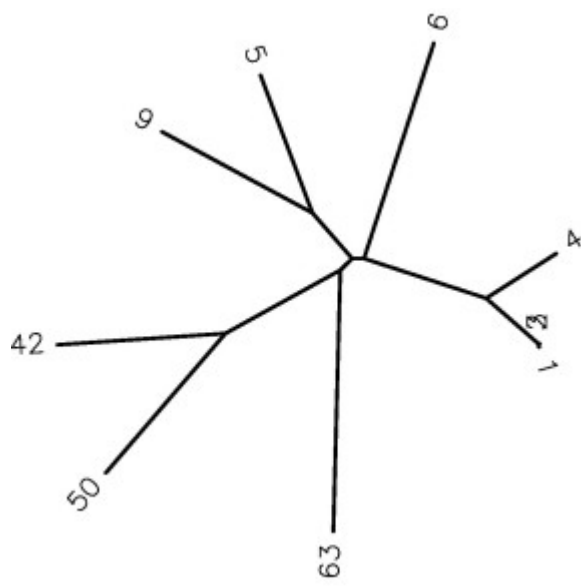

Group 2 : channel
